# Supplementary material for: TephraNZ: a major- and trace-element reference dataset for glass-shard analyses from prominent Quaternary rhyolitic tephras in New Zealand and implications for correlation
Source: Copernicus journal article supplement (doi:10.5194/gchron-3-465-2021), 2021-09-23
Supplement: Supplementary file 1 [file gchron-3-465-2021-supplement.zip]

Archive with 4 entries (4 files):
- gchron-3-465-2021-supplement-title-page.pdf
- TephraNZ_SM_Tables_FINAL4.xlsx
- TephraNZ_Tables_FINAL4.xlsx
- TephraNZ_SM_FINAL.pdf
