# Supplementary material for: TephraNZ: a major- and trace-element reference dataset for glass-shard analyses from prominent Quaternary rhyolitic tephras in New Zealand and implications for correlation
Source: Copernicus journal article supplement (doi:10.5194/gchron-3-465-2021), 2021-09-23
Supplement: Supplementary file 1 [file gchron-3-465-2021-supplement.zip › gchron-3-465-2021-supplement-title-page.pdf]

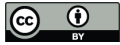

*Supplement of*

**TephraNZ: a major- and trace-element reference dataset for glass-shard analyses from prominent Quaternary rhyolitic tephras in New Zealand and implications for correlation**

**Jenni L. Hopkins et al.**

*Correspondence to:* Jenni L. Hopkins ([jenni.hopkins@vuw.ac.nz](mailto:jenni.hopkins@vuw.ac.nz))

- [gchron-3-465-2021-supplement-title-page.pdf](#)
- [TephraNZ\\_SM\\_FINAL.pdf](#)
- [TephraNZ\\_SM\\_Tables\\_FINAL4.xlsx](#)
- [TephraNZ\\_Tables\\_FINAL4.xlsx](#)

The copyright of individual parts of the supplement might differ from the article licence.
