# Supplementary material for: TephraNZ: a major- and trace-element reference dataset for glass-shard analyses from prominent Quaternary rhyolitic tephras in New Zealand and implications for correlation
Source: Copernicus journal article supplement (doi:10.5194/gchron-3-465-2021), 2021-09-23
Supplement: Supplementary file 1 [file gchron-3-465-2021-supplement.zip › TephraNZ_Tables_FINAL4.xlsx]

## Sheet: Table 1 
Table 1. Overview of the foundation tephra included in TephraNZ database
Tephra name	Alternative name(s)	Caldera source	Smithsonian GVP number	Age (cal. yr BP, 2sd) (unless otherwise shown)	Dating method*	Age reference	Proximal/ distal	Long.	Lat.	Site number (Fig. 1)	Site description (Fig. 1)	Date of EPMA analysis	Date of LA-ICP-MS analysis
Kaharoa		Okataina	241050	636 ± 12	C14 wiggle match	1	P	176.53	-38.3091	1	Ash Pit Road	10_12_19	28_01_20 (run#1)
Taupō	Unit Y	Taupō	241070	1718 ± 10	C14 wiggle match	2, 3	P	176.199	-38.7473	2	SH 5	10_12_19	28_01_20 (run#1)
Waimihia	Unit S	Taupō	241070	3382 ± 50	C14 Bayes model	4	D	176.224	-38.8421	3	Kaipo Bog	10_12_19	28_01_20 (run#1)
Unit K (Taupō series)		Taupō	241070	5088 ± 73	C14 Bayes model	4	D	176.224	-38.8421	3	Kaipo Bog	10_12_19	28_01_20 (run#2)
Whakatane		Okataina	241050	5542 ± 48	C14 Bayes model	4	D	176.224	-38.8421	3	Kaipo Bog	11_12_19
							P	176.53	-38.3091	1	Ash Pit Road	11_12_19	28_01_20 (run#2)
Tuhua		Mayor Island		7637 ± 100	C14 Bayes model	5	D	176.224	-38.8421	3	Kaipo Bog	11_12_19	28_01_20 (run#2)
Mamaku		Okataina	241050	7992 ± 58	C14 Bayes model	4	D	176.224	-38.8421	3	Kaipo Bog	11_12_19	29_01_20 (run#3)
Rotoma		Okataina	241050	9472 ± 40	C14 Bayes model	4	P	176.53	-38.3091	1	Ash Pit Road	11_12_19
							D	176.224	-38.8421	3	Kaipo Bog	11_12_19	29_01_20 (run#3)
Opepe	Unit E	Taupō	241070	10,004 ± 122	C14 Bayes model	4	D	176.224	-38.8421	3	Kaipo Bog	12_12_19	29_01_20 (run#3)
Poronui	Unit C	Taupō	241070	11,195 ± 51	C14 Bayes model	4	D	176.224	-38.8421	3	Kaipo Bog	12_12_19	29_01_20 (run#3)
Karapiti	Unit B	Taupō	241070	11,501 ± 104	C14 Bayes model	4	D	176.224	-38.8421	3	Kaipo Bog	12_12_19	30_01_20 (run#4)
Waiohau*		Okataina	241050	14,018 ± 91	C14 Bayes model	4	D	176.224	-38.8421	3	Kaipo Bog
							P	176.325	-38.1686	4	RNL pumice quarry
Rotorua*		Okataina	241050	15,738 ± 263	C14 Bayes model	4	D	176.224	-38.8421	3	Kaipo Bog
							P	176.325	-38.1686	4	RNL pumice quarry
Rerewhakaaitu*		Okataina	241050	17,209 ± 249	C14 Bayes model	4	D	176.224	-38.8421	3	Kaipo Bog
							P	176.325	-38.1686	4	RNL pumice quarry
Okareka		Okataina	241050	23,455 ± 300	Bayes model	19	P	176.325	-38.1686	4	RNL pumice quarry	12_12_19	30_01_20 (run#4)
Te Rere		Okataina	241050	25,171 ± 964	C14 Bayes model	4	P	176.325	-38.1686	4	RNL pumice quarry	12_12_19	30_01_20 (run#4)
Kawakawa/Oruanui		Taupō	241070	25,358 ± 162	C14 Bayes model	6	P	175.941	-38.5731	5	Poihipi Road	12_12_19	30_01_20 (run#4)
Poihipi		Taupō	241070	28,446 ± 670	C14 Bayes model	4	P	175.935	-38.565	6	Oturoa Road	12_12_19	30_01_20 (run#5)
Okaia		Taupō	241070	28,545 ± 345	Bayes model	19	P	175.941	-38.5731	5	Poihipi Road	12_12_19	30_01_20 (run#5)
Unit L (Mangaone Subgp series)		Okataina	241050	30,600 +600 -1500	C14+ ZDD Bayes model	9	P	176.14	-38.0925	7	Dansey Road	12_12_19	30_01_20 (run#5)
Awakeri	Unit J	Okataina	241050	31,000 +900 -800	C14 + ZDD Bayes model	9	P	176.722	-38.0271	8	Bowditch Quarry SH30	13_12_19	31_01_20 (run#6)
Mangaone	Unit I	Okataina	241050	31,100 +1000 -400	C14 + ZDD Bayes model	9	P	176.722	-38.0271	8	Bowditch Quarry SH30	13_12_19	31_01_20 (run#6)
Hauparu	Unit F	Okataina	241050	35,200 +1000 -2000	C14 + ZDD Bayes model	9	P	176.246	-37.7685	9	Little Waihi Road, Maketu	13_12_19	31_01_20 (run#6)
Maketu	Unit D	Okataina	241050	36,100 +900 -800	C14 + ZDD Bayes model	9	P	176.246	-37.7685	9	Little Waihi Road, Maketu	13_12_19	31_01_20 (run#6)
Tahuna		Taupō	241070	38,400 +1700 -1400	C14 + ZDD Bayes model	9	P	176.749	-37.9477	10	Braemar Road	13_12_19	31_01_20 (run#7)
Ngamotu	Unit B	Okataina	241050	39,600 +4500 -1900	C14 + ZDD Bayes model	9	P	176.749	-37.9477	10	Braemar Road	13_12_19	03_02_20 (run#8)
Earthquake Flat Ig		Kapenga		45,160 ± 2900	(U-Th)/He	10	P	176.251	-38.2796	13	Tumunui Road	16_12_19	03_02_20 (run#8)
Rotoehu Ash		Okataina	241050	45,170 ± 3300	(U-Th)/He	10	P	175.885	-37.9947	11	Tapapa Road	13_12_19	03_02_20 (run#8)
Rotoiti Ignimbrite								176.695	-37.8683	12	Mimiha Stream, SH2	13_12_19	03_02_20 (run#8)
Ararata Gully 318	? Mamaku Ig	? Rotorua		0.235 Ma	MIS7c/b boundary	11	D	174.358	-39.553	14	Ararata Gully	16_12_19	03_02_20 (run#9)
Kakariki 272	< Rangitawa = ? Mamaku			0.235-0.3 Ma	Stratigraphy	12, 13	D	175.747	-40.1645	15	Rangitikei Valley	16_12_19	03_02_20 (run#9)
Fordell 449	< Rangitawa	?Whakamaru		0.31 Ma	MIS9a	13	D	175.255	-39.9426	16	Kauangaroa Road	16_12_19	03_02_20 (run#9)
Upper Griffin Road 307	< Rangitawa	? Whakamaru		0.3-0.4 Ma	Stratigraphy	13	D	175.255	-39.9426	16	Kauangaroa Road	16_12_19	10_06_20 (run#10)
Lower Griffin Road 309	< Rangitawa			0.3-0.4 Ma	Stratigraphy	13	D	175.255	-39.9426	16	Kauangaroa Road	16_12_19	10_06_20 (run#10)
Onepuhi 267		Unknown		0.57 Ma	Astronomical	15, 21	D	175.478	-40.0739	15	Rangitikei Valley	17_12_19	10_06_20 (run#10)
Kupe 481		Unknown		0.63 ± 0.08 Ma (1sd)	glass-ITPFT	15, 16, 21	D	175.303	-40.0018	18	Turakina	17_12_19	10_06_20 (run#11)
Kaukatea 232		Unknown		0.86 ± 0.08 Ma (1sd)	glass-ITPFT	15, 16, 21	D	175.103	-39.9002	19	Wanganui River	17_12_19	10_06_20 (run#11)
Potaka 305	Kidnappers	Mangakino		1.00 ± 0.05 (1sd)	40Ar/39Ar, glass-ITPFT	17, 21	D	175.644	-39.9954	15	Rangitikei Valley	17_12_19	10_06_20 (run#11)
Rewa 304	Ahuroa?	? Mangakino		1.20 ± 0.14 Ma (1sd)	glass-ITPFT	15, 16, 20, 21	D	175.631	-39.9912	15	Rangitikei Valley	17_12_19	11_06_20 (run#12)
Mangapipi 510	?Unit B ig	Mangakino		1.51 ± 0.16 Ma (1sd)	glass-ITPFT	15, 16, 20, 21	D	175.343	-39.919	18	Turakina	17_12_19	11_06_20 (run#12)
Pakihikura 303	?Ngaroma	Mangakino		1.58 ± 0.16 Ma (1sd)	glass-ITPFT	15, 20, 21	D	175.355	-39.9142	18	Turakina	17_12_19	11_06_20 (run#12)
Birdgrove 511		Unknown		1.6 Ma	Astronomical	15	D	175.356	-39.9133	18	Turakina	17_12_19	11_06_20 (run#13)
Mangahou 302		Unknown		1.63 Ma	Astronomical	15	D	175.372	-39.9094	15	Rangitikei Valley	17_12_19	11_06_20 (run#13)
Ototoka 521		Unknown		1.72 ± 0.32 Ma (1sd)	glass-ITPFT	15, 21	D	174.84	-39.8696	19	Ototoka Beach	18_12_19	11_06_20 (run#13)
Hikuroa Pumice memberª		Unknown		2.0 ± 0.6 Ma	zircon-ITPFT	18	D	176.827	-39.2437	20	Darkys Spur
* JLH previously unpublished data ; ª Data published in Hopkins and Seward 2020; both analysed by same methodologies as detailed in this research; co-ordintes published as long/lat in decimal degrees using WGS84
Age references
1. Hogg et al., 2003	6. Vandergoes et al., 2013	11. Bussell and Pillans 1997		16. Rees et al., 2019	21. Rees et al., 2020
2. Hogg et al., 2012	7. Nairn 2002	12. Bussell 1986		17. Houghton et al., 1995
3. Hogg et al., 2019	8. Howorth 1975	13. Pillans 1994		18. Hopkins and Seward 2019
4. Lowe et al., 2013	9. Danišík et al., 2020	14. Pillans 1996		19. Peti et al., 2021
5. Lowe et al., 2019	10. Danisik et al., 2012	15. Pillans et al., 2005		20. Pittari et al., 2021

## Sheet: Table 2
Table 2. Average and standard deviation for all tephra, see SM Table 1 for full dataset.																Table 3. (cont) Average and standard deviation for all tephra, see SM Table 1 for full dataset.																	Table 3. (cont) Average and standard deviation for all tephra, see SM Table 1 for full dataset.
Tephra name		SiO2 (wt%)	TiO2 (wt%)	Al2O3 (wt%)	FeOt (wt%)	MnO (wt%)	MgO (wt%)	CaO (wt%)	Na2O (wt%)	K2O (wt%)	Cl (wt%)	H2OD*	SiO2/K2O	Na2O + K2O		Tephra name		Sc (ppm)	Ti (ppm)	V (ppm)	Mn (ppm)	Co (ppm)	Cu (ppm)	Zn (ppm)	Ga (ppm)	Rb (ppm)	Sr88 (ppm)	Y (ppm)	Zr90 (ppm)	Nb (ppm)	Mo (ppm)		Tephra name		Cs (ppm)	Ba138 (ppm)	La (ppm)	Ce (ppm)	Pr (ppm)	Nd (ppm)	Sm (ppm)	Eu153 (ppm)	Gd (ppm)	Tb (ppm)	Dy (ppm)	Ho (ppm)	Er (ppm)	Tm (ppm)
Kaharoa	Average	77.8921	0.0890089	12.6678	0.85348	0.0702506	0.0607911	0.621909	3.75389	3.99073	0.168819	3.6752	19.738	7.74462		Kaharoa	Average	10.3175	541.275	1.71857	465.956	0.275714	1.46385	41.2062	14.7088	135.981	45.2801	26.7174	78.2438	8.21563	1.58062		Kaharoa	Average	5.52875	949.428	21.7131	48.0125	5.24491	19.785	4.16188	0.595625	3.83438	0.639137	4.35683	0.908944	2.79937	0.461313
n=24 (16)	stdev	0.181456	0.0451138	0.160948	0.0894997	0.0212279	0.0262678	0.184303	0.177577	0.391074	0.0286188	1.48042	2.34796	0.395943		n=24 (16)	stdev	2.43286	170.311	1.04926	72.8515	0.167293	1.3193	11.0993	3.14524	37.9972	20.0899	5.95375	19.4991	1.93698	0.648984		n=24 (16)	stdev	1.83535	215.319	3.73208	8.0447	0.869578	3.36799	1.32799	0.211312	0.922496	0.154095	1.21308	0.296936	0.769688	0.171196
Taupo Y5	Average	76.0275	0.235864	13.1592	1.83266	0.098356	0.18296	1.39555	4.05367	3.01427	0.182107	2.51363	25.3404	7.06794		Taupo Y5	Average	12.599	1175.05	1.272	531.055	0.667	2.8549	49.325	13.729	110.455	111.095	24.182	162.455	7.168	1.0715		Taupo Y5	Average	6.0715	600.6	21.329	45.421	5.252	20.4405	4.2385	0.91595	4.309	0.6594	4.2125	0.8571	2.717	0.402
n=33 (20)	stdev	1.09756	0.0633542	0.404808	0.344213	0.0306147	0.0631058	0.208333	0.314268	0.228197	0.0301518	1.81921	1.63521	0.270408		n=33 (20)	stdev	3.65309	447.65	0.873671	210.085	0.716594	4.07784	15.2695	3.40776	29.996	30.1753	7.16116	59.8134	1.96919	0.300145		n=33 (20)	stdev	1.69297	140.886	5.37012	11.5878	1.4516	5.65269	1.21858	0.30724	1.27989	0.214765	1.43067	0.290492	0.828957	0.136589
Waimihia K3	Average	76.2016	0.210991	13.1541	1.82661	0.100088	0.149488	1.33342	4.10772	2.91597	0.179991	2.61038	26.1913	7.02368		Waimihia K3	Average	14.0853	1165.74	0.823684	728.895	0.405474	3.32316	72.8632	17.3542	102.842	112.7	29.5979	208.047	8.42842	1.26174		Waimihia K3	Average	5.38421	628.495	25.18	59.7895	6.38842	25.3716	5.22368	1.16789	4.98316	0.820684	4.98895	1.09184	3.20211	0.513684
n=22 (19)	stdev	0.557269	0.0280648	0.235695	0.188236	0.0258194	0.0222395	0.132262	0.260234	0.144367	0.0201668	1.53365	1.27188	0.294439		n=22 (19)	stdev	2.0374	220.891	0.516637	154.693	0.0828884	2.48923	24.0838	3.13948	18.6677	19.0782	4.63663	28.6569	1.81854	0.206362		n=22 (19)	stdev	1.36986	125.323	4.13706	9.77275	0.981316	5.16082	1.05116	0.174374	0.894502	0.180638	0.89215	0.183368	0.481093	0.10591
Unit K	Average	76.2538	0.199959	13.1393	1.77403	0.07937	0.140096	1.30546	4.11869	2.98927	0.14295	1.26984	25.5358	7.10796		Unit K	Average	7.28111	1201.83	0.777059	606.389	0.673529	3.124	57.3875	17.2672	111.628	117.572	33.3722	221.628	9.105	1.67944		Unit K	Average	6.35722	661.833	26.7278	57.0667	6.48944	26.3056	5.87667	1.14444	5.72167	0.863889	5.70167	1.20333	3.47	0.501778
n=23 (18)	stdev	0.299629	0.0155598	0.124968	0.131286	0.0145397	0.0310174	0.112227	0.0863131	0.104518	0.0117208	0.963619	0.807118	0.147004		n=23 (18)	stdev	0.784098	118.075	0.160731	45.9938	0.123892	2.66247	15.5062	1.85264	12.4836	12.2498	3.05918	18.6623	0.927845	0.516805		n=23 (18)	stdev	1.35047	60.2292	2.3711	5.30948	0.72091	3.32998	0.757962	0.125146	0.839483	0.110727	0.528374	0.141795	0.396113	0.0647888
Whakatane K5	Average	78.3047	0.108128	12.4929	0.838509	0.0384417	0.0984146	0.689422	3.58339	3.84606	0.160658	1.96755	20.3716	7.42944		Whakatane K5	Average																Whakatane K5	Average
n=21 (0)	stdev	0.182335	0.0172716	0.0791753	0.0531155	0.017754	0.0121166	0.0393546	0.132409	0.0927439	0.0158454	1.48516	0.517236	0.179537		n=21 (0)	stdev																n=21 (0)	stdev
Whakatane - P	Average	77.4187	0.169479	12.722	1.44287	0.0603746	0.121448	1.01723	3.77194	3.27598	0.155958	1.83348	23.8577	7.04792		Whakatane - P	Average	6.68895	995.526	0.775455	542.368	0.520667	2.91667	42.8625	17.1842	122.789	82.7316	31.9789	179.737	8.96947	1.71118		Whakatane - P	Average	8.79278	725.421	27.3984	56.7632	6.52842	25.5526	5.21947	0.942632	5.38444	0.863	5.23737	1.18368	3.28158	0.508211
n=24 (19)	stdev	0.632422	0.0427414	0.227988	0.352623	0.0223617	0.0304879	0.212242	0.194577	0.350742	0.0142406	1.75278	2.20318	0.246709		n=24 (19)	stdev	1.94056	256.706	0.23964	102.634	0.178384	1.70215	20.1593	3.12628	25.5334	24.4328	8.46441	67.7297	1.42538	0.439629		n=24 (19)	stdev	1.58478	143.592	5.09036	11.083	1.2686	5.61727	1.51667	0.286412	1.76252	0.337933	1.57053	0.306362	0.995089	0.181085
Tuhua K6	Average	74.4444	0.296757	9.6996	5.79892	0.116347	0.00673872	0.269397	5.17707	4.19071	0.225229	0.953308	17.7897	9.36778		Tuhua K6	Average	3.26211	1823.68	0.481667	1196.47	0.2652	5.635	244.263	48.5421	153.842	3.13105	147.632	1340.53	116.447	12.0421		Tuhua K6	Average	6.16105	15.6118	94.9368	203.158	24.1263	97.2263	22.5	2.11789	23.9842	3.84684	25.9316	5.42947	16.0053	2.51737
n=19 (19)	stdev	0.30831	0.0201915	0.137424	0.148588	0.0188077	0.00934504	0.0154539	0.175994	0.155485	0.0145505	0.51522	0.732455	0.210552		n=19 (19)	stdev	0.556972	260.111	0.349824	177.3	0.286326	4.40663	71.0476	7.85899	24.692	3.6302	24.4908	217.906	18.9827	2.21994		n=19 (19)	stdev	1.37618	2.67228	15.1045	32.752	4.02228	15.9072	3.47994	0.279416	4.07107	0.641821	3.9199	0.816847	2.41695	0.4293
Mamaku K7	Average	78.2869	0.115948	12.5745	0.877043	0.0410842	0.109506	0.791353	3.61031	3.59342	0.155631	2.14273	21.8181	7.20373		Mamaku K7	Average	4.38652	755	1.12957	435.652	0.490091	2.75632	28.1087	15.0696	126.648	64.9609	25.9043	99.3696	8.65435	2.23957		Mamaku K7	Average	6.8787	958.565	26.4652	53.5435	6.10652	21.8652	3.84478	0.72913	3.8713	0.635957	4.18304	0.853652	2.69435	0.397652
n=23 (23)	stdev	0.179452	0.0199853	0.154928	0.0517966	0.0163753	0.0168075	0.0625969	0.113412	0.134904	0.0133349	1.54329	0.889571	0.190545		n=23 (23)	stdev	0.796827	132.956	0.258008	64.8688	0.0968464	1.94892	7.3243	2.23311	20.0241	10.2152	3.492	16.9959	1.28104	0.952158		n=23 (23)	stdev	1.3373	159.372	3.39245	6.99992	0.939001	2.63708	0.607647	0.17689	0.980057	0.182188	0.811527	0.141272	0.389881	0.100093
Rotoma - P	Average	78.1945	0.111931	12.5362	0.888785	0.0368903	0.106146	0.726892	3.65799	3.74071	0.153796	0.678683	20.9316	7.39871		Rotoma - P	Average																Rotoma - P	Average
n=24 (0)	stdev	0.167076	0.0140403	0.0943807	0.0763052	0.0186022	0.0115756	0.0304578	0.104832	0.137132	0.014254	0.657978	0.798084	0.148198		n=24 (0)	stdev																n=24 (0)	stdev
Rotoma - K8 - D	Average	78.2118	0.121508	12.5854	0.87426	0.0507718	0.126611	0.842508	3.73471	3.45245	0.150817	0.826229	22.7475	7.18717		Rotoma - K8 - D	Average	4.075	776.3	1.271	464.25	0.445	1.24824	37.85	14.03	115.215	71.59	27.06	96.945	8.8445	1.8055		Rotoma - K8 - D	Average	5.6785	939.85	26.115	54.69	6.223	23.815	4.542	0.8235	4.1465	0.661	4.174	0.9215	2.901	0.4201
n=23 (20)	stdev	0.180301	0.0145741	0.0808572	0.0520552	0.0146882	0.0161182	0.0670791	0.1303	0.241224	0.0136843	0.786102	1.40573	0.188261		n=23 (20)	stdev	0.440341	78.8657	0.270903	37.4051	0.105905	0.422984	7.1689	1.18637	13.3008	6.32122	2.40337	9.70938	0.94732	0.250336		n=23 (20)	stdev	0.614228	88.2737	2.22504	4.97128	0.714483	2.52717	0.507051	0.13484	1.62698	0.0906061	0.50379	0.108301	0.450168	0.0736713
Opepe K9	Average	75.9354	0.214964	13.4668	1.84771	0.0735937	0.183475	1.69408	3.75159	2.83237	0.167192	4.18874	26.8606	6.58396		Opepe K9	Average	8.0225	1364.25	4.005	528.875	1.7025	6.13	43.7375	18.6112	122.713	130.012	32.975	234.062	8.82125	1.93875		Opepe K9	Average	8.13375	674.125	26.1	56.425	6.38375	25.55	5.15	1.05	5.78125	0.85525	5.20375	1.08875	3.56625	0.48525
n=13 (8)	stdev	0.337926	0.0153341	0.155011	0.0452718	0.0280795	0.0258311	0.0883937	0.149382	0.121834	0.0142927	1.41858	1.28333	0.242188		n=13 (8)	stdev	0.310104	130.98	2.00631	66.4475	0.208035	3.92297	13.7652	1.7565	11.6604	12.8772	3.00131	20.6682	0.570099	0.333913		n=13 (8)	stdev	1.16022	66.2537	3.07525	5.71733	0.635339	2.65384	0.645623	0.0781939	1.17352	0.108354	0.273127	0.166856	0.411337	0.107784
Poronui K10	Average	76.4454	0.211119	13.1759	1.64243	0.0675683	0.156367	1.52852	3.75451	3.01817	0.140098	1.4564	25.3935	6.77268		Poronui K10	Average	8.02286	1308.43	2.85929	466.071	1.60857	4.19364	46.8	17.2421	126.979	119.071	33.15	231.462	9.21929	1.85077		Poronui K10	Average	7.50143	742.786	28.2786	58.1714	6.67571	26.9429	5.46286	0.977857	6.93357	0.902857	5.66286	1.255	3.54571	0.574857
n=18 (14)	stdev	0.491057	0.0759415	0.211979	0.223693	0.026789	0.0354854	0.141388	0.113222	0.155866	0.0162809	1.47464	1.35252	0.184058		n=18 (14)	stdev	1.56576	258.854	1.03651	95.1707	0.352657	2.04839	15.9989	2.76904	24.177	19.5253	6.73952	34.4132	1.93498	0.265376		n=18 (14)	stdev	1.24359	159.437	5.88508	11.4282	1.36104	6.28021	1.28986	0.185065	1.5589	0.187716	1.22087	0.232271	0.854704	0.140196
Karapiti K11	Average	76.6063	0.185159	13.1259	1.58092	0.0578393	0.141269	1.4805	3.66582	3.15627	0.144564	1.84317	24.4801	6.82209		Karapiti K11	Average	7.05455	1161.73	2.60091	394.727	1.56636	2.93222	44.0545	16.2818	108.827	112.091	30.5909	208.991	8.41455	1.73091		Karapiti K11	Average	7.99182	688.364	25.8455	55.1545	6.03273	25.3909	5.18909	1	5.48091	0.784	5.18	1.06909	4.77727	0.529364
n=25 (11)	stdev	0.259035	0.0192303	0.106575	0.161431	0.0226283	0.0248664	0.139915	0.183703	0.359049	0.0161869	1.27166	1.93854	0.22858		n=25 (11)	stdev	1.31655	242.164	0.841742	79.2806	0.408834	2.02427	11.004	2.80208	18.891	14.5932	5.49208	38.6846	1.61623	0.383783		n=25 (11)	stdev	1.85646	135.442	4.60812	9.68456	1.11082	4.93973	1.03255	0.146833	1.24757	0.151364	1.07188	0.202754	0.975634	0.112425
Waiohau - P	Average	78.0216	0.116316	12.5258	0.96	0.0589474	0.135263	0.842632	3.88632	3.31421	0.138421	3.01053	23.5839	7.20053		Waiohau - P	Average	13.3579	651.632	1.61941	442.979	0.366923	0.95875	39.1211	14.1789	110.479	69.3263	21.4921	83.5895	7.70632	2.08667		Waiohau - P	Average	4.77105	860.105	22.5121	47.5	5.04263	19.4158	4.11526	0.683158	3.53158	0.576842	3.73737	0.776579	2.34211	0.375684
n=19 (19)	stdev	0.274515	0.0245426	0.260903	0.1253	0.0128646	0.0263246	0.0688672	0.191521	0.14033	0.0271341	2.3255	1.05922	0.233535		n=19 (19)	stdev	2.47124	55.9575	0.952605	14.0702	0.234357	0.497056	6.27265	2.0433	5.19343	4.8695	1.61661	7.94627	0.301519	1.28889		n=19 (19)	stdev	0.503619	48.5282	1.40708	2.77028	0.362228	1.5356	0.605937	0.198076	0.582096	0.119353	0.497436	0.124091	0.263809	0.0609198
Waiohau - K14b D	Average	78.122	0.124	12.394	1.029	0.051	0.162	0.884	3.871	3.225	0.14	1.023	24.2405	7.096		Waiohau - K14b D	Average	16.98	760.4	1.883	405.64	0.51875	1.49778	39.34	12.5	112.12	77.91	21.516	93.39	7.745	2.05556		Waiohau - K14b D	Average	4.531	861	22.424	47.624	5.102	19.636	3.759	0.807	3.165	0.547	3.72	0.709	2.398	0.3087
n=10 (10)	stdev	0.262035	0.017127	0.167279	0.0495424	0.0191195	0.0147573	0.0291357	0.256491	0.0857969	0.024037	1.02118	0.699326	0.269287		n=10 (10)	stdev	1.93552	27.7777	0.80987	16.7229	0.310642	0.55495	8.07234	0.876863	2.92225	2.40252	0.897976	1.53221	0.359235	1.04894		n=10 (10)	stdev	0.222932	18.4029	0.721529	0.987018	0.251741	0.728822	0.684405	0.24998	0.583957	0.117856	0.429754	0.101154	0.229966	0.0502506
Rotorua - P	Average	77.5656	0.141111	12.5585	1.16037	0.0507407	0.146296	1.03	3.72519	3.47074	0.147778	4.3	22.699	7.19593		Rotorua - P	Average	13.64	939.08	3.39913	425.792	0.655909	1.51571	46.704	14.108	115.776	80.5172	22.8664	130.488	7.9832	3.385		Rotorua - P	Average	5.1728	816.952	23.0448	48.33	5.154	19.736	3.954	0.7028	3.526	0.6264	3.9732	0.85072	2.4036	0.397
n=27 (25)	stdev	0.592552	0.0625935	0.281803	0.217229	0.0201773	0.0734924	0.320924	0.304206	0.464608	0.0390595	1.97408	2.733	0.402131		n=27 (25)	stdev	2.85526	354.26	2.02413	66.3654	0.39494	0.597173	9.56179	2.07804	17.1062	32.4754	5.00876	37.9369	0.903681	2.2015		n=27 (25)	stdev	1.06182	38.3618	3.26014	7.37612	0.848052	3.31045	1.13384	0.297385	1.01797	0.227301	1.06394	0.199301	0.685911	0.112863
Rotorua -K15 D	Average	77.536	0.079	12.524	0.911	0.06	0.088	0.733	3.803	4.128	0.135	0.636	19.013	7.931		Rotorua -K15 D	Average	17.15	492.5	1.7075	493.875	0.555	2.14875	32.725	12.825	148.575	48.85	21.4363	78.7375	8.405	2.2625		Rotorua -K15 D	Average	7.22875	830.125	26.3187	54.06	5.51	19.0875	3.5	0.5075	3.05	0.5075	3.435	0.72925	2.2025	0.34325
n=10 (8)	stdev	0.347345	0.0513052	0.194548	0.152348	0.0105409	0.0666333	0.205375	0.229495	0.428481	0.0164992	0.629642	2.46939	0.335177		n=10 (8)	stdev	1.8095	244.345	1.377	33.9303	0.30244	0.490173	9.49267	0.856488	20.7028	26.5659	1.60422	34.2548	0.656266	1.17344		n=10 (8)	stdev	1.24938	33.3014	2.48106	4.72924	0.569561	1.63133	0.488321	0.259656	0.530848	0.106603	0.549311	0.0441645	0.342251	0.0812944
Rerewhakaaitu - P	Average	78.0155	0.093	12.341	0.9955	0.0485	0.096	0.7715	3.6135	3.8725	0.1525	2.8095	20.3541	7.486		Rerewhakaaitu - P	Average	13.9889	697.556	2.51778	385.472	0.680909	2.75412	35.4611	13.5611	136.461	63.8778	22.3117	83.0111	7.71444	3.06667		Rerewhakaaitu - P	Average	6.03278	786.667	24.2122	50.5278	5.26278	19.6161	4.10333	0.604706	3.31778	0.473333	3.58167	0.808	2.34	0.377
n=20 (18)	stdev	0.26003	0.0217885	0.206344	0.0917935	0.0195408	0.0320197	0.105245	0.262624	0.380925	0.0305864	1.62995	2.23643	0.250313		n=20 (18)	stdev	2.68742	448.244	3.39602	69.6206	0.397906	3.49349	9.82477	2.73671	16.0925	44.9637	7.12793	21.1104	1.13882	1.49507		n=20 (18)	stdev	0.914818	47.0069	3.15951	7.57657	0.926929	5.21441	1.50417	0.18772	1.1233	0.223106	1.35013	0.335456	0.809088	0.140458
Rerewhakaaitu -K17 D	Average	77.6645	0.0818182	12.5709	0.943636	0.0527273	0.0954545	0.788182	3.70818	3.94	0.152727	3.30909	19.8737	7.64818		Rerewhakaaitu -K17 D	Average	17.2778	496.111	1.42222	465.367	0.628571	1.68556	35.7556	13.6111	138.311	58.6444	19.0922	75.6111	7.57556	1.7		Rerewhakaaitu -K17 D	Average	6.79444	830.111	24.7033	50.5133	4.99889	18.3722	2.82667	0.432222	2.82333	0.47	2.97	0.660222	2.10333	0.356556
n=11 (9)	stdev	0.300145	0.0231595	0.290464	0.0678635	0.0173729	0.0229624	0.0604679	0.294375	0.355021	0.0200454	1.97617	1.99342	0.431203		n=11 (9)	stdev	1.65739	126.247	1.11617	15.7372	0.266798	0.514541	7.8959	0.98545	13.8823	12.6889	2.37489	12.9888	0.496264	0.580948		n=11 (9)	stdev	0.915671	41.906	1.13028	2.07017	0.259203	2.26376	0.742917	0.303017	0.373062	0.147902	0.572232	0.139321	0.326688	0.0569454
Okareka	Average	78.4787	0.138001	12.5968	0.874671	0.0614247	0.122768	0.914617	3.57482	3.23822	0.196506	4.92784	24.3068	6.81304		Okareka	Average	5.21091	885.455	2.71955	453.5	0.798636	5.11056	24.8684	14.8727	113.345	68.7409	22.4091	99.9818	8.57727	1.91682		Okareka	Average	4.78364	1035.64	25.6409	51.1136	5.78591	19.4818	3.72318	0.551364	3.63591	0.535091	3.32864	0.745455	2.93182	0.366318
n=22 (22)	stdev	0.20047	0.0164559	0.110905	0.0622518	0.0206046	0.0161258	0.0172415	0.109209	0.183791	0.018604	0.728775	1.32915	0.206697		n=22 (22)	stdev	0.971827	99.9965	0.493679	44.3243	0.180008	5.17126	7.59086	1.64843	11.6933	7.36405	2.60492	11.4019	0.752502	0.389204		n=22 (22)	stdev	0.636984	108.184	2.80674	4.95333	0.693491	1.81019	0.545461	0.120289	0.593181	0.0960466	0.449426	0.122619	1.12165	0.0716814
Te Rere	Average	78.1026	0.0932497	12.4021	1.05246	0.0639461	0.0578898	0.638879	3.61672	3.9721	0.215554	3.8016	19.7326	7.58881		Te Rere	Average	5.864	698.2	1.5625	367	0.7455	3.13765	41.545	17.19	139.195	34.22	37.93	123.18	11.1125	2.318		Te Rere	Average	7.407	785.25	30.875	66.505	7.7115	28.94	6.087	0.6062	5.865	0.972	6.1355	1.259	4.5125	0.6408
n=24 (20)	stdev	0.177249	0.0164713	0.102688	0.0820253	0.0282475	0.0184992	0.0930924	0.164564	0.243247	0.0249517	1.17952	1.19387	0.209344		n=24 (20)	stdev	1.6804	149.717	2.05264	61.9694	0.689275	1.83192	10.8137	2.7067	28.2389	8.81462	6.8539	18.5615	1.90082	0.313463		n=24 (20)	stdev	1.1423	111.232	4.79966	11.1605	1.63863	4.83468	1.13554	0.113399	1.10242	0.156259	1.10083	0.21121	1.90399	0.158054
Kawakawa/Oruanui	Average	77.7746	0.164445	12.7406	1.26008	0.0541238	0.133414	1.23353	3.46091	3.17824	0.170555	5.06773	24.6428	6.63915		Kawakawa/Oruanui	Average	4.92571	984.667	3.23048	405.81	1.23857	6.156	31.681	15.6067	123.69	94.5714	23.2571	144.4	7.54238	1.78476		Kawakawa/Oruanui	Average	7.46952	653.143	22.9524	45.7	5.03714	18.7095	3.70524	0.62681	3.60095	0.596095	3.63667	0.755238	2.39857	0.37681
n=24 (21)	stdev	0.634485	0.0517258	0.300387	0.148028	0.0257084	0.0443774	0.206444	0.124345	0.291113	0.0213019	0.862415	1.97865	0.217871		n=24 (21)	stdev	1.42187	205.464	3.14767	78.9719	0.517458	8.01573	10.3691	2.17705	16.4851	17.94	3.26214	31.7034	1.04502	0.415724		n=24 (21)	stdev	1.44458	77.4004	2.94561	5.84979	0.642901	2.82399	0.761161	0.17545	0.730472	0.112284	0.61333	0.114264	0.708663	0.0764445
Poihipi	Average	78.0585	0.120739	12.5369	0.960707	0.07061	0.0891786	0.898086	3.59804	3.66722	0.157945	2.00214	21.5567	7.26526		Poihipi	Average	4.10438	803	1.44867	443.875	0.601875	2.385	32.4188	14.8875	134.25	71.3063	24.9125	105.375	9.12125	1.99188		Poihipi	Average	6.9275	896	27.225	53.3875	5.96625	21.9563	4.34938	0.65375	3.67188	0.598625	3.79312	0.845	2.45812	0.397875
n=19 (16)	stdev	0.236034	0.02558	0.127982	0.172322	0.0236821	0.0239196	0.116101	0.148	0.418907	0.0218937	1.88149	2.52366	0.370347		n=19 (16)	stdev	0.949442	146.813	0.454955	49.4029	0.295685	1.40232	9.83221	1.55772	23.6291	13.6491	3.55994	22.8207	1.03931	0.278788		n=19 (16)	stdev	1.47976	97.6914	3.39028	5.8615	0.696629	3.20582	0.901055	0.199996	0.831771	0.119324	0.785279	0.160042	0.340044	0.0830156
Okaia	Average	77.7618	0.180821	12.7527	1.29221	0.0648894	0.147831	1.26506	3.45418	3.08055	0.168936	5.00111	25.363	6.53473		Okaia	Average	5.07905	1094	3.68095	413.333	1.38952	4.27368	31.5286	15.2429	127.738	101.59	23.8238	148.667	8.14429	1.82476		Okaia	Average	7.40333	719.524	24.5095	46.2333	5.19571	19.7286	3.96429	0.703333	3.85238	0.57981	3.90952	0.777238	2.47571	0.36881
n=21 (21)	stdev	0.658137	0.0592469	0.269908	0.169555	0.0256211	0.0463505	0.183358	0.180524	0.218648	0.018896	1.01376	1.80168	0.249809		n=21 (21)	stdev	0.806225	314.26	2.39647	74.7384	0.710376	2.74532	9.73664	1.94643	18.0576	18.9049	3.57686	30.1518	1.2372	0.412148		n=21 (21)	stdev	0.988076	90.2467	3.17914	6.04809	0.718168	2.92184	0.784593	0.189798	0.640148	0.126077	0.673242	0.135625	0.491768	0.084842
Unit L	Average	77.7931	0.151377	12.7071	1.18726	0.0600704	0.133557	1.15703	3.65258	3.15788	0.174575	3.22212	24.946	6.81046		Unit L	Average	4.956	1060.85	2.189	468.85	0.897	3.93706	29.625	15.265	116.07	99.98	27.93	148.48	8.5495	1.9225		Unit L	Average	6.261	761.8	25.15	51.24	5.842	22.045	4.5055	0.903	4.336	0.6788	4.3445	0.941	3.056	0.47055
n=22 (20)	stdev	0.316845	0.0299941	0.2899	0.0834373	0.0213609	0.0247369	0.134011	0.282089	0.415801	0.0249861	1.81594	2.52302	0.254054		n=22 (20)	stdev	0.80613	167.379	0.677207	120.816	0.359548	2.21615	9.42616	1.86978	19.732	17.7728	7.77974	14.9897	1.82683	0.422323		n=22 (20)	stdev	1.70162	100.99	3.64121	8.46916	1.21882	5.05189	1.14288	0.28892	1.20382	0.207794	1.50333	0.297585	0.976171	0.128276
Awakeri	Average	77.4163	0.183267	12.969	1.15932	0.0718107	0.179221	1.06625	3.9867	2.96813	0.14732	3.56526	26.0963	6.95484		Awakeri	Average	6.23316	1216.42	1.48368	630.368	0.400526	2.17944	45.8158	17.6632	102.858	106.721	35.2737	163.474	10.8737	2.04737		Awakeri	Average	4.44632	893.842	29.0368	62.8579	7.24316	28.3947	5.95263	1.143	5.59895	0.932632	5.69211	1.17053	3.68211	0.591947
n=21 (19)	stdev	0.22132	0.0149939	0.162165	0.107325	0.0156069	0.0207325	0.0723066	0.129932	0.0718859	0.0223454	1.29324	0.604394	0.129243		n=21 (19)	stdev	1.52411	297.305	0.479435	155.56	0.115302	1.17589	16.5138	3.84696	24.2503	15.5711	7.88556	37.113	2.8327	0.526116		n=21 (19)	stdev	1.3042	205.316	7.11206	14.7192	1.6593	6.02877	1.61729	0.282636	1.51197	0.255513	1.25734	0.299026	0.8679	0.155083
Mangaone	Average	76.7442	0.204328	13.3099	1.24521	0.0796495	0.222236	1.19797	4.13796	2.85852	0.180965	2.55668	26.8668	6.99648		Mangaone	Average	4.96211	1233.47	1.84632	668.947	0.433684	2.08167	33.2789	16.0895	88.0316	117.989	32.8632	172.842	9.54211	1.76368		Mangaone	Average	3.88211	798.737	25.8526	53.1105	6.24263	25.1053	5.23053	1.12526	5.19263	0.805158	5.23	1.091	3.4	0.540842
n=24 (19)	stdev	0.378808	0.0162211	0.178443	0.0849007	0.0223881	0.0246741	0.0753288	0.157976	0.0783727	0.0128685	1.31746	0.746126	0.16294		n=24 (19)	stdev	0.477302	94.4877	0.234786	58.7126	0.0718185	1.34216	10.3672	1.61276	7.10313	10.5612	2.78392	16.2079	0.774995	0.312911		n=24 (19)	stdev	0.786007	47.6956	1.85633	2.93464	0.373301	2.03974	0.574442	0.0911268	0.64277	0.112626	0.632675	0.135856	0.455058	0.0700764
Hauparu	Average	75.197	0.382168	13.7074	1.86436	0.0801451	0.393398	1.77685	3.87338	2.72533	0.146885	3.05338	27.6758	6.59871		Hauparu	Average	6.66182	2263.64	12.1709	632.909	1.77545	3.208	40.44	15.4909	80.3091	146.682	30.1545	237.273	8.96727	1.65545		Hauparu	Average	3.538	759.273	23.5636	46.7727	5.38727	22.4182	4.67909	0.987727	4.35545	0.757727	4.84727	1.00509	3.01273	0.480909
n=21 (11)	stdev	0.904092	0.0475852	0.393015	0.264288	0.0217171	0.0608466	0.209991	0.160583	0.147184	0.0233282	1.56791	1.65856	0.193851		n=21 (11)	stdev	1.11474	248.969	1.92818	65.4438	0.363025	1.7976	19.6644	1.80136	10.4002	18.4335	3.49209	29.3908	0.938041	0.328766		n=21 (11)	stdev	0.607706	69.7224	2.26242	5.46134	0.689044	2.54079	0.891633	0.151878	0.916235	0.105134	0.622802	0.133526	0.393779	0.0787064
Maketu	Average	73.1854	0.508981	14.2544	2.43989	0.0920927	0.566337	2.16557	4.30939	2.47792	0.155898	0.695897	29.5381	6.78731		Maketu	Average	8.8	2890	12.6	940	1.84	2.96	29.5	19.6	79	196	42.4	298	10.8	1.96		Maketu	Average	2.66	782	27.4	51.8	5.97	29	6.14	1.45	6.15	1.05	7.6	1.33	4.2	0.76
n=2 (1)	stdev	0.34416	0.0628445	0.0333935	0.218641	0.00880162	0.0832838	0.156367	0.232052	0.0304888	0.0440841	0.893768	0.502333	0.201564		n=2 (1)	stdev																n=2 (1)	stdev
Nga Motu	Average	75.627	0.345498	13.7305	1.55818	0.0856496	0.369763	1.76689	3.88948	2.62705	0.145072	3.48519	28.9479	6.51653		Nga Motu	Average	4.70421	2065.32	16.7679	645.526	3.20947	6.27294	42.5	15.9884	71.9789	188.558	23.4721	179.079	7.85368	1.79526		Nga Motu	Average	2.62368	732.105	20.3147	43.4505	4.81053	19.7868	4.08	0.929474	3.87421	0.618947	3.78316	0.780105	2.50316	0.380421
n=20 (19)	stdev	1.0852	0.0797717	0.524624	0.338013	0.023866	0.15547	0.351336	0.21292	0.220872	0.0168643	2.13174	2.02311	0.347531		n=20 (19)	stdev	0.628864	795.666	26.7247	87.86	6.02694	11.7839	14.8784	2.96834	17.106	107.368	5.3921	29.6243	0.925216	0.425563		n=20 (19)	stdev	0.606101	164.121	3.76475	8.31219	0.923168	3.64248	0.746481	0.113357	0.887163	0.133176	0.839517	0.160991	0.570312	0.105482
Tahuna	Average	78.1531	0.130741	12.4974	0.954046	0.0446127	0.124081	0.855187	3.4866	3.7542	0.182627	3.8438	21.0643	7.2408		Tahuna	Average	4.05118	895.471	2.60647	442.176	1.03118	3.62118	25.9412	18.1529	136.165	61.4706	21.0353	101.782	8.42	2.14941		Tahuna	Average	7.92412	922.706	26.4353	50.8235	5.30529	18.4529	3.41529	0.497706	3.11294	0.481824	3.05706	0.671176	2.18118	0.341706
n=23 (17)	stdev	0.310438	0.0239343	0.189391	0.0676498	0.0216629	0.0316846	0.104216	0.280846	0.407838	0.0187145	0.692111	2.38042	0.259607		n=23 (17)	stdev	0.608799	146.064	0.906993	86.6727	0.35201	1.65346	7.41401	7.00822	38.1246	10.3949	3.12509	18.2868	1.07489	0.712956		n=23 (17)	stdev	3.11097	103.016	3.34812	7.04765	0.876685	2.71042	0.824433	0.109494	0.494934	0.10286	0.585585	0.148487	0.507702	0.0627871
Earthquake Flat Ig	Average	77.8808	0.10938	12.4823	0.951841	0.0287	0.101729	0.792663	3.22584	4.42671	0.205937	3.83416	17.6051	7.65255		Earthquake Flat Ig	Average	4.13909	884.091	2.4	489.545	0.838182	2.13636	19.6091	15.8273	121.664	64.9273	20.5	93.0727	8.94182	2.04182		Earthquake Flat Ig	Average	4.86636	1053.27	26.0273	51.7364	5.57909	19.4182	3.65727	0.534455	3.05	0.527727	3.08333	0.608182	2.07909	0.319273
n=24 (11)	stdev	0.201604	0.0208339	0.0811872	0.0888863	0.0128771	0.0148074	0.0287745	0.109101	0.114379	0.0297087	0.710506	0.473862	0.14477		n=24 (11)	stdev	0.425828	65.5507	0.503944	38.2397	0.165881	1.01345	2.99648	1.45402	30.5846	5.55933	2.10286	7.86919	0.899086	0.433286		n=24 (11)	stdev	1.73507	80.0613	2.69262	3.72002	0.551225	1.49454	0.50717	0.116706	0.474299	0.0934174	0.462115	0.105339	0.440555	0.107775
Rotoehu tephra	Average	78.3026	0.141317	12.5542	0.91341	0.0478116	0.133344	0.826574	3.66266	3.41805	0.162494	3.57375	22.9202	7.08071		Rotoehu tephra	Average	4.33286	1109.43	3.84071	536.071	0.943571	2.74545	32.4071	14.8786	100.479	82.4429	22.2714	112.507	8.73357	1.88143		Rotoehu tephra	Average	3.64429	1056.36	25.5786	51.8071	5.54357	20.5571	3.805	0.657143	3.63	0.577143	3.60286	0.767857	2.21286	0.378429
n=21 (14)	stdev	0.180003	0.0166549	0.0559921	0.0489671	0.0165946	0.013009	0.0265549	0.143918	0.078879	0.0144478	0.801579	0.534864	0.146264		n=21 (14)	stdev	0.621195	563.747	3.5017	141.153	0.304166	0.992163	9.50461	2.15199	11.913	48.794	3.42736	46.8105	0.797965	0.464342		n=21 (14)	stdev	0.820869	121.369	2.74624	5.99839	0.624138	2.09751	0.428912	0.246309	0.764692	0.108516	0.65091	0.150904	0.451177	0.087317
Rotoiti Ig	Average	78.2815	0.141237	12.5608	0.902653	0.0531632	0.133271	0.876219	3.69117	3.36002	0.197442	4.2272	23.323	7.05119		Rotoiti Ig	Average	4.10813	878.75	2.99187	452.562	0.838125	3.44222	25.4167	14.475	104.45	64.75	19.8625	90.4188	8.38875	1.73187		Rotoiti Ig	Average	3.71813	1066.06	25.225	49.9875	5.185	19.5375	3.6575	0.515	3.06687	0.45825	3.04062	0.6425	1.9575	0.297187
n=19 (16)	stdev	0.15388	0.0169744	0.132753	0.0885227	0.0256903	0.0260424	0.042926	0.179099	0.112303	0.0274036	1.13771	0.794186	0.163513		n=19 (16)	stdev	0.477455	86.9088	2.58623	50.9077	0.284704	2.09588	8.15317	2.00582	16.6683	7.036	2.56382	10.5255	1.05073	0.380652		n=19 (16)	stdev	0.582629	129.584	3.25689	5.41022	0.762216	3.14089	0.642054	0.14922	0.803034	0.0740716	0.32575	0.114688	0.341047	0.0623519
Ararata Gully 318	Average	77.2424	0.152892	12.8348	1.28797	0.0261807	0.133445	1.03484	3.63867	3.6488	0.165538	5.60651	21.1808	7.28747		Ararata Gully 318	Average	5.418	944.6	2.77333	414.667	0.969333	10.2053	28.74	18.0733	144.473	84.9133	25.9933	147.467	9.62133	3.79933		Ararata Gully 318	Average	7.962	828.6	28.28	58.38	6.24933	23.9267	4.272	0.578067	4.07667	0.6024	4.25667	0.848	2.53267	0.399267
n=24 (15)	stdev	0.701956	0.0400725	0.298015	0.188134	0.0136611	0.046171	0.171668	0.0866942	0.0923068	0.0181252	0.789167	0.513745	0.0900339		n=24 (15)	stdev	0.67245	258.759	2.69298	52.8457	0.658401	13.678	8.82009	2.15654	17.0156	19.0969	2.19528	28.725	0.982481	2.0967		n=24 (15)	stdev	1.15198	91.1731	2.42846	4.73304	0.646479	2.93074	0.613505	0.164631	0.720612	0.0777907	0.527699	0.101784	0.262147	0.0635829
Kakariki 272	Average	78.1034	0.128689	12.5015	0.980326	0.0213877	0.11157	0.908353	3.50346	3.74128	0.163883	4.99208	20.9057	7.24474		Kakariki 272	Average	4.42556	848.278	4.13667	366.278	1.29167	17.956	28.1611	17.3	132.983	77.8278	21.9333	107.328	8.51778	2.58889		Kakariki 272	Average	5.68389	877.889	25.25	50.1167	5.42167	19.7722	3.99333	0.645	3.38944	0.546778	3.47833	0.72	2.22111	0.365
n=25 (18)	stdev	0.12539	0.0199523	0.0724562	0.0983062	0.0152475	0.0167228	0.0427497	0.0925204	0.143512	0.0149076	0.378448	0.804463	0.117671		n=25 (18)	stdev	0.58769	145.975	4.56439	40.1187	0.967977	21.9694	7.58932	2.94099	20.4767	7.75468	2.53215	11.3209	0.811016	0.875764		n=25 (18)	stdev	0.860671	246.271	3.03436	4.7494	0.593616	2.60538	0.623425	0.125522	0.578064	0.110057	0.544386	0.11024	0.374557	0.0730898
Fordell 449	Average	78.0175	0.109577	12.3733	1.06785	0.024471	0.0671139	0.637442	3.73511	3.96757	0.204186	5.15734	19.7037	7.70269		Fordell 449	Average	6.68053	742.526	3.78222	428.105	0.670526	15.0044	47.7842	18.4158	162.211	41.0895	39.2737	135.263	11.7974	2.03632		Fordell 449	Average	8.59737	884.474	33.7368	71.1211	8.20842	31.0737	6.53211	0.747947	6.37789	1.05053	6.69368	1.34579	3.93421	0.622105
n=25 (19)	stdev	0.441668	0.036543	0.193512	0.252318	0.0138124	0.0598273	0.155309	0.125242	0.182378	0.0241186	0.588892	0.915031	0.172719		n=25 (19)	stdev	1.24098	174.369	3.81432	85.8273	0.373266	22.7102	10.4942	3.86986	36.5629	11.9648	8.71167	30.2395	2.66877	0.780237		n=25 (19)	stdev	2.19754	189.279	7.59212	15.6821	1.8493	6.76082	1.52543	0.279962	1.43842	0.244982	1.98357	0.315283	0.909629	0.18244
Upper Griffin Road 307	Average	77.5384	0.173875	12.5306	1.44316	0.0276455	0.114806	1.01121	3.69107	3.46928	0.192044	5.45668	22.3665	7.16034		Upper Griffin Road 307	Average	5.83588	1106.65	2.50813	394.353	1.04741	5.51875	50.8647	16.1371	132.024	75.7176	35.2194	154.018	9.15529	1.86882		Upper Griffin Road 307	Average	7.66471	657.588	29.2529	57.3294	6.81706	24.7706	4.72412	0.862353	5.03588	0.818059	5.22529	1.23294	3.63765	0.526176
n=21 (17)	stdev	0.189049	0.0171377	0.0948776	0.0999348	0.0164343	0.0179704	0.04126	0.114527	0.097763	0.0167033	0.466854	0.619268	0.123652		n=21 (17)	stdev	2.12225	233.897	2.51303	43.4021	0.283675	5.88657	8.35306	1.84432	15.7085	10.9479	7.56129	8.35099	1.18519	0.320953		n=21 (17)	stdev	0.75539	52.882	6.79836	4.18013	0.749473	2.73902	0.804255	0.111273	1.38186	0.0925598	1.37092	0.14025	0.380732	0.0794247
Lower Griffin Road 309	Average	76.4919	0.282823	13.1816	1.29705	0.0310438	0.284796	1.39259	3.72072	3.31744	0.171381	5.14125	23.0575	7.03816		Lower Griffin Road 309	Average	4.9435	1607.1	10.1565	491.8	1.1275	8.8	44.515	16.0435	114.655	116.515	23.95	186.515	7.752	2.019		Lower Griffin Road 309	Average	5.484	711.3	23.1975	45.01	4.882	18.258	3.689	0.87105	3.5645	0.56795	3.9495	0.7942	2.4225	0.3695
n=25 (20)	stdev	0.616205	0.0506645	0.308336	0.123188	0.0122849	0.065116	0.200704	0.14848	0.198564	0.0206668	0.447727	3.10331	0.347044		n=25 (20)	stdev	0.595821	436.556	8.14956	97.859	0.472918	11.2024	9.24117	2.15747	9.91779	23.9009	2.02107	37.9239	0.726814	0.225316		n=25 (20)	stdev	0.617835	58.343	2.06745	3.10804	0.543668	1.7643	0.510788	0.148984	0.43442	0.0788499	0.501938	0.079092	0.402307	0.0572837
Onepuhi 267	Average	77.072	0.137614	12.8525	1.32369	0.0300241	0.0911263	0.963605	3.5099	4.01949	0.241717	5.05233	19.4523	7.52939		Onepuhi 267	Average	5.39	1015.62	3.615	462.25	1.0525	5.56333	48.975	17.0813	147.95	79.3125	28.8875	183.688	10.3238	2.23875		Onepuhi 267	Average	8.23625	846.125	28.175	56.7	6.2375	24.0375	4.8775	0.78625	4.665	0.742125	4.84375	0.968	3.0425	0.483875
n=22 (8)	stdev	1.0919	0.0515848	0.44612	0.424133	0.0218416	0.043998	0.229595	0.29003	0.477799	0.0306224	0.667181	2.47329	0.367708		n=22 (8)	stdev	0.938342	333.051	3.22596	67.362	0.607024	1.06068	20.442	2.51367	40.231	27.3777	10.3643	75.48	2.54337	0.496802		n=22 (8)	stdev	2.26821	179.298	4.97874	10.974	1.46237	7.99213	2.46781	0.277228	1.7845	0.3834	1.95267	0.443745	1.06358	0.23282
Kupe 481	Average	77.5208	0.153758	12.5396	1.32878	0.0284241	0.0853368	0.87155	3.53481	3.93695	0.247676	5.08127	19.7912	7.47177		Kupe 481	Average	5.53467	982.6	1.88667	368.067	1.00733	13.8679	37.7571	17.6	148.18	65.0667	31.4933	151.747	9.99933	2.26133		Kupe 481	Average	8.08933	1075	27.7667	60.3067	7.52533	25.3333	4.99133	0.743467	4.76867	0.790667	5.02133	1.082	3.164	0.523733
n=23 (15)	stdev	0.600057	0.0417938	0.283131	0.163003	0.0139272	0.0213504	0.149778	0.18639	0.289426	0.0334824	0.975773	1.44536	0.225936		n=23 (15)	stdev	1.26142	178.028	1.10042	67.0857	0.229268	14.4301	10.7178	4.14384	40.3557	14.0001	8.93552	26.9012	2.47906	0.538687		n=23 (15)	stdev	2.3185	569.461	7.60072	15.6182	4.11387	7.47526	1.48314	0.143488	1.54573	0.23885	1.57027	0.334839	1.03686	0.16204
Kaukatea 232	Average	76.3888	0.167138	13.257	1.61427	0.0353923	0.0942962	1.01748	4.01185	3.41374	0.189338	6.02303	22.4368	7.42559		Kaukatea 232	Average	6.1245	1099.2	2.1625	504.85	0.80895	8.92611	59.275	19.03	133.94	81.655	36.525	208.86	12.028	2.1125		Kaukatea 232	Average	7.366	703.6	30.555	66.05	6.7515	29.6	6.398	1.1338	6.2245	0.9713	6.2595	1.27255	3.938	0.58135
n=25 (20)	stdev	0.216346	0.0172504	0.09527	0.0746984	0.0152476	0.0127	0.0363815	0.13808	0.180525	0.0101832	0.524629	1.18359	0.15265		n=25 (20)	stdev	0.458825	112.419	3.16249	34.0746	0.283726	15.9607	7.16452	1.20092	10.6822	7.14839	2.16768	13.3029	1.05548	0.250239		n=25 (20)	stdev	0.631201	119.293	2.19269	3.67273	1.12628	2.30149	0.689528	0.117717	0.591265	0.0918804	0.473736	0.0880045	0.333665	0.067602
Potaka 305	Average	77.6083	0.14004	12.6405	1.23793	0.0270548	0.0984663	1.01753	3.57939	3.6508	0.239648	5.65496	21.3265	7.23019		Potaka 305	Average	5.466	934.15	2.3225	343.6	1.3655	17.875	36.69	18.1045	163.355	79.785	25.285	129.97	10.106	2.2475		Potaka 305	Average	9.775	1079.65	30.175	60.805	8.841	23.625	4.5565	0.706	3.992	0.64655	4.0265	0.8622	2.7305	0.3778
n=24 (20)	stdev	0.244584	0.0146795	0.106196	0.109251	0.0166775	0.0138372	0.075258	0.155764	0.214875	0.0111763	0.600187	1.22475	0.173976		n=24 (20)	stdev	0.484924	105.055	0.484256	35.0104	0.169255	15.0024	8.56485	2.0821	18.1924	9.78228	2.78289	16.7705	1.15197	0.341958		n=24 (20)	stdev	1.08562	373.432	3.21229	7.30094	4.12288	2.41048	0.728894	0.118339	0.803647	0.0861067	0.519334	0.136119	0.387576	0.0609077
Rewa 304	Average	75.6782	0.189695	13.4333	1.94741	0.0413224	0.11558	1.24468	4.0284	3.32147	0.174014	5.76764	22.9269	7.34987		Rewa 304	Average	5.80471	1089.12	2.5025	526.765	1.41412	6.13938	50.2882	19.29	116.382	105.694	34.0235	225.459	10.7176	1.68706		Rewa 304	Average	7.27882	771.706	28.8059	58.9882	6.42059	26.5253	5.72529	1.04882	5.11	0.883294	5.68353	1.16524	3.35412	0.507706
n=24 (17)	stdev	0.467633	0.0311809	0.196238	0.204289	0.0195445	0.0257528	0.128126	0.194322	0.286138	0.0128541	0.370905	1.73356	0.175407		n=24 (17)	stdev	0.632546	224.967	4.47697	73.6813	0.907841	6.89661	12.8157	2.91481	16.0244	52.7553	5.33954	39.7727	2.15972	0.37089		n=24 (17)	stdev	0.885303	139.915	4.57254	7.60492	0.734723	4.78275	1.16405	0.147686	0.882985	0.155353	0.973864	0.198761	0.43665	0.102284
Mangapipi 510	Average	74.7479	0.20253	13.7762	2.27744	0.0514528	0.104246	1.16359	4.18968	3.48696	0.215121	5.73259	21.5551	7.67665		Mangapipi 510	Average	6.66091	1395.45	2.50818	645.273	0.985455	4.943	68.8364	19.8	134.291	83.9273	38.9818	300.545	12.8391	1.97		Mangapipi 510	Average	8.61909	799	30.0091	66.3	7.85545	31.1273	6.31	1.16909	6.99091	1.03955	6.35273	1.38545	4.27727	0.651364
n=23 (11)	stdev	0.26335	0.0263843	0.168382	0.133441	0.023394	0.0210404	0.079165	0.180089	0.271119	0.0154451	1.01932	1.60446	0.246401		n=23 (11)	stdev	0.670797	493.723	3.80022	86.9725	0.744263	4.43976	12.698	1.75898	16.5045	10.1259	2.41653	21.8786	1.72101	0.266421		n=23 (11)	stdev	0.980454	67.4804	1.64101	5.28375	0.578764	3.18939	0.648305	0.163	0.93481	0.107155	0.583028	0.0957459	0.35539	0.056569
Pakihikura 303	Average	77.749	0.0956185	12.6389	1.32614	0.0293839	0.0703484	1.21266	3.53454	3.34341	0.171052	5.70732	23.317	6.87794		Pakihikura 303	Average	5.02667	608.762	0.9405	296	1.02524	10.4311	33.2524	15.8943	127.329	86.2048	20.2633	102.005	6.32095	1.29048		Pakihikura 303	Average	7.32905	827.667	23.0476	46.7762	4.56048	17.1486	3.36571	0.626476	3.13286	0.507143	3.13905	0.685524	2.00524	0.322286
n=25 (21)	stdev	0.179215	0.0198621	0.0908497	0.0723537	0.0152146	0.0137499	0.0283684	0.124992	0.178126	0.0136716	0.832916	1.23069	0.13736		n=25 (21)	stdev	0.427146	63.1165	0.239637	22.1359	0.148816	12.3471	6.91293	1.89181	12.7262	6.62129	1.21158	5.32883	0.663339	0.245122		n=25 (21)	stdev	0.798655	65.554	1.62869	3.51723	0.357106	1.56855	0.478044	0.0708693	0.387661	0.0780707	0.32252	0.0681408	0.280813	0.0503658
Birdgrove 511	Average	75.6762	0.158711	13.3756	1.72408	0.0417783	0.0949824	1.07695	3.75803	4.09363	0.186438	4.92991	18.7331	7.85166		Birdgrove 511	Average	5.20684	909.263	2.604	401.532	1.16747	2.50778	45.1632	17.1911	149.3	72.5632	32.5453	207.442	10.1332	2.26211		Birdgrove 511	Average	10.5289	763.789	29.3995	60.1684	6.65789	24.6911	5.30263	0.825263	5.44053	0.798211	5.30947	1.12511	3.01842	0.492368
n=24 (19)	stdev	1.01625	0.0723217	0.343432	0.477902	0.0144143	0.0411307	0.199067	0.385314	0.505524	0.0356322	0.919704	2.13567	0.33429		n=24 (19)	stdev	0.868818	238.026	3.44287	74.1664	0.553335	1.88794	13.3642	2.8031	38.5615	17.8705	6.82592	60.6115	2.56422	0.592645		n=24 (19)	stdev	3.21567	169.546	6.84915	12.8081	1.57145	6.22102	1.42644	0.237563	1.53224	0.196401	1.26382	0.243886	0.713437	0.114706
Mangahou 302	Average	75.236	0.215482	13.7156	1.80016	0.0335613	0.18233	1.56616	3.48428	3.7664	0.20313	6.11121	20.0605	7.25069		Mangahou 302	Average	5.22842	1233.53	8.65882	365.789	2.30016	14.9925	38.3	16.9789	148.895	113.858	22.5332	206.695	8.63368	2.51158		Mangahou 302	Average	10.1068	789.526	25.5121	49.2684	5.37684	19.5184	3.85263	0.724211	3.72474	0.573526	3.74211	0.773579	2.41	0.349368
n=23 (18)	stdev	0.468933	0.0502851	0.147445	0.166701	0.0233682	0.0363981	0.201118	0.222879	0.256704	0.0218851	0.752349	1.31371	0.246082		n=23 (18)	stdev	0.548384	265.937	4.79414	100.957	0.731808	19.2129	15.0343	1.81441	22.985	15.3352	5.06446	39.1943	1.483	1.8485		n=23 (18)	stdev	1.75921	95.4622	3.5554	6.75689	0.838372	3.4265	0.963851	0.138778	0.77727	0.15077	0.840196	0.203637	0.547388	0.0708043
Ototoka 521	Average	74.3739	0.231255	13.8274	2.40701	0.0627682	0.117067	1.26076	4.11034	3.60949	0.257311	5.99903	20.7741	7.71983		Ototoka 521	Average	6.17556	1396.06	2.98455	633.056	1.09244	2.60467	55.3611	19.1339	142.194	107.322	37.0444	299.506	11.6428	2.15333		Ototoka 521	Average	9.44	757.5	28.605	59.1722	6.99667	28.1056	5.82111	1.08922	5.93689	0.899278	6.00172	1.26267	3.62056	0.588056
n=20 (18)	stdev	0.356593	0.0290759	0.16297	0.303658	0.0274434	0.0239819	0.122631	0.249175	0.354499	0.0148951	0.693985	1.84256	0.235671		n=20 (18)	stdev	0.911013	345.489	4.06491	146.052	0.439346	0.633909	13.3848	2.33514	19.9152	24.3238	4.9639	55.5069	2.04207	0.396069		n=20 (18)	stdev	1.4974	106.375	4.21219	9.30324	1.15113	4.50326	1.11619	0.207479	1.0231	0.202273	1.11676	0.190531	0.749757	0.10963
Hikuroa Pumice member	Average	77.5691	0.0800363	12.2871	1.44714	0.0269438	0.0644808	0.85157	3.70783	3.73661	-	3.54692	20.7962	7.44444		Hikuroa Pumice member	Average	15.8625	472	1.2	324.694	-	2.09062	46.5938	14.8937	129.388	56.3188	25.4512	114.2	7.2375	-		Hikuroa Pumice member	Average	6.16562	806.094	23.325	49.6688	5.35813	20.8475	4.39625	0.69125	3.94375	0.679375	4.30938	0.905688	2.64125	0.464562
n=18 (16)	stdev	0.432009	0.0151381	0.28565	0.110413	0.018625	0.0161186	0.0426418	0.246313	0.166057	-	1.33134	0.886997	0.209368		n=18 (16)	stdev	1.70171	53.9716	1.251	25.2024	-	1.62068	4.937	1.6747	5.12912	5.62367	0.548499	12.5281	0.341262	-		n=18 (16)	stdev	0.321786	21.1709	0.81759	1.05244	0.247796	1.07921	0.329482	0.229692	0.432279	0.0993626	0.394486	0.0983204	0.228732	0.0655794
P = proximal																P = proximal																	P = proximal
D = distal																D = distal																	D = distal
K = Kaipo Bog sample																K = Kaipo Bog sample																	K = Kaipo Bog sample
XXX = Pillans et al., 2005 sample number																XXX = Pillans et al., 2005 sample number																	XXX = Pillans et al., 2005 sample number
n = number of shards analysed, (trace in parenthesis)																n = number of shards analysed, (trace in parenthesis)																	n = number of shards analysed, (trace in parenthesis)
H2OD* = water and volatiles calculated by difference																H2OD* = water and volatiles calculated by difference																	H2OD* = water and volatiles calculated by difference
[truncated: 10 more columns]

## Sheet: Table 3
Table 3. Results of Euclidean similarity coefficient (ESC) calculations
Table 3.1 - selected major elements
	Kaharoa	Taupo	Waimihia	Unit K	Whakatane-D	Whakatane-P	Mamaku	Rotoma-P	Rotoma-D	Opepe	Poronui	Karapiti	Waiohau-P	Waiohau-D	Rotorua-P	Rotorua-D	Rerewhakaaitu-P	Rerewhakaaitu-D	Okareka	Te Rere	KOT	Poihipi	Okaia	Unit L	Awakeri	Mangaone	Hauparu	Maketu	Nga Motu	Tahuna	EQF	Rotoehu	Rotoiti
Kaharoa	0
Taupo	2.4	0
Waimihia	2.31	0.21	0
Unit K	2.21	0.25	0.11	0
Whakatane-D	0.5	2.75	2.64	2.56	0
Whakatane-P	1.05	1.56	1.44	1.36	1.25	0
Mamaku	0.59	2.63	2.51	2.43	0.27	1.11	0
Rotoma-P	0.43	2.58	2.48	2.39	0.18	1.08	0.19	0
Rotoma-D	0.63	2.52	2.39	2.31	0.44	1	0.2	0.3	0
Opepe	2.61	0.48	0.55	0.61	2.94	1.77	2.81	2.78	2.7	0
Poronui	1.98	0.55	0.48	0.43	2.3	1.12	2.17	2.14	2.06	0.65	0
Karapiti	1.76	0.76	0.69	0.63	2.08	0.93	1.96	1.92	1.86	0.87	0.24	0
Waiohau-P	0.72	2.3	2.16	2.08	0.69	0.81	0.48	0.52	0.3	2.51	1.87	1.68	0
Waiohau-D	0.87	2.39	2.25	2.17	0.74	0.89	0.54	0.6	0.37	2.6	1.97	1.79	0.2	0
Rotorua-P	0.7	1.87	1.77	1.68	0.9	0.41	0.79	0.74	0.71	2.09	1.44	1.23	0.55	0.66	0
Rotorua-D	0.41	2.2	2.14	2.04	0.85	1.03	0.94	0.78	0.96	2.46	1.84	1.63	0.95	1.09	0.71	0
Rerewhakaaitu-P	0.42	2.51	2.41	2.32	0.37	1.04	0.47	0.32	0.55	2.73	2.09	1.86	0.65	0.71	0.67	0.61	0
Rerewhakaaitu-D	0.27	2.2	2.12	2.02	0.67	0.89	0.72	0.57	0.74	2.42	1.79	1.57	0.74	0.89	0.53	0.25	0.44	0
Okareka	0.98	2.75	2.61	2.53	0.64	1.23	0.41	0.59	0.38	2.89	2.27	2.07	0.57	0.53	1	1.32	0.84	1.09	0
Te Rere	0.42	2.57	2.48	2.39	0.34	1.11	0.49	0.33	0.6	2.79	2.15	1.93	0.73	0.79	0.77	0.64	0.16	0.49	0.87	0
KOT	0.97	1.99	1.86	1.79	0.99	0.52	0.8	0.84	0.72	2.11	1.49	1.29	0.63	0.68	0.49	1.12	0.89	0.89	0.83	0.96	0
Poihipi	0.43	2.43	2.33	2.24	0.33	0.93	0.26	0.18	0.31	2.63	1.98	1.76	0.46	0.55	0.58	0.73	0.29	0.5	0.61	0.35	0.69	0
Okaia	1.07	1.96	1.83	1.76	1.08	0.53	0.88	0.94	0.79	2.08	1.46	1.27	0.69	0.73	0.57	1.22	0.99	0.99	0.87	1.06	0.11	0.78	0
Unit L	0.91	1.98	1.85	1.77	0.95	0.48	0.74	0.79	0.62	2.14	1.51	1.32	0.47	0.53	0.42	1.07	0.86	0.84	0.77	0.94	0.21	0.64	0.25	0
Awakeri	1.23	1.56	1.4	1.33	1.44	0.53	1.24	1.26	1.08	1.73	1.13	1	0.86	0.96	0.72	1.29	1.32	1.14	1.26	1.4	0.72	1.13	0.69	0.6	0
Mangaone	1.82	0.96	0.81	0.75	2.14	1.07	1.97	1.96	1.83	1.09	0.66	0.69	1.61	1.73	1.34	1.76	1.98	1.69	2.03	2.06	1.4	1.83	1.37	1.34	0.78	0
Hauparu	3.33	1.06	1.2	1.27	3.69	2.54	3.56	3.53	3.46	0.81	1.42	1.63	3.26	3.36	2.84	3.14	3.47	3.13	3.66	3.54	2.89	3.38	2.86	2.91	2.47	1.75	0
Maketu	5.47	3.17	3.32	3.39	5.87	4.72	5.76	5.71	5.65	3.01	3.62	3.83	5.44	5.54	5.02	5.24	5.63	5.27	5.87	5.69	5.11	5.56	5.07	5.12	4.65	3.91	2.22	0
Nga Motu	2.95	0.87	0.94	1	3.29	2.17	3.15	3.13	3.04	0.57	1.08	1.3	2.84	2.95	2.46	2.8	3.11	2.78	3.22	3.18	2.49	2.99	2.45	2.5	2.02	1.29	0.54	2.69	0
Tahuna	0.49	2.57	2.47	2.38	0.23	1.07	0.27	0.19	0.41	2.75	2.11	1.89	0.61	0.67	0.73	0.79	0.28	0.57	0.63	0.3	0.79	0.18	0.89	0.78	1.3	1.99	3.51	5.69	3.12	0
EQF	0.72	2.72	2.67	2.57	0.81	1.46	1.01	0.87	1.16	2.9	2.3	2.06	1.3	1.39	1.15	0.74	0.71	0.72	1.38	0.65	1.34	0.87	1.44	1.38	1.79	2.32	3.6	5.7	3.28	0.77	0
Rotoehu	0.72	2.59	2.46	2.38	0.45	1.06	0.19	0.34	0.13	2.77	2.13	1.93	0.38	0.39	0.78	1.06	0.59	0.83	0.27	0.63	0.73	0.36	0.8	0.65	1.15	1.91	3.53	5.73	3.11	0.41	1.18	0
Rotoiti	0.76	2.56	2.43	2.35	0.51	1.04	0.25	0.39	0.13	2.74	2.1	1.9	0.34	0.35	0.77	1.08	0.63	0.85	0.26	0.68	0.71	0.4	0.77	0.62	1.11	1.87	3.5	5.7	3.08	0.47	1.23	0.07	0
Table 3.2 - selected trace elements
	Kaharoa	Taupo	Waimihia	Unit K	Whakatane-P	Mamaku	Rotoma	Opepe	Poronui	Karapiti	Waiohau-P	Waiohau-D	Rotorua-P	Rotorua-D	Rerewhakaaitu-P	Rerewhakaaitu-D	Okareka	Te Rere	KOT	Poihipi	Okaia	Unit L	Awakeri	Mangaone	Hauparu	Maketu	Nga Motu	Tahuna	EQF	Rotoehu	Rotoiti
Kaharoa	0
Taupo	25.6838	0
Waimihia	33.6525	9.19069	0
Unit K	25.2463	6.36411	8.87575	0
Whakatane-P	14.4397	13.5782	19.9798	11.2003	0
Mamaku	9.60472	16.4946	24.1175	15.7085	5.38266	0
Rotoma	21.1664	6.31089	12.5315	4.45748	7.79034	11.6082	0
Opepe	14.738	13.7529	20.1816	11.6241	3.46175	6.28724	8.27459	0
Poronui	11.6743	18.1868	24.3959	15.596	5.1198	5.5936	12.388	4.8577	0
Karapiti	27.7778	6.18388	6.5498	3.71333	14.1303	18.2632	6.82836	13.9854	18.2337	0
Waiohau-P	25.6396	1.22655	9.82375	7.36466	13.9806	16.5711	6.86494	14.0988	18.54	6.98724	0
Waiohau-D	23.9728	2.06453	11.0172	7.02088	12.4112	14.8911	5.57978	12.481	16.9053	7.18587	1.72678	0
Rotorua-P	20.331	5.96067	14.3675	8.28704	9.55599	11.3927	4.76165	9.1738	13.5547	9.18309	5.745	4.06339	0
Rotorua-D	12.8427	38.4445	46.3138	37.7833	26.725	22.2049	33.7893	26.9341	23.1277	40.3235	38.3684	36.6999	33.0149	0
Rerewhakaaitu-P	1.36388	26.1941	34.1939	25.8133	15.0333	10.1733	21.7058	15.1164	12.1107	28.2575	26.1238	24.4475	20.7441	12.3208	0
Rerewhakaaitu-D	3.43019	28.2501	36.2958	27.9751	17.252	12.284	23.8191	17.5642	14.4468	30.398	28.1338	26.4737	22.8278	10.3135	2.89577	0
Okareka	22.7101	3.724	12.2257	7.39777	11.4549	13.6752	5.052	11.3067	15.7145	7.63931	3.38533	1.83494	2.55907	35.399	23.1533	25.1719	0
Te Rere	10.0424	30.4207	36.7432	27.883	17.0065	14.6416	24.6916	17.3271	12.6014	30.6944	30.6881	29.0282	25.5312	13.7332	10.1614	10.844	27.8138	0
KOT	12.5215	13.685	22.0751	14.5334	7.4242	4.93396	10.147	7.02322	9.07498	16.3542	13.501	11.8188	8.0383	25.0763	12.8489	14.8834	10.4248	18.9591	0
Poihipi	3.22515	24.1962	31.7307	23.1572	12.162	7.72533	19.2063	12.5795	9.06256	25.7309	24.2317	22.5429	18.9007	14.6402	3.68951	5.49006	21.2535	8.69165	11.3905	0
Okaia	8.58098	17.6945	25.7574	17.699	8.25451	3.62445	13.4371	7.75609	7.41636	19.7819	17.602	15.8985	12.0582	21.0554	8.83126	11.0304	14.4967	15.1132	4.25362	7.4105	0
Unit L	20.0623	6.4763	13.7852	6.37795	7.72688	10.6441	2.23139	7.79421	12.0406	8.02387	6.7175	5.12695	2.93314	32.7239	20.5489	22.6331	3.97844	24.2853	8.43537	18.26	12.0081	0
Awakeri	34.2566	11.1343	3.14629	9.07543	20.1799	24.7335	13.2422	20.2806	24.3147	7.06562	11.9222	12.8532	15.7251	46.8056	34.8019	36.9939	13.8809	36.5332	23.1187	32.1786	26.5198	14.7587	0
Mangaone	48.334	22.9267	14.9321	23.7592	34.8786	38.8852	27.3529	34.853	39.187	21.0803	23.194	24.7412	28.3741	61.0623	48.8498	50.9458	26.0275	51.5859	36.3662	46.5389	40.2461	28.3627	15.2787	0
Hauparu	56.8613	32.164	25.5671	33.731	44.2623	47.8303	36.8008	43.4229	48.029	30.5123	32.1778	33.6308	36.7584	69.422	57.2004	59.3987	34.6179	60.5338	44.5929	55.2744	48.4299	37.3441	25.8368	13.2825	0
Maketu	58.9273	34.6028	27.0557	35.0265	45.6989	49.7645	38.5561	44.8508	49.259	32.0074	34.8224	36.1868	39.2065	71.4458	59.292	61.6126	37.1725	61.5783	47.0087	57.1265	50.6293	39.392	26.5435	14.7248	6.82041	0
Nga Motu	65.993	41.6208	35.4722	43.5293	53.8435	57.1827	46.4162	52.8242	57.4794	40.2331	41.5437	42.9866	46.0092	78.4207	66.2711	68.4466	43.9127	69.9518	53.6812	64.5272	57.5165	46.8016	35.8172	22.8211	10.0295	12.4903	0
Tahuna	2.4682	26.124	34.2046	25.9389	15.3733	10.3113	21.744	15.4327	12.6319	28.2474	25.9978	24.3235	20.5971	12.4959	1.73689	2.50719	22.9746	11.18	12.6154	4.23556	8.68597	20.4756	34.913	48.7976	57.0562	59.2864	66.0647	0
EQF	14.4089	11.5674	19.8739	12.3785	6.56073	5.77959	7.95833	6.58053	9.46726	14.2406	11.421	9.73075	6.05977	27.0347	14.8112	16.8114	8.38569	20.2536	2.35168	13.0296	6.28071	6.27117	20.958	34.2459	42.7739	45.1403	51.9762	14.6255	0
Rotoehu	35.6355	10.3422	6.24872	13.0111	23.1353	26.4212	15.4061	22.8431	27.4278	9.99083	10.3432	11.8526	15.3417	48.3285	36.071	38.1233	12.9821	39.9324	23.3353	34.0483	27.3445	15.8618	8.65332	13.4948	22.0262	24.8861	31.5313	35.9045	21.322	0
Rotoiti	31.67	6.34283	6.61268	10.3451	19.5718	22.5518	11.9368	19.3786	23.9736	7.8802	6.20483	7.7699	11.4054	44.3776	32.1136	34.1449	8.99764	36.3833	19.3619	30.1949	23.4441	12.1776	9.3275	17.4328	26.0628	28.9484	35.4399	31.9493	17.3511	4.2359	0

## Sheet: Table 4
Table 4. Geochemically similar tephra and their distinctions
Tephra	Agesª	Magma volume (km3)*	Geochemical distinction	Other distinctions
Taupo (Unit Y, TVC)	1,718 ± 10	13.4	Indistinguishable	age, volume, stratigraphic relationship
Waimihia (Unit S, TVC)	3,382 ± 50	5.1
Waimihia (Unit S, TVC)	3,382 ± 50	5.1	Lu, Sc, Mn, Co, Ba	age, volume, stratigraphic relationship
Unit K (TVC)	5,088 ± 73	0.12		to Stent Tephra
Waimihia (Unit S, TVC)	3,401 ± 108	5.1	FeO vs. CaO, Na2O+K2O, Lu, Sc, Mn, Co,	age, volume, stratigraphic relationships
Poronui (Unit C, TVC)	11,159 ± 51	0.23
Waimihia (Unit S, TVC)	3,382 ± 50	5.1	FeO vs. CaO, Na2O+K2O, Lu, Sc, Mn, Co,	age, stratigraphic relationships
Karapiti (Unit B, TVC)	11,501 ± 104	0.42
Unit K (TVC)	5,088 ± 73	0.12	FeO vs. CaO, Na2O+K2O, Lu, Sc, Mn, Co,	age, stratigraphic relationships
Poronui (Unit C, TVC)	11,170 ± 115	0.23
Unit K (TVC)	5,088 ± 73	0.12	FeO vs. CaO, Na2O+K2O, Lu, Sc, Mn, Co,	age, stratigraphic relationships
Karapiti (Unit B, TVC)	11,501 ± 104	0.42
Mamaku	7,992 ± 58	13	Ba/Th vs. Rb/Sr, Rb/Zr vs. Rb/Sr	volume, chemistry
Rotoma	9,472 ± 40	8
Poronui (Unit C, TVC)	11,195 ±- 51	0.23	Indistinguishable
Karapiti (Unit B, TVC)	11,501 ± 104	0.42
Waiohau	14,018 ± 91	3.3	Ba, Hf, Ba/Zr vs. Ba/Th, Rb/Sr, Rb/Zr; Rotorua is bi-modal	volume, chemistry, mineralogy
Rotorua	15,738 ± 263	1
Waiohau	14,018 ± 91	3.3	Cs, La, Ce, Nd, Eu, Rb/Zr, Ba/Th; Rerewhakaaitu is bimodal	volume, chemistry, mineralogy
Rerewhakaaitu	17,209 ± 249	5
Rotorua	15,738 ± 263	1	Indistinguishable	age
Rerewhakaaitu	17,209 ± 249	5
Poihipi	28,446 ± 670	0.5	La/Yb vs. Ba/Y, Rb/Zr vs. Ba/Th	age
Tahuna	38,400 +1700/-1400	2.0b
Rotoma	9,472 ± 40	8	Ba, Cs, Y, Sm, Nd, Pr, Er, Ho, Dy, Tb, Eu, Tm, Yb, Pb, U, Th	age, volume, stratigraphic relationships
Rotoehu	45,170 ± 3300	90c
KOT	25,358 ± 162	530	Indistinguishable	volume, shard morphology
Okaia	28,545 ± 345	3
KOT	25,358 ± 162	530	Unit L bimodal in Rb/Zr, Ba/Th, Ce/Th, Y/Th	volume, mineral geochemisty (Smith et al., 2002)
Unit L (Mangaone sgp OVC)	30,600 +600/-1500	c. 7.0d
ª Ages from Table 1
* Volumes from Lowe et al., 2008 and references therein,
except for Tahuna, Rotoiti/Rotoehu, and Unit L (Mangaone Subgroup)
b Tahuna tephra-fall volume estimate in km3 from Froggatt and Lowe 1990
cRotoehu tephra-fall volume in km3 from Froggatt and Lowe 1990
dUnit L tephra-fall volume in km3 from Jurado-Chichay and Walker 2000

## Sheet: Table 5
Table 5. Dominant ferroganesian mineral assemblages for late Quaternary silicic tephra deposits updated from Froggatt and Lowe 1990
Assemblage 1ª	Assemblage 2	Assemblage 3	Assemblage 4	Assemblage 5	Assemblage 6
Plag ± opx ± mnt ± ilm	Hyp + hbl ± aug	Hyp + hbl + bio	Hyp + cgt ± hbl	Hyp + aug ± hbl	Aegirine*
Taupō VC	Okataina VC	Okataina VC	Okataina VC	Okataina VC	Tuhua VC (Mayor Is)
Taupō - Unit Y	Mamaku	Kaharoa	Whakatane	Hauparu	Tuhua
(Mapara - Unit X)	Waiohau	Rotorua (upper)	Rotoma	Te Mahoe
(Whakaipo - Unit V)	Rotorua (lower)	Rerewhakaaitu	Rotoiti/Rotoehu (all)	Maketu
Waimihia - Unit S	Unit L	Okareka
Unit K	Te Rere	Rotoiti/Rotoehu (upper)
(Motutereº - Units G & H)	(Omatoroa)
Opepe - Unit E	Awakeri	Kapenga VC
Poronui - Unit C	Mangaone	Earthquake Flat
Karapiti - Unit B	Tahuna
	Ngamotu	Maroa VC
		Puketarata
	Taupō VC
	Kawakawa (all)
	Poihipi
	Okaia
	(Tihoi)
	(Waihoroa)
	(Otake)
Plag - plagioclase feldspar; opx - orthopyroxene; mnt - magnetite; ilm - Ilmenite; hyp - Hypersthene; hbl - hornblende; bio - biotite; cgt - cummingtonite; aug - augite
The assemblages are listed with mineral species in order of abundance, the diagnostic mineral in each assemblage is in bold, tephra are listed multiple times
if their mineral assemblage changes through the eruption sequence, and deposits in brackets are not included in the TephraNZ database
ª Assemblage 1 updated using Barker et al., 2015
*Assembly 6 aegirine ± riebeckite ± aenigmatite ± olivine ± tuhualite
ºMotutere was listed in Froggatt and Lowe 1990 as a single unit with Assemblage 1 mineralogy, but this has subsequently been redefined by Wilson 1993 into two
subunits G & H, which do not have their independent assemblages defined.
