# Supplementary material for: TephraNZ: a major- and trace-element reference dataset for glass-shard analyses from prominent Quaternary rhyolitic tephras in New Zealand and implications for correlation
Source: Copernicus journal article supplement (doi:10.5194/gchron-3-465-2021), 2021-09-23
Supplement: Supplementary file 1 [file TephraNZ_SM_Tables_FINAL4.xlsx]

## Sheet: SM Table 1 - Analytical set up
SM Table 1.1 EMPA machine set up (after Abbott et al., 2021)
(a)				(b)
Category	Explanation/Definition/Example	Reference & Resources		Channel 1				Channel 2				Channel 3				Channel 4				Channel 5
Instrument Metadata and Conditions				Element	Mineral	Crytal	Time	Element	Mineral	Crytal	Time	Element	Mineral	Crystal	Time	Element	Mineral	Crystal	Time	Element	Mineral	Crystal	Time
EPMA or SEM instrument details	JEOL JXA8230 Superprobe with 5 spectrometers			Ca	VG-A99	PETL	30/15	Na*	VG-568	TAP	10/5	Si	VG-568	TAP	30/15	K	VG-568	PETL	30/15	Cl	VG-568	PETL	30/15
EPMA or SEM instrument location	Victoria University of Wellington			Ti	TiO2	PETL	30/15	Mg	VG-A99	TAP	30/15	Al	VG-568	TAP	30/15	Fe	VG-A99	LIF	30/15	Mn	MnO	LIFL	30/15
Analytical and automation software and version	JEOL, Cameca Peaksight, Probe for EPMA
Beam voltage (kV)	15kV			Time listed as peak/background
Beam current (nA)	8nA			* Na is run twice, on the second run the peak search is skipped to reduced the volatilisation of the element
Beam diameter (µ)	10 µm (circle)
Describe efforts made to minimize and/or correct for alkali element migration (Na-loss) or other forms of damage in beam-sensitive materials.	Na2O was run twice, the second time skipping the peak search, and lowering the collection time to 10s to reduce the volatilisation of the element, with the second standardisation value then used	Kuehn, S. C., Froese, D. G., & Shane, P. A. R. (2011). The INTAV intercomparison of electron-beam microanalysis of glass by tephrochronology laboratories: results and recommendations. Quaternary International, v. 246, n.1, p. 19-47.
EDS utilized?	N
WDS utilized?	Y
Spectrometer assignments, acquisition times, and per-spectrometer sequencing	See additional table (b) adjacet for full details
Primary standard or calibration reference	Calibration standards shown in table adjacent (b), primary standard - VG568	See SM table 3 for full standard data
Secondary reference materials	ATHOG and VG-A99	See SM table 3 for full standard data
Matrix corrections	ZAF correction method	Armstrong, J.T. (1995). Citzaf-a package of correction programs for the quantitative Electron Microbeam X-Ray-Analysis of thick polished materials, thin-films, and particles. Microbeam Analysis, 4(3), pp.177-200.
Additional corrections implemented in post-processing (offline corrections)	Primary standard correction and correction for secondary hydration	Full details in text Sect. 2.3
Observation/Data
EPMA data reporting	All standard data reported in SM Table 3; All EPMA sample data reported in SM Table 2
*sample ID	TephraNZ
*phases targeted in geochemical analysis	glass shards
*date EPMA or SEM analysis performed	2019/12
SM Table 1.2 LA-ICP-MS machine set up (After Abbott at el., 2021)
Category	Explanation/Definition/Example	Reference & Resources
Instrument Metadata and Conditions
LA-ICP-MS instrument details	Agilent 7900 Quad coupled with a Resonetics S155-SE laser system using GeoStar software
LA-ICP-MS instrument location	Victoria University of Wellington
RF power	1200-1320 W
Gas flows	Ar 0.5 L/min, He 0.4 L/min, N2 0.0024 L/min
Garrier gas composition	He
Instrument sampling strategy	spot
Laser spot size	25 µm
Shape of ablated area	spot
Laser wavelength	193 nm
Laser pulse time	20 ns
Repetition rate (hz)	5 Hz
Transect rate (µm/s)	N/A
Fluence (J/cm^2)	2.65 J/cm^2
Signal smoothing used	N/A
Analysis count time	30 s
Background count time	40 s (background 20s, cleaning spot, background 20s, analysis 30s)
Elements analysed (10 ms)	10 ms: 29Si, 43Ca, 47Ti, 53Cr, 55Mn
Elements analysed (20 ms)	20 ms: 7Li, 45Sc, 51V, 59Co, 60Ni, 63Cu, 66Zn, 71Ga,
	85Rb, 86Sr, 89Y, 90Zr, 91Zr, 93Nb, 95Mo, 98Mo 133Cs, 138Ba, 139La
	140Ce, 141Pr, 146Nd, 147Sm, 151Eu, 153Eu, 157Gd, 159Tb, 163Dy, 165Ho, 166Er,
	169Tm, 172Yb, 175Lu, 178Hf, 181Ta, 182W, 208Pb, 232Th, 238U,
Primary standard or calibration reference	NIST610 and NIST612 used to tune the instrument; ATHOG used to calibrate and standardize the results (MPI-DING; Jochum et al., 2006)	Jochum, K.P., Stoll, B., Herwig, K., Willbold, M., Hofmann, A.W., Amini, M., Aarburg, S., Abouchami, W., Hellebrand, E., Mocek, B. and Raczek, I., 2006. MPI‐DING reference glasses for in situ microanalysis: New reference values for element concentrations and isotope ratios. Geochemistry, Geophysics, Geosystems, 7(2).
Reference for calibration standard data	source of certified or other target concentrations for standard reference materials
ThO/Th ratio	tuned to 1.3 - 1.8 %
Secondary reference materials	STSH6/80-G (MPI-DING; Jochum et al., 2006)	Jochum, K.P., Stoll, B., Herwig, K., Willbold, M., Hofmann, A.W., Amini, M., Aarburg, S., Abouchami, W., Hellebrand, E., Mocek, B. and Raczek, I., 2006. MPI‐DING reference glasses for in situ microanalysis: New reference values for element concentrations and isotope ratios. Geochemistry, Geophysics, Geosystems, 7(2).
Drift monitor frequency	the full standard suite was re-run every 10 unknowns to monitor drift
Internal standard and how IS value derived	43Ca analysed by EPMA
Data reduction software and version	Iolite 3 using "trace_element_IS" DRS and "Average_Spline" spline type (Patton et al., 2011)	Patton, C., Hellstrom, J., Paul, B., Woodhead, J.H. and Hergt, J., 2011. Iolite: freeware for the visualization and processing of mass spectrometry data. Journal of Analytical Atomic Spectrometry, 26, pp.2508-18.
Secondary correction used	see details in text Sect. 2.4.
LA-ICP-MS method references	see details in text Sect. 2.4.
Observation/Data
LA-ICP-MS data reporting	all data reported in SM table 2, all standard data reported in SM Table 4
Sample ID	TephraNZ
Phases targeted in geochemical analysis	glass shards - replication of spots analysed by EPMA mapped during EPMA analysis
Date LA-ICP-MS analysis performed	2020/01, 2020/02, and 2020/06 exact dates listed in SM Table 4

## Sheet: SM Table 2 - All data 
SM Table 2. All tephra analysis major and trace elements
Note where appropriate EPMA and LA-ICP-MS analyses were run on the same spot, data are reported for each spot, where trace element data are not reported they were not obtained for this specific spot
Outliers have been removed, but retained, and are listed at the bottom of the table with a note explaining their removal where appropriate
Tephra name	SiO2 (wt%)	TiO2 (wt%)	Al2O3 (wt%)	FeOt (wt%)	MnO (wt%)	MgO (wt%)	CaO (wt%)	Na2O (wt%)	K2O (wt%)	Cl (wt%)	H2OD*	SiO2/K2O	Na2O + K2O		Sc (ppm)	Ti (ppm)	V (ppm)	Mn (ppm)	Co (ppm)	Cu (ppm)	Zn (ppm)	Ga (ppm)	Rb (ppm)	Sr (ppm)	Y (ppm)	Zr (ppm)	Nb (ppm)	Mo (ppm)	Cs (ppm)	Ba (ppm)	La (ppm)	Ce (ppm)	Pr (ppm)	Nd (ppm)	Sm (ppm)	Eu (ppm)	Gd (ppm)	Tb (ppm)	Dy (ppm)	Ho (ppm)	Er (ppm)	Tm (ppm)	Yb (ppm)	Lu (ppm)	Hf (ppm)	Ta (ppm)	W (ppm)	Pb (ppm)	Th (ppm)
Kaharoa-P_1	77.9721	0.114725	12.4356	0.974801	0.114725	0.097845	0.916188	3.94967	3.42434	0.180416	4.11829	22.77	7.37401		10.22	711	1.11	381	0.396	Below LOD	41.9	13.8	106.3	73.6	22.5	98.3	7.12	1.24	3.83	766	22.21	48.2	5.14	18.8	3.19	0.74	3.53	0.555	2.99	0.74	2.55	0.33	2.38	0.68	3.18	0.56	1.02	15	10.13
Kaharoa-P_2	77.4491	0.0786979	13.2557	0.893446	0.0490981	0.0730769	0.741839	3.68624	3.77268	0.179307	5.40483	20.5289	7.45893		13	742	2.92	475	0.72	Below LOD	42.5	19.6	176	33.2	35.4	88	9.73	2.47	6.98	1128	24.8	53.9	6.44	19.8	4.8	0.51	4.8	0.8	5.4	1.24	3.57	0.46	3.8	1.24	2.61	0.83	1.74	20.6	14.8
Kaharoa-P_3	77.8634	0.0696673	12.6456	0.839448	0.0690962	0.065979	0.526019	3.75293	4.16779	0.174345	2.7122	18.6822	7.92072		11.5	451	Below LOD	451.95	0.13	Below LOD	45	14.9	162	35.1	29.7	66	8.48	2.5	6.78	1069	19.6	43.7	5.7	22.8	5.6	0.42	4.66	0.77	6.5793	1.3641	3.04	0.258	4.1	0.55	2.41	0.888	1.68	20.2	13
Kaharoa-P_5	77.9579	0.0608797	12.6561	0.798027	0.0593865	0.0306275	0.499485	3.71613	4.22145	0.170705	3.27013	18.4671	7.93758		18.3	588	0.78	688	0.405	1.4	78.5	24.13	220	48.111	43.669	105.2	14.4	3.4	9.3	1580	32.1	74	7.4785	29.9	7.5	0.86	5.4	0.8782	7.3	1.475	4.2	0.85	8	1.71	5.4	1.256	2.76	31.1	19.7
Kaharoa-P_6	77.9781	0.216707	12.8056	0.814653	0.0879577	0.104714	1.05258	3.94692	2.99276	0.138244	4.12063	26.0556	6.93968		9.49	826	1.42	381	0.194	1.43	38	12.41	76.1	77.9	22.6	115.1	7.22	1.33	1.74	705	20.5	46.2	5.35	20.9	3.46	0.87	4.01	0.53	3.59	0.9	2.52	0.337	2.7	0.84	3.93	0.68	1.11	11.5	7.73
Kaharoa-P_7	78.0023	0.077235	12.732	0.824783	0.0418636	0.0348198	0.518633	3.8059	3.96242	0.170874	0.735854	19.6855	7.76832
Kaharoa-P_8	77.7296	0.0550681	12.5577	0.882098	0.0870764	0.0407861	0.505194	3.94973	4.19276	0.158896	3.15016	18.539	8.14249		9.6	420	Below LOD	460	0.13	0.7	39	15	120	29	24	55	8.7	1.5	4.8	900	19	37	4.6	17	4.8	0.18	4.8	0.81	2.6	0.64	1.7	0.72	3.9	0.68	3	0.81	1.1	19	11
Kaharoa-P_9	78.2364	0.114113	12.6707	0.936764	0.0673867	0.0845176	0.774094	3.10626	4.00973	0.182153	7.49908	19.5116	7.11599		8.48	592	1.18	379	0.395	1.35	29	15.9	136.2	59.6	21.05	76	7.59	1.39	5.79	969	27.8	51	5.01	19.8	3.6	0.38	3.07	0.572	3.5	0.643	2	0.341	2.64	0.83	2.94	0.7	1.75	20.4	14.5
Kaharoa-P_10	77.8204	0.203773	12.6989	1.14364	0.116558	0.127639	1.05548	3.84829	2.98537	0.138907	4.578	26.0672	6.83366		9.36	800	3.5	495	0.32	0.57	44.1	13.1	71.2	77	21.7	106	6.6	1.08	2.5	656	20	41.8	4.44	17.7	3.6	0.92	3.5	0.53	3.54	0.73	1.72	0.29	2.47	0.84	2.84	0.431	0.69	11.5	6.43
Kaharoa-P_11	77.7684	0.0651045	12.6538	0.831155	0.0854353	0.0431438	0.519763	3.74013	4.29304	0.180133	2.72044	18.115	8.03316		8.4	300	Below LOD	430	0.09	1.4	41	12	120	27	25	63	6.5	1.2	5.6	850	18	48	4.6	18	2.4	0.68	2.5	0.37	4.6	0.56	2.4	0.54	3.1	1.4	2.2	0.75	1.4	18	10
Kaharoa-P_12	78.0233	0.0828283	12.5367	0.861348	0.055679	0.0340815	0.53619	3.65843	4.2114	0.165146	3.41465	18.5267	7.86984
Kaharoa-P_13	77.7201	0.0772066	12.6069	0.935334	0.0849272	0.04541	0.510409	3.8269	4.19282	0.184801	2.13843	18.5365	8.01972		8.6	364.4	Below LOD	454.35	0.192	1.49	35.5	11.4	128.6	27.87	23.66	60	8.09	1.63	5.9	907.84	18.46	42.8	4.2	16.36	3.75	0.7	2.1	0.49	4.35	0.92	2.3	0.27	3.1	0.79	3.11	0.71	1.4	19.8	12.05
Kaharoa-P_14	77.9117	0.0647059	12.6887	0.804858	0.0622794	0.0564822	0.516246	3.73999	4.15498	0.191572	3.83843	18.7514	7.89496		9.9	370	Below LOD	490	0.24	0.59	36	14	140	30	24	63	6.7	1.5	5.4	940	20	50	6.2	23	5.7	0.5	2.8	0.48	4.2	0.71	3.7	0.53	3.6	0.7	2.9	0.7	1.6	19	13
Kaharoa-P_15	77.611	0.0815042	12.8537	0.738781	0.0473177	0.0486281	0.54635	3.93161	4.14106	0.185394	1.84549	18.7418	8.07266
Kaharoa-P_16	78.2871	0.134099	12.4894	0.956344	0.0602862	0.103638	0.948713	3.67003	3.35037	0.12378	4.71373	23.3667	7.0204		8.84	711	1.12	426	0.314	0.54	39	12.6	99.3	75.7	21.6	92.8	6.51	1.24	4.18	761	22.1	49	5.06	17.6	3.71	0.84	3.68	0.545	4.16	0.76	2.13	0.422	2.31	0.7	2.97	0.6	1.05	14.54	9.49
Kaharoa-P_17	77.9376	0.0457622	12.5301	0.781903	0.0709901	0.050406	0.538279	3.8818	4.16311	0.193358	5.30763	18.721	8.04491		9.75	428	Below LOD	464	0.135	1.68	41	14.2	161	34.4	28.3	69.1	8.6	1.31	6.55	1010	20.9	47.4	5.5	20.2	4.1	0.47	3.7	0.71	4.6	1.1	3.24	0.44	3.5	0.78	2.4	0.95	2.14	18.1	11.3
Kaharoa-P_18	78.0982	0.0733877	12.6313	0.887125	0.0461294	0.0509034	0.55044	3.46743	4.19507	0.18018	4.61618	18.6167	7.6625
Kaharoa-P_19	77.8218	0.0674486	12.6461	0.804721	0.0793102	0.0551235	0.550575	3.73736	4.23757	0.183401	4.45394	18.3647	7.97493		9.7	450	Below LOD	510	Below LOD	5.6	44	14	150	32	30	68	9.3	1	6.9	1000	21	45	4.9	19	2.1	0.53	4.5	0.87	4.2	0.51	3.8	0.68	4	0.47	3.8	0.68	2.3	17	10
Kaharoa-P_20	77.7487	0.0691818	12.6798	0.836712	0.0636246	0.0554394	0.522353	3.84406	4.18009	0.188035	2.02953	18.5998	8.02415		9.25	398	Below LOD	464	0.199	0.64	27.9	13.5	144	29.7	26.4	64.7	7.4	1.26	6.27	889	18.7	42.7	4.31	16.1	3.78	0.47	3.7	0.7	3.9	1.191	3.28	0.4	3.79	0.86	2.79	0.74	1.6	15.4	11.3
Kaharoa-P_21	77.8909	0.0636561	12.716	0.744752	0.0878454	0.0300025	0.541576	3.7994	4.12587	0.17668	3.99801	18.8787	7.92527		10.69	509	Below LOD	506	Below LOD	1.64	36.9	14.8	165	34.3	27.9	61.7	8.51	1.24	5.94	1060	22.24	47.5	4.99	19.6	4.5	0.46	4.6	0.616	4.2	1.06	2.64	0.513	3.53	0.96	2.59	0.843	2.04	19	11.68
Kaharoa-P_22	77.8862	0.0793647	12.5819	0.836998	0.0797097	0.0460028	0.499096	3.83721	4.15348	0.174422	3.39951	18.752	7.99069
Kaharoa-P_23	77.8808	0.0464216	12.6566	0.767951	0.0797093	0.0452837	0.530849	3.78096	4.21136	0.179709	1.86567	18.493	7.99231
Kaharoa-P_24	77.8317	0.0504887	12.7904	0.822178	0.0594122	0.0539174	0.528915	3.7128	4.15017	0.188736	5.36928	18.7539	7.86297
Kaharoa-P_25	77.9842	0.144188	12.5076	0.765695	0.0302109	0.0805184	0.496553	3.70308	4.28796	0.0624721	2.90474	18.1868	7.99105
Average	77.8921	0.0890089	12.6678	0.85348	0.0702506	0.0607911	0.621909	3.75389	3.99073	0.168819	3.6752	19.738	7.74462		10.3175	541.275	1.71857	465.956	0.275714	1.46385	41.2062	14.7088	135.981	45.2801	26.7174	78.2438	8.21563	1.58062	5.52875	949.428	21.7131	48.0125	5.24491	19.785	4.16188	0.595625	3.83438	0.639137	4.35683	0.908944	2.79937	0.461313	3.5575	0.876875	3.06687	0.758	1.58625	18.1337	11.6319
Standard Deviation	0.181456	0.0451138	0.160948	0.0894997	0.0212279	0.0262678	0.184303	0.177577	0.391074	0.0286188	1.48042	2.34796	0.395943		2.43286	170.311	1.04926	72.8515	0.167293	1.3193	11.0993	3.14524	37.9972	20.0899	5.95375	19.4991	1.93698	0.648984	1.83535	215.319	3.73208	8.0447	0.869578	3.36799	1.32799	0.211312	0.922496	0.154095	1.21308	0.296936	0.769688	0.171196	1.33124	0.320535	0.774181	0.184312	0.54181	4.53259	3.0806
Taupo-P Y5-3_1	73.6139	0.227344	14.1209	2.07891	0.182655	0.340891	1.50808	4.65988	3.26737	0.0653453	0.297887	22.5301	7.92725
Taupo-P Y5-3_4	75.6818	0.258323	13.2667	2.06501	0.108611	0.221089	1.53993	4.00166	2.85679	0.189191	3.22197	26.492	6.85845
Taupo-P Y5-3_5	75.5977	0.27044	13.0514	2.06771	0.158742	0.198618	1.52097	4.19181	2.94259	0.179206	2.2171	25.6909	7.1344
Taupo-P Y5-3_6	75.7174	0.280159	13.237	2.03083	0.0882275	0.225907	1.47575	4.14881	2.79587	0.195291	1.64319	27.0819	6.94467
Taupo-P Y5-3_7	76.2109	0.298734	13.2179	1.83728	0.147689	0.166564	1.2703	4.00991	2.84071	0.137996	0.692186	26.8282	6.85062
Taupo-P Y5-3_8	75.694	0.28219	13.1917	1.97245	0.098153	0.209004	1.41605	4.11918	3.01729	0.14997	0.38231	25.0867	7.13647
Taupo-P Y5-3_9	75.4796	0.246089	13.2646	2.19064	0.124375	0.197865	1.40224	4.12931	2.96521	0.173702	0.234559	25.455	7.09453
Taupo-P Y5-3_11	75.7066	0.24968	13.2758	1.95355	0.115377	0.204346	1.46315	4.05888	2.97266	0.185566	2.54189	25.4676	7.03154
Taupo-P Y5-3_13	75.6808	0.262336	13.1393	2.09952	0.101627	0.209504	1.37257	4.23945	2.89487	0.189106	2.58451	26.1431	7.13432
Taupo-P Y5-3_14	76.663	0.283619	12.9675	1.21626	0.0650984	0.0438318	1.06039	4.47014	3.23008	0.147879	0.49252	23.7341	7.70022
Taupo-P Y5-3_16	75.5028	0.302675	13.3424	2.01573	0.0905801	0.211813	1.46595	4.01918	3.04884	0.179995	0.14972	24.7644	7.06802
Taupo-P Y5-3_17	75.1965	0.299238	13.4559	1.96348	0.114652	0.191747	1.53311	4.29628	2.94911	0.184682	0.859223	25.498	7.24539
Taupo-P Y5-3_18	75.9613	0.257884	13.1538	1.95297	0.0725083	0.191858	1.4012	4.13509	2.8734	0.202255	3.91899	26.436	7.00849
Taupo-P Y5-4_1	75.4489	0.2597	13.3406	2.03097	0.13657	0.234527	1.60525	4.14673	2.79675	0.199212	2.45145	26.9773	6.94348		10.23	1021	0.63	452	0.243	0.94	48.1	9.5	77.2	86	16.56	127.2	5.32	0.83	3.84	379	14.66	32.5	3.76	16.1	3.09	0.672	3.27	0.446	3.18	0.583	2.25	0.284	2.01	0.486	3.53	0.378	0.98	13.3	5.8
Taupo-P Y5-4_3	75.0953	0.266326	13.5046	2.19503	0.0776215	0.224229	1.5883	4.20234	2.84617	0.179496	2.3753	26.3847	7.04851		16.6	1800	1.2	690	0.4	10.8	39	14.2	133	158	31.6	228	10	1.31	6.35	660	26.5	54.2	6.6	24.7	5.1	1.32	5	0.76	7.49	1.24	3.25	0.52	5.7	0.79	3.64	0.622	1.72	23.4	8.88
Taupo-P Y5-4_4	75.3247	0.247266	13.4443	2.0327	0.070564	0.214236	1.76813	4.12652	2.77154	0.192198	4.73587	27.1779	6.89805		8.51	755	1.47	310	0.456	1.06	38.4	8.06	64.1	76.2	15.49	116.9	4.46	0.69	3.37	355	13.16	27.72	3.18	13.31	2.78	0.593	2.73	0.427	2.74	0.56	1.79	0.286	1.75	0.45	3.21	0.313	0.75	10.35	5.46
Taupo-P Y5-4_5	75.5959	0.30655	13.4289	2.06122	0.119163	0.225339	1.56058	4.01207	2.69035	0.192237	3.58664	28.0989	6.70242		3.4	310	0.23	141	0.084	0.308	19.3	5.17	21	120	5.3	37	1.68	0.22	1.09	158	4.9	10.5	1.15	4.4	0.83	0.469	0.87	0.147	0.99	0.21	0.61	0.098	0.68	0.169	0.95	0.117	0.29	4.5	1.77
Taupo-P Y5-4_7	77.7414	0.105102	12.4416	1.213	0.0929925	0.0922279	1.02398	3.89558	3.3941	0.204423	2.74009	22.9049	7.28967		10.36	742	0.71	352	0.53	0.84	41.5	12.6	131.3	76.4	22.3	112	6.25	1.03	6.59	652	21.6	45.4	4.78	19	3.88	0.68	4.09	0.509	3.57	0.67	2.47	0.36	2.95	0.93	3.04	0.48	1.32	14.6	10.89
Taupo-P Y5-4_8	78.1037	0.107048	12.3059	1.19924	0.0511967	0.11548	1.07931	3.66594	3.3721	0.222323	4.50777	23.1617	7.03804		10.98	743	0.98	359	0.57	1.18	42.9	13.5	134	84.8	23.3	111.8	6.1	0.94	6.62	689	21.7	45.1	5.26	19.7	4.5	0.66	4.05	0.53	3.91	0.92	2.47	0.38	2.76	0.79	3.3	0.56	1.18	15.5	11.04
Taupo-P Y5-4_9	77.7028	0.12837	12.5907	1.35966	0.127339	0.128184	1.12217	3.4926	3.34817	0.215522	3.0582	23.2075	6.84077		10.61	841	1.24	395	0.344	0.87	36	12.1	131	86	18.5	110	6.3	0.74	6	610	18.2	38	4.28	16.9	3.12	0.77	3.19	0.61	2.83	0.51	1.94	0.27	1.87	0.54	2.68	0.37	1.02	14.2	7.9
Taupo-P Y5-4_11	75.8777	0.180208	13.0088	1.85824	0.0844308	0.153244	1.34784	4.31815	3.17141	0.17656	0.115398	23.9256	7.48955		15.82	1270	0.56	672	0.363	2.57	77.5	16.53	132.5	120	30.4	217.5	8.81	1.47	6.35	663	25.3	57.1	6.62	26.2	5.15	1.38	5.18	0.79	5.24	1.23	3.7	0.481	3.7	0.98	5.88	0.629	1.61	22.4	10.64
Taupo-P Y5-4_12	75.113	0.2455	13.7775	1.99866	0.0636176	0.230783	1.7426	3.98696	2.84139	0.189722	5.86118	26.4353	6.82835		16	1480	2.82	586	0.98	2.64	64	15.2	130	135	28.1	217	8.16	1.39	5.76	655	23.1	50.8	5.7	22.5	5.4	0.86	4.52	0.67	5	1	3.2	0.52	3.64	0.81	5.8	0.476	1.58	18.9	9.4
Taupo-P Y5-4_13	75.1564	0.300789	13.5528	2.01181	0.104093	0.222779	1.50274	4.47665	2.67197	0.199307	1.37065	28.1277	7.14862		15.71	1627	0.95	701	0.442	2.01	69.3	15.14	115.2	145.1	28.49	209.3	8.3	1.14	5.77	628	24	54.6	6.3	25.1	5.15	1.08	5.69	0.891	5.08	0.954	3.17	0.43	3.5	0.86	5.22	0.66	1.54	20.8	10.03
Taupo-P Y5-4_14	76.6113	0.191943	13.0272	1.68327	0.0973505	0.0876807	1.15066	4.12205	3.0285	0.160349	3.32758	25.2968	7.15055		13.1	1080	0.51	502	0.297	1.37	65.6	13.3	115	109	25.9	192	7.64	1.1	5.63	594	21.1	48.3	5.65	22.6	4.28	1.12	4.92	0.81	4.54	0.97	2.91	0.407	3.02	0.76	5.05	0.495	1.31	16.8	8.9
Taupo-P Y5-4_16	78.655	0.131013	12.4506	1.09688	0.0515637	0.105937	1.05193	2.96618	3.49084	0.20171	7.55772	22.5318	6.45702		7.69	810	2.08	247.1	0.79	1.21	31.7	11.36	148	62.8	15.5	91.1	5.8	1.33	6.99	662	19.36	38.4	4.08	14.5	2.74	0.445	2.59	0.398	2.73	0.495	1.58	0.281	1.88	0.551	2.72	0.552	1.75	14.44	12.48
Taupo-P Y5-4_17	77.8025	0.15421	12.5106	1.20402	0.0582315	0.0707454	1.0495	3.68813	3.46204	0.228033	3.45057	22.473	7.15017		10.38	770	1.08	388	0.58	0.45	43.2	12.52	131.5	77	20.6	102.2	6.45	1.15	7.18	664	20.4	45.9	4.78	18.1	3.6	0.58	4.4	0.62	3.35	0.65	2.55	0.37	2.82	0.67	3.14	0.64	1.47	14.8	10.3
Taupo-P Y5-4_18	75.7107	0.258787	13.3594	1.99206	0.0815123	0.244021	1.52281	4.0568	2.77387	0.185556	2.53681	27.2943	6.83067		16.75	1775	1.41	768	0.501	2.05	41.3	16.8	125.1	148.4	31.5	221.1	9.43	1.4	6.57	660	25.3	55.1	6.4	26.7	5.1	1.23	5.8	1.05	5.67	1.03	4.09	0.601	3.32	0.96	5.82	0.6	1.8	20.7	9.96
Taupo-P Y5-4_19	76.1948	0.200928	13.038	1.87101	0.10125	0.166276	1.35596	3.99535	3.07649	0.167951	1.01499	24.7668	7.07184		15.29	1270	0.52	707	0.38	1.71	69.7	16.8	107.1	121.6	31.2	228.3	8.64	1.1	6.42	674	26.7	56	6.92	27.4	5.53	1.21	5.7	0.99	5.65	1.09	3.28	0.56	4.03	1	6.72	0.695	1.68	21.6	10.68
Taupo-P Y5-4_20	76.4609	0.187019	12.9819	1.66535	0.10413	0.138515	1.45927	3.82857	3.17427	0.150554	3.75293	24.0877	7.00284		13.57	1272	4.04	461	1.29	17.2	62.7	17.2	123	115	29.8	195	7.4	1.08	8.2	742	26.3	54.2	6.21	23.6	4.9	1.01	5.2	0.67	4.7	1	3.4	0.47	3.5	0.78	5.24	0.64	1.56	22	11.8
Taupo-P Y5-4_21	75.2362	0.31628	13.3425	2.01919	0.0929429	0.236789	1.54093	4.40139	2.81371	0.178919	2.68821	26.7392	7.2151		14.9	1689	1.2	829	0.55	1.53	49.5	16.3	92	137	27.8	198	8.01	0.89	5.4	584	21.7	45.6	5.81	22.1	4.6	1.04	4.24	0.75	3.6	0.89	2.88	0.232	2.93	0.66	5.86	0.55	1.54	18.4	7.7
Taupo-P Y5-4_22	75.2105	0.275046	13.5593	2.11058	0.0819409	0.216445	1.53188	4.07907	2.93516	0.180739	3.04669	25.624	7.01424		15.86	1741	1.34	826	0.46	2.4	64	18.1	103	140.8	30.1	211	8.77	1.04	7.9	642	24.8	52.9	6.41	22.9	5.5	1.24	6	0.81	5.2	1.31	3.51	0.63	3.24	0.99	5.7	0.53	1.76	22.7	9.4
Taupo-P Y5-4_24	75.146	0.281925	13.3769	2.17256	0.116447	0.228615	1.54175	4.19762	2.93818	0.17574	0.288696	25.5757	7.1358		15.96	1697	1.34	829	3.5	4.9	41.8	17.7	102.2	145.1	30.2	218.9	9.09	1.39	8	642	25.4	53.5	6.55	25.6	5.06	1.28	4.44	0.71	5.02	1.06	3.11	0.51	3.19	0.96	5.84	0.78	2.55	22	9.6
Taupo-P Y5-4_25	78.0129	0.120782	12.5252	1.25797	0.0644951	0.0885883	1.07802	3.63294	3.21911	0.228799	5.24688	24.2343	6.85205		10.26	808	1.13	406	0.58	1.06	41	12.5	92.9	77.7	21	104.8	6.75	1.19	7.4	699	22.4	42.6	4.6	17.4	4.46	0.68	4.3	0.6	3.76	0.77	2.18	0.35	2.26	0.67	3.67	0.57	1.63	15.1	10.47
Average	76.0275	0.235864	13.1592	1.83266	0.098356	0.18296	1.39555	4.05367	3.01427	0.182107	2.51363	25.3404	7.06794		12.599	1175.05	1.272	531.055	0.667	2.8549	49.325	13.729	110.455	111.095	24.182	162.455	7.168	1.0715	6.0715	600.6	21.329	45.421	5.252	20.4405	4.2385	0.91595	4.309	0.6594	4.2125	0.8571	2.717	0.402	2.9375	0.7403	4.3505	0.53285	1.452	17.3245	9.155
Standard Deviation	1.09756	0.0633542	0.404808	0.344213	0.0306147	0.0631058	0.208333	0.314268	0.228197	0.0301518	1.81921	1.63521	0.270408		3.65309	447.65	0.873671	210.085	0.716594	4.07784	15.2695	3.40776	29.996	30.1753	7.16116	59.8134	1.96919	0.300145	1.69297	140.886	5.37012	11.5878	1.4516	5.65269	1.21858	0.30724	1.27989	0.214765	1.43067	0.290492	0.828957	0.136589	1.05057	0.219266	1.53571	0.150475	0.464459	4.86891	2.48361
Waimihia - K3_1	76.1382	0.21897	13.1617	2.05677	0.0832314	0.143499	1.35747	3.94976	2.89035	0.172691	3.08144	26.3422	6.84011		15	1237	0.55	691	0.47	1.83	86.4	15.9	97.8	117	30.3	219	8.11	1.37	6.84	612	25.8	59.2	6.08	26	5.4	1.26	4.68	0.8	5.33	1.16	3.38	0.55	3.15	1.2	6.13	0.79	1.82	19.9	10.52
Waimihia - K3_3	75.9511	0.240929	13.1486	1.98164	0.0992264	0.148844	1.35413	4.14291	2.93257	0.182388	2.69162	25.8991	7.07548		15.85	1273	0.68	673	0.39	2.79	75.4	16.3	105.1	122.6	31.7	231	8.96	1.2	7.34	648	25.8	60.7	6.82	28.2	5.31	1.2	5.12	0.93	5.19	1.15	3.5	0.588	4.04	1.1	6.1	0.79	1.95	20.6	10.74
Waimihia - K3_4	75.8633	0.220034	13.0404	2.07262	0.102496	0.15299	1.33856	4.38734	2.82233	0.182723	1.02555	26.8797	7.20967
Waimihia - K3_5	75.746	0.211376	13.2963	1.78994	0.110662	0.138137	1.43403	4.34334	2.93019	0.177125	1.70241	25.8502	7.27353		10.21	863	0.55	470	0.33	2.47	34.4	11.21	68.9	82	20.7	145.1	5.57	0.89	4.73	438	17.4	38.8	4.7	17.9	3.08	0.82	3.83	0.54	3.29	0.7	2.36	0.37	2.41	0.62	3.59	0.47	0.99	15	7.2
Waimihia - K3_6	75.96	0.221743	13.2791	1.78591	0.138304	0.157461	1.33344	4.31033	2.81362	0.188351	2.7903	26.9973	7.12395		14.03	1167	0.74	651	0.352	2.11	89.5	15.7	99.8	120.8	31.2	212.6	9.05	1.16	6.86	652	25.78	57.6	6.48	26.4	5.04	1.1	4.4	0.79	5.54	1.04	3.37	0.55	3.38	0.99	6.1	0.8	1.71	20.16	10.61
Waimihia - K3_8	76.5248	0.195637	13.1823	1.65513	0.0771239	0.115584	1.26312	3.99257	2.9938	0.141762	1.74546	25.561	6.98638		14.71	1381	0.62	704	0.354	2.26	106	16.7	111.9	126.8	33.4	215.9	10	1.42	6.49	761	27.6	57.2	7.24	29.7	6	1.15	6	0.93	5.63	1.09	2.84	0.62	3.73	0.94	6.09	0.539	1.74	22.3	11.19
Waimihia - K3_9	75.9009	0.280285	13.2948	1.83342	0.0852248	0.135019	1.34701	4.15356	2.96977	0.201574	2.48014	25.5579	7.12333		15.19	1278	0.56	588	0.436	2.18	60.9	14.82	102.5	101	26.2	224.9	8.76	1.01	6.97	596	21.7	54.2	7.22	26.1	4.69	1.19	5.66	0.77	4.49	1.018	3.49	0.46	2.93	0.78	6.22	0.72	1.78	17.7	9.21
Waimihia - K3_10	76.1867	0.202241	13.1778	1.7309	0.0980355	0.1701	1.31932	4.25256	2.8624	0.181355	2.75632	26.6163	7.11497		13.43	980	0.53	665	0.468	1.66	64.9	15.8	87.1	104.2	31	217.4	6.86	1.21	5.95	520	25.1	57.3	5.87	22.1	4.74	1.24	4.54	0.72	5.21	1.15	3.3	0.512	2.85	0.98	5.91	0.58	1.5	17.6	11.8
Waimihia - K3_11	75.8445	0.22719	13.1877	1.84585	0.116294	0.169934	1.35551	4.41945	2.83355	0.172828	1.20828	26.7666	7.253		13.69	1018	0.89	668	0.349	3.6	63.2	17.9	84.4	107.2	30.6	210	7.22	1.38	6.05	541	24.5	56.4	5.97	21.3	5	1.25	4.33	0.74	4.58	1.13	2.99	0.473	2.93	1.06	5.56	0.621	1.2	19.5	10.94
Waimihia - K3_13	75.954	0.212199	13.3127	1.78757	0.108596	0.16725	1.29044	4.20845	2.95875	0.156018	2.08362	25.671	7.1672		15.8	1630	0.81	782	0.386	2.51	92	17.56	129	151	35.4	224	11.76	1.48	6.02	863	30.3	55.9	7.09	35.1	6.7	1.11	6.1	1.13	6.62	1.15	3.24	0.64	4.61	1.07	6.06	0.75	2.1	26.3	11.65
Waimihia - K3_14	76.0922	0.245284	13.1109	1.79924	0.133041	0.141485	1.34049	4.1791	2.9583	0.181694	1.7014	25.7216	7.13739		15.29	1182	2.7	725	0.48	12.2	40.7	19.4	106.7	123.3	32.2	226	8.78	1.34	7.09	686	28.6	57.7	7.13	25.8	5.67	1.3	4.6	0.8	5.9	1.2	3.52	0.46	3.46	0.95	6.2	0.59	1.91	23.1	11.4
Waimihia - K3_15	76.0077	0.195005	13.206	1.96548	0.104188	0.16919	1.30509	4.12899	2.91833	0.140816	0.287566	26.0449	7.04732		14.61	1540	1.04	863	0.32	2.34	107.2	19.8	135	146.6	35.3	219	12.12	1.44	4.93	880	31.5	65.7	7.04	34.3	7.3	1.28	6.56	1.12	5.83	1.42	3.52	0.72	4.68	1.13	6.38	0.69	2.34	25	12.62
Waimihia - K3_16	76.0695	0.19693	13.1396	1.76818	0.116451	0.161875	1.37194	4.17311	3.00247	0.193334	2.39077	25.3357	7.17558
Waimihia - K3_17	77.0633	0.150647	12.6768	1.61116	0.11089	0.106543	1.0288	4.07993	3.17186	0.17062	1.90485	24.2959	7.2518		15.1	1072	0.34	613	0.22	2.53	71	15.2	125.6	88.2	28.5	191	8.86	1.25	5.23	675	24.8	65.4	7.34	28.3	5.77	1.13	5.77	0.95	4.93	1.07	3.65	0.55	3.96	0.89	5.35	0.74	2.14	19.8	10.45
Waimihia - K3_18	76.0923	0.22225	13.0534	1.70115	0.15342	0.170488	1.40416	4.27145	2.93139	0.186855	2.01204	25.9578	7.20283		14.36	1112	0.66	761	0.43	3.36	80.1	21.5	108.2	106	28.8	215	8.19	1.3	4.86	598	24.4	65.6	6.37	25.6	4.62	1.2	4.95	0.73	4.2	1.03	3.2	0.434	2.53	0.83	5.71	0.66	2.08	21.1	10.3
Waimihia - K3_19	76.1311	0.20061	13.2137	1.93279	0.118532	0.167261	1.37949	4.12536	2.73114	0.173836	3.07359	27.8752	6.85651		14.33	1192	0.68	853	0.42	3.3	91.6	18.3	107.5	118.1	30.8	217.3	8.68	1.3	4.8	655	25.8	70.8	6.88	27.3	5.38	1.11	5.41	0.89	5.53	1.21	3.46	0.533	3.84	1.13	5.88	0.63	2.08	19.6	11.23
Waimihia - K3_20	78.3068	0.149645	12.3481	1.22232	0.0527756	0.0930671	1.05226	3.54467	3.23035	0.219421	2.73286	24.241	6.77501
Waimihia - K3_21	76.5282	0.194025	13.4929	1.94585	0.0424204	0.178515	1.73163	3.3538	2.53264	0.177876	7.80108	30.2168	5.88644		7.39	648	1.42	413	0.549	2.2	26.1	11.74	58.7	73.6	15.96	118.7	4.2	0.743	2.72	348.4	13.54	36.5	3.31	12.66	2.71	0.64	2.75	0.363	2.82	0.587	1.74	0.26	1.86	0.455	3.28	0.35	0.87	10.98	5.87
Waimihia - K3_22	76.0415	0.196795	13.2167	1.89816	0.0838369	0.153339	1.33753	4.18705	2.88512	0.161001	2.32362	26.3564	7.07217		14.06	1110	1.07	929	0.56	7.5	37.2	23.7	100.3	109.8	28.6	204	7.46	1.57	3.89	605	26.5	71.7	6.45	21.3	5.2	1.35	5.58	0.7	4.52	1.07	3.02	0.42	3.38	0.92	5.44	0.544	1.21	20.2	9.94
Waimihia - K3_23	76.1462	0.22057	13.3025	1.79182	0.0783485	0.142094	1.34021	4.20964	2.76866	0.17537	3.28108	27.5029	6.9783		14.51	1114	0.57	981	0.44	2.54	95.4	21.5	105.9	115.9	31.7	219	8.76	1.29	3.98	641	28.1	74.8	6.51	24.2	5.45	1.29	4.3	0.89	5.21	1.25	3.75	0.51	3.74	1.12	5.52	0.67	2.13	20.8	11.7
Waimihia - K3_24	76.2294	0.218481	13.3231	1.91274	0.0969067	0.165297	1.26019	3.74996	3.04392	0.217312	5.40734	25.0432	6.79388		14.35	1097	0.54	857	0.33	2.26	82.7	18	104.9	109.3	28.7	214	8.41	1.45	3.57	579	24.4	63.4	6.11	24.3	5.48	1.23	5	0.84	4.9	1.16	3.04	0.48	3.16	0.69	4.98	0.59	1.4	18	10.08
Waimihia - K3_25	75.6578	0.220956	13.2251	2.09688	0.0919314	0.140756	1.39032	4.20642	2.9698	0.204859	2.94693	25.4757	7.17622		15.71	1255	0.7	962	0.42	3.5	79.7	18.7	114.7	117.9	31.3	229	8.39	1.17	3.98	643	26.8	67.1	6.77	25.5	5.71	1.34	5.1	0.96	5.07	1.16	3.47	0.63	3.36	0.91	6.2	0.73	1.76	19.8	11
Average	76.2016	0.210991	13.1541	1.82661	0.100088	0.149488	1.33342	4.10772	2.91597	0.179991	2.61038	26.1913	7.02368		14.0853	1165.74	0.823684	728.895	0.405474	3.32316	72.8632	17.3542	102.842	112.7	29.5979	208.047	8.42842	1.26174	5.38421	628.495	25.18	59.7895	6.38842	25.3716	5.22368	1.16789	4.98316	0.820684	4.98895	1.09184	3.20211	0.513684	3.36842	0.935	5.61579	0.644947	1.72158	19.8653	10.4447
Standard Deviation	0.557269	0.0280648	0.235695	0.188236	0.0258194	0.0222395	0.132262	0.260234	0.144367	0.0201668	1.53365	1.27188	0.294439		2.0374	220.891	0.516637	154.693	0.0828884	2.48923	24.0838	3.13948	18.6677	19.0782	4.63663	28.6569	1.81854	0.206362	1.36986	125.323	4.13706	9.77275	0.981316	5.16082	1.05116	0.174374	0.894502	0.180638	0.89215	0.183368	0.481093	0.10591	0.71507	0.19357	0.850825	0.118325	0.419911	3.3618	1.59417
Unit K - K4_1	76.295	0.208179	12.9213	1.80411	0.0738699	0.158332	1.29234	4.14356	3.10337	0.116545	0.726432	24.5846	7.24693		7.54	1230	0.93	640	0.91	Below LOD	Below LOD	19	122	112	32.5	220	9.3	1.39	5.93	670	25.6	56.3	6.36	24.4	5.6	1.05	5.5	0.87	5.77	1.2	3.16	0.43	3.72	0.5	6.1	0.55	1.41	21.1	10.2
Unit K - K4_2	76.1294	0.202414	13.3371	1.78252	0.089307	0.155684	1.37619	4.07995	2.84745	0.163031	0.0949427	26.736	6.9274		7.23	1187	Below LOD	604	Below LOD	Below LOD	Below LOD	18.5	108.7	122.2	30.9	223	8.99	1.28	4.8	649	24.9	53.4	6.37	26.4	6.03	1.08	6.8	0.84	5.5	1.2	3.59	0.55	3.29	0.64	5.9	0.82	1.97	18.9	9.6
Unit K - K4_3	76.2538	0.202723	13.1195	1.79373	0.0582265	0.143473	1.31285	4.05208	3.06369	0.162817	1.3431	24.8895	7.11577
Unit K - K4_4	76.5929	0.177105	13.0669	1.68176	0.0892382	0.125249	1.27101	4.12319	2.87259	0.153633	2.75713	26.6634	6.99578
Unit K - K4_5	76.2582	0.199172	13.0535	1.97224	0.0896272	0.153383	1.28275	4.05857	2.93256	0.132711	1.81553	26.0039	6.99114		7.33	1140	0.74	586	0.64	4.8	54.8	17.7	108	112	32.4	217	8.34	1.18	5.24	621	25.8	56.6	6.5	25.1	6.7	1.1	5.2	0.8	5.8	1.23	3.54	0.52	3.39	0.54	7.2	0.73	1.9	18.1	11
Unit K - K4_6	76.4683	0.19109	13.2113	1.6277	0.0655326	0.136535	1.25967	4.0221	3.0178	0.150002	1.15187	25.3391	7.0399		7.27	1230	0.84	571	0.69	11.5	47.1	15.1	103.1	112.7	31.7	210	8.61	1.26	4.95	637	25.8	53.9	6.77	27.3	5.92	1.18	5.8	0.99	5.83	1.31	3.45	0.48	3.8	0.63	7.3	0.72	1.73	18.1	10.7
Unit K - K4_7	76.2347	0.197942	13.1834	1.83859	0.0680426	0.145773	1.28931	4.10275	2.93945	0.134165	1.20568	25.935	7.0422		6.97	1148	0.74	553	0.7	1.57	37.9	15.2	99.1	106.9	31.6	209.3	7.94	1.01	4.76	634	25.5	55.8	6.43	24.7	5.34	1.19	4.71	0.88	5.79	1.25	3.43	0.42	3.63	0.51	6.86	0.683	1.7	17.4	10.89
Unit K - K4_8	76.9899	0.217177	12.9384	1.29681	0.0812991	0.0412656	0.880149	4.17777	3.37715	0.149436	2.28133	22.7973	7.55492		4.85	849	0.7	504	0.56	0.97	54.9	11.7	76.4	80	23.9	165	6.42	1.1	3.64	479	19.2	40.7	4.5	16.7	4.18	0.92	3.83	0.56	3.82	0.86	2.25	0.43	2.85	0.404	5.35	0.5	1.26	14.3	7.71
Unit K - K4_9	76.8443	0.178786	13.0203	1.77131	0.0680285	0.0566313	1.19911	3.92564	2.93585	0.134138	1.18523	26.1745	6.86149		6.42	1120	0.4	518	0.49	2.8	27.8	16.1	106	111	31.2	209	8.5	1.12	5.06	627	25.8	53.8	5.4	22.5	5.4	1.13	5.4	0.83	5.9	1.19	3.04	0.46	2.56	0.45	5.6	0.52	1.59	17.2	9.8
Unit K - K4_10	76.2273	0.202862	13.0895	1.85584	0.0784697	0.137866	1.3239	4.12648	2.95779	0.154377	0.315372	25.7717	7.08427		7.93	1280	0.82	635	0.64	1.77	72	17.4	124	125	35	245	9.54	1.57	6.5	712	28	63.5	7.66	28.7	6.4	1.17	5.42	0.89	5.51	1.35	3.84	0.575	3.95	0.68	7.11	0.78	2.36	19.6	12.1
Unit K - K4_11	76.5043	0.183816	13.1197	1.66268	0.090424	0.142063	1.3141	4.05062	2.93224	0.138507	2.6807	26.0907	6.98286		7.47	1260	1.13	626	0.85	2.28	68.9	18.1	124	122.8	34.8	235	9.93	1.23	6.29	724	28.8	61.1	7.16	29.7	6.72	1.18	6.8	0.95	6.5	1.2	3.42	0.53	4.71	0.56	6.7	0.8	1.93	21.3	11.7
Unit K - K4_12	76.0995	0.186367	13.1502	1.78089	0.093857	0.157157	1.36032	4.11764	3.05405	0.139604	1.03145	24.9176	7.17168		7.93	1320	0.85	674	0.63	2.17	63.9	19.6	125	127	35.9	234	9.8	1.67	7.07	743	29.3	65.1	6.88	29	7.4	0.95	6.6	0.87	5.7	1.05	3.79	0.497	3.86	0.54	6.8	0.79	2.06	22.7	12.6
Unit K - K4_13	76.2658	0.192225	13.1177	1.73204	0.061112	0.139902	1.32588	4.12994	3.03543	0.149399	0.00140911	25.1252	7.16537		7.12	1182	0.56	587	0.44	2.08	69.5	16.9	102.4	117	33.4	211	9.08	2.25	6.4	649	26.9	56.9	6.37	24.6	5.19	1.17	6	0.9	5.56	1.39	3.57	0.425	3.71	0.47	5.45	0.73	1.43	19.4	10.6
Unit K - K4_15	76.2602	0.211432	13.2034	1.72908	0.0737122	0.139482	1.34361	4.09334	2.94572	0.149507	3.83017	25.8885	7.03906		7.48	1258	0.7	629	0.62	6.2	48	18.4	117	120.2	33.1	223	10	1.93	7.49	680	27.3	58.7	6.2	27.3	5.07	1.12	5.35	0.7	5.5	1	3.1	0.63	3.69	0.58	5.95	0.64	1.75	21.3	10.81
Unit K - K4_16	76.1861	0.233905	13.0804	1.78107	0.0807933	0.174078	1.32344	4.10448	3.03569	0.142795	1.66946	25.0968	7.14017		7.94	1210	0.72	650	0.71	1.9	80.8	18.5	124	138	37.7	227	10.4	2.3	7.9	750	29.6	62.8	6.96	31.6	6.5	1.43	5.7	1.03	6.09	1.48	3.72	0.461	4.77	0.55	7.9	0.73	1.39	21.9	12.2
Unit K - K4_17	76.2493	0.18709	13.1591	1.91553	0.0813336	0.138568	1.32343	3.99669	2.94894	0.151765	0.820029	25.8565	6.94563		8.32	1360	0.79	641	0.82	2.02	75.6	18.4	123	124.1	36.5	244	9.85	2.77	8.18	705	28.7	60.5	7.4	28.5	6.6	1.31	6.4	0.95	5.69	1.2	3.93	0.494	3.57	0.52	6.9	0.85	1.57	20.3	12.5
Unit K - K4_18	76.2638	0.204395	13.1534	1.72081	0.109947	0.151385	1.32255	4.1125	2.96118	0.140784	1.06316	25.7546	7.07368
Unit K - K4_19	76.118	0.196308	13.1957	1.85677	0.0980411	0.154587	1.32447	4.12953	2.92663	0.138009	1.51522	26.0088	7.05616		7.4	1240	0.83	603	0.82	Below LOD	70.5	18.2	117	118	35.3	226	9.5	1.94	7.79	647	26	58.4	6.54	26.8	5.8	1.33	7.1	0.85	5.83	1.22	3.5	0.62	3.79	0.534	6.6	0.69	1.28	18.2	11.9
Unit K - K4_20	75.6396	0.225428	13.4111	1.86618	0.0729327	0.145684	1.47404	4.19528	2.96969	0.124004	0.549328	25.4706	7.16497		8.15	1372	0.98	646	0.61	2.56	35.7	17.71	117	132.9	35.3	248	9.6	1.96	7.8	674	27.8	57.9	6.93	29.1	5.85	1.15	5.71	1	5.93	1.23	3.82	0.56	3.81	0.67	6.97	0.79	1.42	19.9	11.09
Unit K - K4_21	76.1	0.224176	13.0478	1.80184	0.0932395	0.148689	1.31958	4.27635	2.98834	0.148833	0.375985	25.4656	7.2647		6.71	1088	0.75	629	0.68	1.95	61.7	17.8	103	118	34.8	220	9.16	2	7.14	646	28	55.7	5.99	24.4	5.44	1.04	4.67	0.83	6	1.2	3.55	0.46	3.63	0.62	6.1	0.71	1.35	19.3	11.4
Unit K - K4_23	76.146	0.182644	13.0447	1.84	0.0686029	0.154247	1.30435	4.22993	3.02954	0.127225	0.231017	25.1345	7.25947		7	1159	0.73	619	0.64	2.29	49.1	16.5	109.6	116.5	34.7	223	8.93	2.27	7.49	666	28.1	56.1	6.39	26.7	5.64	1.1	6	0.81	5.91	1.1	3.76	0.49	3.63	0.65	6.29	0.75	1.65	18.8	12.06
Unit K - K4_24	76.0352	0.18378	13.1665	1.85457	0.0486677	0.175607	1.29634	4.31064	2.92869	0.149094	2.05677	25.9622	7.23933
Unit K - K4_25	75.675	0.210051	13.4141	1.83665	0.0912062	0.146567	1.5062	4.17083	2.94938	0.13747	0.504917	25.658	7.1202
Average	76.2538	0.199959	13.1393	1.77403	0.07937	0.140096	1.30546	4.11869	2.98927	0.14295	1.26984	25.5358	7.10796		7.28111	1201.83	0.777059	606.389	0.673529	3.124	57.3875	17.2672	111.628	117.572	33.3722	221.628	9.105	1.67944	6.35722	661.833	26.7278	57.0667	6.48944	26.3056	5.87667	1.14444	5.72167	0.863889	5.70167	1.20333	3.47	0.501778	3.68667	0.558222	6.50444	0.710167	1.65278	19.3222	11.0478
Standard Deviation	0.299629	0.0155598	0.124968	0.131286	0.0145397	0.0310174	0.112227	0.0863131	0.104518	0.0117208	0.963619	0.807118	0.147004		0.784098	118.075	0.160731	45.9938	0.123892	2.66247	15.5062	1.85264	12.4836	12.2498	3.05918	18.6623	0.927845	0.516805	1.35047	60.2292	2.3711	5.30948	0.72091	3.32998	0.757962	0.125146	0.839483	0.110727	0.528374	0.141795	0.396113	0.0647888	0.520102	0.0780856	0.70184	0.100653	0.301931	2.0078	1.21686
Whakatane-K5_1	78.3373	0.0881612	12.5019	0.799393	0.067549	0.098072	0.708624	3.68635	3.71262	0.162854	3.27273	21.1003	7.39897
Whakatane-K5_2	78.1323	0.139411	12.6316	0.791675	0.0158093	0.110665	0.635493	3.64804	3.89499	0.153159	0.601071	20.0597	7.54303
Whakatane-K5_3	78.1457	0.0884643	12.3592	0.822889	0.0601058	0.103898	0.755496	3.7201	3.94405	0.183541	0.9265	19.8136	7.66415
Whakatane-K5_4	78.3408	0.117493	12.3782	0.919221	0.0384591	0.100111	0.677308	3.57629	3.85216	0.197736	3.227	20.3368	7.42845
Whakatane-K5_5	78.02	0.114316	12.4135	0.848176	0.0515555	0.115668	0.703691	3.77433	3.95874	0.141369	0.537841	19.7083	7.73307
Whakatane-K5_7	78.1604	0.123135	12.3828	0.918654	0.0480512	0.0946329	0.7018	3.6833	3.88717	0.149784	1.89031	20.1073	7.57047
Whakatane-K5_8	78.4204	0.125826	12.407	0.842786	0.0701231	0.0969027	0.764595	3.47453	3.79783	0.140393	2.10551	20.6487	7.27236
Whakatane-K5_9	78.341	0.0999777	12.516	0.85955	0.0299208	0.101414	0.653479	3.51004	3.88861	0.163611	0.489277	20.1463	7.39864
Whakatane-K5_10	78.0518	0.0970445	12.538	0.775929	0.0609903	0.101293	0.686141	3.69478	3.99391	0.179745	2.36338	19.5427	7.68869
Whakatane-K5_11	78.2764	0.110553	12.4924	0.843029	0.018461	0.0901031	0.673406	3.597	3.8987	0.159823	1.43804	20.0776	7.4957
Whakatane-K5_12	78.3499	0.116509	12.5208	0.838119	0.0376822	0.107633	0.657297	3.52849	3.84359	0.160924	3.4266	20.3846	7.37208
Whakatane-K5_13	78.2919	0.0888637	12.6087	0.839489	0.01761	0.097205	0.696014	3.65943	3.70076	0.158643	1.37174	21.1556	7.3602
Whakatane-K5_14	78.5564	0.101284	12.6303	0.79264	0.0579453	0.105016	0.694492	3.34339	3.71848	0.173192	2.94198	21.126	7.06186
Whakatane-K5_15	78.1658	0.112849	12.5483	0.952206	0.0243116	0.0838793	0.724109	3.71511	3.6734	0.142524	1.34357	21.2788	7.38852
Whakatane-K5_16	78.3883	0.10396	12.4877	0.868759	0.036298	0.0714683	0.634184	3.54862	3.86069	0.157122	0.256184	20.3042	7.40931
Whakatane-K5_17	78.4784	0.117838	12.485	0.867216	0.016286	0.108773	0.698585	3.44503	3.7828	0.174212	3.51059	20.7461	7.22783
Whakatane-K5_18	78.2821	0.137011	12.5704	0.789592	0.0125889	0.0880686	0.69344	3.57411	3.8527	0.158774	1.45297	20.3188	7.42681
Whakatane-K5_19	78.847	0.105279	12.502	0.734917	0.0380871	0.0702503	0.658774	3.22029	3.82345	0.177758	6.62479	20.6219	7.04374
Whakatane-K5_20	78.3192	0.106761	12.4593	0.783138	0.0368572	0.107321	0.762275	3.64648	3.77865	0.138128	1.26506	20.7268	7.42513
Whakatane-K5_21	78.2843	0.0649102	12.48	0.837338	0.031897	0.102422	0.630595	3.60984	3.95866	0.156653	1.46858	19.7755	7.56849
Whakatane-K5_22	78.2097	0.111042	12.4378	0.883964	0.0366862	0.11191	0.668064	3.59553	3.94524	0.143881	0.804763	19.8238	7.54078
Average	78.3047	0.108128	12.4929	0.838509	0.0384417	0.0984146	0.689422	3.58339	3.84606	0.160658	1.96755	20.3716	7.42944
Standard Deviation	0.182335	0.0172716	0.0791753	0.0531155	0.017754	0.0121166	0.0393546	0.132409	0.0927439	0.0158454	1.48516	0.517236	0.179537
Whakatane-P_1	78.045	0.0980424	12.6199	0.906098	0.0397259	0.0783817	0.826215	3.66762	3.71894	0.12533	2.14907	20.9858	7.38657		3.37	632	1.13	322	0.35	1.02	31.1	11.1	104	54	23	79	6.6	1.45	7.3	830	23.7	45.8	5.1	18.6	3	0.69	3.6	0.63	3.39	0.92	2.58	0.38	2.79	0.42	3.02	0.73	1.28	14.4	12
Whakatane-P_2	77.2974	0.173697	12.8491	1.58777	0.108832	0.10137	1.12778	3.67005	3.0839	0.166727	0.446932	25.0649	6.75395		8.4	1170	0.54	705	0.65	Below LOD	42.9	22.4	144	100	38.6	231	10.7	1.8	10.56	755	31.6	67.1	7.8	28.7	6.5	1.24	6.5	0.96	6.6	1.21	3.64	0.48	3.74	0.73	5.77	0.57	2.1	26.4	12.1
Whakatane-P_3	77.4722	0.193035	12.6345	1.53842	0.0437879	0.124668	1.10436	3.73294	3.15602	0.156942	3.67092	24.5474	6.88897		6.3	900	Below LOD	460	Below LOD	6.3	19.8	13.4	98	62	18	136	6.9	Below LOD	4.6	490	20.6	46.6	5.6	19.9	4.3	0.87	2.3	0.42	3.6	0.81	1.8	0.31	2.4	0.3	3.5	0.58	1.27	15.1	6.7
Whakatane-P_4	78.3933	0.0849474	12.4755	0.931898	0.0214209	0.10656	0.728105	3.61834	3.63992	0.152705	0.386733	21.5371	7.25825		4.6	688	Below LOD	427	0.75	0.77	44.3	14.9	140	65	27.9	105	8.8	1.7	8.4	1040	29.3	57	6.5	25.6	5.7	0.51	4.9	0.83	4.3	0.95	3.6	0.42	3.11	0.53	3.9	0.66	1.94	20.5	14.4
Whakatane-P_6	76.0398	0.194238	13.2623	1.87331	0.0812154	0.173676	1.40138	3.9802	2.99382	0.159468	1.21873	25.399	6.97402		7.38	1310	0.75	634	0.61	2.36	72	17.2	108	118	31.8	224	9.88	1.6	8.03	674	27.8	55.5	5.72	25.8	6.4	1.31	5.1	0.87	5.4	1.21	3.5	0.47	4.6	0.59	5.33	0.68	1.7	21.9	11.1
Whakatane-P_7	78.3763	0.107562	12.511	0.863827	0.050637	0.0700247	0.658281	3.56145	3.80089	0.144558	2.00045	20.6205	7.36234		4.6	700	Below LOD	470	0.49	Below LOD	Below LOD	17	138	50	28.8	95	8.5	1.13	8.8	930	27.2	57	6.7	23.7	4.1	0.5	4.2	0.62	4.3	1.19	3.6	0.39	3.7	0.53	2.5	0.77	1.37	18.3	12.6
Whakatane-P_8	78.2909	0.122094	12.6072	0.900083	0.0198662	0.0989815	0.769814	3.54201	3.64904	0.146017	0.0832177	21.4552	7.19105		4.18	640	0.66	420	0.51	Below LOD	Below LOD	13.8	112	58	24.3	85	7.9	1.52	7.5	880	25.1	49	5.9	19.1	3.1	0.73	4.02	0.6	3.7	0.91	2.45	0.49	2.31	0.57	2.41	0.65	1.29	19	11.3
Whakatane-P_9	77.1283	0.168252	12.7179	1.75344	0.0670201	0.104997	1.05701	4.04351	2.95954	0.16182	0.0411535	26.0609	7.00306
Whakatane-P_10	78.2795	0.113743	12.5493	0.86837	0.0537791	0.0736967	0.779796	3.67543	3.60641	0.174504	0.0365701	21.7057	7.28183		2.49	490	Below LOD	385	Below LOD	4.6	Below LOD	13.9	81	32.3	14.5	52	6.7	Below LOD	Below LOD	583	15.87	30.7	4.2	15.3	2.5	0.5	3.3	0.24	1.6	0.74	0.68	0.22	1.8	0.41	2.19	0.32	Below LOD	15.7	7.15
Whakatane-P_11	77.3585	0.190763	12.7638	1.50728	0.0466664	0.126307	1.07227	3.78379	3.15062	0.164856	2.52367	24.5534	6.93441		7.52	1094	1.06	524	0.55	Below LOD	26.5	17.7	121	93	36.2	209	9.5	1.24	10	683	28.4	57.6	6.8	27.8	5.9	0.89	6.5	1.11	6.48	1.41	4.2	0.56	3.94	0.5	6	0.53	1.9	21	11.3
Whakatane-P_12	77.2973	0.165301	12.7502	1.59435	0.0598218	0.119257	1.04162	3.8506	3.12152	0.150782	1.83886	24.7627	6.97212		7.49	1040	0.68	585	0.18	Below LOD	68.3	15.6	110	87.6	34.8	209	9.7	1.48	9.1	668	27.3	60.1	6.7	28.3	5.6	0.91	6	0.93	5.8	1.44	3.78	0.58	3.96	0.52	6.1	0.69	1.69	21.3	11.5
Whakatane-P_13	77.2032	0.207868	12.7875	1.53816	0.0734122	0.109935	1.03757	4.07953	2.9628	0.14076	0.858484	26.0575	7.04234		6.6	950	Below LOD	550	Below LOD	Below LOD	16.6	16.3	104	85	31.5	181	7.5	1.46	8.1	600	25.6	51	5.42	24.2	3.3	0.96	4	0.6	5.32	1.17	2.97	0.39	2.5	0.36	4	0.63	1.36	18.6	9.6
Whakatane-P_14	76.4931	0.200063	13.1267	1.78669	0.0577228	0.17455	1.34373	3.93819	2.87922	0.161471	1.13492	26.5673	6.81741		7.3	1240	0.72	610	0.87	Below LOD	36.2	17.6	113	106	27.4	184	8.06	1.31	8.5	600	22.7	52.4	5.94	22.2	4.78	0.98	4.3	0.65	4.18	0.91	2.2	0.31	2.88	0.5	4.19	0.66	0.95	20.1	8.8
Whakatane-P_15	77.2681	0.219028	12.8061	1.47961	0.0881121	0.148084	1.06399	3.81228	3.11471	0.159383	0.502644	24.8075	6.92699		8.5	1250	0.55	660	0.73	Below LOD	66	20.1	129	103	40.9	246	10.8	1.8	10.1	757	32	71	7.4	32	6.6	1.22	8.5	1.35	6.5	1.74	4.61	0.67	4.2	0.83	6.8	1.04	2.21	27.4	13.3
Whakatane-P_16	77.2013	0.245665	12.8513	1.82898	0.0831492	0.167672	1.17065	3.42093	3.03034	0.143207	5.50552	25.4761	6.45127		7.8	1110	Below LOD	630	Below LOD	2.8	23.3	20.4	134	83	32.7	202	9.4	2.3	11.4	608	26.6	56	5.99	23.3	4.6	0.71	5.7	0.72	4.9	1	3.3	0.52	2.3	0.53	5.6	0.87	1.57	24.3	10.3
Whakatane-P_17	77.2479	0.179164	12.5381	1.65224	0.0525469	0.128234	1.05824	4.02325	3.12029	0.152463	0.840501	24.7566	7.14354		7.93	1071	0.53	569	0.38	2.39	63.8	17.3	115	96	36.7	218	9.48	2.21	9	685	28.6	59.1	6.95	28.8	6.3	1.05	5.7	1.05	6.04	1.54	3.87	0.6	4.24	0.63	5.8	0.75	1.65	23.1	12
Whakatane-P_18	76.3163	0.229125	13.2263	1.69598	0.0795768	0.180768	1.36191	3.97799	2.93202	0.128773	2.3027	26.0286	6.91001
Whakatane-P_19	77.4298	0.195193	12.5931	1.44794	0.0908701	0.0975317	1.07593	3.97176	3.09789	0.158101	1.70215	24.9944	7.06965		9.5	1300	Below LOD	600	0.44	3.2	26.9	23.6	147	121	50	287	11.3	2.7	9.2	930	40	82	9.7	38.3	7.7	1.46	8.9	1.64	7.9	1.74	4.7	1.01	5.4	1.16	12.1	1.2	4.3	29.4	18.5
Whakatane-P_20	77.3923	0.158334	12.6831	1.41521	0.0334269	0.122361	0.759605	3.45032	3.98527	0.177487	3.50403	19.4196	7.43559		7.8	1140	1.19	599	0.38	2.81	46.6	19.1	200	68	39.4	244	9.6	1.64	10.8	690	30	61.4	7.3	29.4	6.1	1.01	Below LOD	1.03	6.1	1.2	3.36	0.74	3.86	0.64	6.9	0.91	2.21	33.2	12.2
Whakatane-P_21	78.4421	0.120709	12.2746	0.837864	0.0345597	0.107994	0.625867	3.51997	4.03631	0.188558	1.88052	19.4341	7.55628
Whakatane-P_22	77.3171	0.191732	12.7267	1.63389	0.0711279	0.125589	1.09934	3.83325	3.00121	0.158308	1.16293	25.762	6.83447		8.6	1270	Below LOD	617	0.43	Below LOD	75	18.6	129	104	39	244	10.6	2.37	9.5	784	32.7	69.4	8.5	32.8	7.3	1.29	7.2	1.28	7.6	1.5	4.18	0.66	4.34	0.75	7	0.87	2.43	23	13
Whakatane-P_23	77.3937	0.14507	12.7053	1.51566	0.0724775	0.134664	1.06039	3.86571	3.10696	0.165288	0.420101	24.9098	6.97267		6.73	920	0.72	538	0.49	Below LOD	26.5	16.5	106	86	32.1	184	8.5	1.38	7.38	596	25.5	49.8	5.82	21.7	5.39	1.08	6.2	0.867	5.8	0.9	3.33	0.456	2.75	0.57	6.6	0.71	1.05	17.1	9.97
Whakatane-P_24	77.0632	0.177474	12.6801	1.88717	0.0577216	0.127397	1.08758	3.64957	3.26978	0.157332	2.56573	23.5683	6.91936
Whakatane-P_25	77.3019	0.186391	12.5874	1.58474	0.0615132	0.112042	1.10211	3.85784	3.20599	0.148144	7.22694	24.1117	7.06383
Average	77.4187	0.169479	12.722	1.44287	0.0603746	0.121448	1.01723	3.77194	3.27598	0.155958	1.83348	23.8577	7.04792		6.68895	995.526	0.775455	542.368	0.520667	2.91667	42.8625	17.1842	122.789	82.7316	31.9789	179.737	8.96947	1.71118	8.79278	725.421	27.3984	56.7632	6.52842	25.5526	5.21947	0.942632	5.38444	0.863	5.23737	1.18368	3.28158	0.508211	3.41158	0.582632	5.24789	0.727368	1.79278	21.5684	11.4642
Standard Deviation	0.632422	0.0427414	0.227988	0.352623	0.0223617	0.0304879	0.212242	0.194577	0.350742	0.0142406	1.75278	2.20318	0.246709		1.94056	256.706	0.23964	102.634	0.178384	1.70215	20.1593	3.12628	25.5334	24.4328	8.46441	67.7297	1.42538	0.439629	1.58478	143.592	5.09036	11.083	1.2686	5.61727	1.51667	0.286412	1.76252	0.337933	1.57053	0.306362	0.995089	0.181085	0.960505	0.191742	2.31487	0.193989	0.754366	4.96298	2.60682
Tuhua-K6_1	74.7888	0.310722	9.57699	5.60398	0.0833268	0.0130868	0.255756	5.18378	4.18356	0.224628	0.248434	17.8768	9.36734		3.42	1800	Below LOD	1190	Below LOD	4.1	179	48.8	159	2.15	154	1420	117	11.8	7.2	15.2	96	209	25.8	102	22.8	2.27	27.6	3.86	27.2	5.57	17.5	2.62	15.6	2.32	29.4	8	2.1	27.9	20.1
Tuhua-K6_2	74.2663	0.283653	9.77153	5.93582	0.125366	0	0.25491	5.17773	4.18463	0.23076	1.04126	17.7474	9.36236		3.05	2000	Below LOD	1210	0.161	4.03	310	45.2	163	2.06	144	1320	116	10.4	7	14.8	100	196	25	110	24	2.18	25.7	4.5	26	5.11	16.3	2.5	16.5	2.31	26.9	8.4	2.34	26.3	18.2
Tuhua-K6_3	74.5657	0.270196	9.60868	5.81205	0.110692	0	0.273586	5.36175	3.99731	0.255118	1.37262	18.654	9.35906		4.5	2420	Below LOD	1620	Below LOD	5.6	360	70	203	2.23	206	1790	159	15.6	9.2	18.5	129	270	32	125	31	2.47	33	5.4	33	6.8	19.5	3	20	3.1	35	10.2	2.5	44	23
Tuhua-K6_4	74.1932	0.285712	9.66699	5.793	0.136033	0.0181075	0.273096	5.40242	4.23138	0.210771	0.318494	17.534	9.6338		2.54	1470	Below LOD	970	Below LOD	Below LOD	109	40.7	122	2.35	127	1110	94	8.5	5.6	14.7	80	165	19.3	81	19.7	1.84	18.5	3.31	22.1	4.45	13.2	1.93	13	2.03	24.2	6.4	1.85	22.6	16.7
Tuhua-K6_5	74.6577	0.299355	9.57714	5.78309	0.143248	0	0.24881	5.04328	4.24734	0.222499	0.692845	17.5775	9.29062		3.76	2100	Below LOD	1390	0.23	5	303	55.5	180	1.97	174	1630	131	13.2	8.4	15.2	112	246	29.7	117	24.9	2.46	28.1	4.38	30.9	6.3	19.4	3.11	18.2	2.81	34.5	8.8	2.35	31.7	22.8
Tuhua-K6_6	74.3285	0.284061	9.65677	5.91149	0.0966806	0	0.262538	5.27886	4.18108	0.204552	0.766173	17.7774	9.45993		3.48	1790	0.31	1170	0.108	Below LOD	237	47.4	150	2.2	160	1350	122	11.5	6.8	14.2	97	200	24.2	102	24.2	2.23	24.1	4.26	25.8	5.36	15.5	2.46	17.2	2.5	32.3	8.4	2.15	31.9	19.4
Tuhua-K6_7	74.3898	0.308087	9.76236	5.68734	0.123993	0.00901752	0.263793	5.33231	4.12329	0.212027	0.721334	18.0414	9.4556		2.66	1480	0.47	1010	0.179	2.96	255	40.1	124	1.93	126	1120	97	9.8	5.17	12.9	82	174	20.3	81	19.8	1.79	19.5	3.2	22.1	4.84	13.3	2.06	13.3	1.94	25.6	6.4	1.83	24.7	16.3
Tuhua-K6_8	73.4977	0.336587	10.1431	5.86232	0.109631	0	0.291725	5.50122	4.25764	0.220822	0.417474	17.2625	9.75887		2.28	1640	Below LOD	963	Below LOD	2.37	209	35.7	104	1.34	99	890	78.6	7.8	3.75	Below LOD	63.4	134	16	65.6	15.7	1.57	16.6	2.63	17.1	3.57	11.2	1.7	10.5	1.56	21	5.11	1.31	18.5	11.9
Tuhua-K6_10	74.4594	0.296204	9.74826	5.611	0.1231	0.0020436	0.294143	5.10519	4.36063	0.221581	1.23586	17.0754	9.46582		3.25	1840	1.18	1210	1.07	6.1	195	50.9	150	18	130	1230	113	11.1	7.7	Below LOD	87	191	22.4	84	18.9	2.01	21.4	3.36	23.7	4.8	14.2	2.24	13.2	1.87	29	6.7	2.32	30.7	16.9
Tuhua-K6_12	74.842	0.274871	9.54933	5.92612	0.0951379	0.00712807	0.281658	4.71837	4.30538	0.245356	0.895767	17.3833	9.02375		3.8	1900	Below LOD	1240	Below LOD	Below LOD	356	54.3	185	2.78	171	1570	131	12.7	7	17	108	236	28.6	113	26.3	2.45	28.2	4.52	30.2	6.5	18.8	3.09	18.3	2.65	39.4	8.4	2.74	33.2	21.7
Tuhua-K6_13	74.5717	0.285107	9.76818	5.69992	0.114604	0.0163314	0.258276	5.06918	4.21666	0.239522	1.1302	17.685	9.28584		2.52	1400	Below LOD	920	Below LOD	19.2	281	39.2	129	1.91	113	1010	89.9	10.7	4.92	12.3	72	157	18.3	74	18.5	1.75	18	2.89	20.8	4.17	12.2	2.01	12.7	1.69	20.4	6	1.36	28.4	14.2
Tuhua-K6_14	74.9189	0.319207	9.71447	5.75715	0.0962543	0.0113327	0.28813	5.17548	3.71908	0.251473	2.04521	20.1445	8.89456		3.44	1820	Below LOD	1140	0.142	5.5	169	46.2	154	2.53	146	1360	115	13.6	5.83	15.8	93	207	24.8	98	23.5	2.24	23.5	3.75	24.7	5.71	16.7	2.56	16.3	2.39	26.2	7.5	2.01	30	17.8
Tuhua-K6_15	74.2802	0.34349	9.76564	5.75565	0.119931	0	0.295663	5.19903	4.24039	0.21718	0.694862	17.5173	9.43942		4.2	2310	Below LOD	1540	Below LOD	Below LOD	330	60	191	3	179	1600	148	17.4	6.7	17.1	116	249	29.4	122	27.3	2.45	27	4.3	32	6.3	19.4	3.2	18.9	2.91	29.2	9.1	3	36.8	22.4
Tuhua-K6_16	74.3598	0.301343	9.75323	5.67881	0.099893	0	0.256897	5.28539	4.26465	0.218747	1.01038	17.4363	9.55004		3.26	1850	0.32	1210	0.15	4.63	151	49.6	157	2.22	150	1370	121	12.3	5.49	15.6	97	204	24.1	99	21	2.09	24.3	4.02	26.4	5.92	16.4	2.79	16.8	2.36	23.4	7.5	1.88	31.9	18.1
Tuhua-K6_19	74.4176	0.288812	9.7084	5.68939	0.122508	0	0.255225	5.16028	4.35775	0.213058	0.758221	17.0771	9.51803		3.14	1740	Below LOD	1190	Below LOD	Below LOD	248	44.3	149	2.04	139	1260	113	12.1	5.06	13	92	199	23.4	95	22.4	1.84	24	3.64	25.1	5.3	15	2.13	15.2	2.23	21.8	7.5	2.17	27.6	18.3
Tuhua-K6_21	74.6472	0.299778	9.5934	5.60292	0.116486	0	0.281719	5.11603	4.34248	0.233061	2.01812	17.19	9.4585		3.12	1790	0.36	1190	Below LOD	Below LOD	300	49.3	143	2.89	142	1300	111	12.8	5.06	16	95.4	211	23.5	94	21.4	1.99	21.6	3.78	25.4	5.33	15.6	2.49	14.7	2.45	21.7	7.39	1.84	29.8	18.5
Tuhua-K6_22	74.4944	0.276566	9.5191	6.091	0.143801	0.00102014	0.252906	4.93524	4.28593	0.208396	1.07477	17.3811	9.22117		3.31	1920	Below LOD	1230	0.22	Below LOD	179	49.3	163	3.4	154	1410	124	12.9	6.1	24	98	215	25.2	100	23	2.51	25	3.84	27.4	5.8	16.3	2.6	16.2	2.59	24.3	7.9	1.94	32	19.4
Tuhua-K6_23	74.2429	0.275497	9.78132	5.88057	0.15175	0.0161891	0.257062	5.23876	4.1559	0.233195	0.261064	17.8645	9.39466		3.05	1680	Below LOD	1120	0.142	4.43	225	45.8	142	2.33	149	1350	110	11.9	4.78	14.5	94	205	24.1	94	22	2.05	23.9	3.78	27.2	5.63	16.4	2.46	15.7	2.42	23.6	7.5	2.04	28.5	19
Tuhua-K6_24	74.5226	0.29913	9.62751	6.09781	0.0981506	0.033779	0.272641	5.07995	3.96844	0.21661	1.40978	18.7788	9.0484		3.2	1700	0.25	1220	0.25	3.7	245	50	155	2.16	142	1380	122	12.7	5.3	14.6	92	192	22.3	90.7	21.1	2.05	25.7	3.67	25.6	5.7	17.2	2.88	16.8	2.34	23.8	7.7	1.87	28.8	19.8
Average	74.4444	0.296757	9.6996	5.79892	0.116347	0.00673872	0.269397	5.17707	4.19071	0.225229	0.953308	17.7897	9.36778		3.26211	1823.68	0.481667	1196.47	0.2652	5.635	244.263	48.5421	153.842	3.13105	147.632	1340.53	116.447	12.0421	6.16105	15.6118	94.9368	203.158	24.1263	97.2263	22.5	2.11789	23.9842	3.84684	25.9316	5.42947	16.0053	2.51737	15.7421	2.34053	26.9316	7.62632	2.08421	29.7526	18.6579
Standard Deviation	0.30831	0.0201915	0.137424	0.148588	0.0188077	0.00934504	0.0154539	0.175994	0.155485	0.0145505	0.51522	0.732455	0.210552		0.556972	260.111	0.349824	177.3	0.286326	4.40663	71.0476	7.85899	24.692	3.6302	24.4908	217.906	18.9827	2.21994	1.37618	2.67228	15.1045	32.752	4.02228	15.9072	3.47994	0.279416	4.07107	0.641821	3.9199	0.816847	2.41695	0.4293	2.40631	0.397932	5.29046	1.18207	0.412584	5.32899	2.82161
Mamaku-K7_2	78.148	0.0906626	12.5536	0.879984	0.0320773	0.109181	0.779774	3.6783	3.7284	0.162934	2.02241	20.9602	7.40669		4.07	661	1	410	0.44	1.89	27.7	13.9	114.4	61.1	24.4	87.4	8.18	2.1	6.57	934	27.1	50.6	5.6	19.4	3.83	0.79	3.33	0.58	4.04	0.93	2.53	0.306	2.93	0.46	2.79	0.69	1.25	16.4	11.9
Mamaku-K7_3	78.1488	0.097642	12.5498	0.861909	0.0449018	0.107548	0.782663	3.71795	3.68869	0.145617	0.534818	21.1861	7.40664		4.64	733	1.22	420	0.39	2.17	36.6	14.3	124	62.1	24.4	91	9.4	2.07	6.73	950	25.7	48.7	6.04	24.3	4.6	0.64	3.34	0.67	3.61	1	2.61	0.314	3.05	0.38	3.07	0.84	1.6	19	11.9
Mamaku-K7_4	78.0885	0.0893954	12.5674	0.88236	0.070977	0.0959959	0.755734	3.76758	3.68206	0.157406	3.28332	21.2078	7.44965		4.1	620	1.5	350	0.4	2	19	14	110	50	22	86	7.4	1.6	5.7	790	21	44	4.2	18	3.2	0.6	1.8	0.45	4.7	0.79	2	0.45	1.8	0.25	3.3	0.74	1.1	12	10
Mamaku-K7_5	78.4592	0.106979	12.4809	0.787636	0.0288631	0.0714724	0.69611	3.7064	3.66241	0.146493	2.57349	21.4228	7.36881		4.11	920	1.66	470	0.62	8.4	29.6	16.9	142	61	22.4	85.1	9.1	2.31	10.4	960	25	49.4	5.65	20.2	2.57	0.68	3.3	0.61	3.5	0.62	2.08	0.27	2.65	0.345	2.98	0.81	1.48	23.1	10.6
Mamaku-K7_6	78.4634	0.124922	12.4143	0.837087	0.0388667	0.129627	0.819439	3.66707	3.50525	0.147942	4.24177	22.3846	7.17232		7.3	1100	1.5	620	Below LOD	7.2	31	23	170	90	31	130	13	6.3	10	1500	36	76	9	26	4.31	1.3	4.1	1.3	7	0.9	2.5	0.21	2.9	0.79	3.4	0.95	2.3	12.9	9.6
Mamaku-K7_7	78.3444	0.105897	12.5266	0.800847	0.0369743	0.115412	0.769581	3.67571	3.62457	0.182457	3.81448	21.6148	7.30029		4.05	800	1.02	401	0.34	3.44	16.7	13.2	101	66	25.5	103	8	1.87	5.29	787	23.3	47.8	5.62	22.6	4.15	0.82	3.3	0.58	3.54	0.85	2.79	0.309	2.78	0.52	3.46	0.74	1.45	16.5	9.2
Mamaku-K7_8	78.2582	0.107902	12.5771	0.921245	0.0502325	0.138931	0.828836	3.47634	3.64121	0.147684	1.21126	21.4924	7.11755		3.54	566	0.76	351	0.46	4.36	17.6	13.7	103	65.1	20.3	79	6.6	1.67	6.02	740	21	43.2	4.9	17.5	2.52	0.64	2.16	0.49	3.21	0.78	1.98	0.273	2.54	0.28	2.7	0.71	1.62	18.4	10.4
Mamaku-K7_9	78.464	0.112481	12.5236	0.900712	0.0559853	0.112155	0.790688	3.63302	3.40733	0.132447	1.02131	23.028	7.04035		5.28	910	1.3	483	0.44	Below LOD	28.7	16	152	73	30.4	113	9.2	2.1	7.35	1120	30	59.7	7	25.8	3.47	0.64	3.14	0.88	4.69	0.95	2.84	0.369	3.57	0.58	3.54	0.81	3	22	13.5
Mamaku-K7_10	77.9749	0.126444	12.6003	0.908327	0.024527	0.134673	0.754204	3.80047	3.67614	0.171391	1.16225	21.2111	7.47661		4.92	798	1.1	479	0.54	2.35	32.6	17	161	70	28.8	112	10.1	2.9	7.4	990	29.2	58.3	6.5	22.6	4	0.6	3.85	0.66	3.9	0.97	3.33	0.51	3.55	0.44	3.94	0.92	2.09	24.3	15.1
Mamaku-K7_11	77.8484	0.175107	13.1401	0.973481	0.0567724	0.128954	1.04265	3.54416	3.0904	0.157421	5.30713	25.1904	6.63456		3.87	622	0.87	364	0.53	3.12	17.7	13.1	110.3	53	23	89.9	7.74	1.66	6.28	819	23.2	48	5.54	19.7	3.28	0.61	2.74	0.487	4.01	0.74	2.5	0.292	2.76	0.394	2.69	0.83	1.52	17.4	10.99
Mamaku-K7_12	78.2915	0.106698	12.7641	0.842475	0.0149016	0.109096	0.756466	3.52915	3.5856	0.151328	0.0968427	21.835	7.11475		5.08	1001	0.98	560	0.332	1.53	28.6	16.3	92.1	94.1	35	156	9.15	2.04	4.32	815	27.3	57.6	6.87	26.2	5.01	1.14	4.57	0.85	5.41	1.29	3.67	0.405	3.75	0.488	4.85	0.719	1.13	19	9.69
Mamaku-K7_13	78.1615	0.110367	12.5807	0.959431	0.0402105	0.0889288	0.787455	3.65931	3.61208	0.148845	1.2714	21.6389	7.2714		3.86	642	0.77	422	0.52	2.49	20.9	14.3	113.5	58	24.6	91.9	8.09	2.11	6.65	886	24.9	50.4	5.68	20.3	4	0.6	3.24	0.6	4.25	0.85	2.57	0.333	3.34	0.41	3.29	0.82	1.95	19	12.4
Mamaku-K7_14	78.4856	0.119262	12.5866	0.886924	0.0598587	0.0867995	0.799201	3.46337	3.51235	0.177427	4.66276	22.3456	6.97572		3.93	661	1.27	380	0.52	1.94	23	12.2	116.6	55	22.2	86.9	7.83	1.72	6.67	856	22.8	47.9	5.58	20.2	3.63	0.63	4.4	0.5	3.24	0.724	2.8	0.49	2.7	0.51	2.97	0.85	1.64	13.2	11.2
Mamaku-K7_15	78.1352	0.102255	12.7369	0.878537	0.0421552	0.107073	0.808691	3.55656	3.63267	0.14846	3.86392	21.509	7.18922		5.09	810	1.02	499	0.47	1.68	24.6	17	148	63	28.9	109	8.5	2.75	8.3	1040	29	60.5	6.47	23.7	4.3	0.78	6.1	0.54	3.85	0.94	3.05	0.36	3.58	0.46	3.66	0.7	1.58	17.1	13.5
Mamaku-K7_16	78.3344	0.137126	12.4187	0.963505	0.0161006	0.125112	0.753124	3.64516	3.60678	0.15598	2.39908	21.7187	7.25194		4.23	750	1.04	389	0.59	1.51	32.9	13.1	133	63.2	26.7	98	8.5	1.92	7.1	1030	28.4	53.4	6.4	23.8	3.63	0.64	4.9	0.72	4.8	0.88	3.05	0.57	3.94	0.34	3.45	0.89	1.79	14.2	12
Mamaku-K7_17	78.5709	0.120001	12.4221	0.908398	0.0516331	0.0898551	0.793542	3.3356	3.70793	0.173117	2.28918	21.19	7.04353		3.9	754	1.13	449	0.57	1.79	39.2	15.7	129	66.9	26.2	97	9.37	1.97	6.99	1039	27.9	54.5	6.45	21.4	4.05	0.57	3.56	0.67	4	0.85	2.57	0.44	3.37	0.47	3.02	0.72	1.69	14.8	12.2
Mamaku-K7_18	78.2553	0.113955	12.7114	0.886929	0.0316591	0.119022	0.765809	3.55661	3.55931	0.144375	3.34068	21.9861	7.11591		3.92	675	0.77	410	0.49	1.15	28.1	13.6	119	57	22.3	92.8	7.96	1.62	6.59	879	24.7	51.8	5.8	19.2	3.48	0.83	3.8	0.55	4.09	0.67	2.76	0.5	2.67	0.48	3.77	0.74	1.83	12.4	11.8
Mamaku-K7_19	78.383	0.103759	12.5191	0.810032	0.0460308	0.102971	0.8098	3.66403	3.5613	0.159084	2.97434	22.0097	7.22533		4.01	753	1.5	406	0.61	2.25	36.3	14.6	127	61.7	24.2	89.5	9.21	1.81	6.35	976	25.3	52.2	6.08	21.5	4.06	0.64	4.8	0.64	4.34	0.73	2.5	0.57	2.82	0.376	2.94	0.75	2.01	13.4	11.8
Mamaku-K7_20	78.3334	0.117026	12.6036	0.854502	0.0500326	0.0915735	0.733812	3.49565	3.7203	0.131108	0.81663	21.0557	7.21596		4.16	680	1.25	431	0.56	1.81	31.5	15.3	129	62.8	25.7	101	8.2	2.36	7.2	940	26	56	6.22	20.3	3.87	0.71	3.97	0.54	3.9	0.86	2.47	0.52	2.55	0.423	3.52	1.02	1.45	15	13.4
Mamaku-K7_21	78.2369	0.137626	12.4491	0.797086	0.0414246	0.117266	0.769463	3.76584	3.68528	0.165209	0.172021	21.2295	7.45112		3.81	616	0.99	375	0.4	1.29	18.6	13	110	59.1	24.9	85	7.15	1.74	5.74	836	24.6	49.3	5.32	18.7	3.6	0.6	4.59	0.46	3.56	0.71	2.81	0.4	2.58	0.47	3.1	0.75	1.22	12.3	11.9
Mamaku-K7_22	78.3201	0.0963971	12.4901	0.909136	0.0582848	0.103171	0.815782	3.63175	3.57529	0.147957	0.74973	21.906	7.20704		4.03	700	0.89	435	0.37	Below LOD	28.5	14.8	130	69	29.2	101	8.8	2.6	6	1030	28.5	54.7	6.3	23.6	4.31	0.8	4.58	0.62	4.65	0.98	2.82	0.406	3.5	0.62	3.31	0.77	1.48	14.4	14.2
Mamaku-K7_23	78.5382	0.112105	12.4969	0.838642	0.0508013	0.119909	0.79325	3.51353	3.53664	0.171392	0.689295	22.207	7.05017		4.07	723	1.41	448	0.7	Below LOD	35.3	15.4	126	62.6	25.4	94	7.87	2.17	7.26	1000	27.2	56.5	5.81	22.7	3.83	0.71	4.47	0.54	3.96	0.76	2.87	0.41	3.6	0.42	3.08	0.93	1.57	15.3	12.9
Mamaku-K7_24	78.3537	0.1528	12.4998	0.882799	0.00166722	0.113921	0.795054	3.55361	3.64667	0.153442	0.784581	21.4863	7.20029		4.92	870	1.03	468	0.49	Below LOD	41.8	16.2	152	70.4	28.3	107	9.7	2.12	7.3	1130	30.6	61	7.42	25.2	4.73	0.8	5	0.69	3.96	0.86	2.87	0.439	3.3	0.51	3.45	0.95	1.79	16.8	13.2
Average	78.2869	0.115948	12.5745	0.877043	0.0410842	0.109506	0.791353	3.61031	3.59342	0.155631	2.14273	21.8181	7.20373		4.38652	755	1.12957	435.652	0.490091	2.75632	28.1087	15.0696	126.648	64.9609	25.9043	99.3696	8.65435	2.23957	6.8787	958.565	26.4652	53.5435	6.10652	21.8652	3.84478	0.72913	3.8713	0.635957	4.18304	0.853652	2.69435	0.397652	3.05348	0.45287	3.31652	0.810826	1.67565	16.4739	11.8861
Standard Deviation	0.179452	0.0199853	0.154928	0.0517966	0.0163753	0.0168075	0.0625969	0.113412	0.134904	0.0133349	1.54329	0.889571	0.190545		0.796827	132.956	0.258008	64.8688	0.0968464	1.94892	7.3243	2.23311	20.0241	10.2152	3.492	16.9959	1.28104	0.952158	1.3373	159.372	3.39245	6.99992	0.939001	2.63708	0.607647	0.17689	0.980057	0.182188	0.811527	0.141272	0.389881	0.100093	0.513647	0.113922	0.471743	0.0942833	0.4158	3.45559	1.54166
Rotoma-P_1	78.0887	0.112253	12.7089	0.967446	0.0132021	0.104708	0.807597	3.70713	3.4901	0.143444	0.234676	22.3743	7.19723
Rotoma-P_2	78.2811	0.090798	12.5754	0.943249	0.0270528	0.110375	0.720704	3.54486	3.70642	0.164258	2.16848	21.1204	7.25128
Rotoma-P_3	78.0539	0.12459	12.5455	1.00405	0.0320102	0.111166	0.73049	3.58089	3.81736	0.175211	0.766697	20.4471	7.39825
Rotoma-P_4	78.3807	0.104332	12.4244	0.811202	0.0339443	0.0899079	0.738909	3.39327	4.02338	0.173559	0.101641	19.4813	7.41665
Rotoma-P_5	78.2998	0.14674	12.5565	0.859602	0.0324904	0.0965695	0.65814	3.67667	3.67355	0.128854	0.722687	21.3144	7.35022
Rotoma-P_6	78.2771	0.100659	12.563	0.865977	0.0537519	0.119066	0.73392	3.5812	3.70538	0.140589	0.0139275	21.1253	7.28658
Rotoma-P_7	78.2285	0.101451	12.4459	0.983372	0.0486023	0.106546	0.726975	3.6258	3.73286	0.164267	0.400621	20.9567	7.35866
Rotoma-P_8	78.1916	0.126385	12.4309	0.77986	0.0453888	0.115893	0.726011	3.90092	3.68305	0.145047	1.60206	21.2301	7.58397
Rotoma-P_9	78.1969	0.110546	12.577	0.860395	0.0498032	0.0850767	0.750161	3.71499	3.65516	0.158093	0.359748	21.3935	7.37015
Rotoma-P_10	78.1738	0.0940318	12.6654	0.894963	0	0.0902631	0.728321	3.63789	3.71529	0.164682	0.494728	21.0411	7.35318
Rotoma-P_11	77.8712	0.098841	12.6051	0.873085	0.0410842	0.116302	0.750814	3.77637	3.8672	0.145996	0.655141	20.1363	7.64357
Rotoma-P_12	78.3777	0.11218	12.4164	0.783585	0.0313344	0.12275	0.724609	3.59931	3.83211	0.147566	0.300465	20.4529	7.43142
Rotoma-P_13	78.2651	0.091515	12.4619	0.742568	0.0265582	0.099243	0.690928	3.68508	3.93712	0.144281	0.346521	19.8788	7.62219
Rotoma-P_14	78.4005	0.113405	12.6115	0.933038	0.0508496	0.102732	0.75024	3.66371	3.37402	0.121474	0.783618	23.2365	7.03773
Rotoma-P_15	78.0682	0.12394	12.5711	0.915776	0.0362679	0.107616	0.689296	3.63333	3.8545	0.154884	0.339364	20.2538	7.48783
Rotoma-P_16	78.5166	0.0998748	12.4347	0.776066	0.0416759	0.101705	0.71976	3.60839	3.70119	0.1359	2.75848	21.2138	7.30959
Rotoma-P_17	77.9128	0.103961	12.5638	0.993159	0.00917889	0.109963	0.739527	3.77228	3.79534	0.170662	0.88406	20.5285	7.56762
Rotoma-P_18	78.0431	0.105569	12.6808	0.839991	0.0695785	0.10208	0.693714	3.69564	3.76946	0.143997	0.150595	20.7041	7.4651
Rotoma-P_19	78.371	0.133875	12.4374	0.871128	0.0200327	0.133421	0.733491	3.59681	3.70281	0.165379	0.914112	21.1653	7.29962
Rotoma-P_21	78.0985	0.120611	12.5475	0.917601	0.040861	0.0925932	0.728618	3.68203	3.77172	0.162023	0.818974	20.7064	7.45375
Rotoma-P_22	78.3856	0.111584	12.4498	0.952315	0.0472495	0.108226	0.733611	3.49632	3.71528	0.152583	0.225698	21.0982	7.21159
Rotoma-P_23	78.0659	0.110281	12.6179	0.938589	0.0786663	0.0980081	0.728698	3.77546	3.58645	0.164065	0.120554	21.7669	7.36191
Rotoma-P_24	78.1368	0.120483	12.366	0.990468	0.0466486	0.120955	0.67578	3.76311	3.77977	0.169304	0.713482	20.6724	7.54289
Rotoma-P_25	77.982	0.128443	12.6117	0.833362	0.00913539	0.102348	0.765089	3.68037	3.88759	0.154991	0.412067	20.0592	7.56796
Average	78.1945	0.111931	12.5362	0.888785	0.0368903	0.106146	0.726892	3.65799	3.74071	0.153796	0.678683	20.9316	7.39871
Standard Deviation	0.167076	0.0140403	0.0943807	0.0763052	0.0186022	0.0115756	0.0304578	0.104832	0.137132	0.014254	0.657978	0.798084	0.148198
Rotoma-K8_1	78.0753	0.144568	12.7091	0.811763	0.0678536	0.130249	0.816105	3.75503	3.49006	0.159719	0.0502396	22.3707	7.24509		4.24	802	1.41	485	0.53	2.23	29.7	13.6	115	75.4	27.7	95	9.54	1.45	5.69	1020	26.7	54.9	6.32	25	4.9	0.84	3.89	0.64	4.06	1.01	2.99	0.404	3.47	0.53	3.47	0.79	1.55	16.9	12.1
Rotoma-K8_2	78.3797	0.0948377	12.6303	0.833623	0.061259	0.140404	0.751251	3.75302	3.35564	0.161901	0.0914074	23.3576	7.10866		4.01	747	1.26	425	0.49	0.85	37.2	12.6	110	67.6	25.8	91	8.7	1.55	5.76	920	25.1	53.2	6.31	26.3	4.21	0.89	4.26	0.75	3.98	0.86	2.78	0.424	2.92	0.42	3.7	0.73	1.73	15.1	10.26
Rotoma-K8_3	78.0086	0.108446	12.6857	0.965878	0.0424413	0.143174	0.835304	3.73971	3.47072	0.123395	0.61467	22.4762	7.21043		3.92	766	1.32	475	0.49	1.91	43.7	14.2	110	74.1	27.8	90	8.9	1.97	5.69	1000	27.2	53.9	5.9	25.1	5.5	0.69	4.17	0.67	4.11	1.05	2.94	0.48	3.21	0.51	3.06	0.69	1.34	16.9	11.3
Rotoma-K8_4	78.2496	0.109742	12.639	0.820054	0.0568575	0.124677	0.810631	3.87208	3.31735	0.144304	0.369711	23.588	7.18943		3.97	750	1.04	426	0.33	Below LOD	36.1	12.6	109	68	24.4	90.7	8.43	1.87	5.09	875	23.9	50.9	5.92	22.7	4.06	0.73	4.53	0.69	3.54	0.91	2.77	0.411	3.2	0.496	2.98	0.82	1.52	14.3	10.9
Rotoma-K8_5	78.3407	0.131763	12.5379	0.881766	0.0306705	0.121374	0.831005	3.76962	3.35513	0.15576	0.224952	23.3496	7.12475		3.93	725	0.88	473	0.5	0.87	41.2	14.5	105	71.1	26.8	91	8.5	1.83	5.2	930	27.4	53.1	5.77	21.8	4.11	0.54	5	0.62	3.93	0.93	2.75	0.43	3.18	0.47	2.74	0.74	1.44	17.7	12.4
Rotoma-K8_6	78.1126	0.138525	12.6788	0.904963	0.0688607	0.152041	0.984749	3.76405	3.19537	0.134129	0.890179	24.4455	6.95943		3.64	758	1.59	428	0.58	1.25	26.3	12.7	100.1	83	23.2	108	7.49	1.74	5.01	812	22.9	46.5	4.89	17.2	3.79	0.79	4.51	0.55	3.56	0.76	2.04	0.359	2.73	0.357	3.38	0.58	1.02	16	10.99
Rotoma-K8_7	77.9792	0.114262	12.6428	0.939135	0.0490377	0.1075	0.950625	3.86539	3.35206	0.166801	0.49091	23.2631	7.21745		5.13	960	1.69	547	0.51	1.25	51.6	17.1	139	82	31.3	114	11.3	1.94	6.9	1130	30.4	64.1	7.63	28.1	5.3	1.1	6.3	0.86	4.84	1.03	3.47	0.59	3.78	0.6	4.23	0.86	1.72	20.3	13.3
Rotoma-K8_8	78.3193	0.104791	12.6116	0.856045	0.0515559	0.14002	0.868966	3.68594	3.36169	0.171133	0.53859	23.2976	7.04763		4.09	801	1.08	449	0.52	1.03	37.6	13.8	113.2	65.7	25.8	90.5	8.63	2.05	5.55	887	24.6	52.8	6.58	23.1	4.38	0.86	7.3	0.67	3.61	0.85	2.89	0.4	2.97	0.37	3.26	0.82	1.49	17.2	11.1
Rotoma-K8_9	78.3978	0.135929	12.5033	0.841421	0.0316402	0.13614	0.833677	3.78915	3.33093	0.128784	0.668816	23.5363	7.12008		4.02	772	1.3	490	0.49	1.19	18.9	14.6	118	66.7	29.6	110.2	8.31	1.61	6.72	908	28	58.5	6.53	23.4	4.28	0.96	6.4	0.68	4.93	1.05	2.97	0.56	3.77	0.57	3.43	0.77	1.49	19	13.4
Rotoma-K8_10	77.8033	0.137643	12.4734	0.886499	0.0402542	0.120288	0.779412	3.44471	4.31451	0.152266	0.675892	18.0329	7.75922		4.49	893	1.27	521	0.65	1.28	37.8	14.9	154	71.6	31.1	110.3	10.21	2.05	6.44	1105	29.9	63.6	7.42	27	5.7	0.84	7.6	0.8	4.95	1.1	3.53	0.55	3.58	0.6	3.99	0.77	1.83	21.9	12.5
Rotoma-K8_11	78.2556	0.123647	12.5495	0.763429	0.0373602	0.0840815	0.654842	3.66226	3.86933	0.150697	0.380573	20.2246	7.53159		3.08	598	1.15	401	0.19	Below LOD	35.4	11.7	98	62	22.8	76.4	7.4	1.68	4.6	830	22.7	44.5	4.86	20.8	4.2	0.61	2.56	0.53	4.17	0.73	2.46	0.36	2.61	0.36	2.42	0.73	1.05	13.7	9.4
Rotoma-K8_12	78.4349	0.117023	12.5277	0.875179	0.0683764	0.12006	0.838028	3.60842	3.41029	0.164147	0.81436	22.9995	7.0187		4	785	1.59	473	0.32	0.62	43.7	14.4	116	74.2	27.5	94.6	9.38	1.69	5.59	981	27	53.4	6.34	24	4.8	1.03	3.76	0.67	3.95	0.97	2.62	0.424	3.46	0.55	3.18	0.85	1.72	15.2	11.5
Rotoma-K8_13	78.041	0.126241	12.5471	1.00298	0.067558	0.12365	0.863012	3.81919	3.40924	0.149545	0.387219	22.8911	7.22843		4.86	897	1.55	508	0.44	Below LOD	45.9	15.3	133	80.4	30.1	108	10	2.4	6.2	1040	28.1	59.2	7.19	27	4.42	0.86	3.37	0.76	4.8	0.97	3.77	0.44	3.9	0.49	4.1	0.92	1.7	16.4	13
Rotoma-K8_15	78.3046	0.102776	12.4521	0.919965	0.0333216	0.113635	0.823427	3.85698	3.39325	0.158361	3.19893	23.0766	7.25023		3.88	728	1.61	450	0.51	1.09	40.1	14.2	108	63.6	26	87.2	8.1	1.74	5.21	870	24.4	51.7	5.83	23.8	4.4	0.81	2.62	0.62	3.46	0.96	2.5	0.34	3.32	0.4	2.97	0.67	1.31	14.6	9.9
Rotoma-K8_16	78.1743	0.113001	12.6146	0.863682	0.0328791	0.129382	0.810676	3.90573	3.35575	0.1492	0.619222	23.2957	7.26148		4.49	800	1.33	503	0.43	1.28	38.9	15.2	120	75	29.3	105	9.4	2.17	6.2	990	28.6	61	6.7	24.2	4.5	0.69	3.42	0.65	4.6	0.85	2.63	0.43	3.61	0.46	3.6	0.74	1.66	15.9	12.5
Rotoma-K8_17	78.1506	0.135398	12.7468	0.865326	0.0661008	0.123535	0.829398	3.83559	3.2473	0.14225	1.15354	24.0663	7.08289		3.85	687	0.69	422	0.32	1.25	37.7	14.6	109	64.1	24.5	91	7.94	1.39	5.22	840	23.7	52.4	5.89	22.2	4.5	0.81	2.29	0.52	3.73	0.71	2.47	0.366	2.69	0.43	2.41	0.67	0.96	14.1	10
Rotoma-K8_18	78.0652	0.111214	12.6297	0.830061	0.0517742	0.145708	0.893523	3.86658	3.40616	0.123823	0.958053	22.9188	7.27275		3.89	789	1.33	463	0.41	0.92	42.8	13.4	115	78.9	25.9	103	8.18	1.73	6.22	916	24.9	56	6.2	22.7	4.35	0.93	2.96	0.61	4.35	0.93	2.9	0.376	3.22	0.49	2.88	0.64	1.42	14.8	11.3
Rotoma-K8_19	78.3793	0.136942	12.4889	0.86815	0.0387456	0.143842	0.828497	3.80379	3.31181	0.150689	0.326606	23.6666	7.1156		4.35	814	1.36	457	0.38	1.54	32.7	13.8	117	71.6	27.1	97	9.3	1.58	5.9	970	26.6	57.7	6.61	26.6	4.89	0.75	2.67	0.73	4.9	0.98	3.75	0.372	2.85	0.53	3.82	0.94	1.67	14.3	11.6
Rotoma-K8_20	78.0068	0.135135	12.6574	0.84433	0.0571161	0.126254	0.820526	3.83812	3.51425	0.16189	0.0847834	22.1973	7.35237		3.92	751	1.1	431	0.45	0.84	37.7	13.3	109	64.5	26.5	95	8.7	1.7	5.22	860	24.4	52.3	5.92	22.4	3.95	0.93	2.8	0.53	4.16	0.84	2.62	0.346	3.34	0.51	3.45	0.91	1.45	13.1	11.1
Rotoma-K8_21	78.1293	0.118046	12.563	0.873883	0.0555158	0.124189	0.847457	3.49722	3.79132	0.169883	1.67396	20.6074	7.28854		3.74	703	0.87	458	0.36	1.82	42	14.1	106	72.3	28	91	8.48	1.97	5.16	913	25.8	54.1	5.65	22.9	4.6	0.81	2.52	0.67	3.85	0.94	3.17	0.34	3.08	0.45	3.14	0.82	1.41	14.2	11.2
Rotoma-K8_22	78.4513	0.120564	12.5133	0.874877	0.0466799	0.108831	0.909634	3.66626	3.30851	0.144911	0.780097	23.7119	6.97478
Rotoma-K8_23	78.4615	0.0986459	12.5454	0.917707	0.0323166	0.105844	0.91847	3.53949	3.38059	0.145669	2.74776	23.2094	6.92007
Rotoma-K8_24	78.3509	0.135548	12.5158	0.867274	0.0795763	0.14718	0.878481	3.56003	3.4652	0.159539	1.26281	22.6108	7.02523
Average	78.2118	0.121508	12.5854	0.87426	0.0507718	0.126611	0.842508	3.73471	3.45245	0.150817	0.826229	22.7475	7.18717		4.075	776.3	1.271	464.25	0.445	1.24824	37.85	14.03	115.215	71.59	27.06	96.945	8.8445	1.8055	5.6785	939.85	26.115	54.69	6.223	23.815	4.542	0.8235	4.1465	0.661	4.174	0.9215	2.901	0.4201	3.2445	0.47965	3.3105	0.773	1.474	16.08	11.4875
Standard Deviation	0.180301	0.0145741	0.0808572	0.0520552	0.0146882	0.0161182	0.0670791	0.1303	0.241224	0.0136843	0.786102	1.40573	0.188261		0.440341	78.8657	0.270903	37.4051	0.105905	0.422984	7.1689	1.18637	13.3008	6.32122	2.40337	9.70938	0.94732	0.250336	0.614228	88.2737	2.22504	4.97128	0.714483	2.52717	0.507051	0.13484	1.62698	0.0906061	0.50379	0.108301	0.450168	0.0736713	0.376752	0.0741913	0.509948	0.0966872	0.245965	2.28809	1.12728
Opepe-K9_3	75.6608	0.216759	13.5319	1.86254	0.0494728	0.181315	1.81437	3.81719	2.86564	0.162162	2.58733	26.4028	6.68282
Opepe-K9_5	76.2006	0.191061	13.282	1.87541	0.0475268	0.189642	1.61658	3.75512	2.84202	0.130966	3.66883	26.8121	6.59714
Opepe-K9_9	76.0289	0.208514	13.3866	1.83212	0.0599968	0.14641	1.60141	3.95148	2.78452	0.159482	3.60932	27.3042	6.736
Opepe-K9_15	76.1729	0.205708	13.3228	1.765	0.0765678	0.17699	1.62495	3.67838	2.97675	0.179668	5.58804	25.5893	6.65513
Opepe-K9_17	76.0305	0.218426	13.2397	1.88487	0.048607	0.168379	1.62397	3.90708	2.87842	0.171086	3.33089	26.414	6.78549		7.97	1411	2.81	483	1.6	Below LOD	58.9	16.3	115.1	125.6	30.9	239	9.29	1.63	7.34	657	24.7	57	6.77	25.7	4.37	1.11	7.2	0.752	5.15	1.03	3.44	0.64	3.12	0.538	6.1	0.73	1.52	18	10.51
Opepe-K9_18	76.5622	0.200224	13.4278	1.86786	0.12484	0.162776	1.61299	3.42087	2.62047	0.175537	6.38585	29.2169	6.04134		8.02	1276	2.43	464	1.49	3	42.6	17.19	120.7	120.2	33.4	232.5	8.44	1.91	7.71	636	24.5	55.7	6.43	25.1	4.82	1.12	6.15	0.86	5.08	1.2	4.01	0.586	3.45	0.526	6.35	0.63	1.43	18.16	11.6
Opepe-K9_19	75.9799	0.199653	13.4952	1.89643	0.0688851	0.185173	1.63324	3.6892	2.85234	0.178478	5.55246	26.6377	6.54154		7.56	1075	2.2	454	1.44	2.22	56.8	19.1	146.9	117.9	38	202	8.94	2.28	9.24	810	32.1	69.8	7.66	29.6	6.15	1.05	6.92	1	5.56	1.29	3.97	0.54	3.58	0.65	5.92	0.86	1.96	21.7	15.6
Opepe-K9_20	75.4525	0.23697	13.6528	1.86106	0.0566085	0.193455	1.78285	3.87505	2.88866	0.157186	4.22492	26.1202	6.76371		8.21	1478	3.51	556	1.7	3.46	28.7	18.6	117.5	149.3	35.6	260	8.94	1.64	7.43	698	26.4	54.2	6.58	28.4	5.74	1.12	6.84	0.99	5.19	1.2	3.58	0.54	3.77	0.56	6.25	0.68	1.71	17.8	11.27
Opepe-K9_21	75.5011	0.234697	13.7416	1.87221	0.0485902	0.239947	1.77988	3.75811	2.8239	0.158968	3.29737	26.7364	6.58202		7.77	1420	7.5	596	2.1	10.1	60	20.8	117.5	142.4	34.1	253	8.23	2.09	9.5	645	27.2	55	5.8	23.5	5.8	1.03	4.84	0.85	5.3	1.22	3.25	0.435	3.35	0.581	6.3	0.69	1.55	19.8	11.31
Opepe-K9_22	76.2329	0.214739	13.3285	1.76331	0.0672449	0.144075	1.60521	3.71041	2.93357	0.173133	3.24876	25.9864	6.64398		8	1400	2.69	562	1.71	Below LOD	37.5	18.9	133	122	28.8	207	9.7	1.66	8.6	708	26.7	55.6	5.77	27	4.8	0.9	5.48	0.9	4.64	1.03	2.86	0.4	3.59	0.57	4.8	0.75	1.67	19.9	10.05
Opepe-K9_23	75.5668	0.214774	13.4892	1.86332	0.0825497	0.195672	1.74402	3.91772	2.92591	0.162626	2.21302	25.8268	6.84363
Opepe-K9_24	76.1142	0.210444	13.6598	1.79317	0.130341	0.188257	1.79408	3.56313	2.54659	0.185099	6.63975	29.8887	6.10971		8.62	1402	4.3	484	1.84	11.5	24	16.9	111	119	30.2	232	7.98	1.77	6.16	588	21.2	50.8	6.17	22.2	4.8	0.98	4	0.8	5.31	0.8	4	0.32	2.2	0.36	5.2	0.57	0.89	15.5	7.9
Opepe-K9_25	75.6573	0.242566	13.5102	1.88298	0.095488	0.21308	1.78943	3.72697	2.882	0.179105	4.10705	26.2517	6.60897		8.03	1452	6.6	632	1.74	6.5	41.4	21.1	120	143.7	32.8	247	9.05	2.53	9.09	651	26	53.3	5.89	22.9	4.72	1.09	4.82	0.69	5.4	0.94	3.42	0.421	3.13	0.451	6.19	0.58	1.63	20.7	10.79
Average	75.9354	0.214964	13.4668	1.84771	0.0735937	0.183475	1.69408	3.75159	2.83237	0.167192	4.18874	26.8606	6.58396		8.0225	1364.25	4.005	528.875	1.7025	6.13	43.7375	18.6112	122.713	130.012	32.975	234.062	8.82125	1.93875	8.13375	674.125	26.1	56.425	6.38375	25.55	5.15	1.05	5.78125	0.85525	5.20375	1.08875	3.56625	0.48525	3.27375	0.5295	5.88875	0.68625	1.545	18.945	11.1288
Standard Deviation	0.337926	0.0153341	0.155011	0.0452718	0.0280795	0.0258311	0.0883937	0.149382	0.121834	0.0142927	1.41858	1.28333	0.242188		0.310104	130.98	2.00631	66.4475	0.208035	3.92297	13.7652	1.7565	11.6604	12.8772	3.00131	20.6682	0.570099	0.333913	1.16022	66.2537	3.07525	5.71733	0.635339	2.65384	0.645623	0.0781939	1.17352	0.108354	0.273127	0.166856	0.411337	0.107784	0.48905	0.0884146	0.574268	0.0957583	0.308267	1.96401	2.14985
Poronui-K10_1	76.7486	0.194391	12.9692	1.53431	0.0663257	0.159453	1.45141	3.75554	3.12077	0.107176	0.0913697	24.5929	6.87631		7.3	1113	2.74	397	1.38	1.75	47.5	15.3	118.2	105	30.2	215	7.91	1.85	7.8	656	25.5	56.4	6.47	24.6	4.47	0.93	6.23	0.72	5.05	1.08	3.22	0.61	3.64	0.552	5.85	0.74	2.04	19.9	12.39
Poronui-K10_2	76.6263	0.185594	13.0723	1.62551	0.0652058	0.132764	1.3575	3.81293	3.1219	0.126443	0.223226	24.5448	6.93483		6.76	1090	2.19	368	1.53	4	42	13.95	111.3	95.2	28.5	205	7.45	1.81	6.64	615	23.3	49.6	6	22.7	5.11	0.91	7	0.77	4.4	1.06	3.18	0.55	3.52	0.46	5.8	0.66	1.88	17.7	10.23
Poronui-K10_3	76.4764	0.19674	13.3027	1.72039	0.0219689	0.153486	1.59882	3.65723	2.87217	0.175057	1.28438	26.6267	6.5294
Poronui-K10_4	76.6289	0.207384	13.351	1.44311	0.0789441	0.141826	1.55542	3.85266	2.74072	0.12104	0.727047	27.9594	6.59338		7.6	1284	2.65	459	1.61	Below LOD	51.8	17.25	125.5	116	33.3	Below LOD	9.15	1.79	7.34	753	29.5	59.2	6.73	28.2	5.4	0.9	7.58	0.85	5.41	1.23	3.36	0.63	4.52	0.53	6.22	0.8	1.9	25.1	13.2
Poronui-K10_5	76.1528	0.197868	13.2228	1.83584	0.09275	0.165752	1.50183	3.77996	3.05036	0.142827	1.27628	24.9652	6.83033		8.27	1339	2.95	460	1.73	Below LOD	47.8	16.7	133	121.9	32.9	220	9.7	1.74	7.88	776	28.9	59.1	6.87	27.7	5.5	0.93	8.1	0.98	5.7	1.24	3.97	0.67	4.01	0.49	6.31	0.76	2.02	22.5	12.3
Poronui-K10_8	75.3895	0.241113	13.609	1.95131	0.100985	0.208206	1.72061	3.89349	2.88574	0.14493	0.217228	26.1248	6.77923		6.2	1200	4.3	450	1.36	7.8	19.1	17.3	96	106	22.6	212	6.1	Below LOD	6.3	530	21	44	4.6	16.5	3.5	0.81	5.4	0.74	4.5	0.99	2.06	0.3	3.3	0.46	4.9	0.66	2.2	16	7.7
Poronui-K10_9	76.898	0.200358	12.9599	1.55522	0.0534464	0.121332	1.409	3.70241	3.10032	0.140021	0.812702	24.8032	6.80273		7.68	1100	1.93	395	1.3	3.9	47.5	15.1	121	104	30.2	197	8.5	1.78	7.09	683	24.8	53.8	6.42	26.3	4.75	0.95	8	0.92	5.3	1.22	3.06	0.63	3.47	0.6	5.67	0.64	1.93	21.4	11.22
Poronui-K10_11	76.6493	0.15204	13.0833	1.68029	0.0423733	0.147901	1.48775	3.65896	3.09805	0.155537	0.483	24.7411	6.75701		8.05	1280	2.17	455	1.28	3.16	44.4	17.2	137	119.4	34.7	236	10.1	2.15	8.06	775	29.1	59.5	7.13	30.2	5.93	0.92	9.4	0.86	5.7	1.37	3.47	0.74	4.45	0.67	5.82	0.81	1.9	23.4	12.55
Poronui-K10_12	76.4216	0.481496	13.4176	1.30514	0.0472714	0.160016	1.85526	3.69649	2.61508	0.139019	3.14832	29.2234	6.31157		10.25	1480	2.34	536	1.49	4.7	33.3	20.4	155	139	40.2	263	11.07	2.24	9.1	930	33.8	69.9	8.33	33	6.2	1.17	9	0.98	6.96	1.5	4.58	0.8	5.29	0.66	6.75	0.96	2.29	26.9	15.4
Poronui-K10_13	76.5409	0.139787	13.1389	1.67331	0.0315288	0.154242	1.47855	3.74972	3.0931	0.16006	0.645496	24.7457	6.84282		6.74	991	2.35	410	1.48	8	30.1	16.3	110.1	104.2	31	192	7.97	1.64	6.29	632	25.5	52.2	5.52	21.7	5.13	0.8	6.3	0.82	5.02	1.15	3.03	0.53	2.96	0.6	5.54	0.53	1.47	21.4	11.73
Poronui-K10_14	75.1703	0.300837	13.5969	2.28326	0.09044	0.268204	1.79752	3.577	2.91555	0.155802	5.41551	25.7825	6.49255		8.15	1822	5.83	563	1.95	2.35	59.7	17.29	109	130.2	32.3	249	9.65	1.84	6.28	688	26.4	52.8	5.87	24.6	5.33	1.09	4.11	0.94	5.49	1.13	3.62	0.418	3.55	0.57	7.26	0.691	1.41	19.3	11.16
Poronui-K10_16	76.754	0.194151	12.9858	1.49859	0.083592	0.145388	1.41373	3.84061	3.08411	0.135387	0.549676	24.8869	6.92472		12.29	1867	2.87	741	2.64	3.38	89.7	25.3	193.7	174	52.4	323	14.35	2.34	10.71	1191	45.7	92.1	10.29	44	9.3	1.53	7.5	1.49	9.2	1.91	5.8	0.74	5.3	0.95	8.8	1.16	2.36	29.8	19.9
Poronui-K10_17	76.852	0.151467	13.0436	1.40757	0.0656195	0.114395	1.44666	3.72982	3.18888	0.137939	0.852347	24.1	6.91871		7.59	1192	2.04	416	1.38	4.58	43.3	15.9	128.4	117.7	33.3	225	9.78	1.37	7.35	765	28.7	57	6.6	27.1	5.78	0.93	4.61	0.91	6.38	1.31	3.42	0.456	4.07	0.449	5.85	0.77	1.46	19	12.5
Poronui-K10_18	76.1254	0.199389	13.2595	1.79805	0.0350557	0.149412	1.58879	3.85886	2.98548	0.113816	0.330785	25.4986	6.84434		8.38	1337	2.91	456	1.68	Below LOD	47.3	17.7	129.5	115.7	32.8	246	8.95	1.91	7.8	719	27.4	57.1	6.99	26	5.24	0.92	6.09	0.83	5.22	1.29	3.69	0.515	3.78	0.5	6.22	0.61	1.8	20.2	12.49
Poronui-K10_19	76.3932	0.187226	13.0342	1.57056	0.0898983	0.167786	1.5681	3.89301	3.09608	0.140633	3.5054	24.6742	6.98909		7.06	1223	2.76	419	1.71	2.51	51.7	15.7	110	118.7	29.7	226	8.39	1.6	6.38	686	26.3	51.7	5.64	24.6	4.84	0.9	7.75	0.83	4.95	1.09	3.18	0.459	3.4	0.51	5.91	0.68	1.12	17.6	11
Poronui-K10_23	76.3414	0.196739	13.2037	1.54991	0.0732295	0.156117	1.50088	3.88714	3.09093	0.143912	1.28411	24.6985	6.97807
Poronui-K10_24	76.8177	0.189935	13.0092	1.57162	0.0540439	0.15623	1.38833	3.75103	3.06193	0.140506	1.90924	25.088	6.81296
Poronui-K10_25	77.0305	0.183628	12.907	1.55978	0.123551	0.112103	1.3932	3.4843	3.20592	0.141663	3.45902	24.0276	6.69022
Average	76.4454	0.211119	13.1759	1.64243	0.0675683	0.156367	1.52852	3.75451	3.01817	0.140098	1.4564	25.3935	6.77268		8.02286	1308.43	2.85929	466.071	1.60857	4.19364	46.8	17.2421	126.979	119.071	33.15	231.462	9.21929	1.85077	7.50143	742.786	28.2786	58.1714	6.67571	26.9429	5.46286	0.977857	6.93357	0.902857	5.66286	1.255	3.54571	0.574857	3.94714	0.5715	6.20714	0.747929	1.84143	21.4429	12.4121
Standard Deviation	0.491057	0.0759415	0.211979	0.223693	0.026789	0.0354854	0.141388	0.113222	0.155866	0.0162809	1.47464	1.35252	0.184058		1.56576	258.854	1.03651	95.1707	0.352657	2.04839	15.9989	2.76904	24.177	19.5253	6.73952	34.4132	1.93498	0.265376	1.24359	159.437	5.88508	11.4282	1.36104	6.28021	1.28986	0.185065	1.5589	0.187716	1.22087	0.232271	0.854704	0.140196	0.713404	0.130069	0.929776	0.157754	0.35927	3.83139	2.7467
Karapiti-Unit B-K11_1	76.516	0.197679	13.1295	1.63542	0.0548656	0.1323	1.51742	3.7351	3.0817	0.129816	1.18233	24.8291	6.8168		7.2	1156	2.45	416	1.51	2.64	50.9	16.7	114.5	115.6	32.7	213.9	8.76	1.88	7.35	721	26.7	54.6	6.02	26.1	5.49	1.03	5.87	0.871	5.52	1.11	4.69	0.53	3.91	0.484	5.91	0.74	1.6	20.8	12.3
Karapiti-Unit B-K11_2	76.657	0.184259	13.1455	1.65013	0.0821271	0.153804	1.56495	3.65545	2.90672	0.13906	3.17678	26.3723	6.56218		7.54	1193	3.63	425	2.09	6.5	46.8	18.3	115.6	106.7	29.7	220	8.71	1.33	9.5	665	25.3	58	6.42	25.2	5.33	0.95	4.54	0.81	4.53	1.16	4.68	0.5	3.23	0.5	5.86	0.77	1.71	22.1	12.36
Karapiti-Unit B-K11_3	76.4654	0.186303	13.1136	1.63687	0.041258	0.169806	1.60835	3.60285	3.17557	0.157321	3.63325	24.0793	6.77842		8.97	1450	3.4	458	2.23	5.8	58.4	19.8	138	128	35.3	257	10.2	1.8	11.1	801	29.8	64.6	6.92	29	5.57	1.06	5.57	0.9	6.03	1.29	6.4	0.57	3.84	0.61	7.64	0.98	2.23	22.9	14.4
Karapiti-Unit B-K11_4	77.0391	0.176495	13.1272	0.947612	0.0139031	0.0517713	0.893989	2.92979	4.82015	0.174612	4.67567	15.9827	7.74994		3.57	524	1.02	174	0.7	0.97	19.8	9	63	75.5	15	105	3.98	0.85	3.55	304	12.7	28	2.92	11.3	2.54	0.64	2.28	0.351	2.18	0.52	2.46	0.224	1.61	0.261	2.9	0.35	0.86	8.9	6
Karapiti-Unit B-K11_5	76.8618	0.190733	12.9449	1.54226	0.0738954	0.139285	1.39884	3.67633	3.17197	0.12152	0.54329	24.2316	6.8483		7.11	1099	2.45	400	1.35	1.02	39.6	15.8	98.8	107.9	31.6	200	7.96	1.83	7.29	683	25.7	53.2	5.82	24.5	4.83	0.89	5.5	0.85	5.2	1.03	5.52	0.515	3.65	0.57	5.8	0.61	1.54	19.5	11.85
Karapiti-Unit B-K11_6	76.5075	0.18903	13.1091	1.53376	0.0603889	0.134529	1.45575	3.90531	3.10462	0.123283	0.244907	24.6431	7.00993		7.16	1115	2.02	382	1.36	Below LOD	38.5	15.3	104.8	104.1	30.3	209	8.37	1.39	7.51	677	25.1	54.7	6.22	26.3	4.72	0.97	6.1	0.73	5.38	1.01	5.54	0.58	3.64	0.549	5.71	0.623	1.59	18.7	11.37
Karapiti-Unit B-K11_7	76.5273	0.194735	13.0889	1.59932	0.0902382	0.151024	1.45184	3.65138	3.24531	0.128511	1.47173	23.5809	6.89669		6.59	1202	4.03	352	1.57	Below LOD	38.6	15.5	111.3	110.9	29.6	192	8.47	2.06	8.17	746	26.8	54.5	6.06	26.4	4.99	1	5.01	0.822	5.41	1.1	4.48	0.576	3.25	0.489	5.7	0.619	1.5	21.1	12.81
Karapiti-Unit B-K11_8	76.3384	0.155874	13.1361	1.72482	0.0538096	0.161704	1.56363	3.74737	3.11836	0.138821	1.48218	24.4803	6.86572		6.69	1080	2.14	412	1.65	1.6	52.6	15.6	97	112.9	31.3	216	8.08	1.94	7.52	680	27.1	57.7	5.81	25.2	5.15	1.08	5.7	0.78	5.58	1.22	4.27	0.55	3.58	0.548	5.43	0.56	1.52	19.5	12.6
Karapiti-Unit B-K11_9	76.4797	0.17534	13.0729	1.71384	0.059918	0.1529	1.51334	3.72717	3.1049	0.167858	1.47177	24.6319	6.83207		7.45	1264	2.12	439	1.39	1.83	39.8	17.5	116	122.9	33.5	220	9.26	2.13	8.34	754	27.7	58.9	6.45	27.8	5.86	1.16	6.42	0.82	5.47	1.14	4.82	0.519	3.08	0.527	5.72	0.71	1.91	21.3	12.7
Karapiti-Unit B-K11_10	76.3692	0.186698	13.1603	1.61171	0.0422568	0.170052	1.56684	3.78838	3.10449	0.158297	0.208539	24.5996	6.89287		7.74	1322	2.61	445	1.54	3.8	41.9	18.3	121.9	123.9	34	235	9.65	1.96	8.71	765	28.9	62.6	7	29.4	6.1	1.04	6.6	0.81	5.74	1	4.78	0.579	3.59	0.54	5.95	0.72	1.97	20.8	13.06
Karapiti-Unit B-K11_11	76.2669	0.206344	13.2156	1.73203	0.0489274	0.171405	1.59167	3.64818	3.11897	0.134542	1.5014	24.4526	6.76715		7.58	1374	2.74	439	1.84	2.23	57.7	17.3	116.2	124.6	33.5	231	9.12	1.87	8.87	776	28.5	59.9	6.72	28.1	6.5	1.18	6.7	0.88	5.94	1.18	4.91	0.68	3.98	0.59	6.03	0.59	1.8	20.2	12.39
Karapiti-Unit B-K11_12	76.5326	0.205504	13.1608	1.62117	0.0635405	0.136983	1.49626	3.6609	3.12232	0.156774	3.29659	24.5114	6.78322
Karapiti-Unit B-K11_13	76.496	0.208822	13.1648	1.60002	0.0726578	0.163601	1.52191	3.68837	3.08381	0.149182	0.507425	24.8057	6.77218
Karapiti-Unit B-K11_14	76.141	0.203619	13.3376	1.66331	0.0186227	0.160591	1.60145	3.79422	3.07957	0.167148	2.95578	24.7246	6.87379
Karapiti-Unit B-K11_15	76.5328	0.188822	13.2182	1.6528	0.0565116	0.129776	1.50218	3.55379	3.16503	0.169721	1.92873	24.1808	6.71882
Karapiti-Unit B-K11_16	76.3588	0.197215	13.255	1.50139	0.0693189	0.130761	1.62694	3.78298	3.0776	0.117637	2.66745	24.8111	6.86058
Karapiti-Unit B-K11_17	77.0688	0.176996	12.944	1.41791	0.0543122	0.11975	1.39414	3.68063	3.14341	0.141203	2.39387	24.5176	6.82404
Karapiti-Unit B-K11_18	76.707	0.210328	12.9178	1.578	0.0852091	0.111253	1.45072	3.79226	3.14741	0.135174	0.390888	24.3715	6.93967
Karapiti-Unit B-K11_19	76.7364	0.200009	13.054	1.54373	0.047958	0.15767	1.4723	3.92882	2.85911	0.136097	0.489459	26.8393	6.78793
Karapiti-Unit B-K11_20	76.618	0.194765	13.2384	1.50233	0.0510637	0.145074	1.50385	3.72535	3.02118	0.12853	1.45609	25.3603	6.74653
Karapiti-Unit B-K11_21	76.7362	0.173372	13.1521	1.62851	0.0900291	0.151549	1.51876	3.65741	2.89206	0.138908	2.30739	26.5334	6.54947
Karapiti-Unit B-K11_22	77.2254	0.127329	12.9089	1.37911	0.0642261	0.134024	1.37883	3.60833	3.17388	0.157592	2.45299	24.3316	6.78221
Karapiti-Unit B-K11_23	76.4948	0.167835	13.1687	1.67006	0.049278	0.143375	1.53148	3.60947	3.16497	0.137489	0.242773	24.1692	6.77444
Karapiti-Unit B-K11_24	76.9159	0.170449	13.183	1.67338	0.00752572	0.121682	1.4593	3.47974	2.98899	0.149	3.9439	25.7331	6.46873
Karapiti-Unit B-K11_25	76.5654	0.160413	13.2011	1.76358	0.0941399	0.137058	1.42776	3.61584	3.03466	0.155994	1.45398	25.2303	6.6505
Average	76.6063	0.185159	13.1259	1.58092	0.0578393	0.141269	1.4805	3.66582	3.15627	0.144564	1.84317	24.4801	6.82209		7.05455	1161.73	2.60091	394.727	1.56636	2.93222	44.0545	16.2818	108.827	112.091	30.5909	208.991	8.41455	1.73091	7.99182	688.364	25.8455	55.1545	6.03273	25.3909	5.18909	1	5.48091	0.784	5.18	1.06909	4.77727	0.529364	3.39636	0.515273	5.69545	0.661091	1.65727	19.6182	11.9855
Standard Deviation	0.259035	0.0192303	0.106575	0.161431	0.0226283	0.0248664	0.139915	0.183703	0.359049	0.0161869	1.27166	1.93854	0.22858		1.31655	242.164	0.841742	79.2806	0.408834	2.02427	11.004	2.80208	18.891	14.5932	5.49208	38.6846	1.61623	0.383783	1.85646	135.442	4.60812	9.68456	1.11082	4.93973	1.03255	0.146833	1.24757	0.151364	1.07188	0.202754	0.975634	0.112425	0.658518	0.0933093	1.09215	0.156057	0.34837	3.75282	2.12552
Waiohau - K14b_01	78.5	0.12	12.27	1.04	0.07	0.17	0.9	3.73	3.07	0.13	0.83	25.57	6.8		17.2	751	0.9	385	Below LOD	1	30	11.9	108.8	77.3	21.9	92.4	6.96	Below LOD	4.41	843	22.35	47.6	4.68	20.1	2.93	0.44	3.05	0.42	3.44	0.89	2.34	0.34	2.24	0.45	3.12	0.44	0.88	13.8	9.69
Waiohau - K14b_02	78.28	0.12	12.25	1.03	0.06	0.16	0.86	3.87	3.22	0.16	0.22	24.3106	7.09		16.5	764	1.3	387	Below LOD	2.3	35	13.9	109.5	77.6	21.45	95.1	7.96	3.2	4.22	851	23.3	46.6	5.01	19.5	4.1	0.36	3.9	0.51	3.62	0.73	2.16	0.37	2.07	0.376	2.76	0.63	1.26	14.6	10.35
Waiohau - K14b_03	77.96	0.14	12.14	1.02	0.08	0.16	0.86	4.3	3.23	0.12	0	24.1362	7.53		17.4	743	1.3	387	0.86	2.3	35	13.1	111	77.1	21.8	94	7.77	2.1	4.23	869	22.37	47.6	4.88	18.7	3.2	0.95	3.63	0.72	3.5	0.57	2.11	0.38	2.79	0.38	3.14	0.74	1.61	14.92	10.19
Waiohau - K14b_04	77.77	0.12	12.74	1.05	0.02	0.14	0.91	3.73	3.36	0.16	0.43	23.1458	7.09		13.5	804	2.1	393	0.19	Below LOD	43	13.3	111.9	80.4	21.3	92.3	7.59	1.9	4.44	856	22.8	47.5	4.92	20.9	3.57	1.05	2.24	0.58	3.38	0.61	2.4	0.25	2.28	0.43	2.91	0.63	1.64	13.4	9.5
Waiohau - K14b_05	78.15	0.14	12.36	0.99	0.07	0.16	0.82	3.98	3.2	0.13	0.13	24.4219	7.18		19.8	792	3.1	415	0.12	1	56	13	118.3	79.9	23.41	95.2	8.41	2.9	4.69	895	23.12	49.6	5.5	20.3	4.59	1.14	4.14	0.58	4.82	0.72	2.69	0.289	2.8	0.554	3.17	0.57	1.55	15.26	9.77
Waiohau - K14b_06	78.01	0.15	12.35	1.11	0.05	0.19	0.88	3.82	3.25	0.18	1.4	24.0031	7.07		15.8	745	2.43	410.7	0.84	1.51	33.8	11	115.5	77.9	20.79	94.2	7.78	1.7	4.61	864	22.51	47.6	5.21	20.1	4.63	0.85	3.11	0.34	3.42	0.72	2.39	0.324	2.43	0.423	3.51	0.637	1.79	16.38	9.51
Waiohau - K14b_07	78.5	0.13	12.55	0.92	0.04	0.17	0.91	3.45	3.19	0.14	0.75	24.6082	6.64		17.7	749	1.6	408	0.47	0.76	40.7	12.6	111.2	78.3	20.95	93.1	7.67	0.6	4.52	849	22.62	46.54	4.97	19.66	4.26	0.7	2.89	0.57	3.94	0.6	2.65	0.27	2.6	0.417	3.03	0.711	1.54	15.07	9.26
Waiohau - K14b_08	77.78	0.09	12.41	1.05	0.04	0.17	0.9	4.27	3.19	0.11	1.56	24.3824	7.46		18.5	726	3.25	422	0.76	1.3	38.7	11.5	113.6	75.5	20.65	91.7	7.68	2.1	4.84	852	21.3	46.8	5.21	19.1	3.46	0.89	2.7	0.52	3.83	0.78	2.2	0.269	2.62	0.25	3.02	0.77	1.62	16.12	8.88
Waiohau - K14b_09	78.02	0.12	12.42	1.06	0.05	0.16	0.9	3.8	3.36	0.11	3.43	23.2202	7.16		18.8	733	1.25	415.7	0.21	1.81	32.4	12.5	111.4	73.4	20.51	90.9	7.89	0.5	4.49	842	21.07	47.4	5.26	18.6	4.15	0.93	2.73	0.51	3.5	0.81	2.28	0.245	2.72	0.295	2.8	0.662	1.89	14.67	9.68
Waiohau - K14b_10	78.25	0.11	12.45	1.02	0.03	0.14	0.9	3.76	3.18	0.16	1.48	24.6069	6.94		14.6	797	1.6	433	0.7	1.5	48.8	12.2	110	81.7	22.4	95	7.74	3.5	4.86	889	22.8	49	5.38	19.4	2.7	0.76	3.26	0.72	3.75	0.66	2.76	0.35	3.41	0.41	3.37	0.68	1.22	14.99	10.34
Average	78.122	0.124	12.394	1.029	0.051	0.162	0.884	3.871	3.225	0.14	1.023	24.2405	7.096		16.98	760.4	1.883	405.64	0.51875	1.49778	39.34	12.5	112.12	77.91	21.516	93.39	7.745	2.05556	4.531	861	22.424	47.624	5.102	19.636	3.759	0.807	3.165	0.547	3.72	0.709	2.398	0.3087	2.596	0.3985	3.083	0.647	1.5	14.921	9.717
Standard Deviation	0.262035	0.017127	0.167279	0.0495424	0.0191195	0.0147573	0.0291357	0.256491	0.0857969	0.024037	1.02118	0.699326	0.269287		1.93552	27.7777	0.80987	16.7229	0.310642	0.55495	8.07234	0.876863	2.92225	2.40252	0.897976	1.53221	0.359235	1.04894	0.222932	18.4029	0.721529	0.987018	0.251741	0.728822	0.684405	0.24998	0.583957	0.117856	0.429754	0.101154	0.229966	0.0502506	0.378394	0.0833417	0.235233	0.0934785	0.299407	0.909474	0.473381
Waiohau -LR_01	77.81	0.12	12.48	1.05	0.05	0.1	0.89	4.03	3.37	0.11	1.87	23.089	7.4		15.4	607	0.8	410	0.35	1.4	34.6	17.7	109	67.9	19.73	87.3	7.78	2	5.11	804	21.5	45.3	4.64	18.5	3.54	0.39	2.95	0.51	3.28	0.7	2.12	0.36	2.57	0.317	2.61	0.83	1.68	16.4	9.71
Waiohau -LR_02	78.03	0.15	12.34	0.96	0.04	0.14	0.92	3.99	3.26	0.17	5.11	23.9356	7.25		13.5	606	3.2	433	0.6	0.36	34.1	13.7	113.8	61.2	17.4	80.2	7.34	0.7	5.09	728	18.7	39.5	4.18	16.6	2.84	0.42	2.61	0.64	2.76	0.59	1.77	0.377	2.2	0.247	2.26	0.396	1.12	16.23	7.39
Waiohau -LR_03	77.3	0.14	12.92	1.03	0.04	0.19	0.88	3.85	3.52	0.13	5.77	21.9602	7.37		17.1	680	1.7	435.5	Below LOD	0.88	47.4	13.6	110.2	77.2	21.22	94	7.7	1.5	4.41	838	22.25	47.3	4.66	18.2	4.3	0.64	3.9	0.73	3.58	0.754	2.42	0.386	2.78	0.394	3.43	0.669	1.54	15.19	9.75
Waiohau -LR_04	78.09	0.13	12.3	1.08	0.05	0.16	0.9	3.95	3.18	0.15	5.45	24.5566	7.13		16.9	660	2.64	413	0.34	1.52	27	12.6	121.7	78.5	20.43	92.3	7.28	0.3	5.56	824	20.89	44.9	4.51	18.5	4.01	0.8	3.33	0.52	3.66	0.641	2.05	0.318	2.11	0.283	2.42	0.662	1.17	16.85	8.89
Waiohau -LR_05	78.02	0.14	12.25	1.14	0.07	0.17	0.94	4.02	3.08	0.17	7.05	25.3312	7.1		17	660	1.8	446.3	0.22	0.53	43.2	14.5	111.7	76.1	21.6	94.5	7.96	2.2	5.04	851	22.5	47.6	4.88	18.5	4.3	0.96	4.1	0.61	3.68	0.73	2.18	0.302	2.64	0.35	2.82	0.605	1.19	15.24	9.76
Waiohau -LR_06	78.19	0.11	12.62	0.92	0.07	0.14	0.88	3.49	3.42	0.15	3.3	22.8626	6.91		15	645	1.89	461	0.59	0.67	33.1	13.9	113.1	71.2	21.1	92.1	7.74	0.7	5.02	837	22.31	47.7	5.02	19.2	4.29	0.46	4.48	0.54	3.98	0.75	2.29	0.319	2.14	0.33	2.65	0.59	1.58	14.58	9.35
Waiohau -LR_07	78.58	0.17	12.12	1.04	0.07	0.16	0.92	3.76	3.06	0.13	6.8	25.6797	6.82		15.8	634	1	463.3	0.44	2.11	43	12.8	116.8	71.7	20.8	90.9	7.85	3	5.24	839	21.34	45.4	4.86	17.7	4.39	0.73	3.03	0.45	3.4	0.62	2.58	0.348	2.46	0.4	2.75	0.52	1.07	15.93	9.01
Waiohau -LR_08	78.21	0.13	12.19	1.19	0.06	0.17	0.84	3.67	3.4	0.14	6.14	23.0029	7.07		14.8	586	3.4	448	0.9	0.35	44.3	14	120.8	66.2	20.1	92	7.12	Below LOD	6.02	821	21.02	45	5.1	18.7	4.15	0.5	3.24	0.38	3.11	0.76	2.03	0.323	2.02	0.376	3.21	0.53	1.22	16.16	8.43
Waiohau -LR_09	78.14	0.13	12.67	1.04	0.04	0.14	0.95	3.63	3.12	0.13	3.22	25.0449	6.75		14.2	654	1.3	451	0.36	1.12	48.5	13.8	111.1	74.9	20.35	90.9	7.93	3	5.1	843	22.39	46.4	5.13	18.9	3.43	0.57	3.94	0.64	3.84	0.76	2.34	0.328	2.15	0.36	3.1	0.57	1.37	15.07	9.12
Waiohau -RNL_01	77.94	0.12	12.41	1.01	0.06	0.14	0.81	3.92	3.48	0.13	1.2	22.3966	7.4		10.7	608	1.5	444	Below LOD	0.9	42.8	16.3	109.6	66.7	23.07	76.6	8	3	4.6	919	23.85	49.8	5.49	19.9	3.83	0.89	4.14	0.77	3.44	0.69	2.61	0.42	2.89	0.38	2.39	0.73	0.9	15.14	9.88
Waiohau -RNL_02	77.87	0.11	12.69	0.92	0.07	0.13	0.82	4.03	3.2	0.16	0.54	24.3344	7.23		12.7	610	1.9	445	0.27	0.9	41.7	17.1	107.9	74.3	22.5	82.9	7.68	2.1	4.44	894	22.86	48.8	5.24	18.9	3.16	0.67	3.05	0.51	4.11	0.87	2.5	0.41	2.26	0.34	2.73	0.66	1.54	16.29	9.77
Waiohau -RNL_03	77.83	0.1	12.36	0.89	0.08	0.12	0.83	4.16	3.47	0.16	0.59	22.4294	7.63		8.9	566	Below LOD	438	0.39	1.2	36	15.6	105	64.5	21.1	70	8.15	5.1	4.38	863	22.98	47.2	5.13	18.7	4.8	1.17	3.52	0.81	3.84	0.69	2.34	0.34	2.36	0.39	2.8	0.52	1.2	15.11	9.08
Waiohau -RNL_04	78.24	0.1	12.43	0.75	0.04	0.12	0.76	3.97	3.44	0.14	1.96	22.7442	7.41		11	646	2.6	447	Below LOD	1.4	42.7	9.7	104.7	64.8	21	75.1	7.51	3.5	4.36	874	23.07	47.1	5.17	20	4.7	0.64	4.2	0.6	4.92	0.93	2.81	0.419	2.64	0.36	2.31	0.68	1.11	14.9	9.47
Waiohau -RNL_05	78.36	0.08	12.43	0.93	0.07	0.12	0.77	3.82	3.25	0.18	0.92	24.1108	7.07		12.9	608	0	448	Below LOD	0.6	38.7	16.5	107.1	66.2	24.3	78.6	7.93	Below LOD	4.7	896	23.07	49.1	5.31	20.5	5	0.56	2.82	0.53	4.59	0.78	2.43	0.55	3.59	0.51	2.36	0.61	1.29	14.9	9.92
Waiohau -RNL_06	78.04	0.07	12.61	0.82	0.05	0.12	0.8	4.04	3.28	0.15	0.91	23.7927	7.32		12	638	0.4	435	Below LOD	0.3	44.4	16.3	103.2	65.3	21.41	77	7.17	0.7	4.17	871	22.64	49.5	4.86	20.1	4.3	0.73	3.97	0.62	3.71	0.94	2.48	0.36	2.37	0.39	2.69	0.5	1.32	14.01	9.48
Waiohau -RNL_07	77.75	0.1	13.03	1	0.06	0.12	0.84	3.64	3.33	0.13	2.9	23.3483	6.97		9.9	745	0.8	460	Below LOD	Below LOD	37	13.5	110.5	68.6	22.85	77.1	7.59	2	4.35	917	23.52	51.4	5.5	23	4.33	0.83	3.1	0.48	3.56	0.75	2.33	0.41	2.75	0.4	2.37	0.73	1.54	15.55	9.19
Waiohau -RNL_08	78.02	0.11	12.61	0.71	0.07	0.08	0.79	4.23	3.27	0.11	2.15	23.8593	7.5		13	744	0.8	438	0	Below LOD	25.4	12.6	105	67.1	23.61	85.9	7.84	Below LOD	4.42	884	24.83	49.8	5.21	22.5	4.39	0.82	4.4	0.49	3.45	0.99	2.04	0.47	3.02	0.4	2.98	0.72	2	13.3	10.28
Waiohau -RNL_09	78.21	0.11	12.51	0.93	0.06	0.12	0.77	3.84	3.39	0.06	0.14	23.0708	7.23		12	741	1.8	454	0.22	Below LOD	40	14.1	105.7	68.5	22.7	76.4	7.77	Below LOD	4.46	916	24.24	50.5	5.48	20.3	3.43	0.66	3.31	0.71	4	1.04	2.44	0.36	2.65	0.384	2.76	0.624	1.78	15.5	9.74
Waiohau -RNL_10	77.78	0.09	13.02	0.83	0.07	0.13	0.7	3.8	3.45	0.13	1.18	22.5449	7.25		11	743	Below LOD	446.5	0.09	1.1	39.4	11.1	112.2	66.3	23.08	74.4	8.08	1.5	4.18	923	23.77	50.2	5.44	20.2	5	0.54	3.01	0.42	4.1	0.77	2.74	0.338	3.08	0.293	2.54	0.72	1.28	14.45	9.76
Average	78.0216	0.116316	12.5258	0.96	0.0589474	0.135263	0.842632	3.88632	3.31421	0.138421	3.01053	23.5839	7.20053		13.3579	651.632	1.61941	442.979	0.366923	0.95875	39.1211	14.1789	110.479	69.3263	21.4921	83.5895	7.70632	2.08667	4.77105	860.105	22.5121	47.5	5.04263	19.4158	4.11526	0.683158	3.53158	0.576842	3.73737	0.776579	2.34211	0.375684	2.56211	0.363368	2.69368	0.624526	1.36316	15.3053	9.36737
Standard Deviation	0.274515	0.0245426	0.260903	0.1253	0.0128646	0.0263246	0.0688672	0.191521	0.14033	0.0271341	2.3255	1.05922	0.233535		2.47124	55.9575	0.952605	14.0702	0.234357	0.497056	6.27265	2.0433	5.19343	4.8695	1.61661	7.94627	0.301519	1.28889	0.503619	48.5282	1.40708	2.77028	0.362228	1.5356	0.605937	0.198076	0.582096	0.119353	0.497436	0.124091	0.263809	0.0609198	0.401491	0.0566218	0.319986	0.103734	0.276165	0.883531	0.65052
Rotorua - K15_01	77.69	0.05	12.42	0.76	0.06	0.08	0.61	3.85	4.34	0.13	1.14	17.9009	8.19		16.7	391	1.93	478	0.48	1.88	29.8	11.5	157.4	33.6	22.01	62.4	8.17	2	7.44	785	25.7	53.6	5.4	19	4.03	0.42	2.68	0.55	3.43	0.7	2.04	0.44	2.33	0.31	2.9	0.777	2.41	18.2	14.38
Rotorua - K15_02	76.7	0.22	12.8	1.31	0.06	0.27	1.29	4.26	2.97	0.12	0.64	25.8249	7.23		18.7	1093	4.82	426	1.03	1.72	38.4	12.5	98.9	111.9	20.67	162.8	7.29	3.2	4.33	836	20.9	43.17	4.43	17.6	3.84	0.77	3.37	0.49	3.6	0.697	2.13	0.24	2.4	0.271	4.55	0.69	1	14.12	8.52
Rotorua - K15_03	77.96	0.06	12.42	0.86	0.08	0.08	0.76	3.65	4	0.12	0.1	19.49	7.65
Rotorua - K15_04	77.5	0.05	12.7	0.8	0.06	0.07	0.64	3.74	4.31	0.13	0.1	17.9814	8.05		16.3	379	0.8	501	Below LOD	1.6	39.1	12.5	152	36.5	23.6	70.1	8.99	4.4	7.39	856	28.3	57.51	6.19	20.7	3.77	0.41	3.29	0.65	3.54	0.81	2.7	0.429	2.7	0.39	2.62	1.03	2.68	19.3	16.07
Rotorua - K15_05	77.55	0.08	12.4	0.82	0.06	0.04	0.64	4.02	4.21	0.17	0.08	18.4204	8.23		19.3	434	0.8	507	Below LOD	2.3	40.4	13.9	154.8	37.4	22.8	67.1	9.07	2.3	7.59	845	27.9	56	6.04	20.7	3.9	0.7	2.64	0.46	3.96	0.74	2.39	0.4	2.52	0.44	2.7	0.92	2.1	18.03	14.65
Rotorua - K15_06	77.68	0.06	12.44	0.88	0.05	0.04	0.76	3.55	4.39	0.15	0.34	17.6948	7.94		19.6	459	2	506	0.28	2.9	17	14	158	49.8	21.5	71.8	8.2	1.4	8.31	872	28.2	56.2	5.83	17.9	3.3	0.92	2.97	0.35	2.95	0.7	2.36	0.3	2.62	0.38	2.74	0.88	1.9	19.1	14.43
Rotorua - K15_07	77.23	0.09	12.63	0.92	0.06	0.1	0.65	3.96	4.25	0.12	2.15	18.1718	8.21
Rotorua - K15_08	77.65	0.07	12.79	0.88	0.06	0.08	0.75	3.54	4.06	0.13	0.53	19.1256	7.6		14.8	419	0.51	476	0.57	2.5	40.8	13	148.8	53	19.1	69.4	7.75	2.7	7.89	841	26.1	53.5	5.1	16.5	2.93	0.19	2.95	0.38	2.62	0.717	1.65	0.229	2.64	0.41	2.6	0.89	2.13	18.87	13.9
Rotorua - K15_09	77.72	0.06	12.43	0.94	0.04	0.06	0.6	3.63	4.37	0.13	0.5	17.7849	8		16.3	383	1.1	521	0.75	1.69	36.4	12.1	152.9	36.2	22.41	68.1	8.89	1.4	6.88	830	27.95	58.2	5.74	20.8	3.55	0.25	4.09	0.58	4.31	0.78	2.47	0.338	3.1	0.437	2.7	0.93	2.21	18.24	15.58
Rotorua - K15_10	77.68	0.05	12.21	0.94	0.07	0.06	0.63	3.83	4.38	0.15	0.78	17.7352	8.21		15.5	382	1.7	536	0.22	2.6	19.9	13.1	165.8	32.4	19.4	58.2	8.88	0.7	8	776	25.5	54.3	5.35	19.5	2.68	0.4	2.41	0.6	3.07	0.69	1.88	0.37	1.65	0.31	2.38	0.77	2.5	19.92	12.6
Average	77.536	0.079	12.524	0.911	0.06	0.088	0.733	3.803	4.128	0.135	0.636	19.013	7.931		17.15	492.5	1.7075	493.875	0.555	2.14875	32.725	12.825	148.575	48.85	21.4363	78.7375	8.405	2.2625	7.22875	830.125	26.3187	54.06	5.51	19.0875	3.5	0.5075	3.05	0.5075	3.435	0.72925	2.2025	0.34325	2.495	0.3685	2.89875	0.860875	2.11625	18.2225	13.7662
Standard Deviation	0.347345	0.0513052	0.194548	0.152348	0.0105409	0.0666333	0.205375	0.229495	0.428481	0.0164992	0.629642	2.46939	0.335177		1.8095	244.345	1.377	33.9303	0.30244	0.490173	9.49267	0.856488	20.7028	26.5659	1.60422	34.2548	0.656266	1.17344	1.24938	33.3014	2.48106	4.72924	0.569561	1.63133	0.488321	0.259656	0.530848	0.106603	0.549311	0.0441645	0.342251	0.0812944	0.41328	0.0637764	0.683153	0.108617	0.514558	1.77684	2.3633
Rotorua - LR_02	78.38	0.05	12.31	0.71	0.07	0.08	0.63	3.27	4.31	0.2	5.9	18.1856	7.58
Rotorua - LR_03	77.79	0.17	12.12	1.12	0.07	0.22	1.16	3.99	3.24	0.11	2.24	24.0093	7.23		14.4	855	3.48	450	1.46	1.51	47.5	13.3	104.5	100.3	19.8	132.2	7.98	1	4.5	859	20.8	44.5	4.76	17.9	2.62	0.55	2.75	0.6	3.51	0.78	2.42	0.35	2.73	0.38	2.94	0.557	1.51	13.39	9.37
Rotorua - LR_04	77.41	0.18	12.48	1.08	0.06	0.18	1.23	4.1	3.11	0.16	5.34	24.8907	7.21		13.9	798	3.1	437	0.69	1.37	52	14.7	102.7	97	18.82	123.4	7.64	1.4	3.99	814	20.5	42.7	4.22	18.2	2.83	0.91	2.69	0.35	3.08	0.601	2.23	0.4	2.47	0.357	3.47	0.6	1.4	14.05	8.89
Rotorua - LR_05	77.12	0.15	12.89	1.17	0.01	0.13	1.16	4.03	3.24	0.11	4.83	23.8025	7.27		16.1	846	3.7	464	1.01	1.17	57	12.2	111.8	92.1	20	144.5	7.78	3.1	4.93	824	21.7	45.9	4.79	16.8	4	0.91	2.78	0.58	3.84	0.71	2.14	0.429	3.06	0.26	3.61	0.6	1.66	14.2	10.04
Rotorua - LR_06	76.15	0.23	13.11	1.5	0.1	0.3	1.39	4.09	3.01	0.11	3.1	25.299	7.1		16.8	1068	5.7	496	0.44	1.18	50	15	97.3	118.8	21.02	179.4	7.4	1.3	3.95	822	19.6	42.6	4.65	17.5	2.71	0.8	3.73	0.67	3.19	0.647	2.45	0.372	2.85	0.398	4.53	0.583	1.26	13.02	8.67
Rotorua - LR_07	77.57	0.15	12.8	1.36	0.06	0.22	1.25	3.49	3.01	0.1	6.7	25.7708	6.5		19.4	655	3.1	435	1.35	2.34	76	13.8	118.2	64	24.5	115.9	7.87	2.8	5.37	758	22.6	49.1	5.32	20.6	3.85	0.94	4.02	0.75	4.54	0.76	2.51	0.397	2.66	0.357	3.49	0.696	1.17	15.9	9.38
Rotorua - LR_08	77.5	0.18	12.41	1.26	0.06	0.19	1.2	3.93	3.14	0.13	5.1	24.6815	7.07		17.2	921	3.1	450	0.8	1.3	38.1	11.1	106.2	100.8	20.71	156.6	7.37	2.3	4.35	818	21.14	43.2	4.71	16.2	3.05	0.74	2.46	0.57	3.49	0.67	2.09	0.397	2.12	0.394	3.82	0.632	1.21	13.99	10.04
Rotorua - RNL_01	76.54	0.22	12.94	1.26	0.07	0.21	1.28	4.16	3.19	0.12	1.53	23.9937	7.35		16.1	1637	3.6	450	0.43	Below LOD	47.6	12.9	102.2	113.9	21.37	171.5	7.68	Below LOD	4.37	841	20.52	43.3	4.77	17	4.1	0.83	3.77	0.48	3.5	0.92	2.1	0.36	2.67	0.34	4.31	0.64	1.21	13.83	8.79
Rotorua - RNL_02	76.55	0.22	12.75	1.31	0.07	0.22	1.4	4.15	3.18	0.15	2.56	24.0723	7.33		16.9	1699	3.4	451	1.02	Below LOD	50.2	15.9	101.3	112.3	21.13	171.5	7.48	Below LOD	4.62	861	21.4	44.5	5.01	19.1	3.6	0.83	2.54	0.35	3.72	0.87	2.12	0.45	2.65	0.25	4.49	0.55	1.15	14.49	9.3
Rotorua - RNL_03	78.21	0.08	12.39	0.83	0.05	0.06	0.5	3.48	4.21	0.19	6.96	18.5772	7.69		11.5	693	0	296	0.4	2.7	41.2	17.2	146.1	27.33	32.6	95	9.01	Below LOD	6.09	791	29.5	62.2	6.78	25.9	6.2	0.93	4.7	0.86	5.69	1.22	3.37	0.49	3.93	0.59	3.44	0.76	2.13	19	13.03
Rotorua - RNL_04	77.92	0.08	12.13	1.21	0.04	0.08	0.57	3.93	3.83	0.19	5.5	20.3446	7.76		13.4	832	1.2	363.8	Below LOD	0.8	54.1	14.9	134.6	33	32.5	102.3	10.2	Below LOD	6.05	786	28.2	63.1	6.67	26.9	5.7	0.49	5.62	0.89	6.59	1.31	4.31	0.58	3.95	0.56	2.96	0.82	1.72	18.75	12.64
Rotorua - RNL_05	78.18	0.05	12.29	1.03	0.04	0.03	0.55	3.58	4.03	0.22	7.32	19.3995	7.61		14.7	803	Below LOD	345	Below LOD	0.5	43.2	15.5	136.7	30.4	31.9	102.1	9.53	0.2	5.53	772	28.99	61.5	6.64	25.8	6.5	0.57	5.96	0.92	5.53	1.1	3.73	0.482	3.14	0.61	3.74	0.81	1.55	19.13	12.01
Rotorua - RNL_07	77.88	0.11	12.66	1.17	0.05	0.11	0.93	3.69	3.26	0.12	6.81	23.8896	6.95		10.6	885	0.7	439	0.61	1.56	35.3	11.1	118.5	65.7	19.63	89	7.42	4.5	6.41	807	24.48	48.9	5.16	16	3.4	0.31	2.89	0.53	4.15	0.82	1.45	0.33	2.31	0.26	2.72	0.77	2.14	15.95	13.41
Rotorua - RNL_08	78.26	0.1	12.23	1.15	0.03	0.05	0.64	3.48	3.81	0.25	5.81	20.5407	7.29		9.4	871	4.1	339	0.6	1.1	51.7	13.7	139.7	33.6	33.2	104.8	10.08	7.4	6.7	803	29	60.5	7.11	26.6	6	0.15	5.15	1.22	5.9	1.32	3.29	0.6	3.71	0.648	4.44	0.82	2.42	19.3	12.38
Rotorua - RNL_09	77.18	0.21	12.64	1.29	0.02	0.16	1.28	3.86	3.22	0.14	5.6	23.9689	7.08		12.5	1589	8.4	652	0.36	Below LOD	27.2	14.1	104.6	110.9	22.9	168	7.09	4.5	4.59	861	21.35	43.5	4.59	17.7	3.28	0.57	3.8	0.86	4.4	0.94	2.36	0.356	2.59	0.29	4.22	0.44	1.4	13.88	9.18
Rotorua - RNL_10	77.79	0.08	12.17	0.99	0.07	0.08	0.56	4.01	4.05	0.19	6.13	19.2074	8.06		11	648	0	337	0.06	1.2	49.7	16.2	130.8	28.9	31	101.6	8.57	Below LOD	5.69	731	26.2	59.9	6.27	23.1	5.2	1.02	4.5	0.81	5.3	0.91	3.27	0.54	2.51	0.4	3.56	0.68	1.61	19.65	11.17
Rotorua - RNL_11	76.97	0.19	12.98	1.32	0.04	0.17	1.31	3.55	3.36	0.12	2.98	22.9077	6.91		9.7	1140	3	441	0.06	1.8	43.8	15.3	117.4	90.7	20.4	135.6	7.22	5.8	5.2	846	23.61	47.6	4.8	18.4	3.58	0.93	3.45	0.67	3.92	0.82	1.96	0.43	2.57	0.37	3.03	0.69	1.35	15.15	11.84
Rotorua - RNL_12	77	0.21	12.68	1.49	0.06	0.22	1.44	3.65	3.12	0.12	4.63	24.6795	6.77		17	1470	5.5	447	0.35	1.8	47.5	14.2	100.5	116.2	21.7	183	8.25	4	4.16	844	20.89	43	4.6	20.3	3.63	0.95	3.39	0.66	3.05	0.73	1.87	0.58	2.68	0.43	4.88	0.49	0.92	13.48	8.86
Rotorua - RNL_13	78.05	0.1	12.63	0.86	0.04	0.12	0.78	3.89	3.38	0.15	0.59	23.0917	7.27		14.7	586	Below LOD	434	0.88	0.7	46.8	12.9	106.3	64.7	22.75	77.3	8.62	2.5	4.26	901	23.77	49.1	5.29	20.6	4.36	0.66	3.93	0.57	3.65	0.93	2.59	0.48	2.99	0.313	2.96	0.69	1.17	15.22	9.83
Rotorua - RNL_14	77.86	0.19	12.19	1.26	0.07	0.2	1.3	3.79	2.99	0.15	1.51	26.0401	6.78		14.5	1083	6.1	418	1.24	1.2	44.7	10.7	99.4	111.6	21.06	163.2	6.85	3.8	4.31	852	20.96	43.5	4.83	18.8	3.57	1.21	3.03	0.47	3.28	0.84	2.3	0.25	2.35	0.42	3.78	0.51	1.14	14.55	9.07
Rotorua - RNL_15	77.7	0.2	12.57	1.33	0.02	0.19	1.33	3.47	3.08	0.1	2.89	25.2273	6.55		12.1	969	3.6	395	0.66	2.1	52.6	11.4	99.1	111.9	20.4	167	7.63	8.4	4.26	845	20.3	41.75	4.13	16.8	4.3	0.72	3	0.5	3.45	0.78	1.94	0.209	2.22	0.215	4.57	0.44	1.36	14.39	9.07
Rotorua - RNL_16	78.1	0.07	12.42	0.99	0.06	0.08	0.83	3.26	4.03	0.16	2.48	19.3797	7.29		11.8	361	2.2	420	0.65	2.2	36.4	14.1	141.5	51.9	18.7	67.9	7.65	5.1	7.38	812	25.23	51.2	5.09	18.7	2.33	0.23	2.56	0.43	3.7	0.79	1.58	0.242	2.26	0.247	2.76	0.73	1.51	17.47	14.58
Rotorua - RNL_17	76.9	0.2	12.66	1.59	0.03	0.24	1.32	3.96	2.99	0.1	1.2	25.7191	6.95		9.9	983	5.6	427	0.1	2.4	56.7	16.1	98.1	108.2	20.12	174.5	7.25	3.5	4.08	783	18.98	39.7	4.26	19.4	3.3	1.23	3.84	0.36	3.55	0.78	1.8	0.23	2.39	0.2	4.43	0.68	1.32	15.74	8.31
Rotorua - RNL_18	78.34	0.06	12.41	0.88	0.03	0.07	0.71	3.23	4.09	0.17	3.62	19.154	7.32
Rotorua - RNL_19	77.54	0.07	12.73	0.95	0.06	0.05	0.98	3.9	3.56	0.16	3.54	21.7809	7.46		12.1	572	3.2	401	0.86	Below LOD	34.3	17.5	133.5	74.4	18.1	101.7	7.98	2.8	6.31	821.8	23.3	46.6	5.05	18.9	3.64	0.39	2.71	0.21	3.27	0.61	2	0.34	2.24	0.33	3.28	0.79	1.97	15.27	12.21
Rotorua - RNL_20	77.81	0.07	12.54	0.97	0.05	0.08	0.75	3.28	4.31	0.14	5.09	18.0534	7.59		9.3	438	1.2	441	Below LOD	1.9	39.8	11.2	144.1	50.6	18.65	66.6	8.06	3.4	7.38	799	24.7	50.8	4.81	18.5	3.7	0.37	2.58	0.52	2.34	0.69	2.05	0.233	2.57	0.26	2.8	0.85	2.05	17.18	14.01
Rotorua - RNL_21	77.57	0.19	12.95	1.25	0.04	0.21	1.33	3.36	2.96	0.13	6.14	26.2061	6.32		16	1075	4.2	416	0.4	1	44.2	17.7	99.3	103.7	18.7	167.6	6.97	-0.1	4.84	772	18.4	39.6	4.54	17.7	3.4	0.33	2.3	0.83	2.69	0.72	2.16	0.398	2.31	0.19	4.99	0.55	1.41	16.2	8.45
Average	77.5656	0.141111	12.5585	1.16037	0.0507407	0.146296	1.03	3.72519	3.47074	0.147778	4.3	22.699	7.19593		13.64	939.08	3.39913	425.792	0.655909	1.51571	46.704	14.108	115.776	80.5172	22.8664	130.488	7.9832	3.385	5.1728	816.952	23.0448	48.33	5.154	19.736	3.954	0.7028	3.526	0.6264	3.9732	0.85072	2.4036	0.397	2.7172	0.36276	3.7288	0.65512	1.5096	15.7272	10.5812
Standard Deviation	0.592552	0.0625935	0.281803	0.217229	0.0201773	0.0734924	0.320924	0.304206	0.464608	0.0390595	1.97408	2.733	0.402131		2.85526	354.26	2.02413	66.3654	0.39494	0.597173	9.56179	2.07804	17.1062	32.4754	5.00876	37.9369	0.903681	2.2015	1.06182	38.3618	3.26014	7.37612	0.848052	3.31045	1.13384	0.297385	1.01797	0.227301	1.06394	0.199301	0.685911	0.112863	0.506372	0.127504	0.706973	0.121505	0.376248	2.07718	1.94146
Rerewhakaiitu -K17_01	77.21	0.06	12.52	0.87	0.05	0.08	0.77	4.33	3.97	0.15	3.03	19.4484	8.3		18.7	416	1.8	461	0.41	1.3	26.6	13.9	141	48.4	16.6	63	7.04	1.3	7.12	761	22.67	46.2	4.43	15.5	2.63	0.06	2.37	0.43	2.46	0.57	2.01	0.225	1.68	0.3	2.62	0.77	1.97	18.7	12.42
Rerewhakaiitu -K17_02	77.89	0.07	12.82	0.84	0.05	0.09	0.76	3.24	4.06	0.17	5.97	19.1847	7.3		17.8	447	2.2	489	0.58	2.5	29.2	13.9	145	56.1	19.17	72.4	7.72	1.5	7.86	843	25.8	53.4	5.15	18.41	3.72	0.3	2.55	0.35	2.61	0.69	1.66	0.379	2.15	0.38	2.75	0.9	1.38	17.44	14.26
Rerewhakaiitu -K17_03	78.01	0.07	12.62	0.82	0.05	0.08	0.8	3.48	3.92	0.14	2.2	19.9005	7.4		18.4	451	1.7	472	Below LOD	1.79	31.7	13.6	147.7	49.7	17.1	68.7	7.73	0.7	7.45	800	23.6	49.1	4.85	15.2	1.82	0.05	2.6	0.43	2.31	0.5	1.95	0.37	2.07	0.28	2.51	0.93	2.12	17.7	13.22
Rerewhakaiitu -K17_04	77.59	0.09	12.07	0.98	0.08	0.08	0.73	3.81	4.41	0.16	1.05	17.5941	8.22		14	414	0.76	478	Below LOD	1.18	31	12.2	143.2	50	18.15	69.6	6.9	2.4	6.71	814	25.1	51.5	5.19	17.34	2.46	0.14	3.23	0.23	2.47	0.64	2.52	0.38	2.39	0.314	2.32	0.62	2.12	17.91	13.88
Rerewhakaiitu -K17_05	78.24	0.12	12.34	0.97	0.04	0.14	0.87	3.95	3.19	0.13	3.38	24.5266	7.14		17	698	0	453	0.63	1.68	51	13.5	112.7	80.4	22.7	97.9	8.21	1.9	5.18	891	24.4	50.3	5.32	20.5	2.8	0.78	3.04	0.61	3.83	0.97	2.72	0.351	2.21	0.4	2.98	0.56	1.71	16.3	10.64
Rerewhakaiitu -K17_06	77.54	0.06	12.77	0.95	0.04	0.1	0.81	3.65	3.91	0.17	4.13	19.8312	7.56		19.1	426	0.3	471	0.72	2.33	38.6	15.2	144.1	54.1	17.84	69	7.46	2	7.1	815	25.25	50.7	4.88	18.5	2.37	0.56	3.3	0.42	3.22	0.57	1.89	0.343	2.52	0.344	2.61	0.85	2.02	17.02	14.49
Rerewhakaiitu -K17_07	77.49	0.05	12.83	0.99	0.06	0.09	0.7	3.65	3.99	0.15	2.18	19.4211	7.64
Rerewhakaiitu -K17_08	77.86	0.12	12.64	1.01	0.06	0.14	0.9	3.57	3.51	0.19	5.87	22.1823	7.08		15.4	736	3.7	434.3	1.15	0.9	43	14.5	115.7	80.2	23.4	98.1	8.39	2.1	5.37	891	24.18	49.7	5.11	22.3	4.3	0.79	3.02	0.73	3.79	0.76	2.16	0.41	3.26	0.53	3.31	0.64	1.71	18.67	10.7
Rerewhakaiitu -K17_09	77.47	0.09	12.75	0.96	0.05	0.08	0.78	3.87	3.83	0.12	1.37	20.2272	7.7		18.1	443	0.94	460	0.32	1.75	39.8	13.6	148.3	58.2	18.58	72.6	7.45	2.3	7.22	840	26.37	51.92	5.05	19.6	2.64	0.71	3	0.57	2.84	0.66	2.06	0.333	2.03	0.297	3.07	0.77	1.86	17.62	14.94
Rerewhakaiitu -K17_10	77.42	0.08	12.85	1.01	0.02	0.09	0.82	3.43	4.14	0.14	6.17	18.7005	7.57
Rerewhakaiitu -K17_11	77.59	0.09	12.07	0.98	0.08	0.08	0.73	3.81	4.41	0.16	1.05	17.5941	8.22		17	434	1.4	470	0.59	1.74	30.9	12.1	147.1	50.7	18.29	69.2	7.28	1.1	7.14	816	24.96	51.8	5.01	18	2.7	0.5	2.3	0.46	3.2	0.582	1.96	0.418	2.08	0.414	2.29	0.79	2.07	17.8	14.14
Average	77.6645	0.0818182	12.5709	0.943636	0.0527273	0.0954545	0.788182	3.70818	3.94	0.152727	3.30909	19.8737	7.64818		17.2778	496.111	1.42222	465.367	0.628571	1.68556	35.7556	13.6111	138.311	58.6444	19.0922	75.6111	7.57556	1.7	6.79444	830.111	24.7033	50.5133	4.99889	18.3722	2.82667	0.432222	2.82333	0.47	2.97	0.660222	2.10333	0.356556	2.26556	0.362111	2.71778	0.758889	1.88444	17.6844	13.1878
Standard Deviation	0.300145	0.0231595	0.290464	0.0678635	0.0173729	0.0229624	0.0604679	0.294375	0.355021	0.0200454	1.97617	1.99342	0.431203		1.65739	126.247	1.11617	15.7372	0.266798	0.514541	7.8959	0.98545	13.8823	12.6889	2.37489	12.9888	0.496264	0.580948	0.915671	41.906	1.13028	2.07017	0.259203	2.26376	0.742917	0.303017	0.373062	0.147902	0.572232	0.139321	0.326688	0.0569454	0.44111	0.0791493	0.344629	0.128301	0.246734	0.749101	1.6036
Rerewhakaiitu -LR_01	77.98	0.08	12.27	0.94	0.04	0.06	0.78	3.64	4.07	0.14	1.31	19.1597	7.71		13.4	389	1	470	0.46	0.64	30.6	13.8	146	52.1	17.6	68.1	7.04	2.8	6.68	808	23.59	49.1	4.79	15.8	2.72	0.75	2.89	0.41	2.37	0.67	2.04	0.25	2.4	0.37	2.21	0.86	1.48	16.91	13.49
Rerewhakaiitu -LR_02	78.15	0.11	12.58	0.98	0.05	0.12	0.88	3.84	3.16	0.13	0.92	24.731	7		16	608	2	447	0.6	1.14	44.9	12.8	109.6	76.2	21.46	92.9	7.48	Below LOD	4.47	836	21.83	46.1	4.87	18.6	3.45	0.71	2.8	0.23	3.64	0.65	2.12	0.382	2.39	0.422	3	0.639	1.21	15.4	9.27
Rerewhakaiitu -LR_03	77.97	0.12	12.31	1.1	0.06	0.15	0.92	3.94	3.27	0.17	5.04	23.844	7.21		16.5	598	1.4	440	0.47	2.11	36.3	13	112.8	72.3	21.6	86.8	7.74	1.2	4.68	845	21.9	47.3	5.14	18	3.95	0.72	3.7	0.73	3.75	0.645	2.31	0.337	3.25	0.293	3.3	0.57	1.36	15.05	9.57
Rerewhakaiitu -LR_04	77.72	0.06	12.49	1	0.04	0.08	0.82	3.46	4.21	0.12	3.06	18.4608	7.67		13.9	281	0	328	0.73	1.18	14.7	16.8	100	231	9	38.5	5.32	2.3	4.52	677	16.3	31.3	2.79	10.4	1	1.01	1.83	0.21	1.38	0.15	1	0.159	1.15	0.18	1.21	0.46	1.04	13.2	6.3
Rerewhakaiitu -LR_05	78.21	0.11	12.33	0.74	0.09	0.09	0.81	3.38	4.1	0.16	0.61	19.0756	7.48		13.6	369	1.4	459	0.44	1.78	28.7	11.6	144	51.5	16.96	68.9	7.02	2	6.81	799	23.93	49.6	5	16.71	3.07	0.6	3.8	0.14	2.96	0.502	1.69	0.22	2.35	0.28	2.31	0.88	1.96	15.91	13.84
Rerewhakaiitu -LR_06	77.83	0.07	12.53	0.95	0.06	0.1	0.7	3.57	4.01	0.18	5.25	19.409	7.58		14.7	395	2.5	456	1.7	1.12	31.3	15.8	141.8	59.3	21.7	82	6.5	Below LOD	6.7	784	24	51.8	5.12	16.9	2.9	0.57	3.41	0.35	3.11	0.54	2.05	0.45	3.18	0.39	2.95	0.7	1.56	16.4	12.7
Rerewhakaiitu -LR_07	78.01	0.07	12.44	0.94	0.06	0.09	0.75	3.36	4.14	0.13	2.78	18.843	7.5		12.7	381	0.5	442.2	0.57	0.7	24.1	12.4	141.2	46.5	15.6	60.3	6.81	1.9	6.81	718	22.2	44.1	4.32	14.7	3.24	0.52	3.13	0.44	2.47	0.6	1.46	0.27	1.8	0.249	2.24	0.76	1.74	16.52	11.8
Rerewhakaiitu -LR_08	78.15	0.08	12.23	0.95	0.04	0.12	0.82	3.6	3.85	0.16	4.64	20.2987	7.45
Rerewhakaiitu -LR_09	78.5	0.12	12.27	0.98	0.05	0.15	0.87	3.58	3.36	0.11	4.2	23.3631	6.94		16.5	494	1.2	431.7	0.87	1.85	34.1	12.6	125.8	73.9	18	76	6.59	3.7	5.11	766	20.4	45	4.67	17.48	4.07	0.8	2.88	0.29	2.95	0.507	1.93	0.217	2.56	0.355	2.52	0.56	1.46	16.4	9.02
Rerewhakaiitu -RNL_01	78.06	0.09	12.08	1.12	0.02	0.06	0.58	3.83	3.93	0.22	1.25	19.8626	7.76		14.6	570	3	338	0.6	1.7	45.8	13.6	135.8	31.5	34.7	105.5	9.13	Below LOD	5.21	783	28.42	62.4	6.37	28.5	6.8	0.65	5.3	0.79	6.1	1.25	3.43	0.65	3.52	0.66	3.66	0.85	1.9	18.6	12.43
Rerewhakaiitu -RNL_02	78.16	0.09	12.28	1.15	0.02	0.07	0.52	3.68	3.81	0.21	3.56	20.5144	7.49		13.6	596	0	311	Below LOD	1.5	46.8	10	140.8	27.3	33	96.4	9	4.8	5.75	784	29	61.6	6.83	28.3	5.1	0.39	4.09	0.76	5.7	1.31	3.52	0.6	3.4	0.39	4.02	0.82	2.53	19.97	13.1
Rerewhakaiitu -RNL_03	78.13	0.12	12.26	1.09	0.04	0.11	0.76	3.4	3.94	0.16	2.35	19.8299	7.34		20.2	873	1.9	299	0.9	Below LOD	43.7	10.7	135.4	60.5	25.8	124.2	7.74	5.4	5.63	764	24.5	52.4	5.56	21	5.2	0.66	2.5	0.67	3.4	0.81	3.03	0.44	3.17	0.3	3.34	0.64	1.51	17.7	12.7
Rerewhakaiitu -RNL_04	77.95	0.09	12.31	1.02	0	0.07	0.66	3.75	4.03	0.11	3.06	19.3424	7.78		11.7	820	4.7	239	Below LOD	8.3	31.8	14.3	137.8	29.7	34	103	8.57	4.4	6.73	748	28	58.3	6.21	26.8	6.4	Below LOD	4.9	0.7	5.3	1.28	3.8	0.45	3.63	0.6	3.74	0.67	0.89	18.9	10.4
Rerewhakaiitu -RNL_05	78.14	0.13	11.99	0.99	0.06	0.16	0.93	3.82	3.61	0.16	4.44	21.6454	7.43
Rerewhakaiitu -RNL_06	77.67	0.07	12.54	1.1	0.06	0.09	0.67	3.44	4.17	0.19	3.18	18.6259	7.61		14.9	703	0	356	0.15	0.5	52.6	15.7	144.1	35.4	32.4	104.1	9.79	2.9	5.81	817	28.37	63	6.67	28.9	6.35	0.71	5.7	0.79	5.74	1.32	3.6	0.57	4.1	0.57	3.9	0.97	1.83	22.6	11.88
Rerewhakaiitu -RNL_07	77.91	0.1	12.65	0.9	0.04	0.05	0.8	2.92	4.48	0.14	0.74	17.3906	7.4		10.9	901	3.3	357.6	Below LOD	0.9	30	13.1	160.2	54.2	18.95	74.5	7.63	3.6	6.47	863	25.17	48.7	5.2	17.2	3.11	0.43	2.29	0.38	2.96	0.75	1.88	0.34	2.43	0.38	1.98	0.67	2.04	16.57	13.26
Rerewhakaiitu -RNL_08	78.06	0.09	12.44	0.95	0.06	0.08	0.76	3.54	3.9	0.12	0.87	20.0154	7.44		9	687	2.42	428	Below LOD	1.4	28.8	9.3	148.1	50.4	18.49	67	7.72	5.1	6.87	806	25.26	50.5	5.07	17.4	4	0.39	2.2	0.44	2.86	0.76	2.58	0.271	2.6	0.35	2.53	0.73	2.04	17.3	13.96
Rerewhakaiitu -RNL_10	78.42	0.12	12.04	0.97	0.06	0.12	0.85	4.17	3.11	0.15	3.77	25.2154	7.28		15.5	2320	14.9	301	Below LOD	13.8	48	21.2	126	89.6	24.3	107	9.4	2.3	6.19	732	23.7	51	5.54	20.6	5.4	0.63	3.6	0.55	4.6	1.22	2.14	0.5	2.75	0.42	3.2	0.72	2.3	18.3	11.2
Rerewhakaiitu -RNL_11	77.98	0.07	12.06	1.03	0.06	0.08	0.78	3.76	4.03	0.15	4.63	19.3499	7.79		9.4	900	4.4	411	Below LOD	6	28.1	14.7	156	54.7	19.62	69.5	8.02	0.1	7.39	805	23.62	46.9	5.26	16.7	3.3	0.2	1.83	0.48	2.67	0.82	1.7	0.37	1.7	0.37	2.56	0.79	1.92	16.8	13.04
Rerewhakaiitu -RNL_12	77.31	0.07	12.72	1.01	0.06	0.07	0.77	3.59	4.27	0.14	0.53	18.1054	7.86		14.7	671	0.7	424	Below LOD	2.2	38	12.7	150.9	53.7	18.43	69.5	7.36	3.5	6.76	825	25.63	50.4	5.32	19.1	3.8	0.54	2.87	0.16	2.51	0.76	1.84	0.31	2.06	0.29	2.54	0.82	1.91	17.8	14.35
Average	78.0155	0.093	12.341	0.9955	0.0485	0.096	0.7715	3.6135	3.8725	0.1525	2.8095	20.3541	7.486		13.9889	697.556	2.51778	385.472	0.680909	2.75412	35.4611	13.5611	136.461	63.8778	22.3117	83.0111	7.71444	3.06667	6.03278	786.667	24.2122	50.5278	5.26278	19.6161	4.10333	0.604706	3.31778	0.473333	3.58167	0.808	2.34	0.377	2.69111	0.381611	2.845	0.728278	1.70444	17.2406	11.795
Standard Deviation	0.26003	0.0217885	0.206344	0.0917935	0.0195408	0.0320197	0.105245	0.262624	0.380925	0.0305864	1.62995	2.23643	0.250313		2.68742	448.244	3.39602	69.6206	0.397906	3.49349	9.82477	2.73671	16.0925	44.9637	7.12793	21.1104	1.13882	1.49507	0.914818	47.0069	3.15951	7.57657	0.926929	5.21441	1.50417	0.18772	1.1233	0.223106	1.35013	0.335456	0.809088	0.140458	0.758302	0.123043	0.744709	0.129258	0.42754	2.04929	2.13156
Okareka-P_1	78.4533	0.136972	12.6946	0.889586	0.102942	0.135165	0.905569	3.51269	3.16921	0.201296	5.19838	24.7548	6.68191		4.28	946	2.46	432	0.95	2.14	33.4	14.1	105.2	69	22	99.1	8.54	1.93	4.88	1054	25.8	47.7	5.57	20	4.18	0.67	4.7	0.54	3.76	0.73	2.46	0.39	3.04	0.36	3.7	0.98	1.12	13.2	9.9
Okareka-P_2	78.5087	0.154083	12.6905	0.930989	0.0560777	0.118147	0.921479	3.58175	3.0382	0.200746	5.46682	25.8406	6.61995		4.06	787	2.41	424	0.73	3.49	14.2	13	92	65.3	21.9	90	7.9	1.64	3.81	960	23.3	43.5	4.17	18.1	3.38	0.53	3.08	0.52	3.36	0.88	2.02	0.285	2.11	0.31	2.55	0.69	1.01	12.1	10.5
Okareka-P_3	78.2334	0.118455	12.6172	0.83779	0.0463026	0.147484	0.900432	3.59059	3.50831	0.151964	3.72398	22.2995	7.09889		4.02	840	2.6	456	0.74	1.4	33.7	13.8	104	63.7	20.4	91	8.5	1.47	4.24	1050	25.2	50.1	5.33	17.4	3.57	0.5	3.05	0.45	3.38	0.58	1.55	0.34	2.51	0.301	2.94	0.69	0.87	13	9.7
Okareka-P_4	78.5093	0.152738	12.6505	0.807421	0.0483828	0.12169	0.957212	3.45453	3.29812	0.197187	5.37319	23.8043	6.75265		4.64	909	2.55	462	0.8	2.68	23.5	14.6	113.4	70.9	24.7	109.2	8.99	2.33	4.91	1090	26.9	57.5	5.8	20.1	3.12	0.48	3.42	0.548	3.57	0.98	2.05	0.494	2.65	0.49	4.09	0.96	1.37	13.3	12.03
Okareka-P_5	78.2252	0.137543	12.6575	0.879499	0.0506072	0.131831	0.92909	3.70734	3.28144	0.190373	4.77091	23.8387	6.98877		5.4	920	3.3	504	0.72	7.9	23	17.5	120	74	26	112	9	2.11	5.5	1090	28.8	56	5.9	19.4	4.05	0.37	4.3	0.62	3.7	0.91	2.03	0.32	3.4	0.54	3.6	0.96	1.76	14.9	11.4
Okareka-P_6	78.5801	0.161687	12.4853	0.85944	0.0926042	0.122154	0.919395	3.49224	3.28704	0.214322	5.02394	23.9061	6.77927		5.08	1110	3.12	496	0.89	3.64	33	16.5	126	74.1	22.8	104	9.41	2.01	5.91	1190	26.6	55.7	6.15	20.1	4.1	0.54	3.55	0.63	3.88	0.55	1.79	0.41	4.2	0.47	2.9	1.12	1.55	13.8	11.3
Okareka-P_7	78.7849	0.154415	12.4831	0.887881	0.0434261	0.137676	0.904525	3.37047	3.23358	0.20455	5.66988	24.3646	6.60405		3.89	707	2.2	385	0.92	Below LOD	Below LOD	12.1	95	54.7	18.7	92	7.3	2.3	4.42	830	21	48.5	5.04	17.5	2.49	0.59	2.99	0.53	3.07	0.74	1.51	0.37	2.92	0.44	2.49	0.59	1.56	10	8.7
Okareka-P_8	78.5781	0.148198	12.5775	0.96064	0.0493365	0.117271	0.898094	3.46395	3.20688	0.202597	4.76036	24.5029	6.67084		4.58	950	3.4	465	1.05	2.78	23	14.8	121	68.7	21.3	98	9.4	2.28	4.75	1130	25.6	50.7	5.03	21.1	3.9	0.8	3.52	0.496	3.54	0.75	1.88	0.47	2.48	0.47	2.84	1.02	1.83	13.2	10.6
Okareka-P_9	78.5511	0.136487	12.5915	0.796156	0.0703063	0.13533	0.919769	3.44976	3.34958	0.167922	4.03433	23.451	6.79934		5.5	1000	2.73	520	0.7	3.9	11.4	17	126	80	27.9	119	9.3	2.1	4.8	1140	30.3	60	6	20.8	4.5	0.65	4.1	0.59	4	0.73	2.46	0.31	3.2	0.44	3.1	0.74	1.3	14.7	12.8
Okareka-P_11	78.5849	0.153826	12.5397	0.906964	0.0763419	0.0905197	0.902185	3.5327	3.21284	0.207129	5.30869	24.4596	6.74554		4.77	844	2.62	404	0.84	3.88	26	14.7	111	63.7	21.1	100	8.15	2.05	4.41	960	24.2	49.3	5.6	18.7	3.7	0.66	3.3	0.413	3.51	0.68	1.67	0.44	2.8	0.42	2.99	0.72	1.17	12.9	9.99
Okareka-P_14	78.6246	0.145578	12.5106	0.792451	0.06162	0.115315	0.908019	3.71263	3.12919	0.224797	6.1485	25.1262	6.84182		4.19	816	2.03	424	0.74	2.65	32.9	13.9	100	63.3	20.8	90	8.1	2.05	4.49	960	23.7	46.8	4.66	18.3	3.41	0.51	3.16	0.52	2.91	0.78	3.27	0.28	2.41	0.29	2.8	0.72	Below LOD	12.2	9.63
Okareka-P_15	78.6288	0.134592	12.5022	0.924287	0.067358	0.102289	0.894499	3.53052	3.21545	0.200181	5.1999	24.4534	6.74597		5.3	880	2.75	475	1.03	2.63	26.9	14.8	107	67	21.9	101	8.6	1.53	4.45	1000	24	52	5.66	18.8	3.9	0.48	2.65	0.42	3.05	0.65	2	0.31	2.71	0.289	2.6	0.81	1.13	12.9	11.5
Okareka-P_16	77.9183	0.135792	12.6669	0.748984	0.0674498	0.080784	0.902008	3.6252	3.85457	0.148381	3.54272	20.2145	7.47977		3.94	711	2	409	0.6	2.25	19.8	13	119	57.4	19.6	69.8	8.02	1.4	6.18	1000	26.2	50.9	6.42	19.3	3.13	0.46	3.4	0.56	2.67	0.62	3.8	0.43	2.24	0.42	2.72	0.95	1.51	15.5	12.8
Okareka-P_17	78.2934	0.146521	12.453	0.89974	0.0365635	0.144966	0.939077	3.78639	3.30031	0.201919	4.44092	23.7231	7.08669		5.5	920	1.84	520	0.76	22.4	35	17.4	119	77	25.8	111	8.8	2.8	5.1	1140	28.6	56	6.8	21.5	4.7	0.46	4.6	0.71	4.1	0.92	3.2	0.27	2.5	0.49	3.7	0.67	1.66	15.5	11.5
Okareka-P_18	78.5462	0.13595	12.5347	0.994789	0.0737809	0.124013	0.903058	3.61562	3.07196	0.19587	3.65486	25.5688	6.68758		5.9	846	2.73	416	0.54	2.06	27.5	14.5	108	68	20.8	95.6	8.4	1.74	4.7	939	23.3	48.1	6.13	18.4	2.91	0.59	4.4	0.53	2.7	0.65	5	0.47	2.43	0.32	2.94	0.76	1.7	12.3	9.48
Okareka-P_19	78.5246	0.131833	12.4914	0.970887	0.0213514	0.133578	0.909177	3.58236	3.23471	0.207774	4.07213	24.2756	6.81707		4.9	740	2.25	385	0.6	7.4	15.4	12.4	100	56	17.1	84	6.9	1.27	4.1	780	19.5	39.6	4.99	14.5	3.3	0.46	3	0.35	2.9	0.57	2.9	0.32	2.25	0.29	2.58	0.48	0.45	11.3	8.2
Okareka-P_20	78.4895	0.154978	12.6281	0.866907	0.0623298	0.133459	0.880872	3.64224	3.14161	0.193643	5.28416	24.9838	6.78386		6.3	970	3.18	452	0.9	Below LOD	25.9	15	123	70	23.2	109	8.7	2.53	5.15	1100	25.7	52.9	6.56	19.9	4	0.71	3.99	0.54	2.63	0.77	4.11	0.32	3.13	0.39	3.06	0.95	0.91	12.2	10.6
Okareka-P_21	78.565	0.0993533	12.8004	0.882764	0.0447038	0.114731	0.926814	3.68913	2.87702	0.188817	5.67088	27.3077	6.56616		6.3	850	2.68	411	0.48	5.3	13	13.1	105	66	20.7	99	7.8	1.6	3.72	930	23.5	45	5.7	19.9	3.3	0.44	3.42	0.55	3.5	0.7	4.7	0.45	2.53	0.484	2.74	0.78	1.8	11.6	9.3
Okareka-P_22	78.8367	0.105716	12.3955	0.827137	0.0874521	0.120224	0.934053	3.47608	3.21711	0.213016	4.93941	24.5054	6.69319		6.8	910	3.2	464	0.83	13.1	21.7	16.4	123	83	26	111	10	1.69	4.65	1130	31.2	51.8	6.5	22.1	4.36	0.34	3.45	0.62	3.6	0.83	4.21	0.43	3.49	0.43	3.4	0.82	1.41	13.7	11.7
Okareka-P_23	78.4528	0.115027	12.8193	0.811788	0.0831025	0.1323	0.92772	3.47823	3.17975	0.204752	5.76302	24.6726	6.65798		5.73	864	2.85	442	0.85	2.39	33.2	15.1	111	71.9	23	93.9	8.99	1.66	4.2	1091	26.1	50.9	6.22	20.1	4.02	0.57	3.8	0.505	2.67	0.77	3.69	0.29	3.66	0.49	3.52	0.83	1.51	13.7	10.52
Okareka-P_24	78.2928	0.131077	12.6256	0.908366	0.0762881	0.118781	0.913747	3.74261	3.19062	0.20922	5.24193	24.5384	6.93323		6.86	930	3.7	505	1.25	Below LOD	Below LOD	17.1	130	71.6	23.6	109	8.3	2.05	5.4	1040	26.3	56.3	6.5	19.5	3.89	0.77	4.6	0.39	3.55	0.68	3.9	0.36	2.8	0.42	2.92	0.66	1.17	14.2	11
Okareka-P_25	78.3492	0.145195	12.714	0.858304	0.033017	0.123195	0.92479	3.60898	3.24329	0.196668	5.12359	24.1574	6.85226		6.7	1030	3.23	526	0.65	Below LOD	Below LOD	16.4	135	77	23.7	112	9.6	1.63	5.47	1180	28.3	55.2	6.56	23.1	4	0.55	3.51	0.74	3.18	0.93	4.3	0.3	3.17	0.55	3.41	0.92	1.97	14.7	11.9
Average	78.4787	0.138001	12.5968	0.874671	0.0614247	0.122768	0.914617	3.57482	3.23822	0.196506	4.92784	24.3068	6.81304		5.21091	885.455	2.71955	453.5	0.798636	5.11056	24.8684	14.8727	113.345	68.7409	22.4091	99.9818	8.57727	1.91682	4.78364	1035.64	25.6409	51.1136	5.78591	19.4818	3.72318	0.551364	3.63591	0.535091	3.32864	0.745455	2.93182	0.366318	2.84682	0.413818	3.07227	0.81	1.36952	13.2227	10.6841
Standard Deviation	0.20047	0.0164559	0.110905	0.0622518	0.0206046	0.0161258	0.0172415	0.109209	0.183791	0.018604	0.728775	1.32915	0.206697		0.971827	99.9965	0.493679	44.3243	0.180008	5.17126	7.59086	1.64843	11.6933	7.36405	2.60492	11.4019	0.752502	0.389204	0.636984	108.184	2.80674	4.95333	0.693491	1.81019	0.545461	0.120289	0.593181	0.0960466	0.449426	0.122619	1.12165	0.0716814	0.522197	0.0836311	0.439674	0.157147	0.377723	1.38836	1.24064
Te Rere-P_1	78.2231	0.0777661	12.4958	0.979947	0.0792061	0.0352354	0.544964	3.70905	3.85486	0.231218	4.16951	20.2921	7.56391		4.4	580	Below LOD	285	0.34	1.74	25.9	14.2	111	39	26.3	90	8.5	2.07	5.8	610	22.1	50	6.3	21.5	4.2	0.5	4	0.8	4.6	1.21	3.1	0.35	3.2	0.42	2.6	0.94	1.57	15.6	10.6
Te Rere-P_2	77.9544	0.0808154	12.409	1.07291	0.050507	0.0451476	0.551161	3.88806	3.94804	0.20379	2.19662	19.7451	7.8361		4.8	560	0.53	280	0.47	1.84	45	12.8	114	24.2	28.8	99	9.1	1.74	5.9	660	28.3	56	6.4	24.4	5.2	0.55	5.8	0.93	5.4	1.31	2.49	0.44	2.89	0.51	3.8	0.8	1.64	16.9	12.8
Te Rere-P_3	78.0604	0.0975173	12.343	1.05087	0.00604958	0.0512983	0.63525	3.776	3.97959	0.224644	0.421193	19.6152	7.75559		4.11	602	Below LOD	316	0.45	1.83	45.3	13.7	117	30.8	36.1	109	10.7	2.04	6.77	776	29.1	59.6	6.54	27.7	5.7	0.7	6.6	0.96	6.11	1.24	3.04	0.62	4.72	0.55	3.78	0.88	1.77	20.3	13.3
Te Rere-P_5	77.9244	0.136029	12.4694	1.24245	0.0550551	0.0944127	1.00071	3.57997	3.4975	0.183873	3.71092	22.2801	7.07747		3.11	633	1.04	306	0.82	3.17	34	13.8	98.9	66.7	22.9	110.7	6.65	1.84	6.29	631	22	44.2	4.13	16.2	3.32	0.57	3.47	0.61	3.9	0.69	1.81	0.356	2.69	0.355	2.98	0.51	1.41	15.1	11.8
Te Rere-P_6	78.1204	0.0905185	12.3019	1.04516	0.0664805	0.0585906	0.677177	3.73467	3.90505	0.250554	3.94862	20.005	7.63972		5.15	806	Below LOD	416	0.68	2	37.7	19.5	138	38.6	43.1	135.9	12.9	2.63	8.14	913	34.5	71.4	8.19	34	6.9	0.5	6.3	1.02	6.1	1.33	3.71	0.8	5.1	0.53	4.4	0.98	2.04	21.6	14.8
Te Rere-P_7	78.2779	0.107407	12.4117	1.08044	0.052209	0.0521594	0.639701	3.43622	3.94224	0.236429	5.38493	19.8562	7.37846		5.3	760	0.51	392	0.57	3.21	40.1	19.1	145	35.3	45.4	145	13	2.09	9	910	36	79	8.3	34.7	6.5	0.72	8.7	1.21	6.9	1.38	3.77	0.89	4.4	0.77	5.64	0.99	2.06	21.2	15.5
Te Rere-P_8	77.9487	0.0958336	12.4156	1.14106	0.0972065	0.0898123	0.633091	3.56084	4.01778	0.193291	4.56292	19.401	7.57861		4.27	630	Below LOD	325	0.7	3.7	38	16.1	112	31.9	35.7	110	10.6	2.05	6.1	720	27.7	58	6.9	29.2	6.1	0.514	5.1	0.85	5.5	1.07	2.38	0.6	3.6	0.6	3.99	0.66	1.57	18.2	12
Te Rere-P_9	77.8487	0.0591292	12.4922	1.08441	0.0705145	0.0560067	0.613916	3.69787	4.07717	0.181793	2.60912	19.0938	7.77504		4.77	672	Below LOD	340	0.62	2.32	46	15.6	122	30.2	39.1	124	10.8	2.55	7.75	775	29.9	68.8	7.37	29.1	7.6	0.67	5.9	0.9	4.9	1.33	2.88	0.61	5.22	0.49	4.7	0.82	1.72	19.2	14.4
Te Rere-P_10	78.1928	0.0980164	12.4047	1.04042	0.0112056	0.0527885	0.620041	3.84171	3.73833	0.221309	3.23227	20.9165	7.58004		3.88	573	Below LOD	325	0.57	9.1	29.1	16.5	107	30.8	37.5	109	10.1	2.18	6.6	740	29.6	59.2	6	26.3	5.6	0.58	4.8	0.92	6.1	1.16	2.41	0.52	4.8	0.56	3.93	0.61	1.43	18.3	12.7
Te Rere-P_11	78.0532	0.111333	12.3146	1.0349	0.105039	0.0557135	0.616189	3.38632	4.32265	0.228872	3.6505	18.0568	7.70897		5	1210	6.6	480	3.6	Below LOD	75	18.2	123	30.7	36.3	121	13.1	2.51	7.7	770	30.3	68	7	30.3	5.7	0.51	5.8	0.93	6.2	1.17	3.36	0.74	4.5	0.69	5.1	0.75	1.56	19.6	12.9
Te Rere-P_12	78.2971	0.119134	12.4196	1.04387	0.0889825	0.0429339	0.644133	3.47702	3.86714	0.21141	5.22026	20.2468	7.34416		5.58	670	1.2	390	0.51	4.6	40.8	18.9	138	32.6	41.9	124	12.1	2.01	7.1	770	33.3	65	7.4	29.8	6.5	0.82	6	0.92	6.2	1.25	5.2	0.61	4.1	0.72	3.08	1.24	1.41	20.7	13.9
Te Rere-P_13	78.3768	0.0811097	12.3335	0.937369	0.0413913	0.0333498	0.595097	3.54526	4.05611	0.198667	3.94355	19.3232	7.60137		5.41	620	Below LOD	333	0.5	2.67	41.1	16.1	149	28.4	35.7	116	11.2	2.9	7.3	790	29.4	65.6	8	29.4	6.3	0.47	6.5	0.96	5.8	1.28	5.3	0.71	4.18	0.59	3.8	1.47	1.96	19.3	13.1
Te Rere-P_14	77.929	0.104365	12.4205	1.00137	0.0412905	0.0800243	0.641662	3.85336	3.9284	0.241122	3.70889	19.8373	7.78176		8.7	920	1.14	520	1.05	4.9	49	23.9	214	43.6	50.6	169	15.2	2.57	10.1	1060	41.2	91	12	38.5	8	0.76	6.3	1.34	8.5	1.83	8.6	0.95	6.7	0.89	6.5	2.46	1.98	27.3	17.6
Te Rere-P_15	77.8015	0.0695528	12.3264	1.08721	0.113795	0.061331	0.611662	3.61901	4.30947	0.223124	2.59377	18.0536	7.92848		7.02	680	Below LOD	362	0.53	2.45	48.4	18.2	165	31.6	39	131	11.8	2.4	7.69	830	31.7	72	8.6	31.1	5.9	0.64	6.2	1.06	6.8	1.22	6.5	0.61	4.7	0.66	3.81	1.55	2.16	20.5	15
Te Rere-P_16	78.0839	0.0948695	12.4339	1.06651	0.0379603	0.0754714	0.61138	3.6296	3.96645	0.207099	4.78321	19.6861	7.59605		8.4	770	Below LOD	424	0.55	3.62	41	20.5	183	35.4	47.5	152	13	2.57	9	950	38.2	86	10.3	34.2	7.4	0.74	6.2	1.2	7.2	1.52	7.8	0.76	5.2	0.93	5.8	1.89	1.91	22.8	18
Te Rere-P_17	78.2941	0.0946058	12.3226	1.05141	0.0486037	0.0385096	0.610849	3.62343	3.91586	0.207264	3.32427	19.9941	7.53929		7.2	650	Below LOD	381	0.44	1.67	51	17.6	148	30.6	39.4	129	11.5	2.66	7.4	800	33.7	70	8.2	29.6	6.72	0.49	6.3	0.94	6.3	1.19	6.3	0.8	4.3	0.62	5.63	1.67	1.57	21.1	15.8
Te Rere-P_18	77.8878	0.0714283	12.2318	1.13998	0.0876476	0.0611592	0.615969	3.23613	4.66805	0.207903	5.15141	16.6853	7.90418		6.95	605	0.68	315	0.64	1.69	41.9	14.3	133	27.3	31.6	106	9.4	2.14	6.2	650	25.5	58.5	7.8	26	4.6	0.56	4.8	0.89	4.7	1.11	5	0.55	3.63	0.53	3.42	1.46	1.69	15.9	11.8
Te Rere-P_19	77.9173	0.0875004	12.4892	0.987285	0.0609981	0.0527799	0.584112	3.68718	4.1336	0.25304	3.21646	18.8497	7.82078		7.7	650	Below LOD	371	0.51	2.83	37.7	18.3	155	29.1	37.4	122	10.3	2.65	7.3	740	29.2	67	8	29.3	6.5	0.55	5.6	0.93	7.2	1.22	5.7	0.6	4.2	0.67	3.8	1.8	1.82	20.7	14.7
Te Rere-P_20	78.3995	0.089554	12.3657	1.00125	0.0522372	0.044863	0.600043	3.38463	4.06224	0.252252	5.43593	19.2996	7.44687		7.13	633	0.8	389	0.69	Below LOD	22.5	18.2	150	33.6	42.8	129	10.9	2.36	7.5	810	34.1	68.8	7.7	27.6	6.7	0.49	6	1	7.3	1.29	5.5	0.68	4.22	0.66	4.34	1.85	1.83	20.6	14.9
Te Rere-P_21	78.1755	0.0834137	12.4953	1.10843	0.0623028	0.043858	0.659814	3.43295	3.93844	0.217055	5.24312	19.8493	7.37139		8.4	740	Below LOD	390	0.67	Below LOD	41.4	18.3	161	34	41.5	132	11.4	2.4	8.5	800	31.7	72	9.1	29.9	6.3	0.79	6.93	1.07	7	1.38	5.4	0.62	4.5	0.69	5.3	1.74	1.68	19.5	15
Te Rere-P_22	78.0251	0.0952545	12.7042	0.819853	0.0954408	0.0997602	0.822662	3.79624	3.54141	0.146152	2.79726	22.0322	7.33765
Te Rere-P_23	78.1498	0.101561	12.4688	1.01554	0.0352823	0.0661025	0.617631	3.66922	3.87606	0.200694	4.38573	20.1622	7.54528
Te Rere-P_24	78.1618	0.101017	12.207	1.16303	0.0927473	0.0360268	0.573881	3.59794	4.06652	0.23381	3.87146	19.2208	7.66446
Te Rere-P_25	78.3601	0.0902628	12.3739	1.06329	0.0825532	0.0620205	0.611992	3.63852	3.71735	0.217927	3.67654	21.0796	7.35587
Average	78.1026	0.0932497	12.4021	1.05246	0.0639461	0.0578898	0.638879	3.61672	3.9721	0.215554	3.8016	19.7326	7.58881		5.864	698.2	1.5625	367	0.7455	3.13765	41.545	17.19	139.195	34.22	37.93	123.18	11.1125	2.318	7.407	785.25	30.875	66.505	7.7115	28.94	6.087	0.6062	5.865	0.972	6.1355	1.259	4.5125	0.6408	4.3425	0.62175	4.32	1.2535	1.739	19.72	14.03
Standard Deviation	0.177249	0.0164713	0.102688	0.0820253	0.0282475	0.0184992	0.0930924	0.164564	0.243247	0.0249517	1.17952	1.19387	0.209344		1.6804	149.717	2.05264	61.9694	0.689275	1.83192	10.8137	2.7067	28.2389	8.81462	6.8539	18.5615	1.90082	0.313463	1.1423	111.232	4.79966	11.1605	1.63863	4.83468	1.13554	0.113399	1.10242	0.156259	1.10083	0.21121	1.90399	0.158054	0.903111	0.141823	1.04747	0.535638	0.225783	2.75215	1.91149
Kawakawa-P_1	78.0251	0.135879	12.4461	1.15067	0.0832089	0.0788209	0.965414	3.51063	3.60421	0.184158	4.43562	21.6483	7.11484		3.66	694	1.23	351	1	Below LOD	22.5	12.64	100.1	80.3	21	114.2	6.42	1.76	5.91	586	21.3	38.9	4.45	16.3	4.05	0.55	2.85	0.444	3.37	0.7	1.98	0.333	2.19	0.38	3.53	0.442	1.35	12.3	9.6
Kawakawa-P_2	78.0964	0.148707	12.7617	1.20694	0.0486257	0.097473	1.22875	3.47187	2.93945	0.209436	5.84583	26.5684	6.41132		3.3	754	1.56	311	0.69	Below LOD	22.3	14.1	133	63.6	21.5	113	7.66	2.21	6.93	706	23.3	47.3	5.58	19.8	3.25	0.46	3	0.58	3.95	0.76	2.25	0.42	3.11	0.37	3.2	0.51	1.68	16.4	11.2
Kawakawa-P_3	77.4612	0.228858	12.9581	1.41012	0.0524189	0.13322	1.27674	3.31644	3.16288	0.156378	5.76384	24.4907	6.47932		3.34	1195	4.38	321	1.52	Below LOD	33.2	13.9	114.2	91.6	19.8	164.8	6.22	1.93	6.73	598	20.7	41.6	4.29	14.1	3.05	0.493	2.6	0.478	3.1	0.78	1.93	0.298	2.34	0.413	5.09	0.52	1.22	14.82	11.44
Kawakawa-P_4	78.1129	0.133823	12.7297	1.16772	0.0344231	0.123685	1.202	3.55765	2.93814	0.159306	5.4991	26.5858	6.49578		3.06	700	1.62	290	0.67	Below LOD	33.4	11.9	95	109.5	17.5	97	5.9	1.5	5.26	543	17.6	34.7	3.89	14.5	2.97	0.66	2.64	0.5	3.1	0.6	1.84	0.313	1.78	0.282	3.34	0.374	1.39	11.3	8.8
Kawakawa-P_5	78.4229	0.170407	12.3179	1.14333	0.0429316	0.0889242	0.920656	3.34881	3.54408	0.185554	4.58339	22.1279	6.89289		3.14	802	1.57	305	0.92	1.65	23.2	12	110	56.9	19	121	6.33	1.79	6.07	552	18	38.1	4.55	16.7	2.76	0.59	3.21	0.52	2.89	0.64	1.99	0.389	2.24	0.31	3.37	0.48	1.16	12.4	9.3
Kawakawa-P_6	78.0406	0.11813	12.6782	1.32243	0.0239489	0.136774	1.18397	3.55161	2.94437	0.176354	4.41485	26.505	6.49598		3.88	876	2.03	386	1.06	2.49	36.7	14.7	119.6	95	23.3	140	7.5	2.4	7.6	600	22.4	44	5.2	18.7	3.51	0.65	3.42	0.55	3.07	0.8	2.45	0.33	2.02	0.386	4.01	0.57	1.15	13.5	11.3
Kawakawa-P_7	78.1163	0.145478	12.6414	1.12347	0	0.115176	1.16341	3.45381	3.2409	0.161023	4.53183	24.1032	6.69471		3.94	990	3.02	480	1.39	23	50	18.3	132	99	23.2	129	8.8	2.7	7.8	700	24.9	48	4.92	20.9	3	0.51	2.62	0.66	4	0.66	2.16	0.45	1.94	0.51	3.5	0.398	2.5	18.9	11.3
Kawakawa-P_8	78.0436	0.131515	12.4416	1.00375	0.00626466	0.117049	0.925559	3.1837	4.14695	0.168685	3.84003	18.8195	7.33066		4.17	1100	14.4	285	1.84	6.01	13.4	17.2	149	62	19.3	133	6.7	1.57	12	660	21.8	41.6	4.29	14.3	3.8	0.39	2.95	0.57	2.4	0.77	1.66	0.224	2.6	0.31	3.8	0.43	2.21	14.1	14.1
Kawakawa-P_9	77.9575	0.149268	12.6735	1.10601	0.0846921	0.112638	1.24688	3.66034	3.00915	0.183531	4.68666	25.9068	6.66949		4.23	1060	1.3	453	0.77	2.1	43.6	18.3	145	105	24	151	9.1	2.15	8.6	766	25.9	51.1	5.73	21.5	4.56	0.81	4.7	0.51	4.08	0.91	3.32	0.39	2.68	0.31	5.1	0.56	1.66	15.5	12.6
Kawakawa-P_10	77.9908	0.128407	12.6794	1.19657	0.0596258	0.127632	1.19717	3.46726	3.15312	0.159635	5.03022	24.7345	6.62039		4.64	996	2.93	477	1.65	3.96	27.2	16.7	132	103	25.9	146	8.37	1.79	8.26	708	25	49.4	5.78	22.2	5	0.56	4.5	0.78	4.09	0.75	3.47	0.41	3.09	0.43	4.42	0.48	1.77	14.2	12.1
Kawakawa-P_11	75.6101	0.295824	13.7468	1.69121	0.0438402	0.276337	1.87026	3.75798	2.70764	0.147695	3.81287	27.9247	6.46562		7.13	1520	8.37	465	2.82	2.91	29	17.2	100.6	126.8	24.8	253	7.73	1.62	6.18	545	21.9	43.9	5.19	17.5	4.08	0.85	3.97	0.7	3.44	0.81	2.44	0.4	2.48	0.41	6.2	0.66	1.46	15.9	9.74
Kawakawa-P_12	78.1857	0.157276	12.5921	1.16782	0.0378533	0.112435	1.194	3.42717	3.12566	0.183199	4.51411	25.0142	6.55282		6.3	980	2.01	505	1.44	28	31.6	17.6	150	105	23.6	142	8.7	1.42	9	760	26	50.9	5.9	21.5	3.37	0.73	2.75	0.7	3.9	0.6	2.16	0.45	2.9	0.34	3.9	0.91	1.88	18.1	10.9
Kawakawa-P_13	78.1495	0.135381	12.4613	1.22375	0.065778	0.147368	1.24073	3.41207	3.16409	0.14981	6.58607	24.6989	6.57616		5.4	853	2.66	369	1.02	2.35	15.9	14.7	119.7	96.5	21.6	129	7.1	1.41	7.44	598	21	41.1	4.61	18	3.7	0.65	3.96	0.516	3.45	0.7	1.93	0.422	2.46	0.369	3.38	0.85	1.63	13.2	10.5
Kawakawa-P_14	78.0308	0.142026	12.5716	1.24993	0.0858751	0.12796	1.21266	3.50912	3.06995	0.1678	4.59663	25.4177	6.57907		5.39	838	1.97	378	0.85	2.3	30	13.6	116	90.8	23.3	134	7.31	1.35	7.14	636	21.3	46.1	4.72	19.1	3.17	0.67	4.04	0.62	3.48	0.7	1.92	0.367	2.95	0.414	4.09	0.67	1.18	13.5	10.7
Kawakawa-P_15	77.955	0.1272	12.65	1.15234	0.0926579	0.118165	1.19738	3.36125	3.34602	0.237712	7.67956	23.2979	6.70726		5.42	1030	3	443	1.06	2.45	46.4	14.6	131	104	26.5	144	8.9	2.09	7.6	726	25.2	49.9	5.9	20.3	3.7	0.73	4.2	0.67	4.25	0.82	2.07	0.46	3.03	0.35	4.8	0.86	1.79	14.9	12.1
Kawakawa-P_16	76.929	0.242256	13.2303	1.33024	0.0409491	0.17656	1.42632	3.37403	3.25029	0.15314	5.84842	23.6684	6.62432		6.61	1070	2.02	542	1.33	1.96	41.7	19.8	140	114.6	29.5	166	9.2	2.16	8.9	780	28.3	58.4	5.85	21.8	5.38	1.02	4.22	0.86	4.74	0.89	2.2	0.461	2.61	0.75	4.39	0.63	1.65	17.8	13.8
Kawakawa-P_18	76.6575	0.267357	13.1664	1.47677	0.0418403	0.215936	1.57797	3.45123	3.14498	0.161773	4.97433	24.3745	6.59621		4.58	1373	6.86	400	1.93	5.5	30	15.5	103.3	107.7	20.6	175	7.09	1.71	6.88	621	21.1	41.1	4.13	15	3.1	0.36	3.3	0.44	3.07	0.56	1.81	0.27	1.71	0.339	4.7	0.6	1.77	15.8	11.5
Kawakawa-P_19	78.0468	0.124786	12.6309	1.21744	0.105251	0.143069	1.26081	3.5087	2.96218	0.186347	4.98941	26.3478	6.47088		4.55	817	1.27	495	1.3	4.58	23.9	16.9	115	93.3	25.6	131.4	6.66	1.55	6.86	608	22.6	44.3	4.7	18.9	3.16	0.47	3.97	0.53	3.74	0.73	1.95	0.346	2.24	0.35	3.26	0.531	1.44	17.1	10.8
Kawakawa-P_20	77.9846	0.124509	12.694	1.31325	0.0582023	0.100926	1.18517	3.48972	3.04965	0.173686	4.77753	25.5717	6.53937
Kawakawa-P_21	77.9234	0.16617	12.5981	1.21487	0.0519256	0.0955615	1.25589	3.53686	3.15718	0.176081	4.8685	24.6814	6.69404		5.9	990	1.64	482	1.06	3.08	22.6	17.4	129	110	28.7	150	8.2	1.83	8	740	28.4	52.8	5.2	21.9	4.7	0.94	4.4	0.7	4.14	0.75	2.84	0.47	3.5	0.37	4.7	0.74	1.6	17.5	12.8
Kawakawa-P_22	77.9855	0.169576	12.7312	1.22845	0.0700828	0.124533	0.964631	3.27908	3.44701	0.140157	5.4474	22.6241	6.72609		7.6	1040	1.4	344	0.64	Below LOD	43.7	15.4	141	77.4	27.7	169	8.1	1.75	7.6	703	24.9	53.5	5.7	22.8	4.6	0.62	4.8	0.66	4.81	0.93	4.1	0.47	2.78	0.32	5.01	0.92	1.57	17.4	14
Kawakawa-P_23	78.1776	0.129084	12.7252	1.31448	0.0433612	0.102645	1.18347	3.39452	2.92958	0.154867	5.52871	26.6856	6.3241		7.2	1000	2.6	440	1.05	Below LOD	45	15.3	122	94	22	130	6.4	0.79	6.1	580	20.4	43	5.2	17.1	2.9	0.45	3.52	0.53	3.3	1	3.9	0.24	2.3	0.34	3.3	0.6	0.89	13.8	8.3
Kawakawa-P_24	76.928	0.250796	12.9498	1.48739	0.0735594	0.198684	1.47999	3.41773	3.21402	0.156241	5.00265	23.9352	6.63174
Kawakawa-P_25	77.7605	0.123975	12.699	1.34302	0.0516538	0.13037	1.24492	3.62033	3.02618	0.160747	4.36792	25.6959	6.64651
Average	77.7746	0.164445	12.7406	1.26008	0.0541238	0.133414	1.23353	3.46091	3.17824	0.170555	5.06773	24.6428	6.63915		4.92571	984.667	3.23048	405.81	1.23857	6.156	31.681	15.6067	123.69	94.5714	23.2571	144.4	7.54238	1.78476	7.46952	653.143	22.9524	45.7	5.03714	18.7095	3.70524	0.62681	3.60095	0.596095	3.63667	0.755238	2.39857	0.37681	2.52143	0.383476	4.14714	0.606429	1.56905	15.1629	11.28
Standard Deviation	0.634485	0.0517258	0.300387	0.148028	0.0257084	0.0443774	0.206444	0.124345	0.291113	0.0213019	0.862415	1.97865	0.217871		1.42187	205.464	3.14767	78.9719	0.517458	8.01573	10.3691	2.17705	16.4851	17.94	3.26214	31.7034	1.04502	0.415724	1.44458	77.4004	2.94561	5.84979	0.642901	2.82399	0.761161	0.17545	0.730472	0.112284	0.61333	0.114264	0.708663	0.0764445	0.472877	0.0985224	0.811654	0.166288	0.368875	2.12833	1.62242
Poihipi-K8_1	77.809	0.125606	12.7008	1.23214	0.0922997	0.102672	1.0895	3.531	3.31696	0.216955	4.71064	23.4579	6.84796
Poihipi-K8_4	78.2618	0.131661	12.4721	0.931324	0.100519	0.105306	0.929492	3.6486	3.4192	0.132144	0.516251	22.889	7.06779		4.01	950	1.54	441	0.56	0.72	43.9	14.1	107	84	26.9	109	8.7	2.04	6.1	930	26.2	51.6	5.67	20.8	4.5	0.7	3.58	0.67	4.8	0.86	2.4	0.349	2.74	0.49	3.9	0.69	1.37	18.7	11.2
Poihipi-K8_6	77.9136	0.105992	12.5519	0.827033	0.0360413	0.0616237	0.806434	3.50276	4.19453	0.170602	3.05643	18.575	7.69729		3.06	568	Below LOD	442	0.39	2.42	30.5	13.6	147	56.3	21.2	80	9.1	1.8	8	890	28.2	53	5.39	18.4	2.8	0.41	2.8	0.43	2.74	0.68	2.61	0.295	2.61	0.32	2.75	0.85	1.97	17.9	15.7
Poihipi-K8_7	78.2117	0.153088	12.4829	0.915919	0.0750191	0.12434	0.922326	3.70053	3.41413	0.126702	0.426917	22.9082	7.11466		4.44	910	2.34	515	1.48	4.5	22.5	17.9	119	86	27.9	120	8.5	2.29	5.6	900	27.2	55.4	6.1	21	4.4	0.76	4.3	0.64	4.62	0.93	2.17	0.42	3.67	0.3	3.86	0.95	1.6	17.4	11.5
Poihipi-K8_9	78.293	0.141428	12.4897	0.935172	0.0591554	0.118854	0.956044	3.6291	3.37751	0.134915	0.201679	23.1807	7.00661		3.86	681	1.01	496	0.49	1.88	39.3	15.4	182	69	26.2	103	11.3	2.3	10.1	1110	34.4	64.6	6.8	27.1	4.7	0.59	4.1	0.74	3.42	0.81	2.47	0.39	4.8	0.4	3.9	1.4	3.2	21.9	18.7
Poihipi-K8_11	77.8649	0.0959862	12.6123	0.862764	0.0915747	0.0684046	0.800774	3.5166	4.08661	0.15374	0.00918464	19.0537	7.60321
Poihipi-K8_12	78.0736	0.102587	12.4826	0.928602	0.0360728	0.0875999	0.799544	3.43716	4.05229	0.14886	3.14091	19.2665	7.48945		2.91	697	1.69	351	0.53	2.34	21.9	12.9	128	49.2	19.9	83	8.14	1.71	6.67	782	23.5	48.7	5.1	15.7	4.3	0.51	2.43	0.35	2.46	0.6	2.18	0.38	1.96	0.3	3.05	0.7	1.18	16.4	13.7
Poihipi-K8_13	77.5073	0.14677	12.5411	1.37877	0.0517812	0.0844048	1.00566	3.47962	3.80457	0.168923	4.60316	20.3721	7.28419		6.82	896	0.53	420	0.57	0.61	57.4	17.3	142	72.1	32.4	158	10.9	2.36	6.91	871	31.4	62	7.39	26.8	6.5	1.05	5.81	0.78	5.44	1.15	3.35	0.62	3.45	0.67	4.86	0.81	1.52	24.8	13.5
Poihipi-K8_15	77.8905	0.144349	12.5442	1.00731	0.0979064	0.0943813	0.923664	3.81237	3.48534	0.133431	0.907833	22.348	7.29771		4.61	928	1.89	454	0.83	0.9	42.5	15.2	130	89	30.1	130	9.6	2.12	6.38	960	28.2	56.9	6.59	23.9	5	0.8	4.23	0.548	4.29	1.06	2.57	0.4	3.6	0.5	4.7	0.94	1.77	17.1	13.2
Poihipi-K8_16	78.1832	0.12978	12.5634	0.832246	0.0686369	0.12028	0.954641	3.75714	3.39072	0.143045	0.0550196	23.058	7.14786		4.16	929	0.93	434	0.75	3.13	39.6	14.4	120	83.3	26.9	119	8.69	2.15	7	960	27.9	54.2	6.26	23.3	4.21	0.95	3.6	0.73	3.45	1.01	2.88	0.43	2.82	0.51	3.81	0.7	1.8	17.9	11.7
Poihipi-K8_17	78.2778	0.129924	12.3621	0.84102	0.0601145	0.117255	0.822816	3.9019	3.48698	0.152216	1.79379	22.4486	7.38888		3.88	760	1.47	476	0.47	1.93	29.9	15.2	113	66	25.2	84	8.7	1.97	4.9	900	25.3	48.7	6	24.9	4.9	0.61	3.9	0.7	4.7	0.87	2.12	0.47	2.5	0.46	3.3	0.74	1.32	19.1	10.4
Poihipi-K8_18	78.1383	0.159062	12.6136	1.31937	0.113573	0.105458	1.21313	3.4905	2.84704	0.185279	5.58618	27.4455	6.33753		5.28	1000	1.74	440	0.94	3.96	26.6	16.7	120	95	23.9	135	7.9	1.91	7	697	24.3	47	5.56	20	4.9	0.76	4	0.65	3.4	0.84	2.42	0.408	3.5	0.45	4.1	0.71	1.49	17	10.8
Poihipi-K8_19	77.7206	0.0849079	12.6772	0.871733	0.0289914	0.0546884	0.808067	3.52016	4.23364	0.148814	0.261389	18.3579	7.7538		3.68	660	1.3	484	0.29	Below LOD	33.1	15.2	173	64.3	23.7	87	10	2.3	9.1	990	30.7	59	5.94	23.3	4.9	0.33	3.2	0.51	3.43	0.57	2.52	0.31	4	0.38	3.5	1.08	1.94	21.6	18.2
Poihipi-K8_20	78.2484	0.109114	12.711	0.935596	0.0632752	0.0945786	0.877453	3.45778	3.50284	0.159242	4.79529	22.3386	6.96061		4.22	870	1.71	403	0.57	Below LOD	28.8	14.8	132	69.1	25.7	106	8.61	1.45	6.66	906	24.9	51.3	5.88	24	3.18	0.71	3.2	0.63	3.64	0.89	2.69	0.4	2.46	0.324	4.06	0.8	1.5	16.7	11.6
Poihipi-K8_21	78.4504	0.147039	12.3923	0.961648	0.0741898	0.0935178	0.884655	3.69008	3.30616	0.156251	0.937921	23.7285	6.99625		3.86	850	1.76	355	0.35	1.51	21.6	11.9	103	74	22.1	100	7.9	1.51	4.32	790	21.6	41.4	5.04	18.6	3.05	0.61	2.6	0.5	3.3	0.82	2.34	0.284	3.4	0.44	3.47	0.75	1.74	13.9	8.9
Poihipi-K8_22	77.9522	0.130823	12.687	1.05409	0.0642364	0.0914347	0.929783	3.82527	3.2652	0.159791	2.46867	23.8736	7.09047		4.26	930	1.49	434	0.66	1.97	23.6	14.3	121	74.7	21.7	108	9.5	1.79	6.4	830	24	53	6.2	21.2	3.6	0.79	3.7	0.62	3.6	0.75	2.45	0.45	3.17	0.43	4	0.79	1.36	17.7	11
Poihipi-K8_23	78.0416	0.0865216	12.4123	0.765452	0.0801728	0.061105	0.753262	3.56132	4.23827	0.160336	0.816606	18.4135	7.79959		2.98	539	0.94	430	0.4	2.22	30.4	13.7	141	56.7	19.6	76	8.2	2.07	7.1	840	26.8	49.8	4.84	18.6	4.2	0.4	3	0.49	3.6	0.71	2.29	0.31	2.52	0.43	2.65	0.74	2.17	17.3	14.8
Poihipi-K8_24	78.0098	0.0933727	12.6635	0.803754	0.0547967	0.0528019	0.808105	3.36613	4.14767	0.162189	3.25683	18.8081	7.5138		3.64	680	1.39	527	0.35	5.3	27.1	15.6	170	52.2	25.2	88	10.2	2.1	8.6	980	31	57.6	6.7	23.7	4.45	0.48	4.3	0.59	3.8	0.97	1.87	0.45	2.93	0.431	2.63	1.12	1.91	20.5	15.6
Poihipi-K8_25	78.264	0.0760299	12.241	0.84949	0.0932335	0.0556875	0.778291	3.53469	4.1076	0.187521	0.495978	19.0535	7.64229
Average	78.0585	0.120739	12.5369	0.960707	0.07061	0.0891786	0.898086	3.59804	3.66722	0.157945	2.00214	21.5567	7.26526		4.10438	803	1.44867	443.875	0.601875	2.385	32.4188	14.8875	134.25	71.3063	24.9125	105.375	9.12125	1.99188	6.9275	896	27.225	53.3875	5.96625	21.9563	4.34938	0.65375	3.67188	0.598625	3.79312	0.845	2.45812	0.397875	3.13313	0.427187	3.65875	0.860625	1.74	18.4937	13.1562
Standard Deviation	0.236034	0.02558	0.127982	0.172322	0.0236821	0.0239196	0.116101	0.148	0.418907	0.0218937	1.88149	2.52366	0.370347		0.949442	146.813	0.454955	49.4029	0.295685	1.40232	9.83221	1.55772	23.6291	13.6491	3.55994	22.8207	1.03931	0.278788	1.47976	97.6914	3.39028	5.8615	0.696629	3.20582	0.901055	0.199996	0.831771	0.119324	0.785279	0.160042	0.340044	0.0830156	0.707924	0.0946257	0.665381	0.196077	0.476249	2.61138	2.81377
Okaia-P_1	77.8396	0.270614	12.9649	1.36889	0.0297814	0.166558	1.35516	3.06532	2.93911	0.16863	6.95242	26.4841	6.00443		5.19	1560	5.72	344	1.71	1.9	40.5	14	131	97.6	22	175	8.04	2.03	6.89	699	21.8	43.7	5.15	19.4	3.51	0.75	3.48	0.566	3.66	0.73	2.11	0.333	3.05	0.42	4.55	0.678	1.49	17.2	12
Okaia-P_2	77.0466	0.259017	13.1531	1.60193	0.0661746	0.230311	1.51302	3.24358	2.88629	0.127878	7.1459	26.694	6.12987		5.18	1630	8.1	415	1.89	5.3	25.8	15.2	137	119	20.9	193	8.27	2.19	7.72	693	22.3	42.7	4.85	18.1	3.28	0.67	2.95	0.56	3.49	0.74	2.29	0.341	2.54	0.374	5.23	0.77	1.41	16.9	11.2
Okaia-P_3	77.9913	0.137051	12.6852	1.19208	0.0768998	0.119582	1.20723	3.66346	2.92711	0.165287	4.42892	26.6445	6.59056		4.6	809	2.2	407	0.81	3.9	28	14.3	110.1	96	22.7	124	7	1.64	6.85	690	23.7	43.1	4.53	20.2	3.9	0.59	3.6	0.47	4.5	0.8	1.9	0.39	2.46	0.34	3.36	0.59	1.56	15.8	11.1
Okaia-P_5	77.8696	0.147642	12.7223	1.10272	0.030247	0.140378	1.24646	3.62902	3.11157	0.190747	4.40168	25.0258	6.7406		4.7	839	1.43	410	0.86	2.63	28.4	14.7	107	89.7	22.6	129	6.67	1.46	6.5	651	23.6	45.9	4.59	18.9	4.3	0.42	4.2	0.51	4	0.92	2.58	0.34	2.68	0.4	3.18	0.55	1.36	15.2	11.39
Okaia-P_6	77.8746	0.131355	12.7862	1.3359	0.0227283	0.15244	1.18495	3.47887	3.03299	0.173331	4.58259	25.6759	6.51186		5.7	1110	3.01	462	1.04	1.99	48.6	16.5	143	113	26.3	146	10.3	2.43	8.1	840	25.6	51.1	6.09	23.8	5.3	0.81	4.51	0.71	4.55	0.88	2.9	0.41	2.81	0.4	4.31	0.9	2.5	14.7	12.2
Okaia-P_7	78.0469	0.186566	12.5152	1.29568	0.10524	0.143965	1.23302	3.60163	2.87179	0.165129	4.97927	27.1771	6.47342		5.09	1130	5.13	463	1.48	3.11	27.5	17.1	127	104	25.2	144	9.3	1.53	7.46	744	26.1	48.2	5.86	21.6	3.8	0.86	3.85	0.651	4.19	0.81	2.75	0.38	3.75	0.55	4.28	0.93	1.79	22	13.2
Okaia-P_8	78.2148	0.154525	12.6689	1.24515	0.0824407	0.11484	1.17696	3.34507	2.99729	0.177453	5.00658	26.0952	6.34235		4.78	782	1.41	387	0.94	2.94	19.8	14.9	110	94	24.7	129	7.4	1.27	6.33	680	25.1	46.2	5.03	18.5	4.3	0.71	4.17	0.71	4.3	0.73	2.51	0.217	2.79	0.48	3.61	0.85	1.56	14.9	11.6
Okaia-P_10	78.0622	0.132029	12.67	1.16243	0.0698039	0.0966761	1.25744	3.56584	2.98356	0.17087	5.06971	26.1642	6.54939		6	970	1.64	444	0.88	9.3	48.4	16.3	121	100.9	25.7	131	9.2	2.05	7.3	745	26.8	45.5	4.98	20.4	4.8	0.87	3.6	0.45	4.6	0.71	2.55	0.55	3.3	0.51	5.2	0.85	1.64	19.4	12.7
Okaia-P_11	77.1929	0.269902	12.8805	1.45702	0.0896812	0.199693	1.4189	3.29881	3.19262	0.161164	4.61532	24.1786	6.49143		5.1	1470	6.9	464	2.46	8.2	29.5	17.3	146	113	21	176	8.1	1.88	8.1	718	22.7	41.3	4.85	19.5	3.11	0.49	4.4	0.76	2.55	0.61	2.18	0.33	2.45	0.44	4.6	0.81	1.95	20.7	10.2
Okaia-P_12	77.9084	0.12645	12.5726	1.36952	0.0718754	0.118706	1.18994	3.55117	3.09137	0.191959	4.45308	25.2019	6.64255		5.91	1080	2.16	451	0.98	3.26	45.3	17.1	137	111	26.5	141	9.3	2.15	8.2	820	27	49.9	5.9	22.5	5.1	0.8	4.7	0.71	4.66	0.91	2.38	0.42	3.21	0.389	4.3	0.83	1.95	17.6	12.3
Okaia-P_13	79.4625	0.16113	12.03	0.889864	0.0923798	0.0829819	0.718411	3.112	3.45073	0.144515	6.09747	23.0277	6.56274		2.86	765	1.93	238	0.69	2.15	24.7	10.7	131	36.8	18.7	98	6.71	1.2	7.51	614	22.1	41.6	4.54	17.3	2.77	0.25	3.06	0.42	3.2	0.64	1.66	0.298	1.9	0.39	3.38	0.7	1.61	16.5	12.9
Okaia-P_14	77.1675	0.269096	12.9306	1.49351	0.0695292	0.207261	1.40595	3.24142	3.2151	0.157487	6.42746	24.0016	6.45651		4.44	1434	6.7	349	1.73	1.74	36	14.3	121.4	103.5	20.3	180	7.74	2	6.89	675	22.1	42.1	4.52	15.8	3.08	0.75	3.65	0.502	3.64	0.692	2.13	0.415	2.26	0.428	5.08	0.64	1.22	16.7	11.54
Okaia-P_15	76.6927	0.229972	13.0883	1.41455	0.116971	0.201006	1.56019	3.46272	3.23357	0.162224	5.23848	23.7177	6.69629		4.89	1630	8.48	389	2.09	Below LOD	25	13.7	125	121	21.3	196	8.33	1.96	6.66	712	22.3	42.6	4.77	16.7	3.88	0.43	3.5	0.52	3.8	0.83	1.82	0.38	2.61	0.396	4.99	0.71	1.59	15.9	11.6
Okaia-P_16	77.9932	0.192637	12.8377	1.17841	0.0685158	0.147709	1.20398	3.48735	2.8905	0.161891	5.04343	26.9826	6.37785		3.37	590	2.33	269	0.84	2.23	19.5	10.6	74	102.6	14.9	83	4.63	1.08	4.58	443	14.9	28.3	3.34	11.6	2.3	0.79	2.05	0.247	2.47	0.43	1.55	0.25	1.97	0.31	2.57	0.424	1.06	9.6	6.9
Okaia-P_17	77.9104	0.103806	12.6413	1.18414	0.0566401	0.124821	1.15044	3.74476	3.08365	0.212652	4.27826	25.2657	6.8284		5.27	896	1.55	454	1.6	4.57	23.6	14.8	139	95.3	25.6	137	8.3	1.39	8.2	722	26.2	48	5.31	21.6	4.8	0.69	4.4	0.57	4.3	0.88	2.85	0.37	2.76	0.336	3.73	0.81	1.44	18.8	13.1
Okaia-P_18	77.8905	0.133235	12.3441	1.31484	0.0457397	0.0808406	1.05445	3.52056	3.61576	0.176224	2.53921	21.5419	7.13632		5.9	870	1.27	340	0.81	1.64	45.9	15.5	147	85	27.2	147	8.1	1.73	7.7	810	27.6	55	6.3	24.1	4.5	0.71	4.5	0.68	4.4	0.93	3.21	0.54	3.4	0.35	4.7	0.61	1.51	18	12.7
Okaia-P_20	77.5919	0.15091	12.7658	1.36326	0.0553519	0.166339	1.36268	3.50022	3.04356	0.199255	4.22719	25.4938	6.54377		5.8	1020	4.23	434	1.41	5.6	17.9	17	130	106	29	159	9.4	1.48	7.9	740	27.1	49.3	5.5	19.4	4.6	0.73	4.1	0.74	4.8	0.72	2.8	0.35	4.3	0.4	3.3	0.55	1.8	16.5	12
Okaia-P_21	76.9294	0.259499	12.9861	1.41479	0.0366658	0.202612	1.35853	3.50391	3.3085	0.159095	4.70762	23.252	6.81241		5.37	1010	2.85	483	1.57	6.4	41	17	145	101	24.9	142	8.14	2.2	7.88	746	25.6	49	5.44	21.4	3.61	0.7	4.2	0.61	3.56	0.76	2.65	0.274	2.56	0.41	3.64	0.65	2.2	17.8	12.5
Okaia-P_22	78.4912	0.104964	12.7371	1.07783	0.0305451	0.107922	1.22322	3.49715	2.73014	0.164629	5.33467	28.7499	6.22729		5.45	950	2.14	456	1.02	3.24	29.5	16.5	121	103	24.7	152	7.9	2.3	8	740	26.9	55.5	6.02	20.2	3.7	0.88	4.4	0.53	3.36	0.87	2.87	0.277	2.79	0.43	4.6	0.66	1.18	15.8	11.5
Okaia-P_23	78.2366	0.14005	12.6246	1.16296	0.0759842	0.0900956	1.22378	3.64662	2.79924	0.169384	4.86291	27.9492	6.44586		6	1490	6.1	570	3.6	11.1	25.7	17.6	157	138	30.3	199	9.2	2.5	9.6	890	30.4	55.2	6.1	23.6	4.5	1.13	4.1	0.58	4.6	1.05	3.24	0.45	3.1	0.5	4.56	0.62	2.03	22.9	14
Okaia-P_24	76.5843	0.236796	13.2016	1.51101	0.069483	0.209712	1.52161	3.37838	3.28706	0.147851	4.63119	23.2987	6.66545		5.06	939	2.02	451	0.77	Below LOD	31.5	15	123	103	25.8	141	9	1.85	7.1	738	24.8	46.7	5.44	19.7	4.11	0.74	3.48	0.68	3.47	0.68	3.06	0.43	2.9	0.343	4.11	0.66	1.69	15.5	11.5
Average	77.7618	0.180821	12.7527	1.29221	0.0648894	0.147831	1.26506	3.45418	3.08055	0.168936	5.00111	25.363	6.53473		5.07905	1094	3.68095	413.333	1.38952	4.27368	31.5286	15.2429	127.738	101.59	23.8238	148.667	8.14429	1.82476	7.40333	719.524	24.5095	46.2333	5.19571	19.7286	3.96429	0.703333	3.85238	0.57981	3.90952	0.777238	2.47571	0.36881	2.83762	0.409333	4.15619	0.704381	1.64476	17.0667	11.8157
Standard Deviation	0.658137	0.0592469	0.269908	0.169555	0.0256211	0.0463505	0.183358	0.180524	0.218648	0.018896	1.01376	1.80168	0.249809		0.806225	314.26	2.39647	74.7384	0.710376	2.74532	9.73664	1.94643	18.0576	18.9049	3.57686	30.1518	1.2372	0.412148	0.988076	90.2467	3.17914	6.04809	0.718168	2.92184	0.784593	0.189798	0.640148	0.126077	0.673242	0.135625	0.491768	0.084842	0.559892	0.0614055	0.743159	0.130606	0.346332	2.82034	1.41793
Unit L_1	77.6469	0.169608	13.0049	1.16218	0.0822611	0.150968	1.0861	3.91332	2.78378	0.204906	4.79915	27.8926	6.6971		6.2	1300	2.6	607	0.7	7.1	39.1	17.4	95	106	35.3	166	11.4	2.54	4.76	880	28.6	57.5	7.03	29.7	6.63	1.3	6.16	0.94	6.1	1.39	3.77	0.63	4.6	0.65	5.1	0.8	1.36	17.9	10.7
Unit L_2	78.0256	0.163693	12.5505	1.07491	0.0473045	0.132488	1.23876	3.59174	3.17499	0.161165	0.669221	24.575	6.76673		3.7	835	2.16	358	1.07	2.03	36.7	12.4	102.6	90.2	21.6	125	6.07	1.55	6.12	607	20.6	41	4.05	15.1	3.7	0.65	3.35	0.433	2.75	0.75	2.66	0.29	2.69	0.41	3.88	0.54	1.62	14.2	11.6
Unit L_3	77.9143	0.062835	12.5352	1.15505	0.0477059	0.0500334	0.63085	2.82745	4.77655	0.225777	6.5559	16.3118	7.604		6.8	740	0.62	382	0.69	6.5	25.6	17.8	150	36.5	47	139	12.3	3.28	7.4	880	35.1	73	8.9	32	6.4	0.87	7.2	1.1	6.7	1.66	5.7	0.63	4.3	0.9	4.3	0.68	1.93	25.4	15
Unit L_4	78.1741	0.141743	12.6217	1.12908	0.0365504	0.132234	1.20475	3.41682	3.14296	0.166357	4.4065	24.8728	6.55978		4.49	950	2.76	394	1.22	2.91	32.5	14.6	115	94	22.2	148	6.56	1.58	7.4	659	22.2	45.8	5.01	17.1	3.8	0.62	3.46	0.59	3.76	0.66	2.62	0.35	2.04	0.45	4.9	0.7	1.44	15.6	12.2
Unit L_5	77.4686	0.184046	13.1569	1.09842	0.0730132	0.145645	1.2055	3.72306	2.94475	0.19939	4.29192	26.3074	6.66781		5.14	1190	1.74	574	0.46	Below LOD	25.5	14	90.4	95.6	29.2	155.6	8.79	1.88	3.93	787	25.1	53.1	6.27	24	4.57	1.04	4.9	0.63	3.9	0.98	3.67	0.63	4.14	0.52	4.9	0.7	1.41	12.5	8.6
Unit L_6	77.3984	0.185443	13.061	1.10079	0.0814026	0.152092	1.13047	4.00427	2.8861	0.197258	3.79511	26.8177	6.89036		4.21	930	1.94	325	1.02	2.01	24.9	14	121	117	18	134	7	1.61	7.5	653	20.8	41	5.1	17.3	3.6	0.73	3.15	0.42	2.59	0.66	2.65	0.307	2.03	0.224	3.53	0.61	1.49	14.2	9.3
Unit L_9	77.7255	0.190413	13.1617	1.09857	0.0920034	0.168961	1.15904	3.62685	2.77699	0.199022	5.71331	27.9891	6.40384		5.3	1340	1.94	615	0.6	1.89	46.8	17	97.2	114.9	35.8	170	10.6	1.76	4.43	911	27.6	58.3	7.41	26.2	4.77	1.37	5.82	0.94	6.28	1.24	3.88	0.6	4.16	0.6	5.24	0.91	1.34	15.8	10.42
Unit L_10	77.9446	0.138376	12.5275	1.34154	0.0750975	0.137202	1.28773	3.35699	3.19091	0.160164	5.34388	24.4271	6.54789		4.93	1024	3.03	399	1.16	4.02	30.1	14.4	130	106	22.6	139	7.91	1.63	6.7	682	22.4	43.1	4.84	19.7	3.3	0.61	2.96	0.483	3.42	0.84	2.58	0.56	2.66	0.3	4.05	0.67	1.27	15.1	12.3
Unit L_11	77.1136	0.186011	13.0843	1.25037	0.061553	0.171515	1.09778	4.11082	2.92399	0.19123	4.08886	26.3727	7.03481		6	1310	1.51	610	0.17	5.5	26.3	14.8	98	111	38.5	175	10.6	2.1	4.1	900	28.8	59	7.2	28.7	5.2	0.92	5.3	0.86	6.9	1.06	4.57	0.64	5.1	0.55	4.39	0.72	1.62	15.7	10
Unit L_12	77.2333	0.19058	13.0211	1.25417	0.088414	0.156116	1.17759	3.89073	2.98798	0.193388	4.61087	25.848	6.87871		5.78	1190	2.3	684	0.73	3.06	28.7	18	99	118	36	172	10.7	1.96	3.91	880	30.3	63.9	7.1	27.3	7	1.59	4.9	0.97	6.2	1.14	3.49	0.45	3.5	0.73	4.64	0.74	1.11	17.7	11.7
Unit L_13	78.1547	0.154612	12.6224	1.13594	0.0562134	0.120309	1.27896	3.5809	2.89598	0.135491	1.40847	26.9873	6.47687		4.38	1020	2.96	438	1.43	3.16	33.3	16.9	125	113	24.3	152	7.7	1.71	7.02	730	25.3	49.6	5.17	18.1	4.2	0.88	3.2	0.61	3.42	0.71	2.32	0.35	2.92	0.51	3.72	0.68	1.54	17.1	13.4
Unit L_14	78.0265	0.137288	12.3746	1.17789	0.0198629	0.115974	1.11412	3.59754	3.4362	0.145288	2.94902	22.7072	7.03374		4.52	1090	2.9	420	1.46	2.7	24.3	15.8	154	103	24.2	134	7.9	2.07	9.5	860	25.9	53.1	5.56	21.7	3.9	0.52	2.81	0.57	4.27	0.73	2.98	0.39	3.5	0.4	5	1.04	2.13	16	15.6
Unit L_15	77.4875	0.145931	13.0578	1.21565	0.0740881	0.125432	1.10395	3.98182	2.8078	0.204421	4.05428	27.5972	6.78962		5.28	1030	1	531	0.27	Below LOD	15.9	14.2	87.2	94	34.1	152	8.95	1.95	3.9	717	23.9	53.4	6.19	24.3	5.13	1.17	5	0.72	5.5	1.25	3.9	0.45	3.23	0.76	4.6	0.62	1.31	14.6	9.3
Unit L_16	77.7418	0.141305	12.5553	1.3284	0.0340459	0.129319	1.25242	3.63458	3.18281	0.149793	0.913217	24.4255	6.81739		5.08	1110	2.48	390	1.08	1.15	44.4	13.3	135	106	22.8	153	8.3	1.77	7.9	749	23.9	47.6	5.11	19.2	3.7	0.76	4.01	0.49	3.26	1.06	2.64	0.344	3.29	0.46	4.4	0.81	1.46	15.7	13.3
Unit L_17	77.5923	0.109547	12.5496	1.3078	0.0638668	0.143749	1.14556	3.78293	3.30461	0.151633	0.0178579	23.4801	7.08754		4.58	940	2.11	362	1.04	2.15	21.6	13.1	122	96.1	21.7	142	6.62	1.62	6.77	635	21.2	41.6	4.99	18.2	3.6	0.68	4	0.55	3.31	0.72	2.51	0.47	2.51	0.46	4	0.78	1.24	12.4	11.5
Unit L_18	77.9927	0.14566	12.3988	1.16245	0.0801778	0.115234	1.16187	3.49016	3.45298	0.171496	2.32549	22.587	6.94314
Unit L_19	78.099	0.151854	12.3728	1.11387	0.0402032	0.122566	1.24422	3.56184	3.29363	0.150083	1.10484	23.7121	6.85547
Unit L_20	78.061	0.130105	12.423	1.23961	0.0798545	0.118301	1.12611	3.49959	3.32236	0.15567	1.93008	23.4956	6.82196		3.97	897	2.48	319	0.99	2.65	17.7	12.2	127	81.3	19.9	120	6.13	1.92	7.11	671	21.6	43.5	4.77	17.1	2.79	0.71	3.5	0.46	2.63	0.58	1.84	0.4	2.57	0.36	3.63	0.73	1.67	14	12.6
Unit L_21	77.535	0.174362	12.9844	1.09485	0.033941	0.152667	1.10842	4.04436	2.87207	0.192472	4.15688	26.9962	6.91643		5.41	1230	1.62	700	0.6	6.4	20.8	18.2	98	113	34.4	153	10.1	1.29	4.36	880	26.9	58	6.7	27.5	5.4	1.18	5.2	0.94	5.9	1.22	3	0.55	3.6	0.4	3.5	1.1	1.54	17.8	10
Unit L_23	78.0987	0.147286	12.568	1.13243	0.0442005	0.135876	1.26571	3.474	3.13376	0.142612	1.87102	24.9217	6.60775		4.46	1100	2.14	416	1.29	4.8	42.3	16.2	138	101	24.2	154	7.7	2.04	8	704	23.6	49.2	5.24	18.7	4.1	0.77	3.2	0.57	3	0.76	2.59	0.4	2.44	0.33	5.02	0.67	1.6	14.1	13.2
Unit L_24	77.8838	0.154474	12.5493	1.26553	0.0754933	0.138339	1.25868	3.64065	3.03371	0.173826	4.24426	25.6728	6.67436		4.89	1120	3.3	454	1.04	8.9	16.2	15	125	102	23.2	147	8.06	2.16	7.8	721	25.4	46.5	5.68	21.9	4.32	0.72	4.6	0.73	4.02	0.76	2.11	0.65	2.9	0.38	3.8	0.8	1.78	16.6	11.5
Unit L_25	78.1313	0.125125	12.3748	1.28016	0.0342962	0.123229	1.17617	3.60633	3.14854	0.169217	1.63653	24.8151	6.75487		4	871	2.19	399	0.92	Below LOD	39.8	16	112	101	23.6	139	7.6	2.03	6.61	730	23.8	46.6	4.52	17.1	4	0.97	4	0.57	2.98	0.65	1.64	0.32	2.18	0.39	3.8	0.51	1.85	16.9	12.4
Average	77.7931	0.151377	12.7071	1.18726	0.0600704	0.133557	1.15703	3.65258	3.15788	0.174575	3.22212	24.946	6.81046		4.956	1060.85	2.189	468.85	0.897	3.93706	29.625	15.265	116.07	99.98	27.93	148.48	8.5495	1.9225	6.261	761.8	25.15	51.24	5.842	22.045	4.5055	0.903	4.336	0.6788	4.3445	0.941	3.056	0.47055	3.218	0.4892	4.32	0.7405	1.5355	15.965	11.731
Standard Deviation	0.316845	0.0299941	0.2899	0.0834373	0.0213609	0.0247369	0.134011	0.282089	0.415801	0.0249861	1.81594	2.52302	0.254054		0.80613	167.379	0.677207	120.816	0.359548	2.21615	9.42616	1.86978	19.732	17.7728	7.77974	14.9897	1.82683	0.422323	1.70162	100.99	3.64121	8.46916	1.21882	5.05189	1.14288	0.28892	1.20382	0.207794	1.50333	0.297585	0.976171	0.128276	0.884168	0.168374	0.576505	0.146376	0.250861	2.74251	1.85429
Awakeri_3	77.4767	0.186249	12.9746	1.11764	0.0889397	0.184721	1.04585	4.05016	2.87512	0.184362	4.42968	26.9473	6.92527
Awakeri_5	77.6519	0.20607	12.9625	1.08427	0.0542279	0.170964	1.0476	3.89327	2.92918	0.181373	4.58946	26.5098	6.82245		6.2	1050	1.17	543	0.29	1.11	50.1	16.1	98	94	33.3	150	10.2	1.77	4.07	769	25.5	59.4	6.8	25.3	4.53	1.03	4.45	0.77	5.5	1.03	3.68	0.511	3.38	0.531	4.2	0.74	1.14	14.4	9.8
Awakeri_6	77.7332	0.179123	12.8337	1.0793	0.0788155	0.161102	1.02277	3.73362	3.17831	0.174571	3.87562	24.4574	6.91193		2.13	340	0.44	155	0.078	0.8	16.1	8.1	32	110.9	11.6	53	3.6	0.75	1.34	300	9.6	20.2	2.29	9.5	1.9	0.69	1.69	0.26	1.87	0.33	1.22	0.145	1.52	0.221	1.66	0.26	0.36	5.6	3.8
Awakeri_7	77.2626	0.192005	12.937	1.0806	0.0714159	0.189796	1.06331	4.19089	3.01232	0.151181	4.26558	25.6489	7.20321		6.24	1170	1.39	637	0.59	1.9	39.7	17.9	105	99.6	33.7	157	10.6	2.11	5.1	861	28.3	61.6	7.35	29.7	5.2	1.17	5.91	0.9	6.03	1.27	3.42	0.58	3.97	0.59	4.54	0.782	1.39	17.2	10.2
Awakeri_8	77.4464	0.175074	13.0242	1.04798	0.094928	0.182146	1.02033	4.0709	2.93807	0.157827	3.64551	26.3596	7.00897		5.8	1210	1.28	623	0.46	1.86	45.7	17.3	110	107	36.1	166	10.8	2.39	4.38	950	30.3	62.6	7.01	31.2	5.35	1.37	5.31	0.89	5.96	1.2	3.83	0.7	4.16	0.62	4.99	0.87	1.5	19.2	10.8
Awakeri_9	77.6515	0.165237	12.8518	1.18367	0.0578932	0.228573	1.05347	3.83397	2.97389	0.153341	4.24643	26.1111	6.80785		5.41	1060	1.17	582	0.36	2.44	22	15.7	91	89	32.1	150	9.4	1.53	3.6	778	27.6	56	6.66	26.7	5.23	1.13	4.91	0.93	5.2	1.07	3.16	0.54	3.64	0.42	4.12	0.64	1.02	14.6	9.4
Awakeri_10	77.0562	0.207114	12.8289	1.15633	0.0415823	0.206509	1.18915	4.27427	3.03992	0.0912578	0.0150594	25.3481	7.31419		6.6	1460	1.71	709	0.36	2.4	59	20.6	116	116	39.4	199	12.2	2.35	3.4	940	29.6	72	8.5	28.6	6.1	1.57	6.2	1.01	5.75	1.1	4.1	0.72	3.62	0.55	5.4	0.72	1.28	20	12
Awakeri_11	77.1517	0.175041	12.7925	1.43338	0.0595756	0.180691	1.1247	4.06961	3.01277	0.110565	2.29806	25.6082	7.08238		6.79	1470	1.8	688	0.43	1.25	59.5	17.4	110	112	39.4	194	11.9	2.05	3.86	950	30	68	7.92	32.1	7.4	0.327	6.4	1.14	5.94	1.39	3.86	0.72	5	0.71	6.04	0.96	1.38	17.3	12.1
Awakeri_12	77.3759	0.187212	13.0013	1.26089	0.0585111	0.15327	1.04194	4.05408	2.86693	0.137193	3.67869	26.9891	6.921		7	1150	1.92	660	0.34	5.7	23.6	17.4	99	98	33.2	159	10.4	1.84	4.1	840	27.6	58	6.7	27.3	5.57	1.27	5.3	0.91	6.3	1.14	4.6	0.53	3.24	0.59	4.6	0.7	1.66	18.4	10.3
Awakeri_13	76.8243	0.162314	13.5957	0.992471	0.069703	0.179246	1.32826	3.96783	2.88019	0.114892	3.23851	26.6734	6.84802		8.8	1600	1.47	840	0.42	1.62	49.7	22.1	140	123	43.9	206	14.5	2.9	7	1120	35.8	77	8.9	32.4	7.5	1.29	8.9	1.46	7.1	1.35	5.42	0.65	5.1	0.64	5.9	1.17	2.2	21.1	12.5
Awakeri_15	77.5339	0.191101	12.9714	1.15686	0.0821655	0.158782	1.02111	3.9657	2.91891	0.145941	4.42142	26.5627	6.88461		5.62	1190	0.92	606	0.52	1.49	31.4	16.7	104	101	35.5	161	10.5	2.07	4.7	860	28.1	62.5	7.2	30.6	6.1	1.29	6.5	0.97	5.1	1	3.96	0.51	3.8	0.62	4.72	0.74	1.46	16.9	10.4
Awakeri_16	77.4265	0.20356	12.918	1.29217	0.0638891	0.160087	1.04616	3.91321	2.97636	0.145048	4.55604	26.0139	6.88956		6.3	1270	1.19	599	0.39	Below LOD	55.7	17.5	105	103	33.9	155	10.21	2.63	4.99	859	26.5	63.3	7.3	26.8	6.3	1.27	5.5	0.94	5.4	1.09	3.6	0.79	3.76	0.52	4.39	0.8	1.82	16.9	9.78
Awakeri_17	77.5389	0.184939	12.8529	1.2783	0.063356	0.159824	1.06296	3.94488	2.91389	0.155824	3.75293	26.6101	6.85876		6.3	1230	1.48	663	0.47	2.75	40	17.7	100	105	40	163	12.1	2.07	6	1060	32.8	69	7.9	30.4	6.8	1.25	6.1	1.1	6.2	1.13	3.99	0.6	4.7	0.68	4.7	0.77	1.6	18.8	11.5
Awakeri_18	77.2641	0.173413	12.9741	1.22953	0.0918117	0.192358	1.03675	4.03256	3.0054	0.155245	3.39394	25.7084	7.03796		5.87	1230	1.62	655	0.45	2.3	51.4	18	104	108	35.7	162	10.4	2.15	4.9	930	31	64.9	7.5	28.7	6.8	1.07	5.68	0.86	6.5	1.6	3.37	0.65	4.46	0.57	4.42	0.75	1.8	19.7	10.9
Awakeri_19	77.4357	0.174302	13.0001	1.18541	0.084963	0.151475	1.00313	4.01858	2.94636	0.143043	3.21875	26.2819	6.96493		5.18	1010	1.49	518	0.282	0.98	43.2	14.9	88	92	30.4	140	9	1.78	3.26	780	24.7	55	6.6	24.9	5	1.11	3.82	0.72	4.16	0.93	2.98	0.47	3.11	0.66	4.05	0.63	1.27	14.5	9.5
Awakeri_20	77.3057	0.196499	13.019	1.16625	0.0689304	0.18828	1.02616	4.05112	2.9781	0.143452	3.49436	25.9581	7.02922		7.3	1350	2.1	740	0.37	2.8	50.5	21.1	123	117	36.6	194	13	2.17	6.3	1020	35.6	73	9.1	35	6.9	1.34	6.6	1.05	6.8	1.35	3.7	0.64	4.8	0.61	4.74	0.97	1.52	23.5	11.7
Awakeri_21	77.7428	0.176249	12.9972	0.987853	0.0704672	0.147774	1.02183	3.78446	3.07131	0.147929	4.28791	25.3125	6.85578		5.62	1120	1.27	556	0.36	2.27	33.4	15.5	91.4	95.8	31.8	141	10.2	1.73	4.2	860	27.2	56.5	6.35	26.3	5.77	0.91	5.33	0.85	5.44	1.06	3	0.47	3.71	0.43	4.47	0.68	1.46	15.8	9.23
Awakeri_22	77.5274	0.207879	13.0428	1.11716	0.0656492	0.187708	1.04122	3.84578	2.96431	0.154523	4.30032	26.1536	6.81009		9.8	1840	2	960	0.59	3.63	88	28.1	153	159	54.4	241	18.3	3.15	6	1390	48.1	100	10.8	40.9	10.2	1.49	7.9	1.4	8.1	1.81	4.87	0.89	5.6	1.03	6.6	1.38	1.99	26.7	15.9
Awakeri_23	77.4833	0.162013	12.8402	1.26649	0.107381	0.193495	1.04978	3.91264	2.9847	0.164722	4.495	25.9601	6.89734
Awakeri_24	77.4279	0.162024	13.0028	1.11434	0.0609503	0.206481	1.07023	4.01548	2.93981	0.152653	4.50172	26.3377	6.95529		5.99	1300	2.6	660	0.43	2.9	56.9	18.2	103	101	34.9	159	11	1.82	3.65	900	27.7	59.2	6.31	28.7	5.29	1.1	4.48	0.77	5.32	1.05	3.15	0.58	3.43	0.54	5	0.71	1.98	19.4	10
Awakeri_25	77.4258	0.181189	12.9277	1.11475	0.0728685	0.180369	1.07455	4.09775	2.92499	0.128787	0.165515	26.4705	7.02274		5.48	1062	1.17	583	0.42	1.03	54.6	15.3	81.9	96.4	34.3	156	8.29	1.64	3.63	816	25.7	56.1	6.43	24.4	5.16	1.04	5.4	0.79	5.48	1.34	4.05	0.551	3.75	0.66	4.61	0.77	1.24	14.9	9.71
Average	77.4163	0.183267	12.969	1.15932	0.0718107	0.179221	1.06625	3.9867	2.96813	0.14732	3.56526	26.0963	6.95484		6.23316	1216.42	1.48368	630.368	0.400526	2.17944	45.8158	17.6632	102.858	106.721	35.2737	163.474	10.8737	2.04737	4.44632	893.842	29.0368	62.8579	7.24316	28.3947	5.95263	1.143	5.59895	0.932632	5.69211	1.17053	3.68211	0.591947	3.93421	0.589053	4.69211	0.791684	1.47737	17.6263	10.5011
Standard Deviation	0.22132	0.0149939	0.162165	0.107325	0.0156069	0.0207325	0.0723066	0.129932	0.0718859	0.0223454	1.29324	0.604394	0.129243		1.52411	297.305	0.479435	155.56	0.115302	1.17589	16.5138	3.84696	24.2503	15.5711	7.88556	37.113	2.8327	0.526116	1.3042	205.316	7.11206	14.7192	1.6593	6.02877	1.61729	0.282636	1.51197	0.255513	1.25734	0.299026	0.8679	0.155083	0.906871	0.1553	1.00089	0.227084	0.410783	4.29804	2.25334
Mangaone-P_1	77.2315	0.177459	12.988	1.20887	0.0788098	0.188558	1.13357	4.03927	2.95393	0.181027	0.351752	26.1454	6.9932		5.21	1210	1.83	645	0.46	2.19	22.6	15.1	89.2	106.1	33.6	165	8.84	2.12	4.02	842	27.2	55.2	6.52	27	5.57	1.16	6.21	0.741	4.92	1.16	3.75	0.56	4.12	0.66	5.3	0.71	0.95	12.6	9.5
Mangaone-P_2	77.0999	0.18759	13.3343	1.12443	0.0891958	0.189794	1.21691	3.96496	2.79289	0.171265	2.63236	27.6058	6.75784		4.44	1140	1.53	643	0.35	Below LOD	20.5	17.1	85.5	115	33.4	169	8.2	1.7	4.17	802	26.6	54.3	6.33	24.5	4.84	1.12	5.1	0.81	5.52	1.2	3.08	0.62	3.53	0.61	4.74	0.73	1.3	13.5	9.1
Mangaone-P_3	76.6913	0.205727	13.088	1.26898	0.0617425	0.242001	1.19608	4.35671	2.88941	0.1736	2.7341	26.5422	7.24611		6.6	1400	2.3	750	0.57	5.8	25.3	19.6	104	126	40.1	207	9.7	2.2	6.7	870	28.9	60	7.1	31	4.7	1.16	6.7	0.94	6.1	1.44	4.33	0.75	4.3	0.54	5.3	0.85	1.66	18.7	10.8
Mangaone-P_4	76.8154	0.224073	13.25	1.23407	0.0956715	0.221292	1.17286	4.10482	2.8818	0.167247	3.42864	26.6553	6.98662		5.14	1330	2.32	658	0.54	5.2	40.7	16.1	91	115	31.3	167	9.2	1.77	4.09	815	24.2	51.5	6.22	25	5.06	1.29	4.37	0.79	4.77	1.08	3.16	0.53	3.7	0.484	4.69	0.68	1.3	15.6	8.9
Mangaone-P_5	77.0459	0.206166	13.1582	1.2125	0.056491	0.20007	1.16743	4.02859	2.92467	0.197812	3.50523	26.3434	6.95326		4.6	1350	1.6	659	0.41	1.94	48.2	15.1	90	119	33.3	168	10	1.77	3.43	860	25.7	55.4	6.15	24.9	5.9	1.11	4.55	0.92	4.8	1.11	3.34	0.6	3.29	0.388	4.53	0.69	1.42	14.4	9.2
Mangaone-P_6	77.0604	0.23562	13.2715	1.20593	0.065252	0.205873	1.0881	4.049	2.81827	0.19607	3.71778	27.3431	6.86728		4.94	1320	1.84	675	0.53	1.71	34.1	16.7	93	115	31	171	9.5	2.36	4.24	818	26	53.7	6.35	26.8	5.4	1.15	5.8	0.67	5.3	1.01	3.29	0.58	3.72	0.5	4.28	0.71	1.3	15.4	9.6
Mangaone-P_7	76.6761	0.203027	13.2287	1.2102	0.0938958	0.246933	1.20057	4.23342	2.90713	0.17549	2.58632	26.3752	7.14055		5.3	1190	1.58	620	0.48	2.82	17	16	88	107	32	161	8.6	1.07	3.2	720	22.7	48	6	23.1	3.8	0.89	4.4	0.55	3.8	0.91	2.89	0.5	3.61	0.47	3.7	0.58	1.41	13.2	7
Mangaone-P_8	76.9831	0.212119	13.267	1.19978	0.111028	0.232085	1.21476	3.89508	2.8851	0.191224	3.47129	26.6829	6.78018		4.94	1230	1.98	740	0.34	2.5	38	17.8	93	130	36.8	181	9.2	1.68	3.67	840	28.1	54	5.72	25	5.3	1.18	4.4	0.79	5.31	1.03	2.88	0.55	4.06	0.61	4.33	0.85	1.19	14.5	9.6
Mangaone-P_9	76.3111	0.214586	13.6437	1.22911	0.0270056	0.268465	1.29748	4.19756	2.81095	0.195561	0.785532	27.1478	7.00851		4.6	1223	1.54	653	0.42	0.85	50.4	14.8	76.9	118.2	31.6	173	8.56	1.24	3.47	736	24.2	53.1	6.34	23.3	5.2	1.12	4.96	0.79	5.2	1.15	3.53	0.438	3.57	0.533	4.71	0.72	0.95	13.5	8.4
Mangaone-P_11	76.0961	0.193941	13.7117	1.23157	0.0955666	0.245714	1.28555	4.17204	2.96781	0.200114	0.422282	25.6404	7.13986		4.5	1257	1.82	734	0.5	1.47	26.9	15.9	80.1	132.8	35.6	185	9.54	1.75	3.39	802	26.9	54.4	6.19	25.9	5.7	1.22	5.17	0.8	5.35	1.21	3.69	0.52	4.16	0.73	5.39	0.697	1.2	13.6	9.45
Mangaone-P_12	76.5208	0.207427	13.4961	1.21814	0.0880451	0.220038	1.17425	4.31474	2.76042	0.17947	2.4092	27.7207	7.07516		4.59	1170	1.67	641	0.39	1.14	38.8	14.8	77	116.4	30.3	166	9.6	1.41	3.39	725	23.5	47.9	5.62	22.1	4.43	0.99	5.07	0.607	4.3	0.969	3.08	0.46	3.28	0.49	5.04	0.6	1.18	13.4	7.78
Mangaone-P_13	76.0012	0.203331	13.478	1.39177	0.102083	0.218804	1.31154	4.43002	2.86323	0.174873	0.44319	26.5439	7.29325		4.93	1278	1.81	724	0.43	1.39	26.5	15.6	84.4	132.5	35.2	191	10.24	1.72	3.54	817	27.8	54.9	6.55	26.2	6.12	1.23	5.9	0.86	6.25	1.21	3.78	0.511	3.98	0.7	5.71	0.72	1.21	13.9	9.1
Mangaone-P_14	76.2758	0.237833	13.5178	1.39169	0.104506	0.259263	1.32841	4.0465	2.83821	0.169782	3.63536	26.8746	6.88471		5.03	1335	1.82	780	0.32	1.59	30.4	17.5	91.5	138	33.5	210	10.3	1.9	4.27	766	25.6	55.6	6.75	25.8	5.42	1.2	5.67	0.83	5.91	1.09	4.34	0.55	3.97	0.55	5.57	0.79	1.08	14	9
Mangaone-P_15	76.4142	0.22988	13.4499	1.33625	0.0516142	0.268078	1.26923	4.15641	2.82442	0.18228	3.33802	27.0549	6.98083		5.14	1240	2	663	0.49	1.62	24.9	16.7	88.3	121	34.3	177	10.6	1.82	3.94	824	26.9	52.9	6.29	25.7	5.28	1.06	5.32	0.92	6.07	1.13	3.47	0.53	4.14	0.61	5.15	0.76	1.42	14.9	9.4
Mangaone-P_16	76.9203	0.199713	13.2395	1.30841	0.0702795	0.194205	1.16219	4.04157	2.86376	0.191898	2.71759	26.8599	6.90533		4.99	1191	1.64	620	0.42	1.71	24.3	14.4	86.1	116	31.1	166	10.3	2.08	3.82	824	28	52.4	6.52	25.4	6.1	1.05	5.4	0.96	5.05	1.05	3.59	0.591	3.7	0.525	4.84	0.635	1.21	13.4	9.14
Mangaone-P_17	77.589	0.195385	13.211	1.02376	0.0917335	0.20937	0.994089	3.70688	2.97885	0.145119	5.32595	26.0466	6.68573		4.47	1060	1.75	546	0.44	0.95	41.2	13.5	84	96	27.9	147	8.8	1.56	3.37	731	22.8	49.2	5.61	22.6	4.82	1.06	5.1	0.69	4.67	0.85	2.88	0.482	3.06	0.57	3.81	0.69	1.13	12.5	8.2
Mangaone-P_18	76.7153	0.212254	13.2805	1.1257	0.0584225	0.200126	1.19854	4.26441	2.94478	0.164165	3.53248	26.0513	7.20918		5.07	1270	2.02	709	0.38	1.8	46.7	18.8	101	120	32.5	161	10.92	1.71	4	825	25.4	52.3	6.16	25.3	5	1.09	5	0.87	5.64	1.01	2.7	0.47	3.2	0.51	4.5	0.74	0.91	16.7	7.67
Mangaone-P_19	76.7412	0.194002	13.2427	1.24587	0.102093	0.189787	1.18101	4.26338	2.83992	0.197015	0.453181	27.0223	7.10329		4.79	1032	1.91	587	0.34	1.27	28.6	13.8	80.3	106.6	29.8	153	8.9	1.72	2.92	737	24	49.9	5.93	22.3	5.12	1.14	5.04	0.88	4.88	0.93	3.43	0.504	3.38	0.584	4.64	0.69	0.96	12.5	8.9
Mangaone-P_20	76.9837	0.1849	13.2539	1.3269	0.0839085	0.197109	1.1647	4.13873	2.66605	0.174262	3.1036	28.8756	6.80477		5	1210	2.12	663	0.43	1.52	47.2	16.4	89.3	111.2	31.1	166	10.3	1.93	4.13	822	26.7	54.4	6.26	25.1	5.62	1.16	4.5	0.88	5.53	1.19	3.39	0.53	3.13	0.55	4.77	0.67	1.06	14.6	9.08
Mangaone-P_21	76.2274	0.193919	13.4877	1.35726	0.109597	0.228037	1.29859	4.27953	2.81788	0.178034	2.21071	27.0513	7.09741
Mangaone-P_22	76.9437	0.184349	13.1571	1.26991	0.0566717	0.227972	1.16839	4.1007	2.89113	0.179055	2.18254	26.6138	6.99183
Mangaone-P_23	76.8325	0.20079	13.074	1.24908	0.0731635	0.216961	1.14367	4.27309	2.93672	0.186334	1.50108	26.1627	7.2098
Mangaone-P_24	76.8641	0.214144	13.2334	1.29874	0.048454	0.217633	1.17315	4.10865	2.84168	0.184421	2.75408	27.0488	6.95033
Mangaone-P_25	76.822	0.185643	13.3738	1.21612	0.0963593	0.245494	1.21013	4.14493	2.70548	0.187044	4.11793	28.395	6.85041
Average	76.7442	0.204328	13.3099	1.24521	0.0796495	0.222236	1.19797	4.13796	2.85852	0.180965	2.55668	26.8668	6.99648		4.96211	1233.47	1.84632	668.947	0.433684	2.08167	33.2789	16.0895	88.0316	117.989	32.8632	172.842	9.54211	1.76368	3.88211	798.737	25.8526	53.1105	6.24263	25.1053	5.23053	1.12526	5.19263	0.805158	5.23	1.091	3.4	0.540842	3.67895	0.558632	4.78947	0.711158	1.20211	14.2579	8.93789
Standard Deviation	0.378808	0.0162211	0.178443	0.0849007	0.0223881	0.0246741	0.0753288	0.157976	0.0783727	0.0128685	1.31746	0.746126	0.16294		0.477302	94.4877	0.234786	58.7126	0.0718185	1.34216	10.3672	1.61276	7.10313	10.5612	2.78392	16.2079	0.774995	0.312911	0.786007	47.6956	1.85633	2.93464	0.373301	2.03974	0.574442	0.0911268	0.64277	0.112626	0.632675	0.135856	0.455058	0.0700764	0.387282	0.0828836	0.544839	0.0699478	0.195607	1.54032	0.845331
Hauparu-P_1	75.196	0.375399	13.5751	1.95951	0.0626634	0.381931	1.70804	3.90555	2.83576	0.14442	2.68915	26.517	6.74131		6.4	2670	10.4	611	1.45	5.7	20.1	13.7	82.6	134	28.8	226	8.7	2	3.85	730	24.1	45	5.12	23	3.6	0.81	3.7	0.66	3.55	0.95	2.73	0.56	2.5	0.5	4.9	0.46	1.37	10.8	7
Hauparu-P_2	74.8435	0.410336	13.886	1.72984	0.0649831	0.388692	1.76154	4.11451	2.80058	0.124751	3.31938	26.7242	6.9151		8	2180	12.3	660	1.91	Below LOD	Below LOD	18	96	153	30.8	250	9.3	1.76	4.4	778	26.4	48.8	5.53	23.7	5.6	0.97	4.3	0.79	5.02	1.09	3.05	0.401	3.33	0.52	6	0.57	1.21	16.8	8.61
Hauparu-P_3	77.7885	0.397892	12.3903	1.52829	0.0823486	0.32741	1.25666	3.58069	2.64791	0.107609	3.51203	29.3773	6.2286		4.7	2010	9.3	586	1.15	3.74	24.1	13.1	65	113.9	24.7	215	8.4	1.23	2.89	780	22.2	40.2	4.89	21	3.3	0.81	3.6	0.62	4.5	0.8	2.76	0.46	2.87	0.47	5.27	0.57	0.98	8.89	7.7
Hauparu-P_5	74.5361	0.404054	13.8897	2.00004	0.0811535	0.432562	1.88592	3.91917	2.85127	0.111181	0.952613	26.1413	6.77044
Hauparu-P_6	74.7765	0.408221	13.8299	2.07425	0.055735	0.422457	1.84821	3.75607	2.82858	0.124426	0.538572	26.4361	6.58465		7.74	2520	15.9	694	2.06	2.42	66	16.7	91.4	166	34.1	267	10.8	1.88	3.78	864	25.7	54.9	6.32	26.6	6.11	1.03	5.35	0.836	5.79	1.18	3.23	0.531	4.08	0.63	6.6	0.87	1.34	16	9.28
Hauparu-P_7	75.093	0.38838	13.5266	1.8939	0.0681206	0.399622	1.81951	3.96095	2.84989	0.15895	2.34711	26.3495	6.81083
Hauparu-P_9	75.2266	0.403572	13.6439	1.9722	0.0844954	0.372237	1.86777	3.62307	2.8061	0.164268	4.87002	26.8082	6.42917		6.1	2330	13	680	2.43	6.8	19	14.4	80	148	31.1	245	9	1.57	Below LOD	710	23.1	46.3	4.74	20.2	4.1	0.88	2.6	0.96	4.9	0.81	3.3	0.6	2.6	0.17	3.6	0.31	1.33	10.6	5.7
Hauparu-P_10	73.8086	0.406811	14.4464	2.14356	0.0659727	0.561561	2.18411	3.97243	2.41048	0.144272	4.76955	30.6199	6.38291		5.32	2120	12.66	740	1.78	1.31	68.3	17.5	72.2	173	25.7	185	8.3	1.41	2.47	696	20.2	40.5	4.58	18.8	4.39	0.9	4.04	0.71	4.77	0.92	2.46	0.38	2.88	0.44	5.11	0.489	0.85	11.93	6.97
Hauparu-P_12	74.8788	0.452389	13.6627	1.91984	0.105105	0.368351	1.87886	3.91039	2.82348	0.123649	3.30585	26.5201	6.73387
Hauparu-P_13	74.4006	0.424674	13.8646	2.14712	0.114911	0.433227	1.90228	3.79158	2.92098	0.12832	1.10459	25.4711	6.71257		7.1	2300	12	633	1.87	3.43	56.7	15.4	86.5	154	32.4	259	9.51	1.9	3.83	787	24.3	52.1	6.11	22.9	5.53	1.27	5.32	0.86	5.42	1.16	3.42	0.48	4.2	0.527	6.44	0.67	1.24	14.9	9.59
Hauparu-P_14	75.5622	0.338762	13.817	1.90091	0.0826374	0.368333	1.58261	3.59058	2.75701	0.15947	0.622897	27.4073	6.34759		7.19	2420	14.62	642	2.08	1.8	57.5	15.8	87.8	157.8	31.6	251	9.84	1.82	3.41	802	24.1	51.1	5.92	25.2	5.11	1.06	4.99	0.74	5.41	1.076	3.48	0.592	3.53	0.602	5.78	0.71	1.24	14	8.54
Hauparu-P_15	74.931	0.375967	13.8231	1.9383	0.0683837	0.366996	1.86508	3.88005	2.75118	0.151972	4.07389	27.2359	6.63123
Hauparu-P_16	74.6972	0.419583	13.9011	2.12676	0.0731918	0.431524	1.92146	3.79874	2.63049	0.14649	4.06381	28.3967	6.42922
Hauparu-P_17	74.6282	0.368468	14.146	1.71204	0.116089	0.485643	2.11201	4.10681	2.32476	0.164452	3.70051	32.1015	6.43157
Hauparu-P_18	75.1039	0.352364	13.7103	1.95277	0.0571285	0.411146	1.74407	3.85229	2.8161	0.131897	4.582	26.6695	6.66839		7.66	2370	11.9	604	1.56	2.9	30	17	78	147	34.2	264	8.99	1.28	4.02	834	25.1	45.8	5.92	23.3	4.88	1.135	5	0.79	4.7	1.03	3.25	0.399	3.6	0.48	5.5	0.74	0.92	11.7	8.36
Hauparu-P_19	76.3277	0.286049	13.6843	1.44647	0.0381877	0.312923	1.58352	3.72621	2.59464	0.183399	5.64344	29.4174	6.32085
Hauparu-P_21	76.6576	0.277603	13.1498	1.25157	0.114941	0.293718	1.41607	4.16948	2.6692	0.190366	1.93445	28.7194	6.83867		5.55	1760	10	488	1.4	1.56	37.7	12.7	62.8	117.2	25.4	189	7.14	1.22	2.88	613	19.1	38.3	4.3	18.5	3.93	0.86	3.66	0.617	4.19	0.92	2.3	0.435	3.11	0.417	4.79	0.563	0.88	10.45	6.94
Hauparu-P_22	74.4656	0.437054	13.9505	2.11242	0.0951698	0.410778	1.81607	3.94444	2.76797	0.124978	0.977888	26.9026	6.71241
Hauparu-P_23	76.3269	0.298891	13.5707	1.34856	0.0603144	0.305456	1.6002	3.85865	2.63036	0.156809	5.02669	29.0177	6.48901
Hauparu-P_24	75.1444	0.393242	13.6605	1.96888	0.0938804	0.385357	1.72018	3.90131	2.7323	0.171815	3.55445	27.5022	6.63361
Hauparu-P_25	74.7433	0.405828	13.7267	2.02433	0.0976353	0.40144	1.83978	3.97794	2.78298	0.171088	2.53209	26.8572	6.76093		7.52	2220	11.8	624	1.84	2.42	25	16.1	81.1	149.6	32.9	259	8.66	2.14	3.85	758	24.9	51.5	5.83	23.4	4.92	1.14	5.35	0.752	5.07	1.12	3.16	0.452	3.82	0.484	6.72	0.578	1.07	12.68	8.87
Average	75.197	0.382168	13.7074	1.86436	0.0801451	0.393398	1.77685	3.87338	2.72533	0.146885	3.05338	27.6758	6.59871		6.66182	2263.64	12.1709	632.909	1.77545	3.208	40.44	15.4909	80.3091	146.682	30.1545	237.273	8.96727	1.65545	3.538	759.273	23.5636	46.7727	5.38727	22.4182	4.67909	0.987727	4.35545	0.757727	4.84727	1.00509	3.01273	0.480909	3.32	0.476364	5.51909	0.593636	1.13	12.6136	7.96
Standard Deviation	0.904092	0.0475852	0.393015	0.264288	0.0217171	0.0608466	0.209991	0.160583	0.147184	0.0233282	1.56791	1.65856	0.193851		1.11474	248.969	1.92818	65.4438	0.363025	1.7976	19.6644	1.80136	10.4002	18.4335	3.49209	29.3908	0.938041	0.328766	0.607706	69.7224	2.26242	5.46134	0.689044	2.54079	0.891633	0.151878	0.916235	0.105134	0.622802	0.133526	0.393779	0.0787064	0.579275	0.11968	0.926579	0.151238	0.195806	2.51674	1.1943
Maketu-P_10	72.942	0.553419	14.278	2.5945	0.085869	0.625228	2.27614	4.14531	2.49948	0.124725	0.0639074	29.1829	6.64479		8.8	2890	12.6	940	1.84	2.96	29.5	19.6	79	196	42.4	298	10.8	1.96	2.66	782	27.4	51.8	5.97	29	6.14	1.45	6.15	1.05	7.6	1.33	4.2	0.76	4.27	0.553	7.38	0.72	1.13	13.9	7.6
Maketu-P_22	73.4287	0.464543	14.2308	2.28529	0.0983164	0.507447	2.055	4.47348	2.45636	0.18707	1.32789	29.8933	6.92984
Average	73.1854	0.508981	14.2544	2.43989	0.0920927	0.566337	2.16557	4.30939	2.47792	0.155898	0.695897	29.5381	6.78731		8.8	2890	12.6	940	1.84	2.96	29.5	19.6	79	196	42.4	298	10.8	1.96	2.66	782	27.4	51.8	5.97	29	6.14	1.45	6.15	1.05	7.6	1.33	4.2	0.76	4.27	0.553	7.38	0.72	1.13	13.9	7.6
Standard Deviation	0.34416	0.0628445	0.0333935	0.218641	0.00880162	0.0832838	0.156367	0.232052	0.0304888	0.0440841	0.893768	0.502333	0.201564
Tahuna-P_1	78.2165	0.115233	12.481	1.01713	0.0262857	0.0902914	0.828757	3.38251	3.84226	0.191186	5.09807	20.3569	7.22478		4.01	840	1.59	470	0.98	3.89	43.1	26.4	161	61.6	29.4	116	9.8	2.82	9.1	900	31	60.6	7.1	23.9	5.8	0.57	4.23	0.74	4.45	0.91	3.49	0.45	3.9	0.53	3.37	1.06	1.63	21.3	15.9
Tahuna-P_2	78.9145	0.163866	11.886	0.965843	0.0144595	0.133566	0.908216	3.18147	3.83202	0.166325	4.15476	20.5934	7.0135		4.32	1050	3.62	369	1.08	2.81	31.1	25.1	165	68	19.7	121	8.1	1.75	11.1	830	26.6	51.2	5.15	16.7	3.08	0.56	3.38	0.4	2.58	0.68	1.31	0.39	2.11	0.47	3.28	0.88	1.83	17.8	17.1
Tahuna-P_3	77.5942	0.15445	12.6314	1.01579	0.0560991	0.144496	1.02548	3.21041	4.16768	0.143552	2.83114	18.6181	7.37809		4.7	1080	3.71	415	1.56	4.09	28.1	29.2	183	79	21.3	130	8.4	2.88	11.8	940	28.1	54.5	5.31	19.2	3.53	0.53	3.21	0.52	2.84	0.95	2.66	0.339	2.54	0.4	3.64	0.97	2.22	21.4	16.6
Tahuna-P_5	77.7209	0.132914	12.5594	0.969085	0.0199698	0.163639	1.08252	3.3173	4.03417	0.168397	2.84257	19.2657	7.35147		4.53	1120	3.17	415	1.7	2.89	18	28.3	182	82	21	136	9.1	2.39	9.3	910	28	53.9	5.6	19.8	3.53	0.401	3.3	0.401	2.62	0.52	2.51	0.336	2.61	0.411	3.65	0.78	2.22	19	16.8
Tahuna-P_6	78.027	0.129657	12.5062	0.900155	0.0562511	0.119319	0.819012	3.61386	3.82845	0.19589	3.09364	20.3808	7.44231		3.8	870	1.79	508	0.79	6.6	19	25.6	142	49.9	19.1	96	8.3	2.88	8.1	917	26.9	52.9	5.79	18.2	3.46	0.4	3.8	0.38	2.96	0.79	2.25	0.339	2.51	0.52	3.64	1	1.48	17.7	13.2
Tahuna-P_7	77.9333	0.130598	12.5056	0.9493	0.0247395	0.094628	0.775201	3.52581	4.0608	0.204142	2.90122	19.1916	7.58661		3.25	707	2.01	447	0.51	4.2	15.4	18.9	77.8	53	16	76.8	7.13	1.57	3.8	872	21.4	41.2	4.06	15.2	2.91	0.51	2.77	0.46	2.55	0.52	1.84	0.266	2.48	0.42	2.49	0.612	0.56	11	7.58
Tahuna-P_8	77.956	0.147685	12.7126	0.8197	0.0397412	0.155967	0.825142	4.16462	3.17851	0.195854	4.68233	24.526	7.34313		4.14	810	2.27	424	0.62	2.33	28.8	19.6	91	62.3	18.6	88	8.1	1.5	4.24	940	21.5	45.4	4.76	16.5	3.58	0.55	2.91	0.49	2.83	0.62	2.35	0.33	2.25	0.38	2.35	0.66	1.26	10.8	8.9
Tahuna-P_9	78.5841	0.168591	12.0338	0.882449	0.0937213	0.0886956	0.665704	3.59915	3.88379	0.14764	3.39068	20.2339	7.48294		4.78	1030	4	629	1.21	4	27.3	23.4	117	47	23.8	104	9.3	1.9	5.9	1110	29.2	55	6.5	21.2	4.9	0.54	3.65	0.66	4.15	0.81	1.86	0.38	3.4	0.45	2.71	1.03	1.17	15.8	10.9
Tahuna-P_10	78.4889	0.130834	12.522	0.898025	0.0606098	0.152652	0.861635	3.58989	3.29543	0.190023	3.9651	23.8175	6.88532		4.76	1040	3.59	560	0.97	3.26	24.8	19.4	114	69	20.7	103	9.1	1.95	5.2	1140	28.1	56.5	6.2	22.6	3.52	0.55	3.28	0.47	2.97	0.52	2.62	0.46	3.09	0.412	2.74	0.77	1.31	11.6	10.3
Tahuna-P_11	78.3029	0.136681	12.5546	0.834951	0.0326598	0.140611	0.798557	3.86587	3.33312	0.184279	3.81752	23.4924	7.19899
Tahuna-P_12	78.414	0.0956697	12.5493	0.950224	0.0855942	0.130032	0.893322	3.64157	3.24031	0.207425	3.9324	24.1996	6.88187		3.5	760	2	480	0.86	7.8	26	10.1	87	58	17.3	80	7.1	0.65	3.8	810	21.2	37	3.9	16.9	2.2	0.8	2.4	0.35	2.9	0.56	2	0.28	1.34	0.17	1.4	0.58	0.9	8.8	7.7
Tahuna-P_13	78.3847	0.117665	12.6704	0.911716	0.0506156	0.14901	0.889034	3.61849	3.20838	0.201098	5.08174	24.4312	6.82687		4.15	840	1.42	472	1.04	3.05	34.1	13.6	176	57.4	22.5	98	10.3	3.64	10.7	980	31	62	6.1	21.9	3.05	0.436	2.9	0.53	3.38	0.86	2.59	0.39	2.68	0.37	3.9	1.21	1.81	21.4	17.6
Tahuna-P_14	77.9195	0.139886	12.6757	1.05062	0.0260824	0.166233	0.972253	3.00178	4.04795	0.161196	4.35826	19.2491	7.04973		5.12	1100	3.45	307	1.64	1.4	30.6	12.2	180	74	21.8	123	7.41	2.35	11.9	817	27.4	50.1	4.96	18.2	3.37	0.36	3.4	0.45	2.96	0.66	1.87	0.317	1.63	0.358	3.89	0.86	1.74	18	14.8
Tahuna-P_15	77.8738	0.0685144	12.5207	0.971772	0.0286375	0.0426664	0.718445	3.61259	4.16288	0.172292	3.21294	18.7067	7.77547
Tahuna-P_16	78.1374	0.152349	12.5369	0.973905	0.0323908	0.149033	0.864842	3.77781	3.37532	0.18925	3.01875	23.1497	7.15313
Tahuna-P_17	77.9598	0.100403	12.4339	0.936837	0.0701291	0.105199	0.789048	3.25036	4.35433	0.188658	3.82645	17.904	7.60468		3.18	720	1.68	416	0.81	3.1	25.8	11.7	152	48.7	19.3	81	8.7	1.87	9.6	860	27.4	50.1	4.72	18	3.2	0.49	3.14	0.36	2.87	0.62	1.77	0.38	2.95	0.33	2.99	1.06	2.05	20.6	15.4
Tahuna-P_18	78.3772	0.120028	12.5832	0.896695	0.0519935	0.139866	0.81431	3.588	3.42869	0.179248	4.04326	22.8592	7.01669
Tahuna-P_19	78.2639	0.115578	12.4756	0.928766	0.0425121	0.0950068	0.865329	3.19847	4.01488	0.191934	4.37507	19.4935	7.21334		3.57	890	2.95	262	1.26	4.01	18.6	10.3	147	62	19.6	107	6.8	2.23	10.3	760	23.5	43.8	4.62	14.7	2.8	0.41	2.73	0.46	2.16	0.48	2.02	0.23	1.9	0.262	3.77	0.7	1.68	16.6	13.3
Tahuna-P_20	78.2087	0.140185	12.5719	0.991394	0.03551	0.152282	0.856356	3.78468	3.25898	0.189562	3.73191	23.9979	7.04366		3.29	750	1.68	428	1.02	2.42	31.4	13.1	160	50.5	23.3	95	10	2.8	11.1	950	30	58.1	5.9	18.2	3.1	0.354	2.52	0.57	3.26	0.62	2.27	0.34	2.13	0.33	3.7	1.17	2.02	21.4	16.5
Tahuna-P_21	78.1459	0.111164	12.4516	1.08106	0.0252234	0.0856385	0.722618	3.17078	4.20601	0.204832	4.76397	18.5796	7.37678
Tahuna-P_22	78.1985	0.124572	12.3684	0.920202	0.0499452	0.0912265	0.758019	3.16615	4.32294	0.164635	3.80756	18.0892	7.48909		3.45	716	1.92	409	0.59	1.22	25.1	10.2	85	58.5	19.6	80	7.2	1.48	4.05	900	21.8	41.9	4.47	14.7	2.8	0.42	2.5	0.45	2.76	0.54	1.58	0.261	1.92	0.282	2.45	0.61	1.31	12.1	8.1
Tahuna-P_24	77.6575	0.163628	12.6387	1.04225	0.0267537	0.134527	1.04957	3.28729	3.9998	0.15944	3.30486	19.4153	7.28709
Tahuna-P_25	78.243	0.1469	12.5706	1.03518	0.0761678	0.129282	0.885948	3.643	3.2699	0.203569	4.17321	23.9282	6.91291		4.32	900	3.46	506	0.89	4.49	13.8	11.5	95	64.1	24.6	95.5	8.3	1.88	4.72	1050	26.3	49.8	5.05	17.8	3.23	0.58	2.8	0.5	3.73	0.75	2.09	0.321	2.88	0.397	3.01	0.7	1.08	13.7	9.7
Average	78.1531	0.130741	12.4974	0.954046	0.0446127	0.124081	0.855187	3.4866	3.7542	0.182627	3.8438	21.0643	7.2408		4.05118	895.471	2.60647	442.176	1.03118	3.62118	25.9412	18.1529	136.165	61.4706	21.0353	101.782	8.42	2.14941	7.92412	922.706	26.4353	50.8235	5.30529	18.4529	3.41529	0.497706	3.11294	0.481824	3.05706	0.671176	2.18118	0.341706	2.48941	0.381882	3.11647	0.861882	1.54529	16.4118	12.9635
Standard Deviation	0.310438	0.0239343	0.189391	0.0676498	0.0216629	0.0316846	0.104216	0.280846	0.407838	0.0187145	0.692111	2.38042	0.259607		0.608799	146.064	0.906993	86.6727	0.35201	1.65346	7.41401	7.00822	38.1246	10.3949	3.12509	18.2868	1.07489	0.712956	3.11097	103.016	3.34812	7.04765	0.876685	2.71042	0.824433	0.109494	0.494934	0.10286	0.585585	0.148487	0.507702	0.0627871	0.645179	0.0910102	0.689583	0.204274	0.470759	4.30928	3.67435
Ngamotu-Unit B-P_1	76.3013	0.325611	13.8946	0.644549	0.0504104	0.0312939	1.56765	4.33209	2.8525	0.143059	1.02966	26.7489	7.18459		4.33	1683	6.91	591	0.89	1.4	47.1	13.8	77.8	151.5	22.4	191	8.11	1.57	2.7	780	20.2	42.2	4.98	19.5	4.39	0.91	4.06	0.64	3.56	0.72	2.29	0.328	3.43	0.428	5.3	0.62	1.08	11.8	7.39
Ngamotu-Unit B-P_2	76.8507	0.182392	13.2815	1.19742	0.0682189	0.189005	1.1042	4.15719	2.96936	0.153817	1.13348	25.8812	7.12656		3.67	1635	6.95	590	1.07	1.86	39.3	12.78	63.6	143.5	20.9	169.8	6.89	1.26	2.44	713	18.4	37.5	4.18	16.3	3.8	0.93	3.06	0.507	3.07	0.68	2.46	0.36	2.68	0.443	4.29	0.578	1.01	10.01	7.02
Ngamotu-Unit B-P_3	74.6296	0.40243	14.3922	1.90026	0.110513	0.526218	2.20274	3.42036	2.41564	0.141272	7.20191	30.8943	5.83601		4.32	1200	1.73	604	0.28	Below LOD	56.2	14.7	90	115	31.4	157	9.93	1.79	2.62	838	25.7	54.5	6.22	24.8	5.2	1	5.49	0.83	5.51	1.12	3.25	0.519	3.54	0.56	4.63	0.72	1.24	14.3	9.4
Ngamotu-Unit B-P_5	74.5707	0.435305	13.804	2.02759	0.128073	0.633772	1.97143	4.02853	2.40067	0.128986	4.05431	31.0624	6.4292		4.89	2350	11.71	736	1.26	0.98	25.3	16.31	79.2	196	27.7	210.7	8.52	1.93	2.76	805	22	44.8	5.23	22.6	4.47	1.08	4.87	0.692	4.68	0.862	2.64	0.468	3.54	0.544	5.3	0.57	0.97	11.23	7.37
Ngamotu-Unit B-P_6	77.9301	0.230543	12.5471	1.17694	0.0597643	0.198223	1.17979	3.72766	2.94994	0.134606	2.60646	26.4175	6.67761		4.09	1985	9.56	626	1.11	Below LOD	44.7	15.6	61.4	180.1	20.5	159	6.7	1.41	1.56	665	18	36.9	4.07	16.3	2.91	0.85	2.92	0.488	3.04	0.77	2.19	0.303	2.29	0.372	3.83	0.484	0.93	10.75	5.77
Ngamotu-Unit B-P_7	77.6653	0.185966	12.6259	1.16304	0.107237	0.169231	1.09064	3.925	3.06771	0.162308	1.78227	25.317	6.99271		4.38	1470	8.31	375	1.5	1.87	34.7	12.01	84.4	98.7	18.9	152.2	7.47	1.73	3.8	834	20.46	40.3	4.57	16.99	3.58	0.64	2.69	0.49	3.45	0.67	1.99	0.328	2.48	0.42	3.29	0.65	1.14	12	8.5
Ngamotu-Unit B-P_8	75.6237	0.32118	13.737	1.49918	0.129904	0.362361	1.72683	4.01995	2.5799	0.147461	2.56208	29.3126	6.59985		5.24	1170	1.73	606	0.35	5.8	22.2	17.1	99.7	101	30.6	151	9.5	2.4	3.96	895	26.3	54.8	6.17	26	5.3	0.96	4	0.83	4.56	0.909	2.86	0.51	3.41	0.54	4.31	0.73	0.94	15.8	9.3
Ngamotu-Unit B-P_9	76.8591	0.320019	13.6112	1.26744	0.0707621	0.181527	1.57423	3.40298	2.71276	0.192329	7.29813	28.3324	6.11574		4.25	1752	7.16	645	0.96	1.99	23	14.26	78.6	153.3	22.2	191.6	7.88	1.97	2.92	801	21.5	43.7	5.08	19.5	4.17	0.85	3.89	0.59	3.72	0.753	2.67	0.368	2.99	0.431	5.18	0.59	0.86	10.45	7.17
Ngamotu-Unit B-P_11	74.5917	0.371456	14.2904	1.73834	0.0725396	0.530649	2.11198	3.91859	2.37435	0.141631	4.47497	31.4156	6.29294		3.78	1638	7.1	694	1.08	1.41	51.4	13.92	70	140.1	23.4	184.5	7.87	1.58	2.16	760	20.5	42.1	4.53	20	4.54	0.87	3.57	0.528	3.42	0.76	2.49	0.368	2.83	0.438	4.43	0.55	1.07	10.31	7.22
Ngamotu-Unit B-P_14	76.6482	0.276561	13.2702	1.30214	0.0694566	0.262201	1.47526	3.89756	2.79841	0.172604	1.56505	27.39	6.69596		4.99	2280	11.45	746	1.31	1.93	59.7	15.34	73.4	193	27.5	211	8.19	1.61	2.7	798	22.1	45.2	5.2	22.3	4.5	0.94	5.16	0.774	4.37	0.822	2.79	0.501	3.54	0.524	5.4	0.68	0.96	11.7	7.48
Ngamotu-Unit B-P_15	75.3117	0.37045	14.14	1.6494	0.099377	0.421091	1.97403	3.70397	2.32995	0.144082	6.09979	32.3233	6.03392		6.15	4187	92.2	589	20.45	38.4	64.4	23.01	31.6	478	12.05	121.2	6.62	2.84	1.99	300.8	11.69	25.96	2.8	12.91	2.9	0.87	2.56	0.371	2.22	0.419	1.33	0.149	0.96	0.137	2.97	0.399	0.65	10.94	2.36
Ngamotu-Unit B-P_16	75.564	0.470686	13.3062	1.77027	0.0912876	0.339303	1.66159	3.98159	2.81506	0.12326	3.85144	26.8427	6.79666		5.92	4042	92.2	593	20.03	36.4	63.9	23.1	30.2	487	11.72	117.8	6.56	2.58	2.03	302.2	11.93	24.9	2.82	12.75	2.51	0.82	2.57	0.412	2.28	0.433	1.07	0.163	1.56	0.202	3.21	0.402	0.63	11.5	2.28
Ngamotu-Unit B-P_17	75.6131	0.389647	13.4915	1.74909	0.0722994	0.442718	1.74596	3.87283	2.62285	0.149916	4.15755	28.8286	6.49568		4.81	1596	5.38	603	0.84	1.5	26.8	14.18	81.1	125.5	29.7	206	8.93	1.81	2.97	844	23.5	50.7	5.73	24.6	4.75	0.99	5.19	0.78	4.73	0.94	3.23	0.47	3.86	0.516	5.15	0.76	1.03	11.83	8.27
Ngamotu-Unit B-P_18	74.683	0.423249	14.2023	1.75837	0.0730709	0.494255	2.12637	3.83621	2.4031	0.13935	5.16958	31.0778	6.23931		5.01	2011	9.53	714	1.23	1.26	57.9	16.3	79.8	168.9	27	207	7.58	1.88	2.91	800	21.6	45.9	5.06	21.4	4.55	1.07	4.2	0.645	4.48	0.9	2.7	0.428	3.03	0.548	5.73	0.635	1.12	12.02	7.71
Ngamotu-Unit B-P_19	74.4804	0.425386	14.1869	1.8258	0.088339	0.545621	2.16711	3.85924	2.42115	0.147662	4.82561	30.7624	6.28039		4.61	1950	8.95	720	2.96	4.35	54	19.4	69.1	161	21.3	172	7.43	1.22	2.11	723	18.2	54.7	4.27	18.3	3.74	0.86	3.42	0.588	3.41	0.78	2.34	0.36	2.83	0.483	4.23	0.53	1.27	14.3	6.42
Ngamotu-Unit B-P_20	75.3794	0.316697	13.9377	1.59755	0.0638014	0.394691	1.83871	3.91641	2.55502	0.132253	0.080635	29.5025	6.47143		4.6	2240	11.05	683	1.59	2.5	22.2	14.7	66.5	178	22.9	181	7.16	1.45	2.01	659	18.6	40.3	4.76	19.2	3.74	0.89	3.86	0.583	3.79	0.8	2.5	0.296	2.65	0.4	4.11	0.45	0.79	9.23	6.39
Ngamotu-Unit B-P_21	75.3479	0.34076	13.8107	1.66569	0.121015	0.415254	1.83568	3.93396	2.529	0.122228	3.03966	29.7935	6.46297		5.03	2195	10.39	740	1.58	1.57	49.7	16.07	70.8	181	26.4	205.5	8.06	1.52	2.54	741	20.9	44.9	4.92	21	4.43	1.14	4.25	0.719	4.33	0.824	3.16	0.408	2.89	0.462	5.11	0.56	1.07	11.09	7.4
Ngamotu-Unit B-P_22	75.5692	0.337094	13.6441	1.53857	0.0784655	0.338334	1.77324	4.02254	2.69846	0.136225	0.0855662	28.0046	6.72101		4.73	2015	8.95	707	1.36	2.29	35.6	15.6	78.4	167.8	24.8	203.2	7.58	1.65	2.48	784	21.1	46.4	5.22	20.6	4.19	0.95	4.22	0.657	3.74	0.81	2.79	0.433	3.08	0.55	4.91	0.618	0.98	11.12	7.58
Ngamotu-Unit B-P_23	74.616	0.417779	14.0964	1.83171	0.0976968	0.453963	2.04572	3.8745	2.56624	0.157018	4.48489	29.0759	6.44074
Ngamotu-Unit B-P_25	74.3052	0.366749	14.3392	1.86035	0.0607589	0.465548	2.16473	3.95849	2.47893	0.131372	4.20075	29.9747	6.43743		4.58	1842	7.33	703	1.13	1.13	29.4	15.6	82	163.2	24.6	211	8.24	1.91	3.19	867	23.3	49.8	5.59	20.9	3.85	1.04	3.63	0.636	3.52	0.85	2.81	0.468	2.96	0.474	5.56	0.55	1	12.87	8.37
Average	75.627	0.345498	13.7305	1.55818	0.0856496	0.369763	1.76689	3.88948	2.62705	0.145072	3.48519	28.9479	6.51653		4.70421	2065.32	16.7679	645.526	3.20947	6.27294	42.5	15.9884	71.9789	188.558	23.4721	179.079	7.85368	1.79526	2.62368	732.105	20.3147	43.4505	4.81053	19.7868	4.08	0.929474	3.87421	0.618947	3.78316	0.780105	2.50316	0.380421	2.87105	0.445895	4.57579	0.582947	0.986316	11.75	7.02105
Standard Deviation	1.0852	0.0797717	0.524624	0.338013	0.023866	0.15547	0.351336	0.21292	0.220872	0.0168643	2.13174	2.02311	0.347531		0.628864	795.666	26.7247	87.86	6.02694	11.7839	14.8784	2.96834	17.106	107.368	5.3921	29.6243	0.925216	0.425563	0.606101	164.121	3.76475	8.31219	0.923168	3.64248	0.746481	0.113357	0.887163	0.133176	0.839517	0.160991	0.570312	0.105482	0.70573	0.113028	0.826218	0.102948	0.168761	1.61197	1.89162
Rotoehu-P_1	78.333	0.13063	12.523	0.914348	0.0620505	0.140838	0.844691	3.65949	3.39193	0.159583	4.70597	23.0939	7.05143		5.23	2420	11.79	814	1.38	2.84	53.4	16.9	82.4	193	28.9	225	9.04	1.92	2.78	863	24.2	49.2	5.79	23.8	4.09	1.28	4.51	0.71	5.1	1.01	3.17	0.453	3.67	0.567	5.29	0.73	1.27	12.53	8
Rotoehu-P_2	78.4165	0.150355	12.4828	0.930519	0.0200601	0.120616	0.855529	3.68769	3.33584	0.189761	3.27977	23.5073	7.02354		5.23	2420	12.3	814	1.52	2.68	38.9	18.8	81.4	200	28.5	217	8.77	1.89	2.79	833	23	47.9	5.49	22.1	4.65	1.08	5.05	0.87	4.3	1.05	3.18	0.459	3.44	0.546	5.44	0.6	1.18	13.3	7.54
Rotoehu-P_3	78.3965	0.125009	12.6412	0.899696	0.0722887	0.130319	0.805546	3.56765	3.36182	0.149894	4.14347	23.3197	6.92947
Rotoehu-P_5	78.4147	0.15724	12.538	0.868347	0.0600165	0.133044	0.845503	3.6847	3.29837	0.17911	4.55526	23.7738	6.98307
Rotoehu-P_6	78.307	0.176619	12.5685	0.900878	0.0307427	0.142776	0.81996	3.67517	3.37835	0.139591	3.83013	23.1791	7.05351		4.11	827	2.55	473	0.55	2.4	34.9	14.9	100.9	61.5	22.5	94.3	8.23	2.43	2.5	1050	25.5	51.8	5.11	19.6	3.7	0.53	3.35	0.59	3.11	0.71	2.23	0.37	2.86	0.415	2.86	0.66	1.05	11.8	10.6
Rotoehu-P_7	78.459	0.126371	12.5489	0.969966	0.0424594	0.141255	0.820401	3.45121	3.44041	0.159929	4.25628	22.8051	6.89163		4.42	1030	2.99	720	1.11	2.5	35	14.9	106	69.1	23.2	98.5	10.2	1.48	3.21	1190	28.6	60.2	5.77	21.4	3.92	0.55	3.28	0.56	4.11	0.8	2.19	0.54	3.25	0.55	2.84	0.92	1.45	20.8	11.2
Rotoehu-P_8	78.1402	0.140431	12.5409	0.950979	0.0305025	0.13953	0.811439	3.71127	3.53474	0.144992	3.07266	22.1064	7.24601		3.95	864	2.3	461	0.81	1.55	30.9	13.6	97.9	62.2	20.1	89.2	7.74	2.36	4.5	1077	25.4	50.8	5.23	18.8	4.07	0.64	3	0.59	3.38	0.61	1.96	0.42	2.15	0.339	2.79	0.73	1.57	12.5	9.7
Rotoehu-P_9	78.2576	0.136397	12.6568	0.890353	0.0357846	0.118877	0.798656	3.70658	3.39894	0.17456	4.47056	23.0241	7.10552		4.81	1080	3.29	559	1.41	Below LOD	34.5	18.8	125	73.1	24.9	115	10.4	3.03	5.3	1270	31.4	64.9	7.07	23.4	4.5	0.68	4.1	0.63	3.58	0.94	1.93	0.48	2.55	0.54	4.09	0.85	1.49	16.8	12.5
Rotoehu-P_10	78.7781	0.133206	12.5397	0.802975	0.0317359	0.12358	0.787756	3.19803	3.60496	0.184492	3.92872	21.8527	6.80299		4	880	2.07	476	0.92	3.2	15.6	14.3	96	64	19.2	87	8.4	1.66	4	990	22.5	45.2	5.24	18.9	4.1	0.42	3.6	0.54	3.45	0.66	1.78	0.28	3.1	0.4	2.17	0.6	1.42	13.7	9.2
Rotoehu-P_11	78.0703	0.140107	12.5974	0.978879	0.050491	0.166123	0.811506	3.73866	3.44651	0.153901	1.18767	22.652	7.18517		4.01	820	2.39	436	1	3	31.2	12	107	60	19.4	89	8.2	1.82	2.96	1060	24.3	51	5.9	17.7	3.6	0.5	3.7	0.55	3.37	0.76	2.02	0.254	2.06	0.33	3.03	0.72	1.29	14.1	8.8
Rotoehu-P_12	78.0252	0.15187	12.5531	0.936539	0.0612618	0.125143	0.859418	3.76615	3.52123	0.168421	3.47904	22.1585	7.28737		3.92	930	2.71	466	0.71	Below LOD	33.6	14.5	102	62.9	20.7	94.3	8.83	1.41	3.6	1060	25.2	50.7	5.34	20.1	3.6	0.77	3.8	0.54	4.1	0.67	2.28	0.39	2.75	0.4	2.65	0.76	1.37	13.5	10.6
Rotoehu-P_13	78.5252	0.162661	12.6036	0.890565	0.0308486	0.140036	0.861251	3.51428	3.2715	0.151014	4.16014	24.0028	6.78578		3.1	743	1.49	406	0.71	5.4	17.4	13	96	49.5	19.2	85.2	8.08	2.04	4.17	990	22.6	45.5	5.07	19.6	3.3	0.44	2.52	0.48	2.67	0.58	1.81	0.31	2.4	0.4	2.35	0.6	1.84	13.3	9.6
Rotoehu-P_15	78.272	0.145347	12.4651	0.947304	0.0423238	0.139729	0.800721	3.78556	3.40191	0.171429	3.94953	23.0083	7.18747		4.18	853	2.58	432	0.87	2.11	23.9	12.7	96.1	63.2	20.1	88.6	8.34	1.3	3.4	1076	25	48	5.14	20	3.28	0.66	3.74	0.52	3.53	0.74	2.29	0.37	2.93	0.44	2.94	0.71	1.47	12.1	9.84
Rotoehu-P_16	78.3166	0.137264	12.614	0.87313	0.0611983	0.145315	0.83733	3.64749	3.36764	0.151964	3.37902	23.2557	7.01513
Rotoehu-P_17	78.2216	0.147842	12.5173	0.950285	0.0210002	0.134395	0.804126	3.7891	3.41435	0.161451	3.21005	22.9097	7.20345		4.25	861	2.45	471	0.85	2.14	29.7	14.5	101	62.3	20.3	93	8.34	1.73	3.55	1070	26.3	51.9	5.24	20.3	3.56	0.56	3.2	0.46	3.54	0.74	1.84	0.332	2.29	0.481	2.48	0.75	1.28	13.3	10.3
Rotoehu-P_18	78.0483	0.140219	12.6105	0.980103	0.0561537	0.14889	0.832364	3.72469	3.4588	0.164219	2.92567	22.5651	7.18349		5.33	1030	2.57	541	0.71	Below LOD	41.4	16.5	120	77	25.5	111	9.5	1.7	4.8	1230	30.3	60.9	6.5	24.1	3.4	0.64	4.6	0.59	3.61	0.88	2.38	0.39	2.6	0.46	3.8	0.82	1.82	13.8	12.1
Rotoehu-P_19	78.1996	0.159086	12.4645	0.993465	0.0683944	0.11676	0.805488	3.75361	3.43904	0.172529	2.73805	22.7388	7.19265		4.12	774	2.29	436	0.66	2.38	33.3	12.9	95	56.4	19.3	88	8.2	1.57	3.46	1030	23.8	47.3	4.72	18	3.5	0.45	2.37	0.45	2.59	0.6	1.92	0.25	2.49	0.46	2.23	0.65	1.1	12	9.3
Rotoehu-P_20	78.2942	0.118702	12.5993	0.837863	0.0485625	0.110656	0.787372	3.70454	3.49877	0.142679	2.97139	22.3777	7.20331
Rotoehu-P_22	78.4656	0.0996288	12.4966	0.885174	0.0472796	0.130459	0.874864	3.55413	3.44621	0.162104	4.24678	22.7687	7.00033
Rotoehu-P_24	78.3187	0.139658	12.4974	0.886345	0.07649	0.117522	0.863738	3.73891	3.36121	0.182338	3.36903	23.3007	7.10012
Rotoehu-P_25	78.0941	0.149013	12.5802	0.893896	0.0543981	0.134367	0.830402	3.85701	3.40655	0.148417	3.18953	22.9247	7.26356
Average	78.3026	0.141317	12.5542	0.91341	0.0478116	0.133344	0.826574	3.66266	3.41805	0.162494	3.57375	22.9202	7.08071		4.33286	1109.43	3.84071	536.071	0.943571	2.74545	32.4071	14.8786	100.479	82.4429	22.2714	112.507	8.73357	1.88143	3.64429	1056.36	25.5786	51.8071	5.54357	20.5571	3.805	0.657143	3.63	0.577143	3.60286	0.767857	2.21286	0.378429	2.75286	0.452	3.21143	0.721429	1.4	13.8236	9.94857
Standard Deviation	0.180003	0.0166549	0.0559921	0.0489671	0.0165946	0.013009	0.0265549	0.143918	0.078879	0.0144478	0.801579	0.534864	0.146264		0.621195	563.747	3.5017	141.153	0.304166	0.992163	9.50461	2.15199	11.913	48.794	3.42736	46.8105	0.797965	0.464342	0.820869	121.369	2.74624	5.99839	0.624138	2.09751	0.428912	0.246309	0.764692	0.108516	0.65091	0.150904	0.451177	0.087317	0.483551	0.0772887	1.05943	0.0966243	0.235339	2.35935	1.40795
Rotoiti Ig-P_1	78.3934	0.117334	12.4669	0.87099	0.066284	0.126664	0.851843	3.71621	3.39031	0.190832	3.82301	23.1228	7.10652		4.19	910	2.85	518	0.72	Below LOD	35.7	14.7	105	67.5	21.6	97	8.6	1.77	3.5	1130	26.5	50.5	5.45	17.9	4.4	0.52	4	0.6	3.47	0.76	2.12	0.38	2.9	0.46	2.55	0.79	1.88	13.2	9.4
Rotoiti Ig-P_3	77.9529	0.139181	12.6138	0.989767	0.0259509	0.131027	0.874663	3.88061	3.39209	0.204025	3.87349	22.9808	7.2727		4.06	830	1.92	451	0.87	2.9	32.8	14	99	62	20.9	96	8	1.97	3.17	1030	24.6	51.4	5.52	20.8	3.9	0.35	4.2	0.382	3.3	0.77	2.13	0.27	2.79	0.34	3.2	0.66	1.51	11.4	10.1
Rotoiti Ig-P_4	78.0601	0.134119	12.4774	0.988141	0.0201508	0.117945	0.883862	3.86464	3.45362	0.211315	3.7153	22.6024	7.31826		4.63	940	2.39	473	0.92	2.85	17.6	14.6	114	65.8	20.9	97	9	1.91	3.51	1140	26.8	52.8	5.86	22.5	3.58	0.55	3.9	0.53	3.06	0.72	2.18	0.36	2.73	0.355	2.91	0.96	1.56	13.2	10.3
Rotoiti Ig-P_7	78.1731	0.155992	12.4466	0.881653	0.0832332	0.149241	0.8668	3.83694	3.40645	0.261474	4.53743	22.9485	7.24339		3.87	790	1.86	398	0.55	1.53	34.1	12	94	61.9	21.3	88	8.02	1.48	4.1	1010	23.3	45.8	4.5	18.2	3.57	0.42	3.47	0.52	3.06	0.66	2.15	0.312	2.77	0.48	2.66	0.63	1.27	12.4	9.9
Rotoiti Ig-P_9	78.5539	0.116603	12.6377	0.878709	0.0173627	0.127186	0.879944	3.6582	3.13038	0.203663	4.21766	25.094	6.78858		4.45	1040	2.56	521	0.7	4.5	27.3	17	126	75.7	24.8	107	10.7	2.3	4.3	1310	30.3	60	6.4	25.6	4.6	0.65	3.4	0.48	3.07	0.6	2.54	0.38	2.87	0.4	3.3	0.8	1.69	16.8	11.8
Rotoiti Ig-P_10	78.1532	0.145696	12.5465	1.00417	0.0535497	0.150661	0.841588	3.86658	3.23803	0.207327	3.38119	24.136	7.10461		4.33	940	2.6	521	0.72	3.9	18.5	15	105.5	66.7	21.1	101	9.3	1.29	3.7	1150	27.8	56.8	6.04	21.6	3.53	0.61	3.52	0.395	3.27	0.77	2.45	0.39	2.63	0.349	3.06	0.83	1.25	13.3	11.1
Rotoiti Ig-P_11	78.2924	0.156023	12.6442	0.835922	0.100854	0.128795	0.868771	3.70421	3.26878	0.185357	3.81094	23.9516	6.97299
Rotoiti Ig-P_12	78.3844	0.161489	12.5865	0.869122	0.0424279	0.138995	0.855064	3.60585	3.35613	0.199216	4.18525	23.3556	6.96198
Rotoiti Ig-P_14	78.3101	0.149199	12.5697	0.840802	0.0468218	0.129196	0.847328	3.72136	3.3855	0.198499	3.31057	23.131	7.10686
Rotoiti Ig-P_15	78.3308	0.134723	12.457	0.906011	0.0773775	0.131295	0.867208	3.68974	3.4058	0.214708	3.28333	22.9992	7.09554		4.57	940	2.61	493	1.05	Below LOD	Below LOD	16.6	118	70.2	20.7	101	8.9	2.45	4.66	1120	26.2	54.9	5	19.7	3.84	0.61	3.3	0.453	3.54	0.56	1.9	0.29	2.13	0.31	3.11	0.78	2.01	15.8	10.2
Rotoiti Ig-P_16	78.5407	0.155967	12.4772	0.901403	0.0537697	0.165227	0.900387	3.57132	3.23403	0.18529	3.77636	24.2857	6.80536		3.05	691	1.81	376	0.7	Below LOD	Below LOD	12.9	79.7	52.4	16.8	72.6	6.99	1.63	3.49	870	20.1	42.7	4.19	16.6	2.98	0.38	2.72	0.343	2.56	0.53	1.63	0.253	2.23	0.345	2.21	0.55	1.13	11.7	7.96
Rotoiti Ig-P_17	78.301	0.138835	12.5875	1.01564	0.0744717	0.149139	0.872639	3.5509	3.30985	0.195423	4.47204	23.657	6.86075		4.7	860	2	395	0.49	Below LOD	Below LOD	12.3	83	51.1	15.2	76	7	1.22	2.6	840	20.6	40.1	3.79	13.4	2	0.44	1.13	0.36	2.41	0.4	1.43	0.24	2.1	0.29	2.4	0.53	0.53	10.6	8.3
Rotoiti Ig-P_18	78.1228	0.148734	12.5978	0.900502	0.0643407	0.140571	0.880291	3.74567	3.39932	0.177686	3.78998	22.9819	7.14499		4.13	830	2.34	397	1.5	4.5	10.7	11.9	100	63.4	19.6	88	7.9	1.26	3.61	990	23.4	45.6	4.6	17.7	3.42	0.3	2.52	0.49	2.95	0.73	2.02	0.25	2.75	0.26	2.88	0.48	1.32	12.1	7.7
Rotoiti Ig-P_19	78.3076	0.13761	12.595	0.855125	0.040619	0.114551	0.854373	3.75772	3.33735	0.210783	4.46744	23.464	7.09507		3.67	829	2.38	425	1	Below LOD	Below LOD	14.7	98	58.5	16	76.9	7.8	1.54	3.1	947	21.5	46	4.58	16.3	3.2	0.44	1.8	0.37	2.79	0.52	1.31	0.17	2.56	0.28	1.65	0.39	1.12	11.3	7.57
Rotoiti Ig-P_21	78.3072	0.100114	12.9902	0.744695	0.0377654	0.0444204	1.03219	3.09913	3.64432	0.10943	7.03471	21.4875	6.74345		3.46	840	2.04	420	0.66	Below LOD	22.5	13.1	93	61.1	19.8	90	7.91	1.58	4.03	970	23.3	46.9	4.85	17.9	3.35	0.37	3.5	0.47	2.99	0.62	1.84	0.313	2.53	0.275	2.49	0.7	1.31	10.5	9.3
Rotoiti Ig-P_22	78.3421	0.163194	12.3594	0.912118	0.0986519	0.134011	0.909098	3.77148	3.30988	0.192131	4.47306	23.6692	7.08136		3.89	900	2.87	485	0.93	1.99	26.2	13.2	101	66.1	19.1	88.2	8.7	1.81	3.77	1080	24.5	49.3	5.1	19.5	3.82	0.49	2.9	0.5	2.75	0.55	1.66	0.35	2.6	0.25	1.91	0.57	0.82	11	9.4
Rotoiti Ig-P_23	78.2669	0.149411	12.6438	0.726873	0.055838	0.16267	0.824499	3.88122	3.28871	0.200341	7.3406	23.7987	7.16993		3.69	830	2.81	465	0.56	0.91	22.4	14.7	96	66.5	20	91	8.2	2.17	3.35	1030	24.8	49.6	4.97	18.4	3.7	0.52	3.25	0.53	3.13	0.76	1.95	0.261	2.42	0.33	2.69	0.78	0.84	12.1	9.3
Rotoiti Ig-P_24	78.132	0.154537	12.4262	1.07951	0.0313952	0.161586	0.884751	3.60709	3.52291	0.20411	2.88597	22.1783	7.12999		4.69	870	12.6	402	1.37	7.9	20.6	19.4	148	76	17	76	7.1	1.33	4.9	1240	31.3	50.8	6.2	23.7	4.03	0.85	2.59	0.409	2.82	0.57	1.78	0.242	1.8	0.31	2.46	0.63	1.16	17.5	7.5
Rotoiti Ig-P_25	78.423	0.124742	12.5318	0.949253	0.0192358	0.128966	0.852866	3.60332	3.36687	0.199796	3.9384	23.2926	6.97019		4.35	1020	2.23	501	0.67	Below LOD	36.6	15.5	111	71.1	23	101	10.1	2	3.7	1200	28.6	56.6	5.91	22.8	4.6	0.74	2.87	0.5	3.48	0.76	2.23	0.294	3.08	0.35	2.95	0.83	1.78	13.3	10.5
Average	78.2815	0.141237	12.5608	0.902653	0.0531632	0.133271	0.876219	3.69117	3.36002	0.197442	4.2272	23.323	7.05119		4.10813	878.75	2.99187	452.562	0.838125	3.44222	25.4167	14.475	104.45	64.75	19.8625	90.4188	8.38875	1.73187	3.71813	1066.06	25.225	49.9875	5.185	19.5375	3.6575	0.515	3.06687	0.45825	3.04062	0.6425	1.9575	0.297187	2.55562	0.3365	2.65187	0.681875	1.32375	12.8875	9.39562
Standard Deviation	0.15388	0.0169744	0.132753	0.0885227	0.0256903	0.0260424	0.042926	0.179099	0.112303	0.0274036	1.13771	0.794186	0.163513		0.477455	86.9088	2.58623	50.9077	0.284704	2.09588	8.15317	2.00582	16.6683	7.036	2.56382	10.5255	1.05073	0.380652	0.582629	129.584	3.25689	5.41022	0.762216	3.14089	0.642054	0.14922	0.803034	0.0740716	0.32575	0.114688	0.341047	0.0623519	0.341935	0.0656049	0.46132	0.153024	0.403764	2.12474	1.2962
Earthquake Flat-P_1	77.8784	0.128741	12.621	0.961462	0.0146955	0.102368	0.796094	3.1336	4.36368	0.178718	4.08897	17.847	7.49728
Earthquake Flat-P_2	78.1638	0.102946	12.3892	1.00954	0.038531	0.102069	0.775362	3.14987	4.26874	0.19173	3.80832	18.3108	7.41861
Earthquake Flat-P_3	78.0583	0.111997	12.3538	0.963039	0.0521703	0.0908533	0.790531	3.37003	4.2092	0.194254	3.94109	18.5447	7.57923
Earthquake Flat-P_5	77.6016	0.131325	12.5144	1.14256	0.028577	0.110425	0.785422	3.29785	4.3878	0.196096	3.18368	17.6858	7.68566		4.26	900	2.54	475	0.92	1.66	24.4	15.4	109	64.3	19.8	92	8.6	1.75	3.95	1070	24.7	51.7	5.8	19.7	4.32	0.57	3.41	0.46	3.02	0.57	1.91	0.37	2.29	0.36	2.62	0.98	1.32	14.6	10.3
Earthquake Flat-P_6	78.0559	0.0949225	12.4671	0.913116	0.0438181	0.0984377	0.809881	3.26269	4.2541	0.218552	4.69279	18.3484	7.51678
Earthquake Flat-P_7	77.818	0.133254	12.437	1.00807	0.0238435	0.079271	0.804506	3.34825	4.34775	0.195955	3.66758	17.8985	7.696		3.98	858	2.75	477	0.86	1.9	20.6	14.1	96.7	67.5	20.4	90	8.38	2.29	3.75	1060	25.3	49.3	5.57	17.6	3.17	0.46	2.78	0.56	2.95	0.8	2.05	0.291	2.02	0.46	2.56	0.76	1.39	13.4	9.61
Earthquake Flat-P_8	78.0663	0.0925609	12.3392	0.870106	0.0341092	0.104092	0.703317	3.3434	4.44694	0.199156	3.5819	17.5551	7.79033
Earthquake Flat-P_9	78.0022	0.0635603	12.5092	0.907962	0.0287686	0.0725975	0.805851	3.24748	4.3624	0.199666	3.82834	17.8806	7.60988		4.55	950	2.86	533	1.17	3.1	20.7	17.3	126	70	20.9	102	9.5	1.52	4.97	1140	24.1	51	6.09	19.9	2.88	0.57	3.49	0.54	3	0.58	2.08	0.221	2.25	0.42	3.01	0.72	1.89	15.7	10.3
Earthquake Flat-P_10	77.7134	0.109534	12.5263	0.990993	0.030643	0.104481	0.823868	3.30397	4.39678	0.195517	2.89702	17.6751	7.70074		4.45	917	2.76	526	0.99	2	24	15.9	110	70.3	20.9	94	9.6	1.6	3.74	1120	25.7	52	5.09	20.2	4.1	0.6	3.5	0.59	3.25	0.61	1.68	0.28	2.49	0.377	1.77	0.75	1.14	15.2	10
Earthquake Flat-P_11	77.795	0.089064	12.4207	0.908773	0.0124956	0.1124	0.798982	3.36438	4.49819	0.224684	3.91422	17.2947	7.86257		3.88	950	2.3	531	0.72	2.5	15	16.8	102	69.6	21.6	90.1	9.1	2.55	4.12	1140	27.8	53.5	5.66	22.2	4.2	0.66	3.24	0.63	3.7	0.66	1.96	0.277	2.35	0.313	3.01	0.83	0.99	13.7	10.7
Earthquake Flat-P_12	78.0162	0.0801913	12.5424	0.947886	0.032611	0.0636063	0.772204	3.11131	4.43358	0.202188	3.95455	17.5967	7.54489
Earthquake Flat-P_13	78.3964	0.105887	12.396	0.764102	0.039766	0.129776	0.732637	2.99079	4.44462	0.144907	4.17035	17.6385	7.43541		5.09	990	2.6	471	0.63	1.8	21.8	14.3	112.6	72.2	23.2	102.2	9.2	2.37	4.41	1146	25.4	51	5.84	20.1	3.67	0.65	3.24	0.73	Below LOD	0.7	2.74	0.29	2.48	0.53	3.51	1.1	1.39	12.5	10.7
Earthquake Flat-P_14	77.9813	0.137109	12.4005	1.03078	0.0368619	0.0917599	0.822094	3.13133	4.36822	0.19377	3.70125	17.852	7.49955		3.89	860	2.2	470	0.82	1.59	16.8	15	104	62.4	17.1	82	7.58	1.76	3.85	950	22.5	47.9	4.69	17.1	3.68	0.55	2.61	0.45	2.63	0.6	1.63	0.38	1.82	0.35	2.15	0.6	0.66	11	8.5
Earthquake Flat-P_15	77.7034	0.121892	12.5195	0.980092	0.0325298	0.107635	0.798408	3.23707	4.4994	0.197177	3.71469	17.2697	7.73647
Earthquake Flat-P_16	77.6753	0.126777	12.4764	1.0324	0.00324802	0.0972893	0.768027	3.08193	4.73857	0.249752	3.56782	16.3921	7.8205		4.14	890	3.05	550	0.7	1	17.2	17.4	113	62.6	19.6	83	7.9	1.71	4.15	1010	26.7	49.1	5.5	18.9	2.8	0.62	2.6	0.46	Below LOD	0.49	1.87	0.233	2.22	0.285	2.75	0.46	1.66	15.2	10.1
Earthquake Flat-P_17	77.7199	0.0755542	12.5773	0.932686	0.0338746	0.0955106	0.778949	3.24767	4.53853	0.162028	2.91411	17.1245	7.7862		3.63	810	2.26	438	0.8	1.06	17.8	13.5	102	59.7	17.3	85.5	8.4	1.74	3.99	980	23.6	47.7	4.83	17.8	3.83	0.54	2.34	0.43	2.97	0.54	1.67	0.27	1.9	0.294	2.38	0.54	0.98	12.3	9.1
Earthquake Flat-P_18	77.6233	0.115883	12.5364	0.98399	0.0179439	0.118178	0.811604	3.27486	4.5179	0.229397	3.99666	17.1813	7.79276
Earthquake Flat-P_19	77.8111	0.130835	12.5887	0.896085	0.0303739	0.0963454	0.834462	3.19611	4.41597	0.214169	3.75535	17.6204	7.61208
Earthquake Flat-P_20	78.0534	0.121367	12.4957	0.881799	0	0.102599	0.806602	3.06217	4.47632	0.226736	4.30538	17.437	7.53849		3.72	780	1.69	448	0.97	2.3	19.3	17.5	179	53.8	20.7	99	9.3	2.7	8.1	920	28.2	55.4	5.7	19.4	3.8	0.29	2.6	0.455	2.39	0.43	2.28	0.29	2.47	0.36	2.87	0.74	2.59	19.1	16.3
Earthquake Flat-P_21	77.8943	0.104203	12.5654	1.04248	0.0257317	0.115389	0.810842	3.16448	4.27711	0.235071	2.62175	18.2119	7.44159		3.94	820	1.39	466	0.64	4.59	18.1	16.9	184	61.8	24	104	10.8	2.47	8.5	1050	32.3	60.5	6.6	20.7	3.78	0.369	3.74	0.5	3.84	0.71	3	0.61	3.07	0.409	3.23	0.88	2.48	20.2	19.7
Earthquake Flat-P_22	77.6653	0.105788	12.5954	1.03532	0.0451714	0.115375	0.78675	3.18847	4.46239	0.28858	6.39234	17.4044	7.65086
Earthquake Flat-P_23	77.664	0.124295	12.4786	0.884571	0.0146224	0.114307	0.801857	3.43263	4.48501	0.16995	3.60922	17.3164	7.91764
Earthquake Flat-P_24	77.7548	0.134782	12.3635	1.01306	0.0390918	0.110059	0.816891	3.22289	4.54489	0.227926	3.85299	17.1082	7.76778
Earthquake Flat-P_25	78.0285	0.0826552	12.4608	0.743303	0.0293209	0.106662	0.788776	3.25701	4.50301	0.206502	3.85944	17.3281	7.76002
Average	77.8808	0.10938	12.4823	0.951841	0.0287	0.101729	0.792663	3.22584	4.42671	0.205937	3.83416	17.6051	7.65255		4.13909	884.091	2.4	489.545	0.838182	2.13636	19.6091	15.8273	121.664	64.9273	20.5	93.0727	8.94182	2.04182	4.86636	1053.27	26.0273	51.7364	5.57909	19.4182	3.65727	0.534455	3.05	0.527727	3.08333	0.608182	2.07909	0.319273	2.30545	0.378	2.71455	0.76	1.49909	14.8091	11.3918
Standard Deviation	0.201604	0.0208339	0.0811872	0.0888863	0.0128771	0.0148074	0.0287745	0.109101	0.114379	0.0297087	0.710506	0.473862	0.14477		0.425828	65.5507	0.503944	38.2397	0.165881	1.01345	2.99648	1.45402	30.5846	5.55933	2.10286	7.86919	0.899086	0.433286	1.73507	80.0613	2.69262	3.72002	0.551225	1.49454	0.50717	0.116706	0.474299	0.0934174	0.462115	0.105339	0.440555	0.107775	0.342092	0.0734275	0.495386	0.186922	0.612249	2.79229	3.41838
Ararata Gully 318_1	76.4946	0.184038	13.1643	1.47674	0.0456116	0.137809	1.07354	3.73472	3.68861	0.149609	5.00685	20.738	7.42333		5.04	929	2.01	367	0.97	4.6	19.6	18.7	146	80.1	21.8	141	8.1	3.1	7.28	684	24.4	53.1	5.49	20.5	3.44	0.43	3.19	0.57	3.85	0.62	1.9	0.313	1.87	0.29	3.81	0.71	1.81	21.3	12.2
Ararata Gully 318_2	77.7517	0.132423	12.7797	1.05619	0.0421311	0.0973123	0.939153	3.5579	3.64344	0.140552	5.83267	21.3402	7.20134		5.03	860	1.58	385	0.78	3.5	20.3	15.5	137	82	26.4	133	9.8	3.1	7	860	28.9	58.3	6.13	24.9	4.42	0.45	3.78	0.68	4.11	0.87	2.64	0.41	2.9	0.41	3.43	0.78	1.92	21.3	13.1
Ararata Gully 318_3	77.4345	0.126271	12.8396	1.21124	0.0165053	0.124173	0.978184	3.7572	3.51233	0.164648	5.11751	22.0465	7.26953		5.83	889	1.59	449	0.74	6.9	39.7	19.3	151	84	28.8	152	9.77	5.1	7.7	861	31.9	63.8	6.68	23.7	4.43	0.57	4.45	0.57	5.5	0.85	2.92	0.33	2.99	0.52	5.1	0.97	2.29	23.5	14.9
Ararata Gully 318_4	77.2599	0.189687	12.7618	1.31533	0.0292026	0.170415	1.00492	3.54682	3.72193	0.167182	5.25783	20.758	7.26875		4.63	796	2.22	409	0.61	8.9	22.8	18.1	126	71.3	24	121	9	6	8	773	26	54	5.37	20.3	3.69	0.41	3.6	0.53	3.38	0.84	2.58	0.38	2.05	0.35	3.9	0.73	1.32	22.8	12
Ararata Gully 318_5	77.3574	0.111188	12.7022	1.25679	0.0171138	0.104984	0.966103	3.76908	3.71518	0.178977	5.44053	20.822	7.48426		4.45	676	1.09	356	0.66	1.79	23.7	14.7	111	66	23.5	120	7.6	4.3	5.8	680	25	49.8	5.45	18	3.77	0.381	2.97	0.51	4.16	0.79	2.32	0.308	2.28	0.292	3.77	0.69	1.4	16.7	11.8
Ararata Gully 318_6	77.6934	0.150935	12.7589	1.1294	0.028891	0.139328	0.990033	3.59668	3.51238	0.172042	6.04265	22.1199	7.10906
Ararata Gully 318_7	76.1406	0.19028	13.234	1.58996	0.0303993	0.190583	1.29592	3.77931	3.54892	0.150474	5.55297	21.4546	7.32823
Ararata Gully 318_8	77.5659	0.150989	12.6175	1.2726	0.0405731	0.120795	0.984843	3.62303	3.62375	0.176724	6.07644	21.4049	7.24679		5.7	950	1.48	385	0.74	10.8	22.5	19	148	81	27.1	145	9.8	6.8	8	880	29.6	62	6.93	27.1	3.85	0.44	5.5	0.55	4.4	0.84	2.69	0.43	3.25	0.41	3.63	0.88	1.2	23	13.6
Ararata Gully 318_9	77.5932	0.128918	12.7218	1.20225	0.030026	0.111551	0.961971	3.55904	3.6912	0.190668	6.11726	21.0211	7.25024
Ararata Gully 318_10	77.5008	0.113246	12.6539	1.29424	0.0159354	0.107942	0.999999	3.68966	3.62431	0.153024	4.99992	21.3836	7.31397		6.3	970	5.2	450	1.32	57	38.4	20.7	159	85	27.4	152	10.9	8.1	7.9	960	28.8	65	7.5	25.9	5.3	0.54	4.3	0.591	3.81	0.85	2.82	0.37	3.16	0.47	3.89	1.01	1.8	29.4	14.9
Ararata Gully 318_11	77.6	0.147084	12.6664	1.22011	0.0330551	0.130096	0.953117	3.59507	3.65509	0.154565	5.24509	21.2307	7.25016		6.2	1030	2.28	486	0.81	9.2	42.9	20.8	177	95	28.5	152	11.7	5	9.1	1000	31.8	61.7	6.8	27.8	4.3	0.39	3.8	0.53	4.05	0.87	2.58	0.457	3.3	0.34	4.21	1.17	2.25	30.2	14.3
Ararata Gully 318_12	77.4946	0.134356	12.7479	1.22244	0.0427462	0.123416	1.01347	3.52108	3.69991	0.209231	7.18774	20.945	7.221
Ararata Gully 318_14	77.3583	0.147957	12.7576	1.27827	0.038793	0.136658	0.995262	3.80955	3.47764	0.165847	5.80366	22.2445	7.28719		4.68	844	1.53	398	0.74	5.7	24.8	16.2	133.1	81.3	27.8	136	9.49	4.44	7.26	857	29.6	57.3	5.95	26	4.85	0.61	4.52	0.63	4.86	0.96	2.65	0.4	3.35	0.47	3.35	0.62	1.89	19.9	14.4
Ararata Gully 318_15	77.8181	0.11936	12.6288	1.10015	0.0232672	0.136608	0.988263	3.59296	3.59256	0.165786	5.76899	21.6609	7.18552
Ararata Gully 318_16	76.4751	0.184552	13.1351	1.4788	0.00771503	0.124375	1.25798	3.65342	3.68287	0.180949	5.2717	20.7651	7.33629
Ararata Gully 318_17	77.4449	0.14679	12.691	1.22592	0.0489338	0.116049	0.977544	3.65939	3.68943	0.165682	5.05538	20.991	7.34883		5.21	840	1.24	421	0.45	4	24.3	17.7	145	81	28.2	145	9.9	2.19	8.4	820	28.6	60.6	6.06	24	4.4	0.61	2.95	0.75	4.61	0.81	2.68	0.35	2.79	0.41	4.31	0.79	1.8	20.5	14.5
Ararata Gully 318_18	77.5349	0.11156	12.8015	1.15921	0	0.0937608	0.914076	3.65203	3.73301	0.146194	5.75635	20.7701	7.38504		5.73	850	3.9	384	0.83	7.1	31.9	16.5	153	78.5	25.8	126	9.46	1.92	8.08	835	27.5	56.7	6.63	23.6	5.11	0.83	4.35	0.75	3.87	0.98	2.75	0.492	2.79	0.5	4.37	0.96	1.31	20.3	13.1
Ararata Gully 318_19	77.4231	0.147194	12.687	1.28799	0.0164207	0.144362	0.93893	3.57519	3.77976	0.190633	7.80731	20.4836	7.35495
Ararata Gully 318_20	77.4293	0.120968	12.8416	1.19256	0.0105528	0.120711	0.937614	3.5637	3.78305	0.156979	6.01144	20.4674	7.34675
Ararata Gully 318_21	76.8293	0.204036	12.9909	1.40215	0.0292248	0.206266	1.10581	3.72928	3.50306	0.134076	5.32956	21.932	7.23234		5.3	1030	3.1	377	1.18	4.61	20.2	16.3	124	93	24.6	164	9.3	1.61	7.41	699	24.7	51.2	5.56	20.7	3.9	0.61	4.14	0.515	4.7	0.83	2.25	0.39	2.02	0.404	4.26	0.85	1.23	17.2	14.2
Ararata Gully 318_22	74.6851	0.292752	13.9172	1.95071	0.0154191	0.296906	1.70542	3.60498	3.53158	0.151065	5.20417	21.1478	7.13656		6.49	1820	11.6	558	3.22	20.2	21.9	22.5	165	148	23.2	241	10.2	2.67	11.1	828	28.6	58.5	6.37	27.7	3.61	0.83	5.04	0.59	3.82	0.68	2.3	0.5	3.34	0.44	5.09	0.73	2.25	27.5	11
Ararata Gully 318_23	77.5266	0.16287	12.812	1.16539	0.0161345	0.102315	1.00361	3.53507	3.67607	0.190779	6.17199	21.0895	7.21113		4.64	832	1.1	409	0.71	3.68	34.4	18.1	137	78.7	25	135	9.4	1.18	7.9	828	27.7	59.5	5.9	23.7	3.81	0.82	4.06	0.62	4.17	0.99	2.54	0.369	2.71	0.48	3.67	0.93	2.01	22.1	13.7
Ararata Gully 318_24	77.3741	0.138851	12.7707	1.25565	0.00870299	0.0977566	0.958404	3.67402	3.7218	0.16278	4.02882	20.7894	7.39582
Ararata Gully 318_25	78.0325	0.133093	12.3535	1.16716	0.0409834	0.0685169	0.891948	3.54882	3.76338	0.154446	4.46945	20.7347	7.3122		6.04	853	1.68	386	0.78	5.1	43.7	17	155	68.8	27.8	149	9.9	1.48	8.5	864	31.1	64.2	6.92	25	5.2	0.75	4.5	0.65	4.56	0.94	2.37	0.49	2.88	0.43	3.82	0.96	1.96	20	14.9
Average	77.2424	0.152892	12.8348	1.28797	0.0261807	0.133445	1.03484	3.63867	3.6488	0.165538	5.60651	21.1808	7.28747		5.418	944.6	2.77333	414.667	0.969333	10.2053	28.74	18.0733	144.473	84.9133	25.9933	147.467	9.62133	3.79933	7.962	828.6	28.28	58.38	6.24933	23.9267	4.272	0.578067	4.07667	0.6024	4.25667	0.848	2.53267	0.399267	2.77867	0.4144	4.04067	0.852	1.76267	22.38	13.5067
Standard Deviation	0.701956	0.0400725	0.298015	0.188134	0.0136611	0.046171	0.171668	0.0866942	0.0923068	0.0181252	0.789167	0.513745	0.0900339		0.67245	258.759	2.69298	52.8457	0.658401	13.678	8.82009	2.15654	17.0156	19.0969	2.19528	28.725	0.982481	2.0967	1.15198	91.1731	2.42846	4.73304	0.646479	2.93074	0.613505	0.164631	0.720612	0.0777907	0.527699	0.101784	0.262147	0.0635829	0.502591	0.0707963	0.524724	0.148622	0.380966	3.96092	1.26122
Kakariki 272_1	78.1677	0.12789	12.6374	0.874066	0.0386122	0.0749272	0.81011	3.64927	3.61999	0.168513	5.36267	21.5933	7.26927		4.3	790	1.09	344	0.65	7.1	18.5	16	140	68.2	21.6	103	8.3	2.77	6.2	836	24.8	53	5.92	19.4	4.05	0.64	3.22	0.61	3.34	0.54	2.41	0.295	1.93	0.42	3.77	0.77	1.22	18	14
Kakariki 272_2	78.2236	0.121214	12.3979	0.914843	0.0192717	0.0955058	0.97897	3.63513	3.61354	0.14876	5.19373	21.6474	7.24867
Kakariki 272_3	77.7785	0.135991	12.5463	1.07352	0.0273906	0.123639	0.940091	3.54535	3.82918	0.146863	4.70779	20.312	7.37453		4.61	885	1.3	373	0.75	3.39	31	16.4	146	82.4	22.7	109.1	9	3.7	6.48	922	27	53.5	5.26	21.1	4.3	0.62	4	0.49	3.8	0.76	2.62	0.37	2.56	0.39	3.62	0.92	1.8	19.6	14.6
Kakariki 272_4	78.1045	0.122093	12.4963	0.873701	0	0.130737	0.894656	3.49733	3.88068	0.172211	4.875	20.1265	7.37801		3.84	808	1.29	376	0.7	Below LOD	25.4	17.4	144	78	22.5	114	8.2	3.5	5.83	890	26.9	53.1	5.76	18.2	3.33	0.77	3.37	0.53	4.01	0.7	2.32	0.346	2.66	0.392	3.22	0.91	1.5	19.4	15.6
Kakariki 272_5	78.1303	0.136362	12.5317	1.0033	0.0340569	0.103313	0.859347	3.64264	3.55903	0.166669	4.96655	21.9527	7.20166		4.08	830	1.24	404	0.51	2.9	34.3	17.8	153	76.9	20.7	100	8.64	4	6.2	870	26.5	49.8	5.72	18.5	3.88	0.67	3.8	0.52	3.29	0.8	2.24	0.296	2.16	0.32	3.99	0.85	1.59	20.2	14.7
Kakariki 272_6	78.1095	0.14935	12.4359	0.998621	0	0.116184	0.904916	3.48501	3.80043	0.147258	4.22684	20.5528	7.28544
Kakariki 272_7	78.1301	0.0746602	12.5067	1.09361	0.0285819	0.0999323	0.877438	3.41522	3.77371	0.182767	5.02657	20.7038	7.18894		4.74	1160	17.3	360	3.25	54	20.5	25	119	66.6	20.9	121	8.71	3.9	5.8	667	23.4	49.7	5.1	18	3.61	0.81	3.06	0.43	2.98	0.69	1.81	0.309	2.33	0.43	3.1	0.86	1.35	23.4	14.7
Kakariki 272_8	78.1102	0.111584	12.5121	1.01673	0.0065719	0.117882	0.92234	3.38194	3.82066	0.190071	4.68089	20.4442	7.2026		5.1	1020	12.4	386	3.4	75	30.3	22.8	114.9	73.5	19.2	113	8.12	2.64	4.72	733	21	40.1	4.36	16.5	2.83	0.51	3.06	0.48	3.18	0.67	1.73	0.273	2.31	0.312	3.41	1.01	1.49	18.8	12.6
Kakariki 272_9	78.0568	0.138103	12.5539	0.942541	0.013778	0.147419	0.897376	3.42243	3.82767	0.15233	5.2794	20.3927	7.2501		3.61	674	0.9	314	0.39	1.32	32	12.9	119	68	21	95.6	7.3	2.6	5.46	727	22.5	44.4	4.61	17.2	3.85	0.52	2.7	0.548	3.49	0.64	2.04	0.321	2.12	0.44	3.24	0.62	1.27	15.7	12
Kakariki 272_10	78.1558	0.146221	12.5148	0.948991	0.00438147	0.114453	0.862276	3.40775	3.8453	0.146828	4.68537	20.325	7.25305		3.38	730	0.7	339	0.34	0.96	29.9	15.2	129	64.8	20.7	100	7.8	2.18	6.2	770	24.9	49.9	5.03	18.3	3.8	0.58	2.91	0.464	3.53	0.77	2.07	0.45	2.21	0.384	3.18	0.55	1.59	16.2	13.6
Kakariki 272_11	78.0037	0.115893	12.4951	1.21154	0.00659813	0.0919239	0.987464	3.60426	3.4835	0.175974	5.0598	22.3923	7.08776		5.1	680	5.4	346	1.23	14.6	32.1	14.6	114	77	23.2	98	8.7	1.43	5.14	741	23.4	46.9	5.48	20.1	4.8	0.63	4.13	0.6	4.13	0.78	2.1	0.41	2.31	0.41	3.29	0.74	1.44	18.3	9.7
Kakariki 272_12	78.0473	0.119808	12.4645	1.01814	0.00550084	0.124152	0.903376	3.58008	3.73716	0.193199	5.10132	20.8841	7.31724		3.6	790	1.98	360	1.4	11.5	14.3	16.3	124	90	19.8	97	7.1	1.3	4.6	1760	22.2	45	4.84	16.5	3.19	0.91	2.26	0.38	3.12	0.69	1.79	0.36	2.48	0.49	2.62	0.63	0.97	17.7	11.4
Kakariki 272_13	77.9974	0.101179	12.6569	1.07578	0.0180469	0.0799991	0.955942	3.59903	3.51567	0.164796	4.54442	22.1856	7.1147		5.53	850	6.4	381	2.15	30	37.3	19.1	125	83	27.3	116	10	1.69	5.35	923	27.8	55.7	6.19	25.1	5.1	0.79	4.3	0.87	4.8	0.99	3.04	0.49	2.85	0.45	3.91	0.93	2.46	23.1	13.9
Kakariki 272_14	78.0181	0.107579	12.6079	0.917821	0.0120309	0.116567	0.824965	3.61504	3.78003	0.14888	4.54144	20.6396	7.39506
Kakariki 272_15	78.1978	0.13741	12.492	1.01185	0.0400298	0.105426	0.9257	3.52412	3.56565	0.16752	4.8018	21.9309	7.08977		4.65	1050	4.3	417	2.7	11.8	47.9	17.3	157	89	23.1	125	9.6	1.96	6.5	990	29.9	53.9	6.15	24.8	4.5	0.74	3.5	0.63	3.51	0.77	2.33	0.34	2.33	0.38	3.54	0.74	2.03	20.6	15.3
Kakariki 272_16	77.9881	0.149847	12.4097	1.1127	0.0284375	0.10857	0.935209	3.57437	3.69305	0.181844	4.54449	21.1175	7.26742		4.14	547	0.76	306	0.58	1.97	24	13.4	101.8	74.1	24	90.5	7.58	1.61	4.62	781	24.9	49.6	5.41	19.4	5.15	0.65	3.69	0.63	3.39	0.73	2.19	0.368	2.25	0.35	2.86	0.438	1.07	15.4	9.98
Kakariki 272_17	78.0888	0.124211	12.5818	0.845917	0.030073	0.103981	0.884858	3.45144	3.88888	0.168176	4.528	20.08	7.34031		4.38	910	2.9	398	0.93	Below LOD	25.1	15.8	145	74	20.2	109	8.8	2.31	6.3	830	24.9	48.9	5.5	19	3.4	0.39	3.66	0.43	3.6	0.66	2.28	0.37	2.25	0.4	3.11	0.83	1.58	21.2	13.6
Kakariki 272_18	78.1666	0.1424	12.5296	0.99201	0.0525131	0.132844	0.9133	3.49786	3.57289	0.183803	5.5622	21.8777	7.07075
Kakariki 272_19	78.4385	0.111817	12.4916	0.916968	0.00439042	0.12845	0.90127	3.32334	3.68368	0.156252	4.87965	21.2935	7.00702
Kakariki 272_20	78.2431	0.133319	12.4402	0.906877	0.0165806	0.115499	0.901035	3.53473	3.70869	0.138981	5.54839	21.0972	7.24342		4.84	960	2.01	425	1.02	6.7	28.7	18	167	85	24.3	121	9.2	3.28	7.3	970	29.2	56.9	6.6	22.2	4.1	0.6	3.59	0.59	3.2	0.77	2.53	0.347	2.73	0.297	3.55	0.73	1.51	21.5	14.8
Kakariki 272_21	78.1839	0.115192	12.3541	0.818738	0.0198957	0.106254	0.889959	3.41379	4.09813	0.152756	5.54343	19.078	7.51191		4.54	860	3	386	0.65	Below LOD	28.6	17.1	156	80	23.2	117	9.5	3.26	6.22	910	27.2	53.9	5.6	22.3	3.9	0.67	4.13	0.62	3.93	0.85	2.8	0.5	2.86	0.5	3.8	0.8	1.42	20.7	14.9
Kakariki 272_22	78.1972	0.142849	12.4442	0.937739	0.0120893	0.101056	0.94411	3.38293	3.83789	0.151887	5.0031	20.3751	7.22082		5	910	2.49	403	0.85	10.1	23.4	18.1	146	84	24.6	116	9	2.8	5.57	910	29.3	55	5.4	21.8	4.1	0.53	3.05	0.52	3.04	0.64	2.07	0.47	2.83	0.49	3.69	0.89	1.59	20.5	16.4
Kakariki 272_23	77.9104	0.127728	12.4958	1.06511	0.0336052	0.103614	0.900327	3.49753	3.86578	0.162575	5.24273	20.1539	7.36331		4.22	815	9	275	1.75	38	23.6	18.2	93	86.4	15.8	86.7	7.77	1.67	3.82	572	18.7	42.8	4.66	17.5	3.99	0.58	2.58	0.5	2.27	0.51	1.61	0.255	2.24	0.33	3.11	0.7	1.27	20.1	14.3
Kakariki 272_24	78.0366	0.171912	12.4315	1.08985	0.051329	0.11534	0.960363	3.46093	3.68213	0.159435	5.41769	21.1934	7.14306
Kakariki 272_25	78.1007	0.152621	12.51	0.847175	0.0309277	0.131572	0.933431	3.44497	3.84861	0.16872	5.47869	20.2932	7.29358
Average	78.1034	0.128689	12.5015	0.980326	0.0213877	0.11157	0.908353	3.50346	3.74128	0.163883	4.99208	20.9057	7.24474		4.42556	848.278	4.13667	366.278	1.29167	17.956	28.1611	17.3	132.983	77.8278	21.9333	107.328	8.51778	2.58889	5.68389	877.889	25.25	50.1167	5.42167	19.7722	3.99333	0.645	3.38944	0.546778	3.47833	0.72	2.22111	0.365	2.41167	0.399167	3.38944	0.773222	1.50833	19.4667	13.6711
Standard Deviation	0.12539	0.0199523	0.0724562	0.0983062	0.0152475	0.0167228	0.0427497	0.0925204	0.143512	0.0149076	0.378448	0.804463	0.117671		0.58769	145.975	4.56439	40.1187	0.967977	21.9694	7.58932	2.94099	20.4767	7.75468	2.53215	11.3209	0.811016	0.875764	0.860671	246.271	3.03436	4.7494	0.593616	2.60538	0.623425	0.125522	0.578064	0.110057	0.544386	0.11024	0.374557	0.0730898	0.275964	0.061673	0.372155	0.147037	0.343396	2.28962	1.85731
Fordell 449_1	77.0326	0.20599	12.8256	1.29728	0.0399317	0.122917	0.835577	3.97516	3.665	0.14803	3.26048	21.0185	7.64016		6.06	1039	1	468	0.68	0.74	50.5	14.9	119	65.9	34.7	201	10.55	1.93	6.17	745	29	57.2	6.45	24.2	5.98	0.99	6	0.85	5.86	1.17	3.59	0.62	3.71	0.63	6.39	0.95	1.54	20.6	12.5
Fordell 449_2	78.1795	0.115165	12.3758	1.11592	0	0.0773624	0.603091	3.70427	3.82889	0.221617	5.52145	20.4183	7.53317		6.8	603	Below LOD	410	0.46	Below LOD	50.3	17.3	151	35.5	42.4	126	11.3	2.22	7.7	880	34.1	69.2	8	29.9	7.2	0.84	6.5	0.8	7.3	1.37	4.12	0.61	4.2	0.64	3.83	0.98	1.6	24.1	15.9
Fordell 449_3	77.2953	0.161163	12.5203	1.17589	0.0264255	0.0494708	0.59212	3.64791	4.53142	0.22768	5.17825	17.0576	8.17933
Fordell 449_4	77.6606	0.213536	12.8756	0.641192	0.016282	0.023818	0.72669	4.02542	3.81688	0.152269	3.81617	20.3466	7.8423		6.17	1070	0.88	369	0.71	1.15	45.9	14.1	113	62.7	29.1	182	10	1.39	5.12	687	25.4	53.2	6.24	26.1	4.81	1.07	4.58	0.77	4.73	1.04	3.6	0.45	3.32	0.353	5	0.95	1.28	18.6	10
Fordell 449_5	77.94	0.0995327	12.4002	1.19548	0.0325652	0.0611331	0.601358	3.64009	4.02964	0.216797	5.42239	19.3417	7.66973		5.5	760	6.3	380	1.4	37	35	18.3	162	42.8	27.9	140	10.9	2.98	8.2	780	26.6	60	7	25.9	4.8	1.03	5.1	0.81	4.8	0.98	2.17	0.4	3	0.51	4	0.93	1.98	21	11.9
Fordell 449_6	78.0911	0.132086	12.2719	0.935298	0.021012	0.0427547	0.598028	3.7646	4.14322	0.219486	5.59253	18.8479	7.90781		5.8	630	9	310	1.48	85	39.1	19.7	155	42.4	24.9	92	8.5	1.75	7.7	810	23.7	51.7	6.2	22.2	5	0.95	4.9	0.78	4.2	0.88	2.8	0.45	2.73	0.41	3.35	0.83	1.61	25.9	10
Fordell 449_7	78.0489	0.0996082	12.4245	1.05345	0.0165711	0.0530992	0.591895	3.83156	3.88036	0.220405	5.49414	20.1139	7.71192		5.49	589	2.1	355	0.93	26	35.8	16.6	136	31.2	32.6	100	9.7	2.28	7.7	762	27.8	59	7.2	26	4.7	0.91	5.8	0.9	5.3	1.05	3.49	0.5	3.94	0.49	3.6	1.11	1.9	22	12.7
Fordell 449_8	78.0678	0.110328	12.3765	1.02893	0.0083135	0.0694933	0.616009	3.71184	4.01077	0.20963	5.81167	19.4646	7.72261		7	635	Below LOD	466	0.58	3.9	40.4	20.4	174	37.7	40.6	123	12	3.5	9.5	960	36.6	76	8.7	30.2	6.7	1.21	5.9	1.05	6.13	1.36	3.31	0.45	4.12	0.72	4.07	0.88	2.38	28.5	15.4
Fordell 449_9	78.3828	0.0683323	12.4128	0.759826	0.0308293	0.00575235	0.517412	3.70037	4.12186	0.231109	5.17709	19.0164	7.82223		5.3	530	Below LOD	318	0.29	3.3	35.4	15.2	136	31.1	33.8	111	9.3	2.93	7.5	740	28.6	64	7	25.8	4.71	1.02	6.1	0.8	5.4	1.25	3.53	0.53	3.73	0.56	3.7	0.92	1.47	20.4	13.3
Fordell 449_10	78.1228	0.0968686	12.4892	1.07868	0.0352962	0.0610834	0.572256	3.59027	3.95352	0.205159	5.34544	19.7603	7.54379		7.5	740	1.45	430	0.78	12.7	55	19.5	172	40	43	134	13.4	3.9	9.7	930	34.5	77	9.7	33.8	7	1.02	7.2	1.02	6.6	1.37	4.5	0.58	4.7	0.9	5.3	1.35	2.06	24.9	15.7
Fordell 449_11	78.0075	0.0886578	12.3546	1.16055	0.0126189	0.0664999	0.597758	3.73723	3.97461	0.218919	4.85288	19.6264	7.71185
Fordell 449_12	78.234	0.0835827	12.4182	0.996701	0.037886	0.0665513	0.594934	3.68109	3.88704	0.214524	4.92636	20.1269	7.56813
Fordell 449_13	78.102	0.110612	12.2122	1.11846	0.0258125	0.0654193	0.598362	3.87815	3.88903	0.216858	4.94879	20.0827	7.76718
Fordell 449_14	78.0072	0.0658203	12.3806	1.01172	0.0479441	0.0644916	0.554225	3.72801	4.13995	0.233634	5.27307	18.8426	7.86796		10.2	976	Below LOD	630	0.48	6	73.3	28.7	262	47.7	63.1	189	19.4	1.8	13.9	1430	56	117.8	13.5	50.5	11.3	0.78	11.3	1.71	12.9	2.2	6.5	1.16	7.2	0.98	7.7	1.71	3.6	39.4	25
Fordell 449_15	77.9821	0.0926834	12.2999	1.10909	0.0252844	0.0850014	0.571442	3.82802	4.00651	0.203332	5.02835	19.4638	7.83453
Fordell 449_16	78.1924	0.116192	12.3858	1.15781	0.0341783	0.0518407	0.621508	3.61165	3.82868	0.193613	5.30424	20.4228	7.44033		6.8	750	Below LOD	423	0.36	3.34	49	17.2	161	41.8	40	129	12.1	1.83	8.7	930	33.7	72	8.6	33.6	6.2	0.71	6.6	1.12	6.9	1.29	4.22	0.69	4.16	0.69	5	1.18	2.04	23.4	15.1
Fordell 449_17	77.8685	0.0838292	12.4325	1.08226	0.0165207	0.0690492	0.625258	3.74065	4.0814	0.21859	5.20587	19.0789	7.82204		7	786	Below LOD	446	0.56	4.15	44.3	18.7	173	41.9	42.4	145	13	1.47	8.63	970	36.3	80	10.1	34.6	6.8	0.59	7.4	1.34	7.4	1.75	4.34	0.71	5.2	0.78	5.6	1.11	2.42	26	16.4
Fordell 449_18	78.1373	0.103369	12.3952	1.09154	0.0126898	0.0495788	0.592311	3.66065	3.95731	0.202951	5.38471	19.7451	7.61796		8.6	1070	10.6	572	1.4	55	64	27.3	222	60	45.8	164	16.4	2.24	13.8	1220	44.8	93	10.5	41	6.9	0.62	6.5	1.17	8.2	1.39	4.2	0.78	5.1	0.79	6	1.32	2.98	33.1	17.9
Fordell 449_19	78.1635	0.0929605	12.2206	1.11861	0	0.0622135	0.657859	3.76107	3.92319	0.207377	5.31148	19.9234	7.68427		6.6	670	1.1	405	0.54	6.8	36.3	16.5	146	38.4	39.5	125	10	1.37	8.1	820	33.1	69	7.8	30.6	7.3	0.401	6.1	1.07	6.6	1.21	4.12	0.67	3.93	0.66	4.9	1.01	1.89	23.3	15.3
Fordell 449_20	78.12	0.0712464	12.3144	1.09949	0.0188064	0.054328	0.601537	3.6421	4.07798	0.219558	5.62371	19.1566	7.72008		5.79	574	Below LOD	369	0.42	1.42	42.9	15.7	134	30.9	37.2	109	9.4	1.24	7.43	761	29.8	64.5	6.86	26.2	6.4	0.41	6	0.94	5.16	1.21	3.14	0.47	3.41	0.63	4.3	0.87	1.22	20.8	13.8
Fordell 449_21	76.9548	0.121505	11.8391	1.91998	0.0507784	0.332187	1.32274	3.60938	3.84945	0.18238	5.4203	19.9911	7.45884
Fordell 449_22	79.2007	0.0842135	12.2865	0.457503	0.00940467	0.0138732	0.559683	3.81344	3.5747	0.148311	5.63853	22.1559	7.38814		7.7	750	Below LOD	567	0.51	2.68	55.7	18.4	206	16.2	47.2	130	12.8	1.63	9.8	670	37.4	80	9.2	37	7.2	0.4	6.6	1.25	8.2	1.76	4.65	0.79	5.6	0.75	4.46	1.09	2.3	27.7	15.8
Fordell 449_23	78.0212	0.107298	12.2305	1.11487	0.0185446	0.0444532	0.623639	3.93475	3.90469	0.190431	4.29153	19.9814	7.83944		6.7	690	Below LOD	420	0.28	5.8	52	17.4	160	41.2	42	134	12.1	1.7	8.5	930	35.5	71	8.1	29.9	7.4	0.5	7.1	1.22	7.4	1.64	4.6	0.55	5.1	0.61	4.7	1.14	2.2	24.2	15.4
Fordell 449_24	78.41	0.113703	12.3235	0.960118	0.0325513	0.0415067	0.551561	3.50269	4.06435	0.208678	5.38214	19.2921	7.56704		5.03	550	1.61	348	0.46	13.4	43.4	14.3	127	30.5	32.6	99	9.7	1.12	6.4	750	28.3	56.7	6.21	27.8	6.21	0.37	4.8	1.06	5.4	1.22	3.37	0.57	3.42	0.5	3.36	0.56	1.77	21.5	11.9
Fordell 449_25	78.2153	0.101146	12.2674	1.0155	0.041528	0.0439706	0.608794	3.65742	4.0489	0.193321	5.72206	19.3177	7.70632		6.89	696	Below LOD	448	0.42	1.7	59.6	19.7	173	42.8	47.4	137	13.6	1.41	8.8	1030	39.8	80	8.6	35.1	7.5	0.39	6.7	1.3	8.7	1.43	4.5	0.84	5.1	0.9	4.8	1.55	2.41	27.6	18.3
Average	78.0175	0.109577	12.3733	1.06785	0.024471	0.0671139	0.637442	3.73511	3.96757	0.204186	5.15734	19.7037	7.70269		6.68053	742.526	3.78222	428.105	0.670526	15.0044	47.7842	18.4158	162.211	41.0895	39.2737	135.263	11.7974	2.03632	8.59737	884.474	33.7368	71.1211	8.20842	31.0737	6.53211	0.747947	6.37789	1.05053	6.69368	1.34579	3.93421	0.622105	4.29842	0.658053	4.74	1.07579	2.03421	24.8947	14.8579
Standard Deviation	0.441668	0.036543	0.193512	0.252318	0.0138124	0.0598273	0.155309	0.125242	0.182378	0.0241186	0.588892	0.915031	0.172719		1.24098	174.369	3.81432	85.8273	0.373266	22.7102	10.4942	3.86986	36.5629	11.9648	8.71167	30.2395	2.66877	0.780237	2.19754	189.279	7.59212	15.6821	1.8493	6.76082	1.52543	0.279962	1.43842	0.244982	1.98357	0.315283	0.909629	0.18244	1.07169	0.168305	1.12064	0.266381	0.583527	4.96739	3.40201
Upper Griffins Road 307_1	77.4154	0.14586	12.6672	1.54336	0.0166827	0.126669	1.02531	3.61532	3.44423	0.19762	6.12636	22.4768	7.05955		5	1110	2.4	421	0.9	4.6	43	17.3	138	66	33.3	150	9.2	2.59	8.8	627	26.5	57.1	6.6	22.1	4.84	0.83	4.3	0.67	4.3	1.29	3.87	0.5	2.88	0.54	4.15	0.78	1.58	12.6	11.2
Upper Griffins Road 307_2	77.7134	0.140841	12.473	1.30778	0.0457937	0.0784036	1.07453	3.7458	3.42045	0.217857	5.38465	22.7202	7.16625		4.66	1043	1.06	396	0.85	1.84	47.7	16	134	67.8	33.2	154	9.9	2.38	8.04	634	26.5	59	6.54	27.2	5.32	0.76	4.26	0.75	5.06	1.25	3.75	0.52	3.14	0.636	4.48	0.67	1.51	12.6	13.3
Upper Griffins Road 307_3	77.2556	0.207316	12.5693	1.59096	0.0417875	0.13099	1.06974	3.70528	3.42898	0.185113	5.05841	22.5302	7.13426		3.31	946	1.13	325	0.78	2.47	36.9	12.29	103.9	71.5	22.63	164.4	7.72	1.47	6.06	530	20.8	46.4	5.59	20.3	4.11	0.95	3.39	0.604	3.3	0.818	2.82	0.366	2.66	0.393	5.18	0.553	1.3	12.7	10.36
Upper Griffins Road 307_4	77.4506	0.179964	12.5444	1.54087	0.0290911	0.115852	1.04708	3.55707	3.53501	0.174528	4.89449	21.9096	7.09208		4.15	968	1.23	363	0.89	2.67	49.4	14.7	125.2	64.5	28.8	153.1	11.2	1.73	7.35	685	23.2	57.3	6.45	27	5.38	0.78	3.86	0.86	4.14	1.312	3.98	0.519	3.73	0.633	4.64	0.81	1.87	11.5	12.01
Upper Griffins Road 307_5	77.938	0.16737	12.3155	1.21235	0	0.111438	0.951085	3.55118	3.753	0.163375	5.04269	20.7669	7.30418		3.88	870	1.29	353	0.666	1	50.1	14.87	130.2	58.3	30.7	152	11.48	2.12	8.16	719	24	59.5	6.81	28.3	5.99	0.97	4.12	0.93	3.99	1.29	3.82	0.589	4.06	0.564	4.78	0.79	1.58	12.35	12.87
Upper Griffins Road 307_6	77.0616	0.214161	12.6507	1.51651	0	0.143902	1.04429	3.90338	3.46546	0.182031	5.23859	22.237	7.36885		3.77	893	Below LOD	352	0.94	Below LOD	57.5	14.6	120	74.4	24.6	143	10.2	1.74	7.33	670	20.3	49.9	6.46	22.7	5.56	0.65	3.62	0.81	3.57	1.06	3.22	0.53	4.2	0.52	4.4	0.62	1.44	13.7	10.2
Upper Griffins Road 307_7	77.6963	0.167386	12.4272	1.46811	0.0282571	0.0972602	1.0271	3.69435	3.39399	0.196898	5.78227	22.8923	7.08834		3.24	777	1.3	351	0.94	1.92	45.8	14.9	103.9	63.1	27.8	142	9.5	1.52	6.61	641	21.4	54.3	5.35	22.6	4.71	0.69	3.07	0.79	3.73	1.25	3.25	0.383	4.18	0.639	4.57	0.6	1.61	12	11.85
Upper Griffins Road 307_8	77.7867	0.189622	12.5105	1.5246	0.0321654	0.119371	0.988216	3.58623	3.26251	0.168269	5.8699	23.8426	6.84875		4.24	930	1.46	394	0.98	3.5	50.4	16.3	136	68.6	30.6	156	9.82	1.78	7.72	675	24.5	57.1	6.9	24.4	5.46	0.97	4.68	0.78	4.48	1.31	3.63	0.455	4.75	0.64	4.98	0.898	1.35	13.8	12.6
Upper Griffins Road 307_9	77.5736	0.165469	12.3841	1.50508	0.0336716	0.137271	0.95828	3.76577	3.47675	0.164044	5.42956	22.3121	7.24252		4.41	825	1.22	380	0.99	1.61	55.7	15.2	121	73.5	30.4	165	9.58	1.6	7.86	713	24.4	59.4	7.01	24.2	5.37	1.01	4.11	0.82	4.75	1.25	3.74	0.48	4.61	0.564	5.39	0.74	1.7	15.79	12.62
Upper Griffins Road 307_12	77.5715	0.174065	12.6241	1.37521	0.0445954	0.0920436	0.96458	3.69679	3.45703	0.183069	5.1833	22.4388	7.15382		7.49	1087	1.29	372	1.05	2.48	52.9	14.3	119	87.3	35.9	162	7.91	1.95	6.7	678	31.5	58	6.52	24	4.9	0.9	5.99	0.85	6.65	1.11	3.27	0.502	2.91	0.516	4.53	0.65	1.28	22.6	12
Upper Griffins Road 307_13	77.5474	0.17821	12.6033	1.35356	0.0573472	0.107167	1.0409	3.71401	3.39814	0.202834	5.33044	22.8205	7.11215		9.11	1410	1.78	479	1.03	3.99	61.4	18.3	155	95.8	47.2	156	9.2	1.63	7.4	723	39.9	58.8	7.6	29.8	4.82	0.78	7.21	0.96	7.9	1.33	3.4	0.63	3.37	0.601	4.82	0.84	2.08	27.1	13.3
Upper Griffins Road 307_14	77.4647	0.168366	12.5826	1.41814	0.0318301	0.12042	1.02829	3.65448	3.53121	0.189325	4.8782	21.9372	7.18569		9.38	1500	9.9	388	1.64	21	63.6	19	139.7	91.3	43	170.8	8.8	2.09	8.08	685	37	62.1	7.63	25.8	4.6	0.97	6.8	0.86	7.1	1.35	4.07	0.574	3.04	0.62	5.02	0.74	1.88	27.7	13.3
Upper Griffins Road 307_16	77.5926	0.175548	12.5156	1.46975	0.00275584	0.10136	1.03053	3.65308	3.4587	0.176398	5.28772	22.4341	7.11177		7.63	1302	2.2	385	1.14	7.4	49.8	16.27	142.8	71.7	41.8	145.9	8.05	1.96	7.18	613	34.7	57	7.03	25.9	3.53	0.84	7.1	0.8	6.75	1.17	3.47	0.64	2.45	0.567	4.58	0.83	1.55	19.7	12.28
Upper Griffins Road 307_17	77.7381	0.167998	12.5235	1.24222	0.0465157	0.152252	1.01207	3.58521	3.53206	0.215468	6.85318	22.0093	7.11728		9	1520	6.2	469	1.57	17.5	31.7	19.4	151	86	44.8	156	7.75	1.55	8.5	630	38.5	57.9	8.1	22.9	3.94	0.77	5.8	0.86	5.41	1.26	3.59	0.52	2.32	0.51	5	0.75	1.66	19.8	12.3
Upper Griffins Road 307_18	77.4556	0.173687	12.6328	1.40313	0.0269188	0.122841	1.04361	3.77831	3.36309	0.205505	4.97684	23.0311	7.1414		6.74	1250	5.5	399	1.58	10.4	52.7	16.6	124.5	79.3	38.2	142	7.28	1.54	7.53	569	32.4	56.1	6.08	20.3	2.82	0.86	4.57	0.742	5.61	1.15	3.53	0.51	2.37	0.5	4.68	0.72	1.72	19.62	12.1
Upper Griffins Road 307_19	77.4352	0.174402	12.4759	1.42752	0.0270296	0.118735	0.920215	3.96796	3.453	0.192594	5.36636	22.4255	7.42096		6.84	1276	1.14	458	1	2.88	58.8	17.7	155.2	88.7	44.9	149.1	8.94	2.1	8.37	697	38.1	60.6	7.76	27.1	4.29	1	6.74	0.9	6.53	1.38	4.14	0.595	3.37	0.625	5.26	1.02	2.27	20.8	13.75
Upper Griffins Road 307_20	77.6007	0.170912	12.3995	1.46704	0	0.0901195	0.962012	3.80052	3.50913	0.205668	5.57987	22.114	7.30965		6.36	1106	1.03	419	0.86	3.04	57.3	16.6	145	79.4	40.9	157	9.11	2.02	8.61	690	33.6	64.1	7.46	26.5	4.67	0.93	5.99	0.921	5.56	1.38	4.29	0.632	3.27	0.562	5.45	0.87	1.99	20	13.3
Upper Griffins Road 307_22	77.6442	0.174335	12.4818	1.49729	0.0330848	0.109471	0.989181	3.70252	3.36814	0.203979	5.32996	23.0526	7.07066
Upper Griffins Road 307_23	77.4065	0.155032	12.5405	1.52691	0.0187562	0.104908	1.02594	3.70605	3.51532	0.193751	5.37138	22.0197	7.22138
Upper Griffins Road 307_24	77.4783	0.168575	12.6234	1.49727	0.038759	0.119182	0.998809	3.49031	3.58536	0.218634	5.72109	21.6096	7.07567
Upper Griffins Road 307_25	77.4793	0.19225	12.5972	1.41875	0.0255146	0.111276	1.03375	3.63874	3.50327	0.19596	5.88491	22.1163	7.14201
Average	77.5384	0.173875	12.5306	1.44316	0.0276455	0.114806	1.01121	3.69107	3.46928	0.192044	5.45668	22.3665	7.16034		5.83588	1106.65	2.50813	394.353	1.04741	5.51875	50.8647	16.1371	132.024	75.7176	35.2194	154.018	9.15529	1.86882	7.66471	657.588	29.2529	57.3294	6.81706	24.7706	4.72412	0.862353	5.03588	0.818059	5.22529	1.23294	3.63765	0.526176	3.37118	0.566471	4.81824	0.757706	1.66882	17.3153	12.3141
Standard Deviation	0.189049	0.0171377	0.0948776	0.0999348	0.0164343	0.0179704	0.04126	0.114527	0.097763	0.0167033	0.466854	0.619268	0.123652		2.12225	233.897	2.51303	43.4021	0.283675	5.88657	8.35306	1.84432	15.7085	10.9479	7.56129	8.35099	1.18519	0.320953	0.75539	52.882	6.79836	4.18013	0.749473	2.73902	0.804255	0.111273	1.38186	0.0925598	1.37092	0.14025	0.380732	0.0794247	0.769301	0.0664032	0.365859	0.118455	0.27638	5.29316	1.01295
Lower Griffins Road 309_1	76.2023	0.297937	13.2374	1.51024	0.039825	0.324809	1.51984	3.67373	3.19382	0.18852	5.62298	23.8593	6.86755
Lower Griffins Road 309_2	75.5933	0.311622	13.5742	1.51777	0.028042	0.32633	1.56239	3.75873	3.32758	0.198828	5.05977	22.7172	7.08631		4.94	1820	13.7	566	1.35	7.6	49.8	16.73	107.6	127.6	25.9	225	8.66	2.25	5.08	696	23.1	46.5	4.97	18	3.9	0.88	3.33	0.65	4.14	0.928	2.61	0.345	2.95	0.496	6.04	0.606	1.28	15.7	12
Lower Griffins Road 309_3	78.0978	0.126719	12.2379	1.18863	0.0287109	0.125768	0.827414	3.58384	3.78324	0.154905	5.45339	20.6431	7.36708		3.6	620	0.99	282	0.57	1.41	30	12.1	105.8	60.1	17.9	86.5	6.52	1.65	4.31	660	19.9	41.2	4.09	15.4	3.07	0.572	3.09	0.418	3.02	0.634	1.49	0.282	1.89	0.321	2.81	0.621	1.2	13.2	11.1
Lower Griffins Road 309_4	76.3485	0.281347	13.2545	1.26242	0.0415212	0.337824	1.51677	3.83348	3.12354	0.181784	5.70675	24.4429	6.95702		5.06	1818	5.28	598	0.9	1.24	53.5	15.94	122.6	137.8	24.7	198	8.02	2.06	5.88	730	24.8	45.3	5.3	19.3	3.8	0.97	3.98	0.626	4.21	0.823	2.55	0.422	3.1	0.57	5.08	0.76	1.31	16.4	11.93
Lower Griffins Road 309_5	76.8696	0.243526	13.1214	1.33507	0.0110037	0.220755	1.26364	3.54545	3.3895	0.132635	5.11898	22.6787	6.93495		5.27	1610	10.2	435	0.99	6.6	46.5	14.6	127	109.8	22.1	177	8.01	1.46	6.36	756	22.5	45.7	5.44	19.7	4.73	0.85	3.88	0.52	4.07	0.8	2.27	0.446	2.7	0.362	4.89	0.759	1.62	17.1	12.3
Lower Griffins Road 309_6	75.4403	0.337522	13.4797	1.44484	0.0191797	0.364166	1.64788	4.09576	3.17056	0.19588	4.73864	23.794	7.26632		5.1	1760	8.6	587	0.98	4.1	54	16.2	105.4	147.7	24.6	218.5	7.55	2.03	5.21	684	21.8	46.3	4.94	18.3	4.08	1.07	3.59	0.67	4.06	0.882	2.82	0.411	2.87	0.423	5.74	0.677	1.18	16.4	11.41
Lower Griffins Road 309_7	76.2118	0.316364	13.3894	1.34106	0.0347367	0.337609	1.49192	3.68697	3.19015	0.171881	5.3236	23.8897	6.87712		5.24	1660	4.78	570	0.7	1.49	47.5	15.9	120.3	126.2	25.1	205	7.44	2.11	5.41	651	23.2	45.2	5.06	17.6	3.93	1.01	3.73	0.537	4.1	0.81	2.63	0.388	2.7	0.421	5.46	0.68	1.29	14.28	11.95
Lower Griffins Road 309_8	76.2829	0.293524	13.4085	1.2597	0.0593688	0.283747	1.47535	3.76926	3.1677	0.186214	5.03689	24.0815	6.93696		5.25	1810	7.9	523	1.02	8.9	49.3	15.2	119	124.6	23.5	214	8.11	2.03	5.63	747	21.8	45.8	5.22	19.8	3.21	0.96	4	0.609	3.69	0.86	2.72	0.392	2.98	0.42	5.62	0.74	1.35	15.1	11.81
Lower Griffins Road 309_9	76.9814	0.235446	13.0107	1.12388	0.0333266	0.242597	1.26685	3.79604	3.30969	0.176612	6.01682	23.2594	7.10573		4.29	1167	4.76	399	0.97	2.68	32	14.3	111.9	95.5	22.5	170	7.45	2.04	4.84	717	22.4	46.7	4.43	16.6	3.66	0.8	2.98	0.535	3.55	0.811	2.12	0.267	2.71	0.395	4.78	0.635	1.31	15.3	12.57
Lower Griffins Road 309_10	76.5843	0.31792	13.2754	1.24687	0.018839	0.343901	1.43403	3.50716	3.27148	0.163514	5.78683	23.4097	6.77864		5.53	2300	31.5	479	2.64	18.9	45.4	20.5	114.4	109.1	22.5	200	8.18	2.03	5.33	685	21.5	42.3	5.14	18.6	3.38	0.89	3.64	0.5	4.13	0.765	2.38	0.405	2.14	0.366	5.39	0.75	1.14	15.4	13.06
Lower Griffins Road 309_11	76.4269	0.332129	13.3278	1.23246	0.0353167	0.318279	1.50855	3.72441	3.09413	0.19037	5.40036	24.7006	6.81855
Lower Griffins Road 309_12	76.6739	0.267184	13.053	1.35012	0.0404289	0.28934	1.40792	3.67835	3.23979	0.188757	5.74159	23.6663	6.91814
Lower Griffins Road 309_13	78.0569	0.172555	12.4678	0.883669	0.0329913	0.118355	0.85582	3.61006	3.80181	0.171407	5.0618	20.5315	7.41187		4.9	772	3.2	330	0.77	2.8	36.2	14.5	128.3	74.6	23.5	106.3	7.3	2.32	6.24	789	26.7	50.7	5.53	17	3.36	0.68	3.1	0.462	3.65	0.76	2.05	0.314	2.61	0.438	3.86	0.8	1.53	17.6	12.85
Lower Griffins Road 309_14	76.5769	0.284948	13.2131	1.2957	0.0390893	0.276127	1.42049	3.44088	3.45271	0.180778	5.18213	22.1788	6.89358		5.96	2140	22.4	534	1.38	46	46.5	19.2	131	139	25.5	211	9.04	2.2	6.45	847	26.3	46.2	5.69	21.3	4.37	0.94	4.44	0.67	4.32	0.85	2.98	0.416	3.03	0.47	6.4	0.92	1.59	19.5	12.8
Lower Griffins Road 309_15	77.3316	0.210637	12.6165	1.30714	0.0137106	0.167328	1.05276	3.56167	3.73866	0.181219	4.81409	20.6843	7.30033		3.87	927	3.32	311	0.92	2.37	31.1	13.6	107	74.3	23.1	131	6.48	1.9	5.25	647	23	43.9	4.17	16.9	3.47	0.513	2.8	0.54	3.54	0.75	1.84	0.28	2.43	0.32	3.8	0.56	1.35	14.2	12.3
Lower Griffins Road 309_16	76.2785	0.334701	13.2686	1.33178	0.0197885	0.333124	1.50159	3.66514	3.2668	0.140509	5.0314	23.3496	6.93195		5.27	1850	4.67	540	0.79	1.78	49.8	15.7	119.3	121.5	25.8	218	8.4	2.41	5.37	685	22.5	47.4	5.19	20.7	3.71	0.98	3.81	0.706	3.9	0.78	2.7	0.462	2.92	0.46	6.04	0.77	1.27	14.2	12.25
Lower Griffins Road 309_17	76.2464	0.285246	13.3047	1.28362	0.0220452	0.284479	1.42087	3.80766	3.345	0.135153	5.28135	22.7941	7.15266		4.89	1650	23	416	1.56	11.7	33.9	17.2	100.7	129	23.3	196	7.6	1.7	5.19	701	23.2	43.3	4.7	17.1	3.21	0.96	3.51	0.49	3.98	0.79	2.5	0.293	2.43	0.411	5.52	0.68	1.52	16.7	12.1
Lower Griffins Road 309_18	76.0446	0.307008	13.2518	1.35567	0.0515591	0.300316	1.52026	3.79711	3.37166	0.165286	4.82744	22.5541	7.16877		5.28	1890	11.4	605	1.02	8.4	53	17.4	120.7	133.4	27	197	8.14	2.22	5.35	731	25.9	44.3	5.11	19.06	3.91	0.91	3.94	0.608	4.41	0.823	2.73	0.391	2.5	0.499	5.18	0.722	1.35	17.4	12.45
Lower Griffins Road 309_19	76.3934	0.302734	13.3391	1.38193	0.0303832	0.325551	1.42751	3.60104	3.19834	0.179096	5.50291	23.8853	6.79939
Lower Griffins Road 309_20	76.1412	0.321712	13.2934	1.29829	0.044878	0.26763	1.47214	3.87511	3.28557	0.201318	4.61722	23.1744	7.16068		4.39	1590	4.69	546	0.73	1.58	45.2	14.2	106.9	117.6	24.6	173	7.28	1.9	5.03	644	22.8	41.1	4.34	18.2	3.37	0.756	3.07	0.552	3.81	0.742	2.15	0.385	2.78	0.521	4.9	0.661	1.13	14.3	10.81
Lower Griffins Road 309_21	76.148	0.310752	13.2863	1.35211	0.0169975	0.271564	1.41032	3.8281	3.37579	0.131042	4.79387	22.5571	7.2039
Lower Griffins Road 309_22	76.0716	0.301102	13.3242	1.31993	0.0261499	0.298283	1.44258	3.96886	3.24726	0.16077	4.17893	23.4264	7.21613		5.86	2060	19	570	1.68	24	57.4	20.3	129	142	26.1	210	9	2.07	6.49	815	26.4	45.1	5.23	20.8	4.54	1.03	4	0.627	5.07	0.78	2.75	0.378	3.17	0.501	5.72	0.8	1.71	21.5	12.3
Lower Griffins Road 309_23	76.3625	0.306303	13.3523	1.24797	0.0346211	0.331892	1.46174	3.76905	3.13364	0.187298	5.00752	24.3686	6.90269		4.42	1670	14	492	1.61	21	27.4	16.7	99	108.1	22.1	178	6.77	2.02	4.53	627	18.85	36.7	3.51	14.4	2.63	0.78	3.15	0.464	2.77	0.59	1.76	0.33	2.09	0.316	4.25	0.46	0.95	13.2	9.2
Lower Griffins Road 309_24	76.6298	0.286348	13.2818	1.30273	0.0137074	0.304787	1.47922	3.61979	3.08182	0.166364	4.79199	24.8651	6.70161		4.84	1468	5.02	528	0.93	1.42	48.3	14.3	104.6	125.1	23.8	206	7.31	1.97	5.59	686	23.2	46.8	4.81	18	3.57	0.98	3.42	0.585	4.35	0.886	2.76	0.382	3.06	0.396	5.26	0.63	1.25	16	12.01
Lower Griffins Road 309_25	76.304	0.285276	13.1698	1.25277	0.0398758	0.325334	1.42681	3.82032	3.37581	0.154388	4.43398	22.6031	7.19613		4.91	1560	4.72	525	1.04	2.03	53.5	16.3	112.6	127.3	25.4	210	7.78	2.01	6.14	728	24.1	49.7	4.77	18.4	3.88	0.89	3.83	0.59	4.22	0.82	2.64	0.401	2.58	0.397	6	0.63	1.27	16.4	12.8
Average	76.4919	0.282823	13.1816	1.29705	0.0310438	0.284796	1.39259	3.72072	3.31744	0.171381	5.14125	23.0575	7.03816		4.9435	1607.1	10.1565	491.8	1.1275	8.8	44.515	16.0435	114.655	116.515	23.95	186.515	7.752	2.019	5.484	711.3	23.1975	45.01	4.882	18.258	3.689	0.87105	3.5645	0.56795	3.9495	0.7942	2.4225	0.3695	2.682	0.42515	5.137	0.69305	1.33	15.994	12
Standard Deviation	0.616205	0.0506645	0.308336	0.123188	0.0122849	0.065116	0.200704	0.14848	0.198564	0.0206668	0.447727	3.10331	0.347044		0.595821	436.556	8.14956	97.859	0.472918	11.2024	9.24117	2.15747	9.91779	23.9009	2.02107	37.9239	0.726814	0.225316	0.617835	58.343	2.06745	3.10804	0.543668	1.7643	0.510788	0.148984	0.43442	0.0788499	0.501938	0.079092	0.402307	0.0572837	0.354499	0.0702966	0.891699	0.100826	0.185217	2.03855	0.872196
Onepuhi 267_2	74.6171	0.222553	13.9183	2.23368	0.058052	0.0780255	1.22093	4.16907	3.48232	0.21643	5.99015	21.4274	7.65139		5.42	1218	Below LOD	584	0.93	Below LOD	74.6	20.7	122.3	88	38.3	295.9	11.69	2.4	7.3	817	30.3	65.7	6.88	29.4	5.91	1.12	5.76	1.02	6.49	1.48	3.97	0.622	4.35	0.61	8.08	0.759	1.63	20.91	13.77
Onepuhi 267_3	77.998	0.12133	12.2906	1.02511	0.0196633	0.105315	0.95208	3.33694	4.15103	0.236586	5.3078	18.79	7.48796		6.3	1320	3.77	413	1.46	Below LOD	55.3	18.5	228	111	22	143	10.7	3	12.5	1200	33.2	59	6.8	24	3.73	0.63	3.54	0.53	4.19	0.616	3.1	0.49	3.16	0.473	4.7	1.23	2.19	24.6	20.1
Onepuhi 267_5	77.7444	0.0622854	12.6295	0.933857	0.0263188	0.0831613	0.841455	3.3355	4.34348	0.257082	4.85855	17.8991	7.67899
Onepuhi 267_6	77.6952	0.0952694	12.6166	1.07263	0.0343933	0.0779102	0.811658	3.26642	4.32985	0.267137	4.79319	17.9441	7.59627
Onepuhi 267_7	77.7653	0.0757212	12.7472	0.94393	0.0163527	0.0673467	0.880199	3.51331	3.99058	0.280239	5.76886	19.4872	7.50389		4.65	728	2.79	437	1.18	Below LOD	30.2	15.1	166	76.2	18.9	101.6	7.59	2.62	9.7	810	28.1	52	5.1	16.8	3.4	0.53	3.7	0.41	3.19	0.63	2.05	0.251	2.43	0.318	3.24	0.9	1.75	19.2	32
Onepuhi 267_9	74.5672	0.160124	13.6674	1.98784	0.0274441	0.0936568	0.993606	3.56134	4.94138	0.257254	4.08047	15.0903	8.50272
Onepuhi 267_10	76.49	0.27342	13.3345	1.45297	0.0313487	0.225699	1.56061	3.6355	2.99594	0.172312	5.78728	25.5312	6.63145		5.39	1570	8.7	495	1.67	Below LOD	21.4	17.6	123	122.4	22.8	172	8.43	1.5	5.81	777	23.2	46.7	4.83	17.5	2.54	0.57	3.74	0.399	3.4	0.71	2.48	0.307	2.56	0.42	4.26	0.604	1.11	14.1	9.98
Onepuhi 267_11	77.1451	0.122585	12.671	1.34143	0	0.0594257	0.958241	3.76427	3.93796	0.270294	4.30373	19.5901	7.70223
Onepuhi 267_12	76.7223	0.175838	12.904	1.35563	0.0466762	0.118964	1.15612	3.4517	4.06873	0.234896	5.08704	18.8566	7.52043
Onepuhi 267_13	76.3899	0.1528	13.317	1.93505	0.0524903	0.0840055	1.09395	3.69057	3.28422	0.216027	5.81461	23.2597	6.9748
Onepuhi 267_14	75.8407	0.238293	13.3536	1.93923	0.0161502	0.181398	1.5129	3.85734	3.06027	0.221188	4.58725	24.7824	6.91762
Onepuhi 267_15	77.6743	0.104588	12.7479	1.07284	0.0467227	0.081706	0.820414	3.37656	4.07492	0.256816	5.1814	19.0615	7.45149
Onepuhi 267_16	77.6964	0.11792	12.5061	1.05303	0.0282727	0.0553026	0.869603	3.38529	4.28801	0.26098	4.62062	18.1195	7.67329
Onepuhi 267_17	77.5783	0.0956427	12.5811	1.05698	0	0.0512746	0.860469	3.18246	4.59377	0.304702	5.16476	16.8877	7.77623
Onepuhi 267_18	77.9214	0.131763	12.5696	1.13366	0.034637	0.0714877	0.835935	3.16078	4.14068	0.208354	5.46286	18.8185	7.30145
Onepuhi 267_19	77.5356	0.126815	12.6527	1.075	0.065306	0.0630888	0.829756	3.22383	4.4279	0.259883	4.63464	17.5107	7.65174		4.52	663	5.7	402	1.9	6.7	34.5	15	164	65	18.2	92	7.7	2.42	8.8	730	23.9	44.1	4.83	14.9	2.63	0.48	2.16	0.39	2.47	0.398	1.54	0.205	1.91	0.322	3.09	0.96	1.94	17.8	16.1
Onepuhi 267_20	77.4909	0.13175	12.758	1.11364	0	0.0749673	0.852197	3.39973	4.17886	0.254121	5.45327	18.5435	7.57859
Onepuhi 267_21	77.9815	0.111204	12.3209	1.36305	0.057681	0.0452965	0.619632	3.82747	3.6733	0.216191	5.3854	21.2293	7.50077		6.6	780	Below LOD	449	0.18	5.39	79	19.1	146	43.3	45.6	188	13.6	2.3	8	950	35.2	73	8.7	36.7	9.8	0.94	7.6	1.41	8.1	1.53	4.63	0.84	5.04	0.75	5.4	1.12	1.93	23.4	13.7
Onepuhi 267_22	77.8795	0.124963	12.7107	0.948287	0.00135394	0.0669124	0.781096	3.36517	4.12199	0.267021	5.15732	18.8937	7.48716		4.02	756	0.36	392	0.46	Below LOD	47	13.05	93.1	51.1	27.3	192	8.98	1.65	5.32	589	21.3	46.3	5.18	20.7	4.38	0.82	4.4	0.708	4.52	1	2.63	0.416	2.9	0.457	4.92	0.601	1.21	15.5	10.3
Onepuhi 267_23	77.8037	0.122322	12.5518	1.02189	0.0102538	0.155315	0.845774	3.16688	4.32204	0.230454	6.07535	18.0016	7.48892
Onepuhi 267_24	77.8225	0.103037	12.4711	0.973575	0.0693786	0.0856328	0.828592	3.4294	4.21677	0.232769	3.75467	18.4555	7.64617
Onepuhi 267_25	75.225	0.157277	13.4359	2.08782	0.0180356	0.0788867	1.0741	4.11828	3.80466	0.197046	3.88214	19.7718	7.92294		6.22	1090	0.37	526	0.64	4.6	49.8	17.6	141.2	77.5	38	285	13.9	2.02	8.46	896	30.2	66.8	7.58	32.3	6.63	1.2	6.42	1.07	6.39	1.38	3.94	0.74	5.24	0.546	7.59	0.92	1.88	21.6	14.4
Average	77.072	0.137614	12.8525	1.32369	0.0300241	0.0911263	0.963605	3.5099	4.01949	0.241717	5.05233	19.4523	7.52939		5.39	1015.62	3.615	462.25	1.0525	5.56333	48.975	17.0813	147.95	79.3125	28.8875	183.688	10.3238	2.23875	8.23625	846.125	28.175	56.7	6.2375	24.0375	4.8775	0.78625	4.665	0.742125	4.84375	0.968	3.0425	0.483875	3.44875	0.487	5.16	0.88675	1.705	19.6387	16.2938
Standard Deviation	1.0919	0.0515848	0.44612	0.424133	0.0218416	0.043998	0.229595	0.29003	0.477799	0.0306224	0.667181	2.47329	0.367708		0.938342	333.051	3.22596	67.362	0.607024	1.06068	20.442	2.51367	40.231	27.3777	10.3643	75.48	2.54337	0.496802	2.26821	179.298	4.97874	10.974	1.46237	7.99213	2.46781	0.277228	1.7845	0.3834	1.95267	0.443745	1.06358	0.23282	1.26112	0.14597	1.83379	0.225766	0.37386	3.69564	7.10817
Kupe 481_1	77.1688	0.171133	12.6985	1.44555	0.0535632	0.0922558	0.961833	3.76181	3.64659	0.241148	5.30389	21.1619	7.4084		4.87	916	1.81	377	0.79	10	33.5	16.1	131	62.5	26.3	148	9.5	1.83	6.81	652	23.6	53.7	4.2	22.2	4.6	0.8	3.87	0.58	4.14	0.85	2.46	0.49	3	0.38	3.33	0.64	1.5	18	10.3
Kupe 481_2	76.6557	0.139147	13.0302	1.62897	0.0176211	0.105267	0.992973	3.62024	3.80988	0.205633	5.2645	20.1202	7.43011
Kupe 481_3	77.1353	0.144549	12.6404	1.31059	0.0403899	0.100237	0.95171	3.83206	3.84478	0.2485	4.62143	20.0623	7.67684		5.21	929	1.35	337	0.81	6.9	38.8	17.3	141.7	61	33.8	149	10.3	2.31	7.4	615	28.4	59.3	4.19	28	5.17	0.79	5.4	0.85	5.51	1.14	3.57	0.5	3.21	0.56	4.69	0.8	1.76	20.3	14
Kupe 481_4	77.9781	0.1218	12.2602	1.15298	0.0313107	0.054172	0.739489	3.21212	4.44977	0.262744	5.67289	17.5241	7.66189
Kupe 481_6	77.9633	0.16005	12.2972	1.21856	0.031269	0.0689337	0.646873	3.229	4.38481	0.260102	5.54704	17.7803	7.61381
Kupe 481_7	76.7928	0.183199	12.7949	1.49523	0.0493054	0.0927691	0.960313	3.4559	4.17547	0.241362	4.93945	18.3914	7.63137
Kupe 481_8	77.2126	0.167401	12.8814	1.10094	0.0305086	0.114933	0.903608	3.54182	4.04672	0.242597	3.19285	19.0803	7.58855
Kupe 481_9	77.6148	0.140111	12.3563	1.42191	0.0311064	0.0841998	0.864883	3.75475	3.73199	0.25419	5.05319	20.7971	7.48674		7.09	1130	0.95	417	0.77	3.15	46.2	20.6	204	48.6	43.1	157	12.7	2.62	11.6	831	38.4	84	6.63	36.9	7.3	0.91	6.9	1.06	7.31	1.57	3.72	0.86	4.88	0.702	5.42	1.28	2.19	24.5	19.6
Kupe 481_10	77.2083	0.147393	12.6222	1.49062	0.0224546	0.0987002	0.966368	3.41036	4.03355	0.259216	5.64163	19.1415	7.44392		7.07	1052	3.4	404	1.14	36.2	37.1	20.7	186	89	34.5	164	12.1	2.79	10.52	745	30.6	68.3	5.13	29.2	5.91	0.79	6	0.87	5.64	1.27	3.92	0.6	3.18	0.59	4.33	0.99	2.12	23.5	15.2
Kupe 481_11	78.3531	0.109293	12.3598	1.18264	0.0416405	0.0595858	0.729571	3.51986	3.64446	0.257748	5.94411	21.4993	7.16432
Kupe 481_12	78.1765	0.106948	12.3115	1.14283	0.040747	0.0677393	0.73214	3.68441	3.73714	0.25447	3.88173	20.9188	7.42155
Kupe 481_13	78.2024	0.155289	12.2481	1.04147	0.0304093	0.046842	0.672346	3.56954	4.03355	0.27338	4.98801	19.388	7.60309		3.28	680	1.36	233	0.68	8	14.9	8.9	75	45	14.1	103	5.1	0.97	3.5	302	12.8	29.8	1.96	11.9	2.8	0.572	2.6	0.33	2.43	0.49	1.37	0.253	1.58	0.236	2.25	0.4	0.37	8.6	4.7
Kupe 481_14	77.9975	0.10712	12.2869	1.22618	0.0230187	0.072132	0.659475	3.72563	3.90208	0.27503	5.16465	19.9887	7.62772		6.09	950	1.1	351	1.34	1.3	50.6	17.3	145	58.6	32.7	166	10.3	2.38	8.95	654	29.9	67.4	4.99	26	5.14	0.87	5.1	0.79	5.98	1.19	3.66	0.52	3.9	0.55	4.83	0.79	2.4	20.8	15
Kupe 481_15	78.4574	0.116925	12.2344	1.30914	0.0416111	0.0683002	0.826483	3.46428	3.48139	0.235719	5.87766	22.5362	6.94567		5.52	960	1.55	387	1.07	5.3	43.5	20.4	148	60.7	35.1	156	10.74	2.89	8.21	665	31.4	63.3	5.05	28.4	6.2	0.81	5.39	0.94	6.33	1.27	3.66	0.62	4.18	0.6	5.3	0.87	1.69	22	15.1
Kupe 481_16	77.0719	0.16969	12.7844	1.49871	0	0.088889	0.990406	3.5094	3.88655	0.249314	4.49879	19.8304	7.39595		6	1070	2.1	422	0.87	Below LOD	Below LOD	18.6	157	71	28.2	162	9	2.05	8.5	1140	26.6	56	9.8	19.9	3.5	0.63	3.48	0.83	3.84	0.87	3.1	0.4	2.5	0.32	3.5	0.53	1.48	18.6	10.2
Kupe 481_17	77.1519	0.148633	12.7193	1.45665	0.016861	0.095232	0.985981	3.68089	3.7445	0.258066	4.80164	20.6041	7.42539		5.97	1068	1.11	365	1.05	5.8	39.7	18.8	171	57.8	34.3	162	10.1	2.48	8.6	1430	30.1	65.6	12.5	27.2	4.75	0.69	5.55	0.87	5.06	1.23	3.3	0.64	3.89	0.45	4.67	0.89	1.59	20.8	14.3
Kupe 481_18	77.1569	0.162659	12.4847	1.34608	0.0331605	0.0860201	0.963402	3.44392	4.32321	0.309759	7.06237	17.8471	7.76713		4.73	1020	5.2	315	1.54	54	37	15.7	136	95	27	111	8.8	1.96	7.3	1030	23.1	54	6.4	21.4	4.1	0.53	3.2	0.59	3.7	0.83	2.1	0.37	2.6	0.49	3.6	0.52	1.32	16.6	10.5
Kupe 481_19	76.8736	0.139785	12.8559	1.44126	0.0249684	0.101494	0.903759	3.17878	4.48044	0.198747	7.4273	17.1576	7.65922		6.58	1313	2.25	450	1.12	17.1	40.7	21.3	173	82.9	37.3	208.2	11.95	2.73	8.9	1908	31.7	71.1	13.57	30.4	5.9	0.86	5.6	0.88	5.63	1.13	3.95	0.61	4.47	0.53	5.46	0.9	1.77	21	14.63
Kupe 481_20	76.3307	0.317137	13.0949	1.59969	0.0180394	0.142368	1.27696	3.59727	3.62293	0.137398	3.90202	21.0688	7.2202		7.6	1200	1.27	483	1.14	8.6	58.7	25.5	222	59.6	50.7	173	14.9	2.89	12.1	2530	43.2	88.7	17.3	39.7	7.98	0.98	7.67	1.3	7.96	1.77	5.51	0.75	6.27	0.83	6.4	1.26	2.76	31.1	21.3
Kupe 481_22	77.8534	0.138214	12.2543	1.16628	0	0.0717239	0.701117	3.54262	4.27226	0.285957	4.62515	18.223	7.81489		3.61	631	1.78	262	0.9	15.4	27.2	10.6	81	62	19	111	5.8	1.51	4.85	1040	17	37.1	6.42	14.9	3.07	0.53	2.36	0.5	3.24	0.69	2.24	0.329	2.55	0.325	3.04	0.44	0.83	12.2	7.9
Kupe 481_23	77.587	0.16529	12.7171	1.3517	0.0361728	0.0851277	0.984671	3.26067	3.81219	0.23712	4.15181	20.3523	7.07286		4.54	980	1.74	393	0.94	7.1	28.2	15.8	115	65.7	26.6	162	8.8	2.14	5.9	1290	22.3	45.9	7.1	19.3	3.75	0.8	3.61	0.61	3.25	0.8	1.88	0.4	2.86	0.32	3.51	0.74	1.14	15.7	9.8
Kupe 481_24	77.7375	0.165153	12.1931	1.32786	0.0307882	0.0945076	0.853888	3.75328	3.8439	0.267385	4.07194	20.2236	7.59718
Kupe 481_25	78.2986	0.159523	12.2843	1.20619	0.00880782	0.071316	0.77739	3.55201	3.6418	0.240973	5.23522	21.5	7.19381		4.86	840	1.33	325	0.95	15.3	32.5	16.4	137	56.6	29.7	144	9.9	2.37	8.2	1293	27.4	60.4	7.64	24.6	4.7	0.59	4.8	0.86	5.3	1.13	3.02	0.514	3.58	0.448	4.32	0.64	1.33	20.2	13.5
Average	77.5208	0.153758	12.5396	1.32878	0.0284241	0.0853368	0.87155	3.53481	3.93695	0.247676	5.08127	19.7912	7.47177		5.53467	982.6	1.88667	368.067	1.00733	13.8679	37.7571	17.6	148.18	65.0667	31.4933	151.747	9.99933	2.26133	8.08933	1075	27.7667	60.3067	7.52533	25.3333	4.99133	0.743467	4.76867	0.790667	5.02133	1.082	3.164	0.523733	3.51	0.488733	4.31	0.779333	1.61667	19.5933	13.0687
Standard Deviation	0.600057	0.0417938	0.283131	0.163003	0.0139272	0.0213504	0.149778	0.18639	0.289426	0.0334824	0.975773	1.44536	0.225936		1.26142	178.028	1.10042	67.0857	0.229268	14.4301	10.7178	4.14384	40.3557	14.0001	8.93552	26.9012	2.47906	0.538687	2.3185	569.461	7.60072	15.6182	4.11387	7.47526	1.48314	0.143488	1.54573	0.23885	1.57027	0.334839	1.03686	0.16204	1.15086	0.159849	1.10404	0.265988	0.60685	5.25391	4.29074
Kaukatea 232_1	76.4048	0.145233	13.1359	1.61688	0.0279759	0.112989	0.970156	3.83214	3.75388	0.20358	5.90383	20.3536	7.58602		5.91	1035	0.77	483	0.57	3.46	55.5	18.8	133	70.6	33.6	192	10.96	1.97	7.04	580	28.1	62.1	6.69	28.8	5.69	1.06	6.39	0.96	5.48	1.24	3.77	0.66	3.41	0.518	5.38	0.96	1.42	20.8	12.9
Kaukatea 232_2	76.4934	0.165161	13.3757	1.56513	0.0575424	0.0747438	1.03004	3.8298	3.40847	0.185907	6.27328	22.4422	7.23827
Kaukatea 232_3	76.2859	0.163868	13.2849	1.69967	0	0.0950978	1.02853	4.09027	3.35174	0.181015	5.53395	22.7601	7.44201		6.41	1066	0.99	527	0.78	5.6	59.4	18.5	135.1	79.1	37.4	207	11.74	2.15	7.62	591	30.3	65.3	7.21	28.2	6.26	1.13	6.55	0.95	5.95	1.26	4.06	0.58	3.9	0.581	5.81	0.96	1.43	21.7	13
Kaukatea 232_4	76.5571	0.165226	13.1895	1.73044	0.0393695	0.101074	1.03524	3.84681	3.33522	0.193266	7.04205	22.9541	7.18204		5.43	993	0.41	499	0.604	2.12	53.6	18.5	123.3	75.4	36	190.9	12.11	1.92	6.74	580	29.2	62.6	6.23	27.9	6.2	0.94	5.66	1.02	6.02	1.24	3.42	0.507	3.6	0.491	5.36	0.87	1.67	22	13.22
Kaukatea 232_5	76.4666	0.147884	13.2822	1.47978	0.0614439	0.106916	1.04409	4.19842	3.21258	0.172619	5.95495	23.8022	7.41101		6.69	1174	1.6	532	0.78	11	65.3	19.3	143	90.4	39	221	13.7	2.26	8.3	714	32.4	70.7	7.93	33.9	6.85	1.16	7.38	1.04	6.08	1.21	4.61	0.68	4.35	0.58	6.72	0.91	2.03	24.8	13.2
Kaukatea 232_6	76.5542	0.152092	13.2742	1.56237	0.0321613	0.0764192	1.03661	4.11901	3.19297	0.190318	6.17107	23.9759	7.31198		5.71	1236	0.92	483	0.87	2.01	57.6	19.4	132.6	77.1	35.4	229.2	11.86	2.23	6.74	556	28.3	63.3	7.35	29.1	5.69	0.906	6.4	0.96	6.01	1.245	3.65	0.56	3.58	0.562	6	0.81	1.47	22.1	12.94
Kaukatea 232_7	76.1347	0.194094	13.2391	1.62838	0.03593	0.0852815	1.00957	4.16708	3.50586	0.167981	5.29104	21.7164	7.67293		5.56	1006	2.3	498	1.15	11.3	42.6	19.7	131	77.6	34.6	200	11.8	1.58	6.57	592	27.4	65.3	7.01	26.3	6.2	1.07	5.7	0.97	5.24	1.3	3.32	0.45	4.11	0.48	5	0.74	1.36	20.6	11.3
Kaukatea 232_8	76.9847	0.134366	13.1412	1.52059	0.0281224	0.0730793	0.88938	3.72798	3.50059	0.195396	6.394	21.9919	7.22857		5.45	919	3	445	0.64	12.8	51.1	15.8	110.3	69.8	30.4	176	9.68	1.81	6.1	539	26.5	56	7.54	24.7	5.32	1.05	5.12	0.768	5.7	1.04	3.72	0.554	3.19	0.525	5.09	0.84	1.21	19.5	11.37
Kaukatea 232_9	76.4508	0.179063	13.1681	1.60694	0.0325935	0.092394	0.993785	3.90581	3.57056	0.185424	5.4455	21.4114	7.47637		6.57	1260	14	528	1.85	70	52.7	20	132	83.1	35.3	204	11.8	2.15	8.09	643	30.1	63.5	8.58	29.1	5.72	1.29	6.3	0.823	6.57	1.15	3.95	0.55	3.58	0.57	6.19	0.93	2.2	26.1	12
Kaukatea 232_10	76.4115	0.18554	13.2546	1.58821	0.0355704	0.0957106	1.03186	3.7914	3.60557	0.178722	6.13878	21.1926	7.39697		5.91	1170	3.7	516	0.92	16.5	56.7	20.5	128.6	77.4	37.3	202	12.2	2.05	7.04	710	31.3	67.3	8.7	29.7	6.35	1.03	5.77	0.95	6.29	1.37	3.8	0.64	3.69	0.66	5.22	0.92	1.63	23.8	14.6
Kaukatea 232_11	76.2189	0.147172	13.3568	1.69486	0.0366887	0.0907025	1.01725	4.09455	3.34301	0.182095	5.49957	22.7995	7.43756		6.15	1008	0.43	492	0.66	2.2	61.4	18.1	127.8	81.5	37.3	212	11.45	2.3	7.1	711	29.7	66.3	8.51	30	6.56	1.03	6.73	0.97	6.56	1.28	4.04	0.614	4.22	0.59	6.03	0.96	1.72	22.08	13.02
Kaukatea 232_12	76.0678	0.181328	13.2197	1.69788	0.0525712	0.104292	1.05619	4.16385	3.45639	0.18989	5.95952	22.0079	7.62024		6.49	1170	5.9	548	0.85	Below LOD	51.5	20.2	149	85.6	39.1	218	11.5	2.11	8	892	33.1	67.5	6.81	30	6.9	1.19	7.25	0.97	6.6	1.24	4.36	0.47	3.69	0.66	5.71	1.01	1.52	23.8	13.6
Kaukatea 232_13	76.446	0.166723	13.1457	1.66824	0.0356797	0.101289	1.07247	4.03218	3.33169	0.174645	6.42613	22.9451	7.36387		6.82	1310	3.8	553	0.93	Below LOD	68.7	20.9	145.5	93.5	39.1	227	13.28	2.56	8.43	947	34	70.9	6.3	32.3	8.18	1.31	6.76	1.13	7.22	1.33	4.35	0.68	4.65	0.689	6.47	1.01	1.8	26.5	14.31
Kaukatea 232_14	76.3921	0.163562	13.3806	1.55163	0.0382894	0.114977	1.02372	4.0993	3.23578	0.199388	6.09661	23.6085	7.33508		6.46	1114	0.56	488	0.66	2.36	65.7	18.2	140.1	84.7	36.8	218	13.64	1.8	7.84	912	31.2	69.8	5.91	32.4	7.27	1.17	5.86	1.04	6.19	1.27	4.16	0.64	4.31	0.62	6.15	0.93	1.95	23.2	13.43
Kaukatea 232_15	76.3229	0.150098	13.2959	1.59921	0.0398435	0.116399	1.00538	4.02721	3.44301	0.191062	6.53635	22.1675	7.47022		5.93	988	0.53	477	0.579	1.43	64.6	18.2	126.8	81.6	36.3	215	11.52	2.11	7.27	761	30.9	66.4	5.3	28.2	6.01	1.19	5.86	0.89	6.19	1.3	4.01	0.536	4.22	0.555	5.74	0.809	1.64	22.8	13.32
Kaukatea 232_16	76.0469	0.175619	13.4336	1.57695	0.0503611	0.0960957	1.05499	3.96754	3.59791	0.195018	5.65721	21.1364	7.56545		6.1	1148	0.52	492	0.71	1.9	60.4	18	139.8	79.4	35.9	211	12.1	2.47	8	744	31	68.7	5.92	30.7	6.72	1.29	6.34	0.99	6.8	1.33	3.85	0.59	4	0.531	6.26	1.05	1.97	21.6	13.9
Kaukatea 232_17	76.686	0.189509	13.1809	1.63293	0.018606	0.105265	1.0196	4.01157	3.15565	0.203277	6.82865	24.3011	7.16723		5.83	959	0.42	471	0.816	1.57	61.4	18.5	122.6	81.2	36.2	212.8	11.11	2.13	7.23	698	30.3	65.7	5.22	27.9	6.21	1.12	5.87	0.993	6.31	1.32	3.99	0.535	3.93	0.598	6.44	0.815	1.53	22.2	12.91
Kaukatea 232_18	76.5626	0.155452	13.2874	1.56178	0.0357626	0.0776884	0.994393	3.88779	3.43717	0.190121	6.64314	22.2749	7.32497		5.87	1051	0.58	466	0.6	1.92	59.4	18.1	131.3	76.1	35.3	195.3	11.58	1.93	6.91	645	28.7	62.6	5.14	29	5.65	1.11	6.04	0.883	6.33	1.24	3.77	0.632	3.48	0.603	5.64	0.84	1.69	20.8	12.63
Kaukatea 232_19	76.4426	0.164004	13.2598	1.55583	0.04662	0.0959264	1.04079	4.05897	3.33547	0.197616	6.34991	22.9181	7.39444		5.71	984	0.43	479	0.76	2	60.7	19.5	125	80.2	37.7	211	11.39	2.01	6.92	685	30.6	67.3	5.27	28.9	6.06	1.07	5.61	0.909	6.17	1.236	3.86	0.6	4.07	0.604	6.12	0.81	1.55	22.4	13.7
Kaukatea 232_20	76.349	0.172398	13.0719	1.59606	0.0366103	0.0896385	1.0042	3.86995	3.81013	0.211418	5.29724	20.0385	7.68008		6.65	1210	1.73	577	0.74	9.7	61.9	20.6	156	94	38.5	212	13.9	2.57	7.68	759	34.6	69.7	6.49	33.6	6.9	1.28	7	1.06	6.9	1.4	3.62	0.509	4.35	0.66	6.06	1.09	1.83	27.3	12.9
Kaukatea 232_21	76.5929	0.180005	13.2021	1.51671	0.026813	0.0935482	1.04371	4.09274	3.25147	0.187741	6.61212	23.5564	7.34422		6.84	1183	0.66	543	0.71	2.8	75.3	19.8	146	94.8	39.3	223	13.24	2.14	7.7	813	33.4	70	6.92	31.3	7.22	1.28	5.9	1.15	6.58	1.45	4.45	0.64	4.63	0.634	6.39	1	1.86	25.1	14
Kaukatea 232_22	76.0465	0.171452	13.2017	1.66622	0.0658902	0.0924279	1.03557	4.0668	3.65339	0.194652	5.48023	20.8153	7.72019
Kaukatea 232_23	76.4171	0.192398	13.2546	1.55583	0.0197478	0.090908	1.013	4.17898	3.27746	0.182507	5.71311	23.3159	7.45645
Kaukatea 232_24	76.1866	0.142688	13.3456	1.7029	0.0162328	0.10245	1.01593	4.04744	3.44013	0.184697	5.073	22.1464	7.48757
Kaukatea 232_25	76.1992	0.193509	13.4429	1.78141	0.0143827	0.0720914	0.970487	4.18858	3.13741	0.195106	6.25451	24.2873	7.32599
Average	76.3888	0.167138	13.257	1.61427	0.0353923	0.0942962	1.01748	4.01185	3.41374	0.189338	6.02303	22.4368	7.42559		6.1245	1099.2	2.1625	504.85	0.80895	8.92611	59.275	19.03	133.94	81.655	36.525	208.86	12.028	2.1125	7.366	703.6	30.555	66.05	6.7515	29.6	6.398	1.1338	6.2245	0.9713	6.2595	1.27255	3.938	0.58135	3.948	0.58555	5.889	0.9132	1.674	22.959	13.1125
Standard Deviation	0.216346	0.0172504	0.09527	0.0746984	0.0152476	0.0127	0.0363815	0.13808	0.180525	0.0101832	0.524629	1.18359	0.15265		0.458825	112.419	3.16249	34.0746	0.283726	15.9607	7.16452	1.20092	10.6822	7.14839	2.16768	13.3029	1.05548	0.250239	0.631201	119.293	2.19269	3.67273	1.12628	2.30149	0.689528	0.117717	0.591265	0.0918804	0.473736	0.0880045	0.333665	0.067602	0.411334	0.0583776	0.488369	0.0939824	0.249935	2.10667	0.851456
Potaka 305_1	77.8	0.134134	12.6372	1.36373	0	0.0922898	0.984537	3.60817	3.37993	0.244689	6.23179	23.0182	6.98809		5.24	866	1.81	298	1.34	Below LOD	31.4	15.9	141	67.6	23.4	118.7	8.73	2.15	8.56	1120	28.9	56.4	9.6	22.6	3.61	0.64	4.02	0.533	3.84	0.78	2.56	0.325	2.65	0.46	3.97	0.81	1.31	18	13.3
Potaka 305_2	77.6956	0.142277	12.5858	1.23142	0.0142903	0.0969601	0.980632	3.62533	3.62766	0.261528	5.64829	21.4176	7.25299
Potaka 305_3	77.6297	0.128214	12.4098	1.19254	0.0357192	0.0891068	1.0004	3.63338	3.88117	0.241973	4.73213	20.0016	7.51456		5.17	961	2.12	341	0.96	2.54	46.5	16	150	82.6	25.1	123.7	9.77	2.24	8.38	1509	31.3	57	12.8	23.9	5.57	0.57	2.93	0.65	4.36	0.89	2.88	0.366	2.78	0.45	3.88	0.93	1.97	22	14
Potaka 305_4	77.6026	0.15542	12.4982	1.12686	0.0500485	0.0928947	1.02022	3.76491	3.68879	0.242829	5.068	21.0374	7.4537		6.06	1070	3.19	376	1.64	51	34.3	21.4	194	82.6	24.9	140	11.7	1.97	10.7	1680	30.6	63.3	14.5	25.2	4.81	0.77	4.1	0.7	3.8	0.75	2.34	0.414	2.52	0.55	4.05	1.06	1.98	22.2	16.1
Potaka 305_5	77.5792	0.149935	12.5103	1.20303	0.0195627	0.0978494	0.988349	3.59574	3.85605	0.245611	4.82119	20.1188	7.45178		5.51	990	1.91	384	1.29	25	34.9	20.6	183	84	22.6	123	10.8	2.21	10.9	1560	30.6	56.2	15.2	23.8	4.7	0.68	3.79	0.53	3.24	0.85	2.3	0.39	2.79	0.4	4	0.93	2.09	26.7	13.2
Potaka 305_6	77.639	0.126271	12.5696	1.287	0	0.086922	1.00841	3.53181	3.75097	0.247687	5.18217	20.6984	7.28278		5.6	1050	2.28	349	1.71	Below LOD	30	19.7	175	82	27.6	141	10.05	2.6	9.9	1530	31.3	64.6	15.1	26.7	4.38	0.7	3.68	0.69	3.83	0.95	3	0.397	2.54	0.53	4.16	1.06	2.12	22.7	15.4
Potaka 305_7	77.6282	0.152975	12.8152	1.2487	0.00409484	0.100747	1.09301	3.66583	3.29122	0.23238	5.92245	23.5865	6.95705		5.6	990	2.82	340	1.31	18	34	15.8	155	91	22.6	140	10.8	1.97	9.3	1500	28.3	54.1	12.8	21.8	3.15	0.76	3.3	0.608	4.29	0.87	2.4	0.32	3.3	0.39	3.68	0.83	1.73	22.3	11.7
Potaka 305_8	77.3472	0.1695	12.7401	1.19474	0.01977	0.126889	1.13119	3.75152	3.51905	0.25166	5.81889	21.9796	7.27056		5.76	992	2.55	366	1.4	3.41	51.2	19	160	88.4	28	150	11	2.9	11	1520	32.5	70.7	15.1	25.1	4.52	0.91	4.42	0.693	4.39	1.07	3.63	0.412	3.73	0.56	4.67	1.02	2.21	23.1	16.1
Potaka 305_9	77.5907	0.148264	12.615	1.22269	0.0379994	0.0679409	1.0127	3.53728	3.76738	0.229904	5.38	20.5954	7.30466		4.77	761	1.47	335	1.49	10.2	37	18.3	180	66.8	27.9	107	9.7	2.22	10.7	1430	33.4	70.1	11.48	24	5.1	0.83	3.75	0.67	3.96	0.87	2.85	0.38	2.89	0.54	3.79	0.9	2.19	22.2	16.3
Potaka 305_10	77.4042	0.131922	12.7266	1.37734	0.0435182	0.0951406	1.08573	3.72649	3.40908	0.223505	5.57637	22.7053	7.13556		6	1030	3.34	382	1.55	15.1	43.4	18.3	169	99	26.2	147	10.8	2.13	10.2	1280	32.7	60.1	10.4	24.9	4.99	0.77	5.1	0.74	4.91	1.05	2.93	0.405	3.11	0.43	4.26	1	1.92	24.4	14.7
Potaka 305_11	77.6363	0.132701	12.6451	1.23986	0.062243	0.123799	0.91323	3.52589	3.72083	0.23059	6.13088	20.8653	7.24673		5.92	970	2.14	359	1.41	11.8	37	17.8	169	73.9	24.2	133	10.5	1.84	9.9	851	29.2	61.4	5.54	23.7	4.84	0.68	3.52	0.69	3.94	0.99	3.04	0.433	3.3	0.414	4.53	0.95	1.91	23.8	14.9
Potaka 305_12	77.6515	0.119376	12.7452	1.12119	0.0475324	0.107882	1.01814	3.63978	3.54944	0.238043	6.79667	21.8771	7.18922		5.1	846	1.99	326	1.31	3.24	45.1	17.1	143	77.5	25.4	133.1	9.43	2.84	9.33	760	29.6	59.4	4.79	21.7	4.68	0.75	3.83	0.585	4.77	0.88	2.92	0.313	3.16	0.457	4.51	0.87	1.64	22	14.9
Potaka 305_13	77.4359	0.126786	12.7328	1.37196	0.0326355	0.102113	1.13472	3.48464	3.57838	0.237236	5.56722	21.6399	7.06302		6.18	982	2.55	384	1.38	10.6	42	19.1	165	85.5	27.2	148	10.23	2.41	10.39	816	32.7	65.5	5.45	23.8	5	0.81	4.89	0.63	4.17	0.89	2.96	0.43	2.99	0.497	5.08	0.9	2.3	26	16.6
Potaka 305_14	77.8274	0.163712	12.6246	1.19314	0.0400621	0.10198	0.991588	3.66073	3.39679	0.25524	5.44382	22.912	7.05752		5.7	970	2.29	319	1.2	22	30.2	17.2	148	77.3	24.8	127	9.9	2.08	8.92	762	30.2	59.7	4.95	22.9	5.06	0.52	4.01	0.73	4.38	0.78	2.65	0.328	3.44	0.358	3.65	0.81	1.85	22.4	13.7
Potaka 305_15	77.2837	0.115996	12.6616	1.30604	0.0243621	0.105111	1.07837	3.85137	3.5734	0.213312	5.12341	21.6275	7.42477		5.61	1019	2.24	366	1.46	13.1	44.4	19.3	180	85.4	27.5	141.3	12	2.17	10.7	848	32.4	65.1	5.69	28.4	4.89	0.81	5.44	0.75	3.97	0.94	2.98	0.378	2.97	0.41	4.13	0.94	2.29	24.2	15.5
Potaka 305_16	77.1974	0.148656	12.7327	1.34768	0.0258535	0.0864608	1.02739	3.60921	3.82462	0.251155	5.62963	20.1843	7.43383		4.75	822	2.72	335	1.43	29	24.8	17.8	150	70	22.2	118	8.4	2.01	8.5	649	24.5	53.6	4.39	20.5	3.6	0.73	3.24	0.53	3.5	0.67	2.33	0.306	2.12	0.39	3.05	0.75	1.51	19.1	11.4
Potaka 305_17	77.4177	0.141065	12.7054	1.25288	0.0309185	0.114656	1.12133	3.68667	3.52932	0.23858	6.55275	21.9356	7.21599		6.03	1012	2.88	384	1.38	14	41.3	20.7	184	90.3	29.4	153	11.3	2.5	11.2	879	35.3	67.6	6.41	26.4	5.8	0.77	4.5	0.7	4.04	1.01	2.89	0.53	3.13	0.49	4.49	1.06	2.23	25.3	16.5
Potaka 305_18	77.2112	0.140571	12.8129	1.50612	0.0312084	0.10799	1.05498	3.26115	3.87386	0.231008	5.36368	19.9313	7.13501		5.8	984	2.34	371	1.4	8.1	44.4	19.6	176	89.8	29.8	138.5	11.3	2.06	9.94	790	31.8	59.8	5.91	23.9	5.05	0.76	5.15	0.73	4.85	0.92	2.8	0.38	3.33	0.53	4.16	0.95	1.95	25.6	15.6
Potaka 305_19	77.3688	0.146541	12.6851	1.27744	0.0223248	0.0877088	1.00529	3.57062	3.83611	0.238332	5.09309	20.1685	7.40673		4.68	761	2.02	269	1.28	29	18.7	13.4	126	69	18.4	103	7.7	1.6	7.58	583	21.4	41.7	4.99	17	3.24	0.5	2.19	0.44	3.44	0.55	1.78	0.31	2.52	0.3	3.21	0.56	1.05	14.4	9
Potaka 305_20	78.1021	0.114637	12.5402	0.990598	0.0205148	0.0851462	0.773647	3.10897	4.26417	0.242062	6.10854	18.3159	7.37315		4.94	707	1.76	304	1.24	53	22.8	19.9	177	64.6	23.2	90	8.9	2.83	11	783	30.5	74	5.71	23.8	4.18	0.45	3.5	0.61	2.9	0.63	2.5	0.283	2.78	0.374	2.52	0.81	1.79	24.2	13.74
Potaka 305_21	77.7342	0.127222	12.5408	1.20557	0.012833	0.0797647	1.00693	3.58112	3.71156	0.255026	4.94014	20.9438	7.29268		4.9	900	2.03	284	1.13	2.66	40.4	15.19	142.1	68.4	25.3	124.1	9.11	2.22	8.4	743	26.3	55.8	6.01	22.4	3.96	0.71	4.48	0.722	3.95	0.904	2.87	0.456	3.21	0.453	3.91	0.833	1.91	18.9	14.42
Potaka 305_22	77.8312	0.158184	12.6256	1.19023	0.0498415	0.096407	0.972946	3.51666	3.5589	0.239383	5.9619	21.8695	7.07556
Potaka 305_23	78.0569	0.145624	12.7182	1.07024	0.0117348	0.118736	1.00028	3.45676	3.42154	0.233876	6.98693	22.8134	6.8783
Potaka 305_24	77.9279	0.140981	12.4938	1.18931	0.0122476	0.0986975	1.01657	3.51137	3.60904	0.225948	5.63911	21.5924	7.12041
Average	77.6083	0.14004	12.6405	1.23793	0.0270548	0.0984663	1.01753	3.57939	3.6508	0.239648	5.65496	21.3265	7.23019		5.466	934.15	2.3225	343.6	1.3655	17.875	36.69	18.1045	163.355	79.785	25.285	129.97	10.106	2.2475	9.775	1079.65	30.175	60.805	8.841	23.625	4.5565	0.706	3.992	0.64655	4.0265	0.8622	2.7305	0.3778	2.963	0.44915	3.985	0.89865	1.8975	22.475	14.353
Standard Deviation	0.244584	0.0146795	0.106196	0.109251	0.0166775	0.0138372	0.075258	0.155764	0.214875	0.0111763	0.600187	1.22475	0.173976		0.484924	105.055	0.484256	35.0104	0.169255	15.0024	8.56485	2.0821	18.1924	9.78228	2.78289	16.7705	1.15197	0.341958	1.08562	373.432	3.21229	7.30094	4.12288	2.41048	0.728894	0.118339	0.803647	0.0861067	0.519334	0.136119	0.387576	0.0609077	0.384572	0.0713363	0.586672	0.121883	0.327171	2.99049	1.94695
Rewa 304_1	76.3792	0.192624	13.1857	1.76696	0	0.0918899	1.13672	3.97745	3.26947	0.173528	5.82373	23.3614	7.24692		6.06	1080	0.83	520	0.92	2.61	62.8	19.5	130	96.9	36.4	223	11.6	1.84	7.9	906	31.7	63.2	7	30.4	6.5	1.21	5.74	1.1	6.59	1.206	3.39	0.57	4.51	0.583	5.64	0.772	1.95	22.7	13.4
Rewa 304_2	76.0145	0.147792	13.381	1.78832	0.0416193	0.0691895	1.09271	3.91486	3.54995	0.15411	5.8963	21.4128	7.46482		6.02	956	1.22	463	1.18	4.45	36.5	17.2	125	74.3	29.4	203	10.3	1.4	7.27	689	24.5	56	6.44	26.8	4.78	1.02	5	0.77	4.93	1.09	3.41	0.491	2.92	0.49	5.98	0.75	1.26	18.1	11.4
Rewa 304_3	75.9733	0.175646	13.4093	1.87433	0.0378407	0.10322	1.14184	3.95756	3.32697	0.179966	4.98308	22.8356	7.28453		6.28	1140	0.9	480	0.91	4.19	37.2	20.1	136	90.9	37.4	222	12.1	1.51	8.17	845	30.7	60.5	6.49	32.8	6.72	1.04	6.9	0.98	6.54	1.32	3.31	0.66	3.92	0.66	6.8	0.88	1.72	23.2	13.5
Rewa 304_4	74.8342	0.232258	13.5295	2.40882	0.0803871	0.124177	1.42339	4.22606	3.14115	0.172249	5.75303	23.8238	7.36722		6.67	1300	0.98	583	1.2	5.2	72.1	21.6	140	103.7	41.7	246	13.66	2.11	8.51	1000	35.3	68.9	7.63	36.7	7.64	1.24	6.61	1.23	7.3	1.54	4.3	0.74	4.56	0.697	6.8	0.98	1.71	26.4	15.12
Rewa 304_6	76.1485	0.166697	13.0726	1.69127	0.0246975	0.101274	1.15377	3.72286	3.91833	0.187338	6.41164	19.4339	7.64118		6.3	950	16	453	3.8	18.3	40.1	18.6	95	300	24.1	140	8.3	1.32	6.27	602	28.1	54.5	6.4	26.6	5.2	0.75	4.69	0.67	3.89	0.78	2.55	0.37	2.42	0.39	3.74	0.63	0.73	19.1	11.9
Rewa 304_7	75.8512	0.137775	13.2994	1.96892	0.0526367	0.106177	1.19463	4.01814	3.3711	0.176299	6.07652	22.5004	7.38924		5.77	1150	0.8	481	1.08	2.38	48.4	14.81	107.1	90.8	27.5	242	9.87	1.33	6.4	679	23.2	49.1	6.09	24.3	5.03	1.04	5.34	0.78	4.7	0.96	3.47	0.474	2.98	0.431	5.73	0.642	1.35	16.8	9.33
Rewa 304_8	75.3228	0.243247	13.6381	1.99016	0.0543745	0.153556	1.35249	4.10382	3.14145	0.169562	5.53598	23.9771	7.24528
Rewa 304_9	75.9981	0.161989	13.3057	1.87427	0.0225237	0.101632	1.18402	4.07857	3.27321	0.197887	5.93127	23.2182	7.35178
Rewa 304_10	74.8576	0.226865	13.7008	2.25489	0.0272186	0.142377	1.47307	4.18076	3.13647	0.170904	5.6446	23.8668	7.31724		7.4	1630	2.53	740	1.61	6.8	66	27.4	137	135	40.9	324	15	1.37	8.6	980	34.4	70	7.5	31.5	6.7	1.41	4.7	1.02	6.6	1.27	3.85	0.59	5	0.57	7.7	0.81	2.28	31	13.1
Rewa 304_11	75.2942	0.197105	13.5183	2.16259	0.0305775	0.129964	1.34995	4.2508	3.06657	0.171808	5.51071	24.5532	7.31737		5.4	1087	0.8	574	1.13	2.29	61.4	17.2	97.2	107.3	33.9	261	10.18	2.13	6.48	751	28.4	55.7	5.95	23.3	6.07	1.11	4.68	0.841	5.73	1.12	3.16	0.44	3.43	0.56	6.85	0.71	1.07	19.53	11.7
Rewa 304_12	75.1978	0.228343	13.8115	2.00543	0.0328751	0.181988	1.42882	3.85136	3.26181	0.168554	6.25537	23.054	7.11317
Rewa 304_13	75.439	0.241626	13.5008	2.23477	0.0627748	0.130506	1.38624	4.09184	2.91236	0.170224	5.90328	25.903	7.00421		5.49	1297	0.73	573	1.14	2.32	61.7	18.1	115	108.4	34.5	253	11.42	1.56	6.67	771	27.1	53.9	5.92	27.1	6.08	1.05	5.26	0.934	6.01	1.12	3.5	0.615	3.76	0.61	6.14	0.7	1.15	20.4	11
Rewa 304_14	75.7384	0.194671	13.4502	1.68462	0.0401164	0.0977543	1.14569	3.49443	4.15404	0.169626	5.57178	18.2325	7.64847
Rewa 304_15	75.8125	0.177361	13.2747	2.07158	0.0566329	0.0972214	1.05007	4.11978	3.34006	0.196675	5.90183	22.6979	7.45984		6.2	781	0.68	508	0.57	Below LOD	52.9	23.1	141.1	74.6	44.3	199	14	2.38	9.09	1063	39.4	78.7	8	30.9	8.3	0.99	6.22	1.1	7.24	1.57	4.14	0.543	5.03	0.76	5.47	0.84	1.68	28.1	17.23
Rewa 304_16	75.6691	0.177819	13.2307	1.92074	0.070461	0.0974726	1.11645	3.90295	3.81427	0.175274	6.14436	19.8384	7.71722		4.98	820	0.62	493	3.4	7.9	23.9	19.2	105	76	34.6	197	8.01	1.69	6.33	660	24.6	54	5.6	21.5	4.6	1.04	4.3	0.86	5.66	1.02	3	0.38	3.1	0.54	5.2	0.55	2.4	19.7	11.4
Rewa 304_17	75.8755	0.193589	13.3231	1.8638	0.0306286	0.0926123	1.12502	4.26176	3.23399	0.183568	5.66845	23.4619	7.49575		5.34	903	0.39	461	0.88	1.9	47.4	17.7	108	76	32.1	207	9.3	2.05	7.1	675	25.6	57.9	5.97	24.7	5.05	0.9	4.78	0.79	5.11	1.18	3.52	0.503	3.18	0.57	5.47	0.73	1.54	19.2	11.85
Rewa 304_18	76.4294	0.17453	13.1139	1.76893	0.0367905	0.110195	1.16548	3.97866	3.22211	0.180303	5.76112	23.7203	7.20077		5.29	898	0.46	504	0.88	1.85	53.7	17.76	106.3	85.6	35	203.2	9.43	1.8	7.05	727	29.5	58.4	6.19	22.09	5.26	1.06	5.04	0.831	5.7	1.176	3.2	0.485	3.45	0.49	5.7	0.7	1.09	19.4	12.95
Rewa 304_19	75.0866	0.21311	13.6705	2.18126	0.0460689	0.117403	1.37856	4.28324	3.02324	0.148458	5.2295	24.8364	7.30648
Rewa 304_20	76.0706	0.149235	13.3545	1.77967	0.0157092	0.0981954	1.1662	4.14226	3.22369	0.16924	5.99587	23.5974	7.36595
Rewa 304_21	75.4761	0.181374	13.6044	1.99705	0.0393301	0.147107	1.34174	4.04346	3.1695	0.169169	5.31649	23.8132	7.21296		5.38	1260	11.4	463	2.31	26.8	37.5	17.2	105	88.5	26.6	214	8.58	1.74	7.2	651	22.6	51.3	5.64	20.6	4.12	0.87	3.72	0.73	4.21	0.94	2.94	0.435	2.93	0.44	5.67	0.71	1.45	20.2	10.5
Rewa 304_22	76.252	0.161791	13.4141	1.7078	0.0817717	0.101438	1.19645	3.71336	3.37132	0.180693	6.56368	22.6179	7.08467
Rewa 304_23	76.0703	0.152354	13.3176	1.66096	0.038743	0.0951027	1.15947	4.22225	3.28322	0.191336	5.53876	23.1694	7.50546		5.21	892	Below LOD	504	0.86	2.34	56.9	20.1	107	80.3	33.3	203	9.3	0.91	7	665	27.3	55.9	5.88	21.1	4.66	1	4.37	0.82	5.4	1.27	3	0.4	3.15	0.58	5.3	0.684	1.41	23	11.3
Rewa 304_24	75.1958	0.206272	13.6108	2.13433	0.0414911	0.142318	1.40479	4.1569	3.10725	0.174273	5.60557	24.2001	7.26415		5.72	1360	1.04	622	1.22	7.2	54.8	21.3	126	116.9	34.6	271	12.7	1.95	7.39	802	31.3	61.5	6.81	29.3	6	1.08	5.56	0.85	5.85	1.17	3.17	0.517	3.95	0.5	6.44	0.81	1.66	22.8	12.12
Rewa 304_25	75.2889	0.218608	13.6814	1.94647	0.0264696	0.141138	1.30481	3.98846	3.40381	0.145294	5.40032	22.119	7.39226		5.17	1011	0.66	533	0.95	1.7	41.6	17.06	97.8	91.6	32.1	224.6	8.45	1.59	6.31	653	26	53.3	5.64	21.24	4.62	1.02	3.96	0.71	5.16	1.077	3.11	0.418	3.3	0.528	6.13	0.695	1.15	17.8	11.08
Average	75.6782	0.189695	13.4333	1.94741	0.0413224	0.11558	1.24468	4.0284	3.32147	0.174014	5.76764	22.9269	7.34987		5.80471	1089.12	2.5025	526.765	1.41412	6.13938	50.2882	19.29	116.382	105.694	34.0235	225.459	10.7176	1.68706	7.27882	771.706	28.8059	58.9882	6.42059	26.5253	5.72529	1.04882	5.11	0.883294	5.68353	1.16524	3.35412	0.507706	3.62294	0.552882	5.92706	0.740765	1.50588	21.6135	12.2871
Standard Deviation	0.467633	0.0311809	0.196238	0.204289	0.0195445	0.0257528	0.128126	0.194322	0.286138	0.0128541	0.370905	1.73356	0.175407		0.632546	224.967	4.47697	73.6813	0.907841	6.89661	12.8157	2.91481	16.0244	52.7553	5.33954	39.7727	2.15972	0.37089	0.885303	139.915	4.57254	7.60492	0.734723	4.78275	1.16405	0.147686	0.882985	0.155353	0.973864	0.198761	0.43665	0.102284	0.768706	0.0956235	0.874405	0.101913	0.436893	3.86241	1.84698
Mangapipi 510_1	74.5434	0.19509	13.756	2.504	0.0361464	0.115106	1.20697	3.72689	3.91641	0.207394	7.63434	19.0336	7.6433
Mangapipi 510_2	74.5092	0.201339	13.6847	2.25611	0.0871464	0.115362	1.20947	4.41038	3.52627	0.212311	5.69548	21.1298	7.93665
Mangapipi 510_3	75.0015	0.213249	13.9351	2.26095	0.0262324	0.113426	1.23077	4.04991	3.16885	0.224582	6.99275	23.6683	7.21876
Mangapipi 510_4	74.6928	0.194601	14.041	2.31053	0.0403676	0.105392	1.16604	4.23177	3.21742	0.202981	6.15925	23.2152	7.44918
Mangapipi 510_5	74.8039	0.170032	13.4852	2.16937	0.0488126	0.0729585	1.04943	4.29562	3.90461	0.193865	3.9797	19.1578	8.20023
Mangapipi 510_6	74.7247	0.194406	13.9165	2.14161	0.0580984	0.110551	1.21971	4.14822	3.48618	0.229277	6.06519	21.4345	7.6344
Mangapipi 510_7	74.9903	0.178428	13.8478	2.1084	0.0384401	0.111905	1.16434	4.16983	3.39051	0.214057	6.46471	22.1177	7.56034
Mangapipi 510_8	74.59	0.218906	13.7942	2.43898	0.0598278	0.0865083	1.16645	4.26691	3.3782	0.18083	6.63407	22.0798	7.64511
Mangapipi 510_9	74.6178	0.16456	13.7892	2.27002	0.0199494	0.0812397	1.14588	3.82159	4.08978	0.206402	6.66612	18.2449	7.91136
Mangapipi 510_10	74.8542	0.207303	13.8204	2.13281	0.0815237	0.107264	1.15998	4.31628	3.32021	0.216434	5.49189	22.545	7.63649		6.01	992	0.42	435	0.65	1.05	60.1	18	140	59.1	35.7	263	11.3	2.18	9.83	775	29.6	77.6	8.58	29	5.86	0.93	6.56	0.88	5.33	1.45	4.24	0.628	3.83	0.569	7.38	1.09	1.64	18.2	15.6
Mangapipi 510_11	75.5549	0.174478	13.3141	1.94202	0	0.0804104	0.917554	4.09248	3.92402	0.199948	3.65361	19.2545	8.0165		7.35	1510	5.5	642	1.64	8.4	86.3	20.6	143	93.7	35.8	319	12.9	1.82	10.22	786	28.5	64.1	7.72	28.1	6.5	1.43	6.28	0.96	5.95	1.15	4.26	0.637	4.44	0.61	8.04	1.01	1.64	19.6	11.71
Mangapipi 510_13	74.7816	0.223376	13.9087	2.23116	0.0661105	0.124232	1.17356	4.27231	3.21897	0.220578	5.79514	23.2315	7.49128		6.89	1268	1.02	658	0.67	4.27	67.7	20	129	85.7	38.7	329	12.49	2.12	8.52	787	30.4	71.7	8.4	31.3	6.13	1.41	6.77	1.07	6.67	1.49	4.78	0.7	4.2	0.664	8.72	0.91	1.58	20.1	13.4
Mangapipi 510_14	74.8053	0.181043	13.8216	2.267	0.0480578	0.112084	1.22959	4.16634	3.36894	0.219062	5.14355	22.2044	7.53528		6.59	1302	0.47	700	0.58	2.79	83	19.2	135.4	90.2	40.4	301	13.38	1.99	7.97	844	31.5	65.7	8.02	33	6.89	1.07	7.31	1.055	7	1.49	4.22	0.681	4.39	0.65	7.33	0.99	1.65	20.9	12.87
Mangapipi 510_16	74.7177	0.232445	13.6256	2.39961	0.0494976	0.0957418	1.24479	4.27051	3.3641	0.22173	5.30854	22.2103	7.63461		5.47	1087	0.25	593	0.89	0.95	70.5	17.4	112.4	85.3	38.6	295	11.6	1.96	7.7	818	29.9	63.3	6.76	28.2	6.38	0.94	5.59	1.03	6.13	1.37	3.76	0.55	4.68	0.65	7.86	0.81	1.48	20.7	13.69
Mangapipi 510_17	74.5986	0.189044	13.8814	2.25238	0.0942599	0.0974941	1.16332	4.17697	3.54654	0.214898	5.31971	21.0342	7.72351		6.89	1202	0.27	645	0.57	Below LOD	74.4	19.1	126.2	82.3	37.7	319	12.24	1.77	8.22	772	28.7	67.8	8.13	30.1	6.12	1.3	7.02	1.07	6.58	1.42	4.73	0.643	4.5	0.63	8.49	0.9	1.41	20.1	12.87
Mangapipi 510_18	74.9276	0.172182	13.5659	2.21798	0.0604928	0.0949078	1.08833	4.0973	3.77526	0.191474	4.47641	19.847	7.87256		7.15	1385	2.4	622	0.76	4.1	55.2	20.2	171	81.7	39.9	285	15	2.04	9.49	919	33.4	69.6	8.37	34.9	6.57	1.13	7.62	1.11	7.09	1.36	4.34	0.701	4.29	0.608	7.82	1.1	1.52	24.7	14.9
Mangapipi 510_19	74.7185	0.206895	13.8245	2.39457	0.0741421	0.111035	1.17768	4.17122	3.32148	0.218708	6.47428	22.4955	7.4927		6.87	1205	0.72	634	0.58	3.41	48.4	19	127.5	81.3	38.8	315	12.17	1.69	8.33	750	28.6	65.2	7.75	31	6.33	1.15	7.71	1.12	6.82	1.37	4.51	0.679	3.85	0.606	8.61	0.749	1.22	18.4	12.79
Mangapipi 510_20	74.7984	0.194128	13.6977	2.35356	0.0461069	0.115759	1.1512	4.34434	3.29876	0.249158	5.30754	22.6747	7.64309		6.52	1379	0.34	689	0.46	2.16	85.8	19.8	131.7	89.9	40	299	13.5	1.79	7.73	844	31.4	65	7.98	33.3	6.83	1.18	8.04	1.07	6.52	1.4	4.32	0.746	4.96	0.67	7.58	0.91	1.6	20.8	13.04
Mangapipi 510_21	74.8197	0.247801	13.674	2.30888	0.0820536	0.104458	1.16876	4.44085	3.15355	0.212612	5.31973	23.7255	7.5944		7.7	2820	12.8	790	3	15.7	67	24.2	148	97	44.6	315	16.4	2.6	9.5	840	30.3	61	7.8	37	7.1	1.14	8.4	1.22	6.32	1.43	4.3	0.61	4	0.67	6.8	0.97	1.88	19.7	11.1
Mangapipi 510_22	74.4531	0.225082	13.8589	2.25303	0.0387004	0.0766956	1.07757	4.42319	3.59374	0.22317	5.43469	20.7175	8.01693		5.83	1200	3.4	690	1.04	6.6	58.8	20.3	113	77	38.6	266	10.25	1.71	7.3	654	27.8	58.3	6.9	26.5	4.7	1.18	5.6	0.85	5.47	1.31	3.59	0.59	3.38	0.58	6.36	0.66	0.97	17	11.04
Mangapipi 510_23	74.2142	0.265407	13.9731	2.52752	0.0669985	0.173779	1.33009	3.98274	3.46617	0.225869	7.04382	21.411	7.44891
Mangapipi 510_24	74.4656	0.178152	13.6995	2.39667	0.028173	0.108493	1.15395	4.37758	3.59181	0.219355	4.28322	20.7321	7.96939
Mangapipi 510_25	75.0179	0.230248	13.9379	2.24388	0.0322764	0.0828634	1.16705	4.10947	3.17837	0.243091	6.50577	23.6026	7.28784
Average	74.7479	0.20253	13.7762	2.27744	0.0514528	0.104246	1.16359	4.18968	3.48696	0.215121	5.73259	21.5551	7.67665		6.66091	1395.45	2.50818	645.273	0.985455	4.943	68.8364	19.8	134.291	83.9273	38.9818	300.545	12.8391	1.97	8.61909	799	30.0091	66.3	7.85545	31.1273	6.31	1.16909	6.99091	1.03955	6.35273	1.38545	4.27727	0.651364	4.22909	0.627909	7.72636	0.918091	1.50818	20.0182	13.0009
Standard Deviation	0.26335	0.0263843	0.168382	0.133441	0.023394	0.0210404	0.079165	0.180089	0.271119	0.0154451	1.01932	1.60446	0.246401		0.670797	493.723	3.80022	86.9725	0.744263	4.43976	12.698	1.75898	16.5045	10.1259	2.41653	21.8786	1.72101	0.266421	0.980454	67.4804	1.64101	5.28375	0.578764	3.18939	0.648305	0.163	0.93481	0.107155	0.583028	0.0957459	0.35539	0.056569	0.442978	0.0357616	0.74161	0.136492	0.242892	1.97728	1.42131
Pakihikura 303_1	77.6782	0.15663	12.5378	1.38483	0.0436221	0.06387	1.15942	3.58106	3.39461	0.160848	5.80114	22.8828	6.97567		4.75	564	0.81	278	0.98	Below LOD	32.5	15.1	116.9	75.6	18.9	98.1	5.32	1.02	7.1	760	22.3	46.7	4.4	16.4	3.23	0.62	2.55	0.474	3.06	0.74	1.93	0.36	1.95	0.318	3	0.6	1.4	15.6	12.3
Pakihikura 303_2	78.005	0.0738715	12.6153	1.27374	0.0268336	0.0529924	1.25319	3.43968	3.2594	0.179766	6.68364	23.9323	6.69908		4.57	543	0.8	301	0.96	1.86	37.4	15.45	114.9	88.1	21.5	99.9	5.88	1.16	7.22	780	24.8	45.5	4.48	16.1	3.09	0.56	3.34	0.448	3.22	0.63	2.12	0.281	2.29	0.327	3.38	0.507	1.54	17.7	12.32
Pakihikura 303_3	77.6003	0.0750926	12.6541	1.40622	0.0189197	0.0728591	1.19711	3.5941	3.38128	0.166292	4.97997	22.95	6.97538		4.27	534	1.22	292	1.01	18.4	20.4	14.7	109.7	85.3	19.9	101.4	5.74	1.01	6.11	779	22.4	41	3.88	16.3	4.05	0.487	2.81	0.551	2.91	0.58	1.9	0.279	1.77	0.341	2.89	0.46	2.27	17.9	11.01
Pakihikura 303_4	77.8427	0.0886229	12.543	1.35596	0.0415947	0.0420143	1.22337	3.4581	3.40465	0.173559	5.84064	22.8636	6.86274		5.28	800	1.13	316	1.23	45	39.5	18.8	145	97.6	21.4	104	8.4	1.45	8.2	923	25.1	50.4	4.5	18.4	4.49	0.54	3.54	0.61	3.01	0.75	2.29	0.353	2.58	0.346	3.33	0.72	2.17	20.7	12.56
Pakihikura 303_5	77.7545	0.0901181	12.7611	1.17055	0.0680592	0.0769845	1.15274	3.45171	3.47417	0.166972	4.71897	22.3808	6.92588		4.82	597	1	273	1.05	Below LOD	29.4	15.1	131	86	19.4	92.8	5.9	1.04	7.01	787	21.4	40.2	4.46	16.8	2.91	0.55	2.99	0.49	3.07	0.66	1.76	0.277	2.15	0.274	3.31	0.61	1.32	17.5	10.7
Pakihikura 303_6	77.9909	0.0896558	12.5431	1.2693	0.0373986	0.0872851	1.25705	3.61681	3.10844	0.166197	5.57659	25.09	6.72525		5.19	622	0.66	274	1.18	1.89	36.8	14.3	125	84.7	19.6	106.3	6.37	0.85	7.9	825	21.8	50.9	4.87	17.8	3.66	0.66	3.33	0.7	2.98	0.75	2.47	0.367	2.33	0.363	3.59	0.58	0.92	15.6	11.3
Pakihikura 303_7	77.7706	0.0859498	12.7244	1.27657	0.037458	0.0778072	1.22407	3.60906	3.19404	0.184829	5.72639	24.3487	6.8031		5.17	679	0.76	297	0.88	3.14	41.2	15.03	137.8	90.6	20.5	100	6.84	1.38	7.24	875	24.2	46.2	4.89	19.4	3.4	0.6	3.36	0.55	3.22	0.78	2.27	0.283	2.44	0.308	3.8	0.671	1.98	17.8	12.15
Pakihikura 303_8	77.8835	0.103611	12.6576	1.42989	0.0550068	0.0617834	1.16961	3.61837	3.02054	0.170375	6.62173	25.7846	6.63891		5.25	646	0.83	288	0.88	3.65	34.2	15.3	131.1	89.3	20.8	97.8	6.43	1.2	7.39	860	23.5	44.5	4.87	18.4	3.46	0.72	3.66	0.58	3.72	0.693	2.15	0.387	2.23	0.335	3.31	0.687	1.54	17.1	11.8
Pakihikura 303_9	77.7669	0.0983877	12.5954	1.38141	0.0108538	0.0661795	1.2323	3.3769	3.4717	0.157798	5.35226	22.4002	6.8486		5.51	624	Below LOD	354	0.97	5.7	42.6	21.9	141	94.2	21.1	104.6	6.52	1.84	8.35	837	25.3	49.5	4.72	14.3	3.1	0.61	2.94	0.416	3.3	0.62	2.01	0.331	1.99	0.37	3.93	0.52	1.71	23.9	12.4
Pakihikura 303_10	77.9066	0.0879355	12.6413	1.29209	0.0355362	0.0527717	1.22216	3.20439	3.55721	0.207891	7.85523	21.9011	6.76159		4.84	660	0.92	305	1.09	2.68	37.9	14.6	134	91	21.4	102	6.8	1.68	7.45	920	24.7	48.3	4.59	19.5	3.7	0.66	3.3	0.6	3.78	0.637	2.22	0.39	2.52	0.352	3.56	0.57	1.63	18.2	12.6
Pakihikura 303_11	77.3953	0.103004	12.6559	1.40397	0.0384819	0.0623968	1.20908	3.73429	3.39755	0.179804	4.89784	22.7798	7.13184		4.38	543	0.88	282	0.9	2.33	34.1	14.7	113	86	17.8	95	5.96	1.22	6.24	773	20.6	43.5	3.8	15.5	2.56	0.57	3.05	0.464	3.12	0.58	1.7	0.21	1.9	0.266	3.07	0.58	1.36	15	10.7
Pakihikura 303_12	77.9654	0.0896168	12.5739	1.3023	0.0265074	0.0741601	1.21178	3.5633	3.19295	0.17529	5.53547	24.418	6.75625		5.16	572	1.17	303	0.87	29	18.8	16.3	129	74.8	19.2	104	5.77	1.11	8.01	741	20.7	48.6	4.59	15.2	3.6	0.68	3.47	0.37	2.5	0.58	1.76	0.3	2.02	0.16	2.78	0.395	1.18	14.3	11.2
Pakihikura 303_13	77.6486	0.102027	12.632	1.29104	0.0216663	0.0947348	1.19845	3.53143	3.48007	0.159781	5.17197	22.3124	7.01151		5.78	658	1.03	294	1.06	2.9	36.7	14.9	137	88.5	20.8	116.4	6.61	1.66	8.57	887	24.1	53.6	5.33	18.02	3.19	0.69	3.58	0.519	3.18	0.811	2.25	0.325	2.02	0.343	3.74	0.649	1.5	16.7	12.12
Pakihikura 303_14	77.6362	0.0384247	12.7141	1.2966	0.0469192	0.0541179	1.16432	3.51778	3.53157	0.161615	5.5786	21.9835	7.04934		5.91	622	0.88	310	1.01	10.8	36.1	18.2	158	86	20.1	96.4	6.55	1.31	8.7	880	23.6	46.2	4.89	18.7	3.8	0.77	3.61	0.494	3.25	0.69	1.92	0.267	2	0.358	2.89	0.63	1.78	19.9	11.4
Pakihikura 303_15	77.7316	0.0923315	12.6964	1.3927	0.0306367	0.0646709	1.25096	3.53265	3.20797	0.159517	5.69327	24.2308	6.74062		5.4	664	1.05	317	1.14	6.8	35.2	15.4	136	85.7	20.4	99.9	6.43	1.15	7.2	863	24	45.4	4.89	19.3	3.57	0.63	3.61	0.51	3.26	0.68	1.93	0.372	2.1	0.289	3.33	0.68	1.6	17.7	11.78
Pakihikura 303_16	77.6324	0.117293	12.6237	1.37103	0.00879915	0.0938359	1.20132	3.53031	3.42125	0.166576	5.14188	22.6912	6.95157		4.69	581	0.75	293	1.13	3.8	30.7	15.9	121	79.4	20.2	101.4	5.58	1.35	7.04	736	22.6	46.9	4.5	15.5	2.76	0.649	2.4	0.428	2.96	0.66	1.81	0.271	2.1	0.394	3.49	0.413	1.42	17	11.8
Pakihikura 303_17	77.6742	0.093578	12.7151	1.28718	0.0149722	0.0751292	1.22645	3.72389	3.18954	0.181251	5.65705	24.3528	6.91344		5.07	588	1.67	324	1.37	20.3	35.1	18.2	127	95.6	20.9	107	6.47	1.54	7.64	920	24.9	47.7	4.36	16.6	3.88	0.66	2.52	0.475	3.09	0.75	2.35	0.39	2	0.41	3.93	0.5	1.27	20.5	13
Pakihikura 303_18	77.5166	0.0992217	12.6442	1.44089	0.023637	0.0780215	1.23006	3.58261	3.3848	0.163926	4.92903	22.9014	6.96741		4.79	620	0.77	295	1.14	4.04	39	15	122.5	90.6	21.4	99.8	7.04	1.34	6.55	900	23.3	48.7	4.7	19	2.92	0.51	2.91	0.55	3.57	0.71	1.65	0.36	2.18	0.34	3.4	0.54	1.47	16.4	11.7
Pakihikura 303_19	77.6852	0.10924	12.7488	1.26733	0	0.064812	1.23398	3.56257	3.3281	0.155264	5.89861	23.3422	6.89066		4.73	572	1.08	288	0.8	30	17.5	15.1	108	88.6	22.43	107.3	6.36	1.16	5.91	831	22.8	41.8	4.16	16.9	3.38	0.64	2.91	0.55	3.07	0.63	1.48	0.356	2.38	0.45	3.15	0.45	1.82	13.8	10.8
Pakihikura 303_20	77.6664	0.0955575	12.4706	1.29082	0.0201536	0.0838551	1.22674	3.27657	3.86935	0.202657	7.61146	20.0722	7.14592		4.74	538	0.69	244	1.11	2.87	30.3	13.9	113	73	17.6	99	5.6	1.32	6.37	717	19.4	44.7	4.25	15.3	2.7	0.69	2.8	0.413	2.42	0.74	1.71	0.279	2.06	0.324	2.94	0.592	1.39	13.9	11.41
Pakihikura 303_21	78.058	0.0870224	12.5573	1.16344	0.0339707	0.0575607	1.21349	3.48404	3.34512	0.17064	5.49869	23.3349	6.82916		5.26	557	0.71	288	0.77	3.03	32.9	15.9	123	79.7	20.2	109	6.17	1.31	7.71	787	22.5	52	4.64	16.7	3.23	0.66	3.11	0.458	3.23	0.725	2.43	0.33	2.37	0.39	3.71	0.58	1.48	15.8	12.7
Pakihikura 303_22	77.7178	0.0973676	12.6343	1.39505	0.0328951	0.0663551	1.18936	3.48628	3.38059	0.14711	4.36074	22.9894	6.86687
Pakihikura 303_23	77.7536	0.102073	12.759	1.33338	0.0144051	0.0854114	1.21527	3.60106	3.13579	0.167659	6.40005	24.7956	6.73685
Pakihikura 303_24	77.4135	0.112048	12.8151	1.31502	0.0202794	0.08764	1.21712	3.72947	3.28978	0.178893	5.01849	23.5315	7.01925
Pakihikura 303_25	78.0299	0.101783	12.4598	1.3623	0.0259923	0.061462	1.23706	3.55696	3.16468	0.171794	6.13336	24.6565	6.72164
Average	77.749	0.0956185	12.6389	1.32614	0.0293839	0.0703484	1.21266	3.53454	3.34341	0.171052	5.70732	23.317	6.87794		5.02667	608.762	0.9405	296	1.02524	10.4311	33.2524	15.8943	127.329	86.2048	20.2633	102.005	6.32095	1.29048	7.32905	827.667	23.0476	46.7762	4.56048	17.1486	3.36571	0.626476	3.13286	0.507143	3.13905	0.685524	2.00524	0.322286	2.16095	0.336095	3.35857	0.568286	1.55952	17.2857	11.7976
Standard Deviation	0.179215	0.0198621	0.0908497	0.0723537	0.0152146	0.0137499	0.0283684	0.124992	0.178126	0.0136716	0.832916	1.23069	0.13736		0.427146	63.1165	0.239637	22.1359	0.148816	12.3471	6.91293	1.89181	12.7262	6.62129	1.21158	5.32883	0.663339	0.245122	0.798655	65.554	1.62869	3.51723	0.357106	1.56855	0.478044	0.0708693	0.387661	0.0780707	0.32252	0.0681408	0.280813	0.0503658	0.215451	0.0595104	0.349375	0.0909935	0.3183	2.46298	0.690991
Birdgrove 511_1	74.9935	0.199102	13.2938	2.30053	0.0354574	0.103912	1.0854	4.03938	3.94887	0.205241	4.02886	18.9912	7.98825		5.38	873	0.86	393	1.26	1.2	55	19	179	77.8	37.6	242	13.2	3.1	13.48	903	37.8	75.7	8.4	29	6.8	1.013	6.31	0.94	6.06	1.4	3.47	0.548	4.18	0.561	7.74	1.085	2.55	28.8	22.2
Birdgrove 511_2	74.9908	0.218119	13.7802	1.83795	0.0326963	0.150395	1.30299	3.51234	4.17449	0.187157	5.74279	17.9641	7.68682		5.47	1066	1.58	416	1.55	0.76	58	19.6	152.6	94.2	39.4	248	11.52	2.3	10.2	933	33.9	70.1	7.33	29	6.96	1.06	5.93	1.004	6.71	1.35	3.7	0.585	4.38	0.674	6.74	0.97	1.76	26.1	17.6
Birdgrove 511_3	75.1	0.184194	13.5171	1.86471	0.0306005	0.0913696	1.08887	4.18504	3.93811	0.167077	3.48341	19.0701	8.12315		5.63	991	Below LOD	515	0.71	0.69	60.1	16.92	142.7	70.8	34.8	265	10.7	2.11	8.53	740	30.2	65.3	7.32	25.7	5.9	0.98	6.21	0.79	5.82	1.27	3.28	0.5	3.22	0.6	6.49	0.877	1.46	20.34	14.33
Birdgrove 511_4	75.2935	0.168019	13.3854	2.09191	0.045932	0.10425	1.10457	3.8488	3.95761	0.203098	3.54927	19.025	7.80641		5.55	967	0.96	372	1.01	2.2	50.3	19.5	199	77.1	37.5	236	14	3.57	13.5	961	36.6	72.3	8.51	32.6	7.16	1.02	7.2	1.02	6.61	1.25	3.26	0.569	4.23	0.63	6.97	1.2	2.94	32.2	20.8
Birdgrove 511_6	74.7409	0.161655	13.4694	1.95008	0.0625374	0.0674663	1.01958	3.78724	4.7411	0.254566	3.49278	15.7645	8.52834		5.58	1008	1.81	486	1.85	3.6	50.9	18.8	127.8	97.1	35.5	262	10.15	2.16	9.08	764	35.2	64.5	7.66	26.6	5.83	1.04	6.22	0.828	6.43	1.24	3.46	0.479	3.51	0.514	6.9	0.92	1.48	22.4	17.2
Birdgrove 511_7	74.8725	0.194622	13.6778	2.13993	0.045922	0.104893	1.27013	4.17403	3.52014	0.195795	4.92645	21.2698	7.69417		5.9	1225	3.05	380	1.73	3.08	29.1	18.9	170	97	35.3	219	10.42	2.18	10.9	920	32.1	59.9	7.45	27	5.34	0.73	7.2	0.95	5.48	1.1	3.46	0.61	3.96	0.551	6.23	0.9	2.19	23.8	16.2
Birdgrove 511_8	75.4479	0.219357	13.6	1.60958	0.0279223	0.120641	1.11584	3.79589	4.06285	0.177935	5.72317	18.5702	7.85874		4.81	1086	2.91	399	1.96	2.55	37.5	18.8	128.7	84	32.4	219	8.49	2.88	8.87	707	28.8	58.3	6.16	22.7	4.38	0.89	5.03	0.71	5.41	1.01	3.21	0.474	3.02	0.476	5.81	0.72	1.54	22.4	14.3
Birdgrove 511_9	75.4359	0.242494	13.7319	1.69501	0.0245219	0.132905	1.21334	3.72915	3.79473	0.182562	5.74136	19.8791	7.52389		5.48	748	0.47	429	0.72	1.59	55.3	19.2	129.5	67.1	38.4	207	11.2	2.34	9.53	863	34.3	67.8	7.18	25.6	6.52	0.86	6	0.94	5.86	1.22	3.65	0.55	3.99	0.67	6.7	0.9	1.6	25.6	17.2
Birdgrove 511_10	76.0034	0.134824	13.1888	1.72654	0.0474955	0.0523808	0.952194	3.83173	4.06261	0.174778	4.02064	18.708	7.89434
Birdgrove 511_11	77.4364	0.039637	12.8934	0.984383	0.0549839	0.0435681	0.949893	3.23411	4.36369	0.136163	5.41515	17.7456	7.59779		5.06	1124	3.14	357	1.75	2.24	40.4	17.4	133.9	84.1	32.5	230	8.3	2.02	9.25	729	28.5	60.8	6.46	23.7	4.43	0.94	5.24	0.678	4.78	1.16	3.11	0.468	2.74	0.522	6.14	0.76	1.38	18.8	15.2
Birdgrove 511_12	75.0644	0.186807	13.4376	2.12649	0.0623199	0.0662342	1.10009	4.09911	3.85694	0.220262	4.18619	19.4621	7.95606		6.29	925	Below LOD	417	0.46	Below LOD	65.1	18.6	193	68	40.9	200	13.11	2.43	11.9	957	36.9	73.7	8.82	34.7	7	0.8	7.75	1.068	6.58	1.44	4.21	0.71	4.77	0.64	5.97	1.06	1.94	26.6	18.1
Birdgrove 511_13	75.1885	0.222545	13.8749	1.93543	0.0587329	0.151662	1.23952	3.8993	3.42935	0.195701	5.98671	21.925	7.32865		5.92	740	14.3	451	1.94	7.9	34.8	19.2	224	49.3	22.1	84	8.4	1.88	18.6	610	21.2	43.9	5.1	17.2	4	0.38	3.5	0.445	3.5	0.86	2.64	0.338	2.28	0.35	3.34	1.18	3.09	33.9	18.7
Birdgrove 511_14	74.9865	0.168263	13.4989	2.02398	0.0513317	0.0684593	1.05375	4.21283	3.93597	0.191032	3.68866	19.0516	8.1488
Birdgrove 511_15	74.9189	0.204811	13.8547	1.83576	0.0265039	0.155279	1.26833	3.75226	3.9834	0.180994	5.5227	18.8078	7.73566		4.84	823	0.51	407	1.26	2.38	43.1	17	124	73	34.2	213	9.2	1.86	9.2	693	29.7	59.8	6.33	23	5.13	0.85	5.2	0.68	5.19	1.17	3.1	0.48	3.41	0.62	5.88	0.74	1.47	19.4	15.6
Birdgrove 511_16	77.6273	0.0347621	12.9636	0.887876	0.0300751	0.0754572	0.921385	3.17241	4.28712	0.155543	6.06714	18.1071	7.45953		5.16	1210	2.93	344	1.69	2.29	46.3	16.7	153	88.6	32.8	195	10.43	2.24	9.57	901	30.2	58.6	6.39	28.1	5.75	0.85	5.44	0.861	5.83	1.07	2.76	0.535	4.13	0.536	5.98	0.87	1.81	23.3	16.7
Birdgrove 511_17	77.6907	0.0232483	12.6928	0.830396	0.026742	0.0369681	0.72074	2.83318	5.14527	0.135231	6.36418	15.0994	7.97845		6.39	1078	Below LOD	492	0.83	0.69	62.4	17.3	139.2	74.9	35.3	291	12.04	2.43	9.44	792	29.4	69.6	7.8	29.3	5.93	1.13	7.2	0.9	5.98	1.43	3.38	0.61	4.23	0.68	7.69	0.95	1.73	21	15.5
Birdgrove 511_18	74.9357	0.165926	13.458	2.28743	0.0349669	0.0802759	1.08989	4.18571	3.76207	0.215362	4.51879	19.9187	7.94778		3.64	684	Below LOD	344	0.488	0.37	40	12.03	84.3	55	24.1	174	8.48	1.56	5.51	580	21	42.3	4.46	19	4.04	0.608	3.86	0.68	4.36	0.849	2.14	0.377	3.04	0.418	4.58	0.55	1.27	15.2	9.64
Birdgrove 511_19	77.1477	0.0204413	12.8032	0.855934	0.0434091	0.0478864	0.747766	3.17872	5.15489	0.125764	5.33909	14.9659	8.33361		5.52	939	0.99	497	0.67	2.5	32	17.1	117	61.9	32	248	9.9	1.8	7.88	632	24.6	57.7	6.5	22.6	4.1	0.82	4.7	0.73	5	1.14	2.76	0.45	3.22	0.46	6.1	0.612	1.48	19.4	12.2
Birdgrove 511_20	75.0231	0.181509	13.4686	2.13987	0.0481814	0.0958212	1.12712	4.04839	3.86732	0.202468	5.38695	19.3993	7.91571		4.51	182	0.41	361	0.214	1.32	22.4	12.2	193	25.4	21.4	64.3	5.86	1.49	15.5	382	17.2	40.3	3.99	13.1	3.17	0.288	2.88	0.64	2.91	0.73	1.75	0.363	2.73	0.38	2.45	0.98	2.43	19.7	17.4
Birdgrove 511_21	77.5641	0.0342576	12.7036	0.972674	0.0404163	0.0423691	0.661553	3.13495	4.84609	0.107868	4.68388	16.0055	7.98103
Birdgrove 511_22	75.052	0.204499	13.4484	2.15152	0.0743892	0.0997914	1.11633	3.97245	3.88061	0.212377	4.19573	19.3403	7.85306		5.05	884	1.04	382	0.92	4.56	54.9	18.6	171	76.6	36.5	232	13.15	3.25	13.24	952	36.4	73	7.64	29.5	6.28	0.97	5.45	0.97	6.12	1.17	2.8	0.503	3.75	0.64	6.29	0.92	2.3	27.4	19.9
Birdgrove 511_23	76.1894	0.243346	13.3341	1.37617	0.0191396	0.199181	1.59056	3.88541	3.1626	0.193573	6.07158	24.0907	7.04802		2.75	723	4.1	187.1	1.17	5.22	20.5	9.78	75	56.8	15.66	112.1	3.98	1.38	5.87	493	14.59	29.6	3	10.73	2.03	0.451	2.05	0.332	2.25	0.518	1.21	0.206	1.35	0.265	3.13	0.322	1.12	11.45	7.94
Birdgrove 511_24	74.8901	0.149526	13.579	1.8485	0.0271396	0.0897074	1.02457	3.73948	4.65195	0.248179	5.36996	16.0987	8.39142
Birdgrove 511_25	75.6361	0.207094	13.3588	1.90531	0.0512631	0.0987062	1.08243	3.94092	3.71936	0.205794	4.81242	20.3358	7.66027
Average	75.6762	0.158711	13.3756	1.72408	0.0417783	0.0949824	1.07695	3.75803	4.09363	0.186438	4.92991	18.7331	7.85166		5.20684	909.263	2.604	401.532	1.16747	2.50778	45.1632	17.1911	149.3	72.5632	32.5453	207.442	10.1332	2.26211	10.5289	763.789	29.3995	60.1684	6.65789	24.6911	5.30263	0.825263	5.44053	0.798211	5.30947	1.12511	3.01842	0.492368	3.48105	0.536158	5.84895	0.869263	1.87053	23.0416	16.1426
Standard Deviation	1.01625	0.0723217	0.343432	0.477902	0.0144143	0.0411307	0.199067	0.385314	0.505524	0.0356322	0.919704	2.13567	0.33429		0.868818	238.026	3.44287	74.1664	0.553335	1.88794	13.3642	2.8031	38.5615	17.8705	6.82592	60.6115	2.56422	0.592645	3.21567	169.546	6.84915	12.8081	1.57145	6.22102	1.42644	0.237563	1.53224	0.196401	1.26382	0.243886	0.713437	0.114706	0.840244	0.119387	1.46493	0.216466	0.563397	5.51244	3.51596
Mangahou 302_2	75.6191	0.205157	13.6818	1.80922	0.00137003	0.188175	1.54449	3.51956	3.43112	0.203224	6.27172	22.0392	6.95068		4.68	1168	6.36	299	2.35	3.47	29.2	15.13	127.4	102.1	19.65	214	7.05	1.9	9.29	673	21.83	47.6	4.68	17.9	3.05	0.707	3.63	0.514	3.19	0.743	2.42	0.31	2.41	0.403	5.69	0.678	1.33	16.09	14.46
Mangahou 302_3	74.6827	0.191962	13.7713	2.14869	0.0434825	0.112505	1.08048	4.23104	3.73779	0.231338	5.49883	19.9805	7.96883		5.31	1490	17.6	279	3.12	60	27.5	16.4	136	104.4	18.8	210	7.53	2.06	9.44	674	20.2	45.7	4.81	17	2.8	0.64	3	0.535	2.87	0.665	1.8	0.256	2.06	0.319	5.03	0.71	1.15	18.2	13.2
Mangahou 302_4	74.8122	0.259138	13.8252	1.95029	0.0109513	0.199444	1.67943	3.53993	3.72338	0.219211	6.19517	20.0925	7.26332		3.96	1019	5	235	1.66	3.2	28.3	11.67	117.4	86.3	15.02	147.8	6.46	1.11	7	595	18.6	34	4.37	14.9	2.86	0.54	2.59	0.464	2.54	0.56	1.71	0.278	1.88	0.287	3.89	0.68	1.2	14.26	10.57
Mangahou 302_5	75.0408	0.25593	13.7966	2.00028	0.0266284	0.211225	1.61833	3.70998	3.34013	0.199108	5.96447	22.4664	7.05011		5.75	942	Below LOD	599	0.463	1.7	74.1	19.94	128.6	83.5	41.1	274	12.5	2.59	8.98	827	33.1	65.7	7.32	28.4	6.95	1.04	6.19	1.06	6.73	1.53	4.31	0.544	4.62	0.67	7.33	0.939	1.69	24.9	15.47
Mangahou 302_6	74.783	0.234943	13.8827	1.9105	0.0493441	0.19794	1.75637	3.46786	3.71733	0.21256	6.31522	20.1174	7.18519		4.92	1330	8.47	344	2.76	54	69.8	16	160	114.4	21.5	196	8.97	10	10.2	840	25.6	45.4	5.15	21	3.67	0.69	4.53	0.654	3.65	0.667	2.25	0.315	2.93	0.39	5.11	0.77	1.72	23.3	14.48
Mangahou 302_8	75.4571	0.191615	13.6105	1.69155	0.0238958	0.161258	1.53497	3.65277	3.6763	0.210604	5.95894	20.5253	7.32906		5.43	1218	6.17	385	2.27	Below LOD	40.2	19.2	156	135.4	25.9	230	9.6	2.1	11.2	977	30.9	55.1	5.48	21.2	4.77	0.96	4.18	0.68	4.59	0.91	2.41	0.35	2.66	0.452	5.92	0.77	1.98	23.9	18.3
Mangahou 302_9	75.4328	0.231595	13.6664	1.69125	0.0556382	0.17811	1.55423	3.48156	3.70842	0.214201	6.52745	20.341	7.18998		5.01	1103	5.42	329	2.45	4.21	37.3	17.55	138.9	112.8	23	207	7.46	2.12	9.7	764	26.9	50.8	5.19	18.25	3.62	0.739	3.39	0.456	3.74	0.796	2.23	0.337	2.24	0.42	5.81	0.79	1.36	21	16.25
Mangahou 302_10	75.5237	0.21338	13.7096	1.6496	0.038682	0.210144	1.59289	3.44834	3.61364	0.20609	7.04974	20.8996	7.06198		5.09	1331	23.9	357	2.97	44.3	29.9	18.8	127	128	23.4	211	8.8	2.36	8.9	790	24.2	44.7	4.83	17.8	4.2	0.71	3.4	0.55	3.67	0.66	2.14	0.32	2.88	0.303	4.7	0.84	1.17	20.9	13.8
Mangahou 302_11	74.9523	0.246429	13.9451	1.79535	0.0239739	0.22597	1.69717	3.67632	3.43737	0.2009	6.26495	21.8052	7.11369		5.03	1241	7.6	386	2.59	6.7	24.2	18.5	133.6	134	23.1	226	8.9	2.07	9.29	790	27.9	49.3	5.13	16.5	3.47	0.69	3.03	0.558	3.58	0.75	2.24	0.344	2.47	0.394	6.06	0.84	1.3	22.2	15.3
Mangahou 302_12	74.6755	0.0868202	13.9279	2.03225	0.0554449	0.132912	1.23922	3.32159	4.52842	0.148634	3.88561	16.4904	7.85001		5.95	383	Below LOD	663	0.41	1.91	60	17.4	206	93.6	22.4	85.6	10.1	1.57	15.4	884	28.2	59.2	7.26	24.4	4.59	0.57	3.85	0.763	3.66	0.88	2.94	0.336	2.87	0.372	2.81	1.24	1.91	23.2	15.6
Mangahou 302_13	74.9868	0.241715	13.6022	1.89126	0.0573374	0.206785	1.64198	3.41725	3.95465	0.223214	5.93815	18.9617	7.3719		5.82	1550	7.7	344	2.35	Below LOD	43.1	17.2	180	122.6	23.1	202.8	9.48	2.21	10.61	874	26.6	48.4	6.07	23.4	4.1	0.644	3.92	0.481	3.7	0.667	2.38	0.44	2.64	0.389	5.57	0.95	1.79	21.1	15.2
Mangahou 302_14	75.266	0.246291	13.6978	1.87039	0.0212221	0.202996	1.74676	3.48925	3.45923	0.211174	6.21256	21.758	6.94847		4.52	1077	7.9	313	2.23	12.2	24.3	16.2	123	121.7	21	187	7.19	2.02	8.29	758	24.1	42.4	4.27	16.1	3.35	0.68	3.26	0.492	3.68	0.71	2.37	0.289	2.64	0.405	4.8	0.62	1.14	18.3	13.8
Mangahou 302_15	75.3598	0.234064	13.4952	1.75747	0.0354049	0.200504	1.72008	3.16013	4.03735	0.227016	7.51338	18.6656	7.19748		5.41	1430	6.17	337	2.4	7.6	28	15.9	161	111.9	20.9	186	8.58	1.98	9.5	783	24	42.7	5.02	19.9	3.3	0.54	3.5	0.48	3.71	0.63	2.01	0.45	2.46	0.45	4.9	0.74	1.25	17.1	12.9
Mangahou 302_16	76.9317	0.0546848	13.3981	1.30407	0.0668413	0.0745343	0.975124	3.23105	3.96389	0.133155	4.904	19.4081	7.19494		5.47	1358	8.35	331	2.8	9.6	30.9	17.7	156	112.2	19.8	229	8.15	2.05	11.1	734	23.5	49.8	5.52	18	3.54	0.77	3.9	0.437	3.35	0.82	2.34	0.335	2.19	0.41	5.85	0.72	1.32	19.5	14.8
Mangahou 302_17	75.3336	0.228209	13.6063	1.77564	0.0340326	0.168628	1.55212	3.52891	3.77254	0.207666	5.67053	19.9689	7.30145		5.57	1261	6.31	311	2.42	11.4	41.9	15.69	158.8	109.1	20.5	225	8.61	2.83	11.05	788	24.2	51.9	5.41	18.8	3.68	0.88	3.55	0.528	3.45	0.731	2.42	0.358	2.44	0.405	6.17	0.81	1.62	19.8	15.4
Mangahou 302_18	75.4972	0.191503	13.632	1.6596	0.0116782	0.160489	1.55987	3.45853	3.82915	0.214219	6.5355	19.7164	7.28768		4.84	1290	7.8	376	2.29	8.1	27.9	16.64	133.5	126	21.5	210	7.04	2.06	9.38	737	25.8	48.8	4.96	16.5	3.48	0.61	3.14	0.453	3.88	0.65	2.16	0.29	2.05	0.327	5.27	0.719	1.29	18.63	14.6
Mangahou 302_19	75.4122	0.244071	13.5986	1.72507	0	0.183053	1.581	3.49827	3.75771	0.208018	6.35052	20.0687	7.25598		4.91	1273	6.81	356	2.75	7	30.6	16.9	143	106.7	20.6	219	7.5	2.15	9.5	698	22.8	49	5.09	16.7	2.97	0.78	3.31	0.465	3.31	0.719	2.27	0.297	2.2	0.341	6.05	0.748	1.43	16.9	14.8
Mangahou 302_20	74.9087	0.233785	13.8715	1.91688	0.051715	0.197382	1.66422	3.493	3.6628	0.196428	6.88559	20.4512	7.1558		5.38	1478	8.07	361	2.81	Below LOD	30.7	18.5	169	129.3	24.2	216	10.6	2.46	10.89	921	29.2	50.7	5.26	21.9	4.84	0.66	4.01	0.665	3.87	0.79	2.51	0.363	3.28	0.378	5.02	0.91	1.99	22.2	16.4
Mangahou 302_21	75.4958	0.241367	13.5546	1.72391	0.0172233	0.183061	1.57211	3.36518	3.84672	0.19858	6.80443	19.626	7.2119		6.29	1495	7.57	345	2.61	4.49	49.8	17.28	173.8	129.3	22.66	251	9.52	2.08	12.31	894	27.1	54.9	6.34	22.2	3.96	0.91	4.39	0.662	3.93	0.82	2.88	0.426	2.89	0.367	6.49	0.935	1.75	20.9	15.88
Mangahou 302_22	75.0802	0.219941	13.9309	1.81409	0.0858576	0.23453	1.70296	3.31327	3.61824	0.202614	6.52339	20.7505	6.93151
Mangahou 302_23	75.0354	0.261977	13.7896	1.8106	0.00685141	0.16974	1.71739	3.08974	4.11874	0.196332	6.28865	18.218	7.20849
Mangahou 302_24	75.2123	0.2266	13.6368	1.74686	0.00135934	0.190196	1.63278	3.45939	3.89374	0.203929	5.53433	19.3162	7.35313
Mangahou 302_25	74.9281	0.214919	13.8292	1.72881	0.0529752	0.204006	1.65773	3.58562	3.79864	0.203779	5.46475	19.7249	7.38426
Average	75.236	0.215482	13.7156	1.80016	0.0335613	0.18233	1.56616	3.48428	3.7664	0.20313	6.11121	20.0605	7.25069		5.22842	1233.53	8.65882	365.789	2.30016	14.9925	38.3	16.9789	148.895	113.858	22.5332	206.695	8.63368	2.51158	10.1068	789.526	25.5121	49.2684	5.37684	19.5184	3.85263	0.724211	3.72474	0.573526	3.74211	0.773579	2.41	0.349368	2.62158	0.393789	5.39316	0.811	1.49421	20.1253	14.8005
Standard Deviation	0.468933	0.0502851	0.147445	0.166701	0.0233682	0.0363981	0.201118	0.222879	0.256704	0.0218851	0.752349	1.31371	0.246082		0.548384	265.937	4.79414	100.957	0.731808	19.2129	15.0343	1.81441	22.985	15.3352	5.06446	39.1943	1.483	1.8485	1.75921	95.4622	3.5554	6.75689	0.838372	3.4265	0.963851	0.138778	0.77727	0.15077	0.840196	0.203637	0.547388	0.0708043	0.603391	0.0809983	0.988478	0.140968	0.295039	2.86855	1.6031
Ototoka 521_1	74.1785	0.258385	13.9415	2.48228	0.0594685	0.092735	1.23471	4.30047	3.45194	0.268427	6.11283	21.4889	7.75242		6.04	1440	Below LOD	645	0.847	2.12	42.3	18.7	136.2	117.6	39.7	313.1	12.49	2.05	8.91	816	30.9	58.1	7.91	31.8	6.69	1.12	7.2	1.18	7.25	1.34	4.1	0.699	4.5	0.594	8.47	1.008	1.55	20.1	14.8
Ototoka 521_3	74.1812	0.230731	13.8245	2.64515	0.0713735	0.114478	1.23965	4.2162	3.47668	0.255114	5.42704	21.3368	7.69288		5.57	1199	Below LOD	686	0.8	2.15	72	18.9	122.7	113.7	36.3	307	11.56	2.28	8.83	783	29.6	58.6	6.57	26.6	5.86	1.14	5.47	0.911	6.79	1.31	3.49	0.5	4.2	0.609	7.56	0.86	1.5	21.5	14.11
Ototoka 521_4	74.0043	0.257178	13.8242	2.74654	0.0856939	0.117985	1.24287	4.33844	3.38272	0.26464	5.67197	21.8772	7.72116		6.51	923	0.58	413	0.457	2.82	54.7	19.6	186	66	36.4	211	12.47	2.62	12.71	871	31.8	72.3	8.63	33.3	6.18	1.02	6.56	0.96	6.17	1.23	3.97	0.643	4.08	0.645	6.27	1.04	2.37	23.6	16.8
Ototoka 521_5	75.3547	0.209352	13.5336	1.81689	0.0400002	0.121944	1.12764	3.7245	4.07128	0.293028	6.25049	18.5089	7.79578		5.03	820	Below LOD	392	0.6	2.7	42.3	18	148	56	36.2	182	9.91	2	10.4	697	30.4	63.2	7.13	26.2	5.28	0.74	5.68	0.85	5.93	1.33	3.62	0.455	3.29	0.516	5.63	0.86	1.9	19.1	16.2
Ototoka 521_7	74.8073	0.233298	13.8118	2.39757	0.071677	0.10989	1.28548	3.77375	3.50927	0.256833	6.99012	21.3171	7.28302		5.53	1076	Below LOD	600	0.79	1.89	48	17.7	120.6	82.7	35.1	291	10.09	2	8.35	622	25.2	57.3	6.34	24.3	4.76	1.06	5.15	0.75	5.37	1.19	3.09	0.499	3.47	0.541	7.19	0.79	1.38	16.8	13.13
Ototoka 521_8	74.3131	0.239814	13.8333	2.39303	0.0855313	0.128702	1.31827	3.94589	3.74234	0.245181	6.46704	19.8574	7.68823		5.68	1270	Below LOD	704	0.9	2.11	53.6	19.09	122.4	103.3	38	305	10.46	2.22	8.32	662	29.6	57	6.52	25.1	5.12	1.102	5.5	0.83	6.07	1.21	3.41	0.54	4.06	0.58	7.33	0.739	1.5	20.4	13.3
Ototoka 521_9	75.0115	0.161533	13.3546	2.02352	0.0254147	0.064492	0.860919	3.81219	4.68589	0.262521	4.91082	16.0079	8.49808		5.64	1322	0.25	630	0.84	2.25	66	18.55	128.7	106.6	36.3	295	12.55	2.22	8.4	778	27.89	55.6	6.5	28.5	6.38	1.15	5.68	0.98	6.1	1.253	3.63	0.641	4.42	0.608	7.79	0.837	1.84	21.1	13.41
Ototoka 521_10	74.0817	0.279219	13.9082	2.5398	0.0299063	0.123865	1.3228	4.23765	3.47688	0.228188	5.25956	21.3069	7.71453		5.09	1293	4.07	445	1.94	3.29	35.3	19.9	132.2	119.1	30.9	257	7.47	2.49	11.06	639	26.2	54.2	5.77	22.2	4.66	0.81	4.5	0.696	4.21	0.996	2.98	0.45	3.38	0.466	6.73	0.66	1.98	17.2	15.52
Ototoka 521_11	74.029	0.247806	13.9549	2.48061	0.10058	0.103403	1.30972	4.34049	3.43343	0.264293	5.54827	21.5612	7.77392		6.2	1600	1.54	692	1.08	2.83	68	19.1	147.5	119.3	38.6	313	13.52	1.88	8.88	835	29.6	58.9	7.06	32.9	6.46	1.07	6.35	1.05	6.46	1.28	3.78	0.76	4.58	0.66	8.14	0.88	2.27	21.8	13.7
Ototoka 521_12	74.4113	0.24174	13.7838	2.56316	0.0417572	0.087982	1.20143	4.25307	3.41579	0.264867	6.20391	21.7845	7.66885		7.18	1660	1.08	709	1.2	3.09	72.6	20.2	167.1	119.8	39.8	336	14.56	2.18	10.26	878	31.4	63.4	8.47	35.1	7.69	1.3	7.9	1.2	6.73	1.33	4.37	0.758	4.55	0.663	8.66	1.099	2.41	24.6	14.89
Ototoka 521_13	74.2262	0.23877	13.7603	2.53877	0.114696	0.126647	1.2851	4.35882	3.3507	0.244058	5.54757	22.1525	7.70952		5.98	2210	14	780	1.9	4.4	63	18.2	127	134	34.3	285	11.6	2.48	8.3	766	26.9	52.3	6.02	23.8	5.7	1.02	5.29	0.71	5.4	1.17	3.3	0.537	3.56	0.43	6.1	0.81	1.48	24.5	11.4
Ototoka 521_14	74.2051	0.204162	13.9724	2.569	0.0800047	0.0977219	1.2905	3.91556	3.66553	0.243353	6.25557	20.2441	7.58109		5.12	1290	4.31	407	1.71	2.43	51.5	17.3	146	125.4	31.4	260	8.66	1.89	9.93	881	27.9	54.4	6.09	25.5	5.94	1.164	4.96	0.784	5.17	1.02	3.14	0.566	4.25	0.514	7.08	0.671	1.89	23.4	15.47
Ototoka 521_15	74.5242	0.249014	13.8653	2.56039	0.0534216	0.101182	1.19037	3.74428	3.71184	0.247873	7.96476	20.0774	7.45612		6.62	1391	Below LOD	633	0.9	2.32	62.6	18.1	142.8	102.5	35.7	349	12.19	2.14	9.88	755	27	63.5	7.5	29.6	5.97	1.27	6.56	0.992	6.28	1.41	4.37	0.666	4.29	0.65	9.16	0.97	1.84	19.7	14.14
Ototoka 521_16	74.6869	0.201859	13.9383	1.78755	0.00445126	0.139924	1.24058	4.07055	3.92986	0.26668	6.39365	19.005	8.0004		8.8	2100	5.2	972	1.75	Below LOD	60.5	27.6	187.7	158.9	53	438	16.22	3.06	12.08	944	39.4	82.5	9.41	37.3	7.5	1.56	7.86	1.23	8.27	1.77	4.77	0.739	5.07	0.91	10.95	1.39	2.16	28.7	20.6
Ototoka 521_17	74.4085	0.232771	14.0109	2.03125	0.0521563	0.163036	1.53099	4.63172	2.93866	0.250871	5.73205	25.3206	7.57038		7.02	1450	0.5	636	0.95	2.41	52	17.1	144	103.2	35.2	332	12.07	1.8	9.32	734	25.8	59.6	7.55	28.9	5.84	1.18	6.1	0.86	5.79	1.27	4.17	0.592	3.57	0.529	8.05	0.95	2.06	18.1	12.1
Ototoka 521_18	73.912	0.214788	13.8888	2.69372	0.0946418	0.134199	1.28405	4.35915	3.41867	0.282706	5.78514	21.6201	7.77783		6.48	1355	Below LOD	740	0.9	2.26	78.6	20.47	138.6	120.4	41.8	346	12.17	2.1	9.31	795	32.6	65.5	7.51	28.8	6.81	1.27	6.5	1.064	7.4	1.53	4.34	0.64	4.55	0.679	8.89	0.873	1.74	23.9	15.96
Ototoka 521_19	74.2079	0.215142	13.8553	2.55705	0.078437	0.111751	1.30045	4.07352	3.60039	0.261893	6.50676	20.6111	7.67391		6.15	1290	0.6	621	1.09	Below LOD	36	18.7	130	84.3	31.1	281	10.38	2.22	8.58	609	22.5	51.6	6.26	24.1	5	0.91	4.5	0.64	4.91	0.99	3.17	0.46	2.86	0.505	6.8	0.89	1.74	16.2	10.78
Ototoka 521_21	74.2708	0.285807	14.0585	1.97967	0.0556955	0.163849	1.34881	3.90566	3.93118	0.255954	5.73738	18.8927	7.83684		6.52	1440	0.7	690	1.01	Below LOD	37.5	17.2	132	99	37	290	11.2	1.13	6.4	570	20.2	37.1	4.7	21.9	2.94	0.72	5.104	0.5	3.731	1.099	1.47	0.44	3	0.209	4	0.52	1.11	13.09	7.6
Ototoka 521_22	74.2571	0.22452	13.7126	2.75813	0.0656506	0.132992	1.30837	4.11379	3.42685	0.250498	6.06834	21.6692	7.54064
Ototoka 521_25	74.4068	0.199206	13.7149	2.57615	0.0448063	0.104562	1.29247	4.09117	3.56991	0.239251	5.14736	20.8428	7.66108
Average	74.3739	0.231255	13.8274	2.40701	0.0627682	0.117067	1.26076	4.11034	3.60949	0.257311	5.99903	20.7741	7.71983		6.17556	1396.06	2.98455	633.056	1.09244	2.60467	55.3611	19.1339	142.194	107.322	37.0444	299.506	11.6428	2.15333	9.44	757.5	28.605	59.1722	6.99667	28.1056	5.82111	1.08922	5.93689	0.899278	6.00172	1.26267	3.62056	0.588056	3.98222	0.572667	7.48889	0.880389	1.81778	20.7661	14.1061
Standard Deviation	0.356593	0.0290759	0.16297	0.303658	0.0274434	0.0239819	0.122631	0.249175	0.354499	0.0148951	0.693985	1.84256	0.235671		0.911013	345.489	4.06491	146.052	0.439346	0.633909	13.3848	2.33514	19.9152	24.3238	4.9639	55.5069	2.04207	0.396069	1.4974	106.375	4.21219	9.30324	1.15113	4.50326	1.11619	0.207479	1.0231	0.202273	1.11676	0.190531	0.749757	0.10963	0.620773	0.140022	1.53926	0.191035	0.357089	3.74098	2.75678
Hikuroa Pumice _01	76.8938	0.0721058	12.4514	1.52919	0.0558243	0.0943796	0.895786	3.76584	3.95698		3.67609	19.4325	7.72282		13.8	485	Below LOD	311.1		0.35	48.7	16.2	127.6	59.1	26	126.1	7.44		6.21	794	23.86	49	5.36	20.8	4.28	0.85	3.68	0.59	4.45	0.95	2.45	0.5	2.87	0.508	4.1	0.504	1.74	18.38	10.61
Hikuroa Pumice _02	77.977	0.0908759	12.1134	1.37033	0	0.0475922	0.754756	3.5456	3.90545		5.58833	19.9662	7.45106		15.1	450	0.7	315.9		1.81	48.1	15.6	121.4	56.3	25.98	120.8	7.46		5.78	791	23.46	49.1	5.31	22	4.41	0.79	4.29	0.88	4.86	0.81	2.32	0.6	2.65	0.52	3.66	0.54	2.04	18.58	10.63
Hikuroa Pumice _03	77.295	0.0903012	12.4005	1.52697	0.00305067	0.068472	0.882973	3.90974	3.61214		3.85633	21.3987	7.52188		16.3	479	2.2	325.3		1.74	49	15.6	130.1	55.7	26.3	120.8	7.71		6.05	789	22.73	50.1	5.23	22.4	4.91	0.8	3.93	0.67	4.55	0.9	2.4	0.473	3.03	0.46	3.56	0.62	1.54	18.72	10.69
Hikuroa Pumice _04	77.1849	0.111888	12.3616	1.61546	0.0494302	0.0858508	0.899421	3.84371	3.61159		5.06129	21.3714	7.4553		19	455	Below LOD	323		2.5	37.6	15.4	132.9	58.4	25.4	125.3	6.64		6.41	813	23.64	50	5.11	21.4	4.7	0.92	4.23	0.67	4.48	0.96	2.85	0.43	2.99	0.358	3.46	0.55	1.4	17.9	10.79
Hikuroa Pumice _05	77.4226	0.08466	12.4552	1.56367	0.0344403	0.0476364	0.843463	3.77263	3.56569		3.48237	21.7132	7.33833		15.6	509	1.9	314		3.3	49.5	15.9	133.4	59.1	26.2	118.1	6.99		6.46	812	23.8	49.9	5.27	21.4	4.9	1.22	3.38	0.63	4.27	0.88	2.9	0.53	3.22	0.516	4.28	0.393	0.86	18.51	10.12
Hikuroa Pumice _06	77.3677	0.069116	12.4674	1.48042	0.0254451	0.0522161	0.867191	3.24492	4.20539		3.94282	18.3973	7.45031		18.7	478	Below LOD	319.8		1.19	43.3	16.3	127.8	55.9	25.19	118.6	7.42		5.96	789	23.4	49.4	5.12	20.51	4.3	0.58	4.37	0.78	3.73	0.89	2.73	0.48	2.92	0.36	3.69	0.64	1.72	18.91	10.52
Hikuroa Pumice _08	77.7372	0.0857722	12.0953	1.44234	0.0338664	0.0383904	0.868123	3.73497	3.68137		4.7338	21.1164	7.41634		14.9	395	Below LOD	279.7		2.8	41.7	13.7	138.9	45.7	26.07	89	6.7		6.78	846	24.62	51	5.82	21.1	4.56	0.76	4.15	0.86	5.12	1.07	2.64	0.43	3.07	0.57	3.11	0.58	1.9	18.78	11.18
Hikuroa Pumice _09	77.3875	0.0695463	12.5024	1.23521	0.0440381	0.0448789	0.857994	3.72106	3.85937		4.53707	20.0519	7.58043
Hikuroa Pumice _10	78.9591	0.0894974	11.3659	1.54674	0	0.0683946	0.923518	3.1026	3.78509		5.27542	20.8606	6.88768
Hikuroa Pumice _11	77.2612	0.0412572	12.528	1.39053	0.0325802	0.05065	0.848216	3.89279	3.74121		0.972672	20.6514	7.634		15.9	412	0.8	282.8		1.42	38.5	13.9	137.6	46.8	25.5	90.2	7.26		6.62	842	24.81	51.5	5.78	21.4	4.67	0.62	3.46	0.51	4.4	0.71	2.47	0.49	2.29	0.46	3.3	0.48	1.88	19.6	11.22
Hikuroa Pumice _12	77.6125	0.0799663	12.3359	1.40307	0.0139169	0.0775598	0.841905	3.75762	3.57784		1.64892	21.6925	7.33547		17.4	447	0.4	344		0.7	43.9	13.3	128.4	57.6	25.08	119.8	7.15		5.73	783	22.92	48.8	5.28	20.8	3.9	0.4	3.75	0.57	3.87	0.9	2.56	0.547	2.95	0.47	3.48	0.5	1.53	18.7	10.04
Hikuroa Pumice _13	77.6453	0.0901806	12.2361	1.20661	0.0208359	0.079534	0.764564	3.98542	3.75484		1.46253	20.6787	7.74027		16.1	402	Below LOD	294.7		1.54	45.7	11	135.4	47.7	25.59	89.5	6.93		6.55	843	24.19	51.5	5.72	20.8	4.71	0.48	3.79	0.64	4.29	0.81	2.68	0.425	3.22	0.376	3.32	0.56	1.38	18.73	11.4
Hikuroa Pumice _14	77.5347	0.0824372	12.2594	1.42682	0.0419512	0.0576484	0.824595	3.83933	3.72902		2.11883	20.7923	7.56835		17.5	465	0.7	329		2.9	49.5	12.7	125.3	59.2	25.06	118	7.32		5.97	790	22.65	48.7	5.36	19.45	4.38	0.82	4.51	0.73	4.34	0.81	2.71	0.41	2.58	0.543	4.02	0.5	1.17	18.4	10.04
Hikuroa Pumice _15	77.5947	0.0864639	11.9958	1.45187	0.0423906	0.0679609	0.866109	4.11748	3.53971		3.13334	21.9212	7.65719		14.5	493	Below LOD	346.5		5	53.8	17.5	126.4	57.6	25.58	119.2	7.4		5.97	798	23.34	50.1	5.5	21.9	4.37	0.42	3.39	0.69	4.15	0.83	2.79	0.47	3.02	0.451	3.9	0.64	1.84	17.75	10.45
Hikuroa Pumice _16	77.8521	0.079087	12.2156	1.58327	0.0296668	0.0677896	0.836206	3.50781	3.62972		4.43001	21.4485	7.13753		12.6	490	0	365		0.7	50.7	14.7	131.3	57.9	25.2	116.8	7.63		6.35	806	22.4	50	5.53	19.4	4.11	0.64	4.17	0.69	3.79	1.05	2.86	0.442	2.85	0.472	4.02	0.56	1.29	18.01	11.37
Hikuroa Pumice _17	77.386	0.080066	12.4187	1.492	0.0473949	0.0851451	0.851994	3.75876	3.66175		3.04716	21.1336	7.42051		16.1	482	Below LOD	344.3		1.3	42.7	16.6	123.4	57	24.57	116	6.76		5.98	786	22	48.8	5.01	19.7	3.88	0.6	3.49	0.64	3.73	0.911	3.12	0.39	3.33	0.45	3.8	0.725	1.45	18.7	11.02
Hikuroa Pumice _18	77.7312	0.0562386	12.2941	1.37966	0.0101568	0.0542784	0.821959	3.61942	3.78886		3.74214	20.5157	7.40827		15.8	479	0.2	362		0.2	48.5	15.8	125	58.2	24.9	117.3	7.35		5.98	798.5	23.12	49.1	5.2	21.9	3.96	0.84	4.81	0.6	4.3	1.01	2.41	0.49	2.84	0.45	3.91	0.71	1.35	18.77	10.96
Hikuroa Pumice _19	77.4015	0.0811935	12.6716	1.40439	0	0.0722775	0.879485	3.62126	3.65296		3.13552	21.1887	7.27422		14.5	631	3.9	338		6	54.3	14.1	125.3	68.9	24.6	121.7	7.64		5.85	817	22.26	47.7	5.13	18.6	4.3	0.32	3.7	0.72	4.62	1	2.37	0.326	2.84	0.46	3.71	0.72	1.63	19.44	10.26
Average	77.5691	0.0800363	12.2871	1.44714	0.0269438	0.0644808	0.85157	3.70783	3.73661		3.54692	20.7962	7.44444		15.8625	472	1.2	324.694		2.09062	46.5938	14.8937	129.388	56.3188	25.4512	114.2	7.2375		6.16562	806.094	23.325	49.6688	5.35813	20.8475	4.39625	0.69125	3.94375	0.679375	4.30938	0.905688	2.64125	0.464562	2.91688	0.464	3.7075	0.576375	1.545	18.6175	10.7062
Standard Deviation	0.432009	0.0151381	0.28565	0.110413	0.018625	0.0161186	0.0426418	0.246313	0.166057		1.33134	0.886997	0.209368		1.70171	53.9716	1.251	25.2024		1.62068	4.937	1.6747	5.12912	5.62367	0.548499	12.5281	0.341262		0.321786	21.1709	0.81759	1.05244	0.247796	1.07921	0.329482	0.229692	0.432279	0.0993626	0.394486	0.0983204	0.228732	0.0655794	0.258708	0.0609688	0.323965	0.0941487	0.307311	0.487641	0.456536
P = proximal
D = distal
K = Kaipo Bog sample
XXX = Pillans et al., 2005 sample number
n = number of shards analysed, (trace in parenthesis)
H2OD* = water and volatiles calculated by difference
Outliers removed
Kupe 481_5	76.4417	0.190088	12.4483	1.5266	0.0441514	0.0854626	1.00767	3.68999	4.566	0.406373	8.38479	16.7415	8.25598
Maketu-P_15	73.0303	0.466509	14.5947	2.08682	0.11271	0.562079	2.02898	4.85443	2.2634	0.178883	11.4695	32.2658	7.11783
Mangahou 302_7	74.4436	0.147634	13.7829	2.12035	0.051786	0.08534	1.0927	2.31717	5.95844	0.227667	8.2532	12.4938	8.27561
Mangapipi 510_12	74.8159	0.233458	13.8606	2.35715	0.0315108	0.119549	1.16417	3.68695	3.73073	0.241971	8.30944	20.0539	7.41769
Nga Motu-Unit B-P_24	76.7321	0.185424	13.5693	1.09322	0.0730984	0.249777	1.07328	4.46803	2.5558	0.170766	12.7888	30.0227	7.02382
Okaia-P_4	77.9338	0.229126	12.8673	1.55892	0.0483438	0.215392	1.54438	2.66714	2.93559	0.43877	12.7734	26.548	5.60272
Onepuni 267_4	77.8529	0.0924714	12.311	1.23991	0.0392744	0.0999291	0.84972	3.12702	4.38771	0.262443	8.45157	17.7434	7.51472
Ototoka 521_6	75.4933	0.148876	13.5139	1.93417	0.0517939	0.0577876	0.971991	3.5157	4.31254	0.273498	8.29034	17.5055	7.82824
Rerewhakaiitu -RNL_09	78.63	0.11	12.47	0.76	0.05	0.14	0.84	3.54	3.29	0.17	8.13	23.8997	6.83
Rewa 304_5	74.9165	0.223169	13.5075	2.0397	0.0664092	0.117214	1.35272	3.60716	4.16957	0.716169	14.9202	17.9674	7.77674
Rotoiti Ig-P_2	78.3541	0.142998	12.512	0.858981	0.0407113	0.153234	0.864515	3.62376	3.44959	0.553347	13.7618	22.7141	7.07334
Rotoiti Ig-P_6	77.9782	0.128164	12.7602	0.568839	0.0295878	0.156051	0.755623	4.4257	3.19755	0.198833	21.9347	24.3868	7.62325
Rotoiti Ig-P_8	78.4115	0.147201	12.6658	0.75741	0.0769083	0.137501	0.76723	3.68898	3.34741	0.176933	9.90119	23.4246	7.03639
Rotoiti Ig-P_13	78.432	0.149479	12.7089	0.690472	0.0409706	0.132647	0.815108	3.77921	3.2512	0.200341	12.0525	24.124	7.03042
Rotorua - LR_01	77.75	0.08	12.29	1.04	0.03	0.09	0.64	4.1	3.79	0.19	8.01	20.5145	7.89
Rotorua - RNL_06	77.32	0.08	12.27	1.12	0.05	0.05	0.62	4.03	4.27	0.2	8.8	18.1077	8.3
Unit K - K4_14	76.3731	0.190121	13.2701	1.74689	0.0519503	0.152472	1.327	3.87292	3.01535	0.302385	8.24556	25.3281	6.88827
Unit L_7	78.4447	0.138311	12.7351	1.12186	0.0320054	0.244051	1.14601	2.88907	3.24876	1.20006	32.2404	24.146	6.13783
Whakatane-P_5	79.7978	0.171005	12.5041	1.09169	0.0569932	0.175511	1.05618	1.41084	3.73585	0.209306	8.57637	21.36	5.14669
Opepe-K9_11	76.9868	0.386694	13.2209	1.17205	0.00245601	0.059125	2.37764	4.00505	1.78929	0.0518678	1.88804	43.0264	5.79434
Kawakawa-P_17	80.4555	0.264665	13.3139	1.51967	0.0797526	0.184148	1.42306	0.50222	2.25706	0.155312	7.84758	35.6461	2.75928		5.01	1474	6.6	344	1.61	1.53	36.8	14.2	117.6	105.7	20.5	185	7.49	1.96	6.89	666	21.4	42.7	4.65	17.2	3.33	0.66	3.16	0.53	3.24	0.75	1.84	0.427	2.71	0.44	4.93	0.77	1.57	15.83	12.1
Okaia-P_19	78.3791	0.140133	12.7633	1.34166	0.0988384	0.12111	1.21899	3.6059	2.33095	0.171715	4.91963	33.6254	5.93685		6.2	890	2.8	460	0.93	5.4	13.5	14.2	159	89	25.5	139	7.7	2.22	7.7	620	21.6	40	4.7	19.2	2.3	0.63	4.3	0.34	3.5	0.86	2.8	0.47	3.04	0.38	4.5	0.83	1.3	12	10.5
Rotorua - K15_07															22.2	381	2.3	494	0.74	1.31	26.5	13.5	151.5	35.8	24.6	68.2	9.35	3	7.61	823	28.8	58.5	5.9	22.6	4.2	0.6	3.2	0.51	3.54	0.692	2.48	0.379	2.84	0.54	2.47	0.65	1.98	16.3	15.42
Kaharoa-P_22															35	440	Below LOD	440	0.15	1.7	41	12	130	27	150	16000	6.5	1	5.3	830	17	41	4.4	14	3	0.51	7.6	1	18	6.3	25	5.8	52	14	280	0.79	1.6	17	29
Rerewhakaiitu -K17_07															29	528	12.6	621	1.5	5.3	18	16.5	172	53.6	17.2	72	11.2	6.5	16.1	890	27	57.2	5	16.4	1.6	1.2	3.6	0.91	4	1.35	1.4	0.69	1.1	0.21	2.9	0.82	2	28.5	13.1
Nga Motu-Unit B-P_15															6.15	4187	92.2	589	20.45	38.4	64.4	23.01	31.6	478	12.05	121.2	6.62	2.84	1.99	300.8	11.69	25.96	2.8	12.91	2.9	0.87	2.56	0.371	2.22	0.419	1.33	0.149	0.96	0.137	2.97	0.399	0.65	10.94	2.36
Nga Motu-Unit B-P_16															5.92	4042	92.2	593	20.03	36.4	63.9	23.1	30.2	487	11.72	117.8	6.56	2.58	2.03	302.2	11.93	24.9	2.82	12.75	2.51	0.82	2.57	0.412	2.28	0.433	1.07	0.163	1.56	0.202	3.21	0.402	0.63	11.5	2.28
Lower Griffins Road 309_1															10.6	5490	167	506	13.4	317	107	72	123.8	158	30.9	363	18.3	3.02	8.13	1510	32.4	43.1	7.77	30.1	6.4	1.6	5.23	0.9	6.18	1.28	3.27	0.447	3.77	0.469	10.1	1.73	2.79	46.3	24.1
Onepuhi 267_6															4.78	2000	78	295	10.6	87	40.3	22	150	76.7	19.2	74.6	6.4	3.34	9.19	446	16.6	30.8	4.87	18.8	4.29	0.93	3.85	0.58	3.57	0.81	2.21	0.328	2.12	0.367	2.15	0.66	1.57	20.7	13.8
Onepuhi 267_20															4.79	1220	33	358	5	110	61	20.8	165	61.9	31	83	7.7	2.89	8.7	610	21.2	40.1	5.11	17.5	3.5	0.77	3.2	0.52	3.8	0.64	2.15	0.29	2.65	0.33	2.15	0.79	1.58	18.8	14.1
Waimihia - K3_4															17.7	1630	45	766	0.81	79	52.3	46	90.9	111.5	51.8	268	10.4	1.63	7.43	550	33.3	87	9.6	32.5	7.9	1.61	9	1.2	7.3	1.78	5.1	0.72	5.1	1.31	7.1	0.89	3.24	21.4	12.8
Kupe 481_11															2.7	900	13.4	1820	45	125	24.3	13	61.6	63	12.7	79	5.37	1.06	3.13	277	12.9	67	1.92	11.3	2.82	0.376	2.54	0.333	1.96	0.44	1.38	0.225	1.42	0.207	2.13	0.41	0.98	16.9	5.72
Kupe 481_24															5.7	910	15.8	315	6.9	32	45.8	16.1	299	76.9	17.9	95	7.5	2.01	6.3	1540	19.3	44	6.4	17.1	3.6	0.7	3.6	0.57	3.23	0.59	2.13	0.234	1.82	0.31	2.87	0.56	1.15	22.6	8.2
Potaka 305_2															4.95	890	5.8	318	1.42	145	30.4	16.7	153	75.2	23.8	108	9.1	2.11	8.7	1230	28.2	53.2	11.1	21.8	5.1	0.66	3.99	0.69	4.3	0.81	2.48	0.356	2.64	0.356	3.53	0.86	2.46	21.9	13.8
Rotorua - LR_02															16.4	422	2	485	0.37	2.3	140	14.8	148	47	20	77.2	8.04	2.1	7.54	735	22.7	46.4	4.89	16.4	3.08	0.39	2.93	0.48	3.13	0.75	2.09	0.31	2.07	0.272	2.59	0.87	1.45	20.6	11.94
Kawakawa-P_20															4.71	920	2.26	429	1.62	3.6	33	41	128	92	22.9	125	7.7	1.24	8.4	633	22.2	41.9	4.75	18.8	4.5	0.43	3.8	0.81	1.72	0.53	1.5	0.34	2.27	0.45	3.35	0.66	2.1	17.7	9.7
Poihipi-K8_1															5.9	2120	26.6	199	2.5	9.3	40	54.2	328	64	22	121	14.3	1.5	9.2	1700	27.6	157	6.6	20.4	3.8	1.8	3.7	1.1	3.2	0.65	2.41	0.2	2.2	0.23	2.3	1.4	3.1	68.4	10.2
Rewa 304_6															6.3	950	16	453	3.8	18.3	40.1	18.6	95	300	24.1	140	8.3	1.32	6.27	602	28.1	54.5	6.4	26.6	5.2	0.75	4.69	0.67	3.89	0.78	2.55	0.37	2.42	0.39	3.74	0.63	0.73	19.1	11.9
Rotorua - K15_03															19.5	374	1.9	386	0.45	7.8	19	20.9	121	310	12.6	45.1	6.4	3.6	6.1	723	19.7	39.5	3.86	13	3.14	1.6	0.73	0.37	2.91	0.43	1.31	0.15	1.61	0.22	1.23	0.55	2.5	17.8	8.5
Hauparu-P_15															5.58	2150	11	685	1.25	5.3	40.4	19.4	100.3	224	31.9	255	11.1	1.53	6.8	3400	30.1	45.2	6.47	25.7	5.6	0.99	5.02	0.73	5.34	1.12	3.25	0.568	3.51	0.54	6.19	0.73	1.02	13	9.44
Kupe 481_19															6.58	1313	2.25	450	1.12	17.1	40.7	21.3	173	82.9	37.3	208.2	11.95	2.73	8.9	1908	31.7	71.1	13.57	30.4	5.9	0.86	5.6	0.88	5.63	1.13	3.95	0.61	4.47	0.53	5.46	0.9	1.77	21	14.63
Kupe 481_20															7.6	1200	1.27	483	1.14	8.6	58.7	25.5	222	59.6	50.7	173	14.9	2.89	12.1	2530	43.2	88.7	17.3	39.7	7.98	0.98	7.67	1.3	7.96	1.77	5.51	0.75	6.27	0.83	6.4	1.26	2.76	31.1	21.3
Whakatane-P_21															6.1	600	1.35	392	0.56	1.18	30.1	18.9	103	53	32.7	87	7.3	2.4	6.7	860	120	277	32	131	27.6	1.38	15.6	1.53	8.3	1.18	2.93	0.38	3.6	0.53	3	0.72	1.5	15.1	12.8
Poronui-K10_23															7.8	1140	3.09	426	1.8	4.66	47.6	15.4	115.7	101.6	28.9	206	8.38	1.55	7.2	661	25.8	53.7	6.3	22.8	4.72	1.08	44	0.72	6	0.98	3.34	0.372	3.06	0.55	5.1	0.53	1.12	17.6	10.74
Onepuhi 267_7															4.65	728	2.79	437	1.18	Below LOD	30.2	15.1	166	76.2	18.9	101.6	7.59	2.62	9.7	810	28.1	52	5.1	16.8	3.4	0.53	3.7	0.41	3.19	0.63	2.05	0.251	2.43	0.318	3.24	0.9	1.75	19.2	32
Unit K - K4_4															4.96	813	0.64	391	0.52	42	67	13.1	71.5	128.6	22.3	159	6	0.94	3.33	470	18.5	40.1	4.28	17.7	3.74	1.06	3.73	0.63	3.8	0.81	2.31	0.334	2.25	0.396	4.68	0.5	2.7	40	7.6
[truncated: 1 more columns]

## Sheet: SM Table 3 - Major stds
	SM Table 3. Major element standard analyses
	Note, all data have been standardised using VG-568 as an internal standard value, this process is discussed in detail in the text Sect. 2.3
	3.1. Secondary standard (ATHOG and VG-A99) overview for major element analysis
	ATHOG	SiO2	TiO2	Al2O3	FeOt	MnO	MgO	CaO	Na2O	K2O	Cl
	Reference*	75.6	0.255	12.2	3.27	0.106	0.103	1.7	3.75	2.64	0.0243	*reference values from Jochum et al., 2006; Table 13h "Preferred Value"
	Average	75.8814	0.275348	12.3097	3.27412	0.0899193	0.0895901	1.79276	3.4263	2.72615	0.0421438
	2*Stdev	0.879337	0.03358	0.20555	0.24091	0.0659373	0.0309637	0.101583	0.63758	0.145273	0.0152118
	Offset (wt%)	0.281429	0.0203481	0.109658	0.00411873	0.0160807	0.0134099	0.0927606	0.323698	0.0861531	0.0178438
	VG-A99	SiO2	TiO2	Al2O3	FeOt	MnO	MgO	CaO	Na2O	K2O	Cl
	Reference**	50.82	4.05	12.49	13.29	0.17	5.04	9.39	2.61	0.816	0.0205	**reference values from Streck and Wacaster 2006
	Average	50.821	4.76043	12.3677	13.3143	0.173116	4.69228	9.5888	2.55796	0.855967	0.0223582
	2*Stdev	0.537084	0.312616	0.201056	0.811156	0.115916	1.15743	0.299466	0.183523	0.055314	0.0134004
	Offset (wt%)	0.000977607	0.710431	0.12233	0.0242793	0.00311649	0.347718	0.198797	0.0520361	0.0399665	0.00185824
	3.2. Primary Standard - VG-568															3.2. Element plots for primary standard - VG-568 - Orange line shows the reference data value
plot #	Date	SiO2	TiO2	Al2O3	FeO	MnO	MgO	CaO	Na2O	K2O	Cl	Total	Comment
0	REFERENCE	76.96	0.08	12.17	1.08	0.02	0.03	0.45	3.52	4.93	0.1013		VG-568	reference values from Streck and Wacaster 2006
1	10_12_19	77.2405	0.0833333	12.2512	1.03229	0	0.02798	0.433099	3.59643	4.99313	0.094356	99.658	VG-568_2
3	10_12_19	76.6226	0.07	12.0353	1.22146	0.0268889	0.0386783	0.455572	3.78337	5.05042	0.107835	99.3043	VG-568_4
4	10_12_19	76.6266	0.0988889	12.1264	1.04145	0.0281111	0.0197506	0.449443	3.52075	4.91608	0.105589	98.8275	VG-568_5
5	10_12_19	76.7699	0.08	12.1165	1.16349	0.0232222	0.0345636	0.459657	3.58822	5.01486	0.106712	99.2505	VG-568_6
6	10_12_19	77.372	0.0877778	12.0938	1.10145	0	0.0222195	0.444336	3.47698	5.02177	0.107835	99.6203	VG-568_7
7	10_12_19	76.7294	0.0888889	12.1957	0.976355	0.00733333	0.0337406	0.443314	3.40494	4.97633	0.0999725	98.856	VG-568_8
8	10_12_19	76.852	0.0666667	12.1482	0.993644	0	0.028803	0.44025	3.67212	5.00103	0.101096	99.2027	VG-568_9
10	10_12_19	76.9795	0.0888889	12.2532	1.11671	0.0207778	0.0197506	0.450464	3.63838	5.01782	0.107835	99.5855	VG-568_11
11	10_12_19	76.6621	0.0844444	12.1948	1.01602	0.0305556	0.0444389	0.430035	3.72592	4.96745	0.102219	99.1558	VG-568_12
12	11_12_19	76.5244	0.0698789	12.2517	1.04987	0	0.0252294	0.43938	3.5737	4.80379	0.10995	98.738	VG-568_1
13	11_12_19	76.9038	0.0829071	12.0687	1.05867	0.0289474	0.040367	0.444549	3.51419	5.02536	0.0930345	99.1675	VG-568_2
14	11_12_19	76.8837	0.0983042	12.1527	1.12808	0.0231579	0.0343119	0.45282	3.35251	4.76686	0.10995	98.8925	VG-568_3
15	11_12_19	77.1196	0.0781696	12.1857	1.15154	0.037218	0.0262385	0.455921	3.627	5.04732	0.104664	99.7287	VG-568_4
16	11_12_19	76.8054	0.0686945	12.2177	1.1183	0.0198496	0.0343119	0.450752	3.52129	4.80479	0.112064	99.0411	VG-568_5
17	11_12_19	77.0935	0.0758008	12.1147	1.01371	0	0.0302752	0.443515	3.60924	4.99542	0.0962062	99.3762	VG-568_6
18	11_12_19	77.1347	0.0935666	12.2177	1.10657	0.023985	0.0383486	0.450752	3.48665	4.9555	0.0993778	99.5078	VG-568_7
19	11_12_19	77.3254	0.0698789	12.1827	1.13199	0.0223308	0.0312844	0.43938	3.57193	4.99143	0.0993778	99.7663	VG-568_8
20	11_12_19	77.1015	0.0994886	12.0697	1.07627	0.0413534	0.0282569	0.454887	3.3987	4.97745	0.095149	99.2477	VG-568_9
21	11_12_19	76.9158	0.103042	12.2917	1.00197	0.0140602	0.0111009	0.45282	3.61368	4.98045	0.0898629	99.3847	VG-568_10
22	11_12_19	76.7522	0.0402692	12.1167	1.04303	0.00909774	0.0302752	0.465226	3.45111	4.88164	0.104664	98.7896	VG-568_11
23	11_12_19	77.2601	0.0509287	12.1227	1.03717	0.0173684	0.0555046	0.451786	3.35429	4.85469	0.102549	99.2046	VG-568_12
24	12_12_19	76.8136	0.0688779	12.2391	1.0416	0.0240964	0.0337662	0.465499	3.38063	4.97593	0.0932957	99.0432	VG-568_1
25	12_12_19	76.8637	0.0801694	12.0845	1.16153	0.0180723	0.0450216	0.449737	3.3159	4.91821	0.104958	98.9369	VG-568_2
26	12_12_19	76.7105	0.0666196	12.2202	1.12188	0.0481928	0.0233766	0.472855	3.44003	4.78585	0.115559	98.8895	VG-568_3
27	12_12_19	77.2561	0.09259	12.3149	1.12188	0.00240964	0.025974	0.456042	3.70867	5.06649	0.0964762	100.045	VG-568_4
28	12_12_19	76.9238	0.0756528	12.278	1.03483	0.0120482	0.0372294	0.444483	3.56061	5.04161	0.103897	99.4083	VG-568_5
29	12_12_19	77.2031	0.0756528	12.1733	1.09286	0.0337349	0.034632	0.438179	3.53312	4.97294	0.095416	99.5575	VG-568_6
30	12_12_19	76.4633	0.0880734	11.9818	1.13155	0.0337349	0.038961	0.437128	3.58543	4.9202	0.108138	98.6801	VG-568_7
31	12_12_19	77.148	0.0745236	12.281	1.20118	0.0144578	0.0164502	0.478109	3.47993	5.01474	0.0795133	99.7084	VG-568_8
32	12_12_19	76.9978	0.105011	12.1095	1.13348	0.0349398	0.0337662	0.464448	3.42407	4.86148	0.0901151	99.1645	VG-568_9
33	12_12_19	77.3472	0.09259	12.1055	1.03	0	0.0147186	0.438179	3.50918	4.91124	0.0901151	99.4486	VG-568_10
34	12_12_19	76.7526	0.0767819	12.1503	0.985511	0.0493976	0.0363636	0.430823	3.43914	4.94408	0.0901151	98.865	VG-568_11
35	12_12_19	77.114	0.0812985	12.2441	0.986478	0.0277108	0.034632	0.439229	3.4817	4.75599	0.11768	99.1651	VG-568_12
36	12_12_19	77.106	0.0733945	12.1264	1.11898	0	0.0337662	0.459194	3.43382	4.86546	0.0932957	99.217	VG-568_13
37	12_12_19	77.2171	0.100494	12.0795	1.08803	0.013253	0.0294372	0.443433	3.43914	4.87641	0.111319	99.2868	VG-568_14
38	12_12_19	76.8587	0.0971066	12.1653	1.01936	0.0277108	0.0268398	0.445534	3.75034	4.80675	0.100717	99.1976	VG-568_15
39	12_12_19	77.141	0.0654905	12.2491	1.05321	0.0216867	0.017316	0.418214	3.44801	4.84954	0.106018	99.2636	VG-568_16
40	12_12_19	76.8627	0.0711362	12.2571	1.07352	0	0.0380952	0.464448	3.46397	5.01773	0.12192	99.2487	VG-568_17
41	12_12_19	76.7115	0.0688779	12.0426	1.11511	0	0.0285714	0.469702	3.6537	4.98787	0.100717	99.078	VG-568_18
42	12_12_19	76.8507	0.0598447	12.1334	1.01549	0.0385542	0.0277056	0.443433	3.74413	5.02071	0.101777	99.334	VG-568_19
43	12_12_19	76.8587	0.0858151	12.1643	1.07352	0	0.0233766	0.441331	3.60848	5.00678	0.104958	99.2623	VG-568_20
45	13_12_19	76.5372	0.0628229	12.2259	1.17	0.00831522	0.0175506	0.451627	3.36808	4.87196	0.102781	98.7135	VG-568_2
46	13_12_19	76.8042	0.102378	12.2181	1.22835	0.0397283	0.0247773	0.450602	3.53902	4.79365	0.106976	99.2008	VG-568_3
47	13_12_19	76.8417	0.0686399	12.221	1.04143	0.00831522	0.0278745	0.477229	3.44477	4.97474	0.111171	99.1057	VG-568_4
48	13_12_19	76.7294	0.0663131	12.1946	1.0622	0.00923913	0.0289069	0.479277	3.5843	4.91797	0.106976	99.0722	VG-568_5
49	13_12_19	77.3175	0.0674765	12.2503	1.20857	0.02125	0.0423279	0.436265	3.41151	4.82791	0.103829	99.5831	VG-568_6
50	13_12_19	77.3165	0.0953978	12.1917	0.918791	0.00554348	0.018583	0.433193	3.31171	5.02173	0.0922928	99.3132	VG-568_7
51	13_12_19	77.0722	0.0744568	12.1799	1.03154	0.0258696	0.0423279	0.441386	3.72753	4.87392	0.0985855	99.4692	VG-568_8
52	13_12_19	76.8929	0.0860907	12.2503	1.07802	0.0138587	0.0258097	0.426024	3.75894	5.02271	0.100683	99.5547	VG-568_9
53	13_12_19	77.1421	0.0977246	12.2327	1.08989	0.0157065	0.0289069	0.463916	3.6342	4.91699	0.0901952	99.6222	VG-568_10
54	13_12_19	77.0751	0.0826005	12.1389	1.12352	0.011087	0.0144534	0.455723	3.44939	5.04816	0.111171	99.399	VG-568_11
55	13_12_19	76.8653	0.0814371	12.0167	1.07604	0.00923913	0.0381984	0.438313	3.58615	5.00019	0.0901952	99.1116	VG-568_12
56	13_12_19	77.0811	0.0837639	12.1496	1.15418	0.0545109	0.0443927	0.423976	3.5843	4.83084	0.101732	99.4067	VG-568_13
57	13_12_19	76.885	0.0686399	12.1917	1.04736	0.0545109	0.0361336	0.454699	3.63789	4.84259	0.0964879	99.2185	VG-568_14
58	13_12_19	76.8899	0.0791104	12.0939	1.06912	0.00831522	0.00825911	0.437289	3.44755	4.87979	0.0964879	98.9133	VG-568_15
59	13_12_19	77.0899	0.0872541	12.0343	1.09978	0.02125	0.0464575	0.469036	3.51315	5.03347	0.0964879	99.3947	VG-568_16
60	13_12_19	76.9156	0.0802737	12.1428	1.04934	0.00831522	0.0340688	0.461867	3.52978	4.97278	0.104878	99.1948	VG-568_17
61	13_12_19	76.8643	0.0756202	12.1575	0.911868	0.0249457	0.0309717	0.449578	3.31171	4.98061	0.111171	98.8071	VG-568_18
62	16_12_19	77.2054	0.0757975	12.1745	0.962284	0.0422838	0.0207273	0.428125	3.53777	4.97201	0.0998083	99.4188	VG-568_1
63	16_12_19	76.6833	0.0990258	12.0767	1.00536	0.0266232	0.0305455	0.465625	3.46353	4.82906	0.0965537	98.6797	VG-568_2
64	16_12_19	77.1203	0.101471	12.0797	1.11695	0.022447	0.0174545	0.46875	3.61019	5.02473	0.108487	99.562	VG-568_3
65	16_12_19	77.0313	0.090468	12.354	1.15024	0	0.0305455	0.471875	3.5604	4.80067	0.109572	99.4895	VG-568_4
66	16_12_19	77.4734	0.0574594	12.1997	1.10521	0.0125285	0.0370909	0.4625	3.57488	4.94261	0.0943839	99.8654	VG-568_5
67	16_12_19	76.9093	0.0819102	12.1664	1.13947	0.0114845	0.0370909	0.426042	3.55859	4.8615	0.0835352	99.1918	VG-568_6
68	16_12_19	77.0403	0.0733524	12.2168	1.20702	0.0172268	0.0305455	0.465625	3.44181	4.84629	0.0846201	99.339	VG-568_7
69	16_12_19	77.3744	0.0831328	12.1725	1.14632	0.0261011	0.0250909	0.441667	3.48526	4.85136	0.0954688	99.6058	VG-568_8
70	16_12_19	76.7823	0.0990258	12.1856	1.06409	0.0172268	0.0130909	0.4625	3.6301	4.98925	0.0965537	99.2431	VG-568_9
71	16_12_19	77.2414	0.0525692	12.2047	1.08759	0.0307993	0.0414545	0.440625	3.59208	5.04704	0.103063	99.7382	VG-568_10
72	16_12_19	76.7963	0.0537918	12.2642	1.07976	0.0297553	0.036	0.448958	3.43547	4.97404	0.0987234	99.1183	VG-568_11
73	16_12_19	76.6513	0.0709074	12.1664	1.12479	0.00261011	0.00981818	0.444792	3.33227	5.08151	0.0965537	98.8844	VG-568_12
74	16_12_19	76.7373	0.0843553	12.1301	1.16982	0.0198369	0.0261818	0.439583	3.45448	4.87671	0.121506	98.9384	VG-568_13
75	16_12_19	76.7543	0.0941356	11.9779	0.9662	0.0151387	0.0305455	0.440625	3.61652	4.81892	0.107402	98.7142	VG-568_14
76	16_12_19	76.8443	0.0843553	12.234	0.986757	0.00991843	0.0665455	0.440625	3.67084	4.98215	0.120421	99.3195	VG-568_15
77	16_12_19	76.7153	0.0782426	12.117	0.968158	0.0360196	0.0272727	0.452083	3.35581	4.98215	0.104148	98.732	VG-568_16
78	17_12_19	77.0608	0.0725624	12.1287	1.14007	0	0.0288462	0.443045	3.5314	5.08649	0.101733	99.4919	VG-568_1
79	17_12_19	77.17	0.0991686	12.2727	1.2728	0.035313	0.0288462	0.469834	3.68222	4.94759	0.122296	99.9785	VG-568_2
80	17_12_19	77.0308	0.071353	12.2345	1.05291	0.012199	0.0354396	0.45644	3.43328	4.9699	0.0952393	99.2967	VG-568_3
81	17_12_19	77.3623	0.0955404	12.0924	1.18861	0.00642055	0.0247253	0.472925	3.55139	4.95165	0.109309	99.746	VG-568_4
82	17_12_19	76.7533	0.0701436	12.1317	0.984565	0.0308186	0.0131868	0.440985	3.47326	4.81275	0.0919925	98.7108	VG-568_5
83	17_12_19	77.201	0.0580499	12.3271	1.1579	0.0417335	0.0239011	0.48838	3.57319	5.02667	0.0909103	99.898	VG-568_6
84	17_12_19	76.7273	0.0640967	12.0401	1.02815	0.0340289	0.0395604	0.467773	3.52958	4.81883	0.0919925	98.7494	VG-568_7
85	17_12_19	76.8375	0.0665155	12.1831	1.03706	0.0256822	0.0337912	0.437894	3.51051	4.97598	0.0984861	99.108	VG-568_8
86	17_12_19	76.8525	0.0798186	12.1529	1.08857	0.0269663	0.046978	0.449227	3.62498	4.88575	0.102815	99.2077	VG-568_9
87	17_12_19	77.1519	0.0773998	12.1126	1.05588	0.0295345	0.0379121	0.42759	3.47871	5.00132	0.0952393	99.3729	VG-568_10
88	17_12_19	77.0508	0.0979592	12.0501	1.12918	0.0211878	0.0313187	0.435833	3.49688	4.85026	0.10498	99.1636	VG-568_11
89	17_12_19	77.0017	0.0894936	12.1146	1.09649	0.012199	0.0313187	0.470864	3.46326	4.85533	0.110391	99.1353	VG-568_12
90	17_12_19	76.9386	0.0846561	12.1408	0.968716	0.0250401	0.0362637	0.443045	3.50596	4.91819	0.121214	99.0613	VG-568_13
91	17_12_19	76.7674	0.0798186	12.165	1.01131	0.0179775	0.0255495	0.451288	3.48688	4.8604	0.0984861	98.8656	VG-568_14
92	17_12_19	76.9647	0.0749811	12.1589	1.02418	0.0186196	0.0115385	0.449227	3.45145	4.71643	0.103897	98.87	VG-568_15
93	17_12_19	76.7013	0.0967498	12.0562	1.07668	0.0141252	0.0197802	0.423469	3.45327	4.94556	0.106062	98.7871	VG-568_16
94	17_12_19	76.9386	0.101587	12.2244	1.11729	0.0147673	0.0247253	0.474986	3.4569	4.98916	0.0746763	99.3424	VG-568_17
95	17_12_19	77.2401	0.071353	12.3543	1.13116	0.012199	0.0206044	0.436863	3.41965	5.02566	0.107144	99.7119	VG-568_18
96	17_12_19	76.6462	0.0737717	12.308	0.99546	0	0.0346154	0.431712	3.7122	4.97496	0.107144	99.1769	VG-568_19
97	17_12_19	76.8034	0.0749811	12.1519	1.043	0.0211878	0.0510989	0.42862	3.56502	4.98713	0.0919925	99.1263	VG-568_20
98	18_12_19	76.7365	0.0816762	12.1475	0.912311	0.0241667	0.0264984	0.441662	3.55378	4.97156	0.095552	98.8957	VG-568_1
99	18_12_19	76.7555	0.0670476	12.0391	1.29279	0.03	0.0174132	0.458843	3.44423	4.92149	0.0943576	99.0264	VG-568_2
100	18_12_19	76.8344	0.0902095	12.1526	1.18186	0	0.0158991	0.458843	3.47983	4.94953	0.101524	99.1631	VG-568_3
101	18_12_19	77.082	0.0743619	12.2861	1.22851	0.0175	0.0333123	0.460865	3.5839	4.91848	0.101524	99.6851	VG-568_4
102	18_12_19	76.9282	0.0633905	12.0632	1.05745	0.0141667	0.0166562	0.466929	3.56747	4.96555	0.10869	99.1431	VG-568_5
103	18_12_19	77.135	0.0828952	12.1706	1.13521	0.0358333	0	0.443683	3.52548	4.91247	0.0931632	99.4412	VG-568_6
104	18_12_19	76.7844	0.0646095	12.0622	1.06471	0.0383333	0.0401262	0.463897	3.43602	4.90046	0.107496	98.8548	VG-568_7
105	18_12_19	77.3087	0.0670476	12.3513	0.973477	0.0183333	0.0158991	0.433577	3.54647	4.85338	0.0871912	99.5683	VG-568_8
106	18_12_19	77.068	0.0841143	12.2911	0.965184	0	0.02347	0.43863	3.36573	4.94653	0.109885	99.1828	VG-568_9
107	18_12_19	77.107	0.0999619	12.1495	1.09685	0.0133333	0.0174132	0.432566	3.6478	4.77326	0.109885	99.3377	VG-568_10
108	18_12_19	77.3527	0.0646095	12.1696	1.00562	0	0.046183	0.454801	3.55378	4.85639	0.0943576	99.5037	VG-568_11
109	18_12_19	76.8394	0.0914286	12.1154	1.06575	0.00333333	0.0219558	0.45379	3.3712	4.95654	0.109885	98.9188	VG-568_12
110	18_12_19	77.0011	0.0792381	12.2279	1.0927	0.0491667	0.0249842	0.444694	3.5127	5.00762	0.117051	99.4401	VG-568_13
111	18_12_19	77.1599	0.0889905	12.2168	0.998359	0.0366667	0.134763	0.441662	3.53552	4.94352	0.0943576	99.5562	VG-568_14
112	18_12_19	76.4119	0.0768	12.1606	1.12069	0.0283333	0.0211987	0.452779	3.57295	4.9285	0.0931632	98.7738	VG-568_15
113	18_12_19	76.8553	0.103619	12.1164	1.08855	0.0108333	0.0242271	0.452779	3.62315	5.07472	0.102718	99.3496	VG-568_16
120	ref	76.96	0.08	12.17	1.08	0.02	0.03	0.45	3.52	4.93	0.1013		REF	reference values from Streck and Wacaster 2006
Omitted values
2	10_12_19	76.9004	0.0677778	12.1482	1.10654	0.0562222	0.0230424	0.487237	3.6019	4.45974	0.0808766	98.8511	VG-568_3	omitted - high K2O value
9	10_12_19	77.805	0.0633333	12.3066	1.1106	0.0268889	0.0370324	0.456593	2.711	4.81138	0.0999725	99.3285	VG-568_10	omitted - low Na2O value
44	13_12_19	70.7848	0.0802737	11.1459	1.00286	0.00554348	0.0433603	0.412711	3.10288	4.06143	0.212903	90.6398	VG-568_1	omitted - low Na2O value
	3.3. Secondary Standard - ATHOG																3.3. Element plots for secondary standard - ATHO-G - Orange line shows the reference data
plot #	No.	SiO2	TiO2	Al2O3	FeO	MnO	MgO	CaO	Na2O	K2O	Cl	Total	Comment
0	Reference	75.6	0.255	12.2	3.27	0.106	0.103	1.7	3.75	2.64	0.0243		REF	reference values from Jochum et al., 2006
1	10_12_19	75.7397	0.264444	12.2413	3.37046	0.088	0.100399	1.87234	3.84811	2.66399	0.0606575	100.189	ATHOG_1
2	10_12_19	75.7605	0.218889	12.3106	3.49759	0.105111	0.0954613	1.77121	3.75875	2.71832	0.0460547	100.236	ATHOG_2
3	10_12_19	75.892	0.282222	12.2452	3.35927	0.0721111	0.0929925	1.76406	3.901	2.73313	0.0527945	100.342	ATHOG_3
4	10_12_19	75.2652	0.265556	12.2264	3.19248	0.132	0.0773566	1.8182	3.68397	2.70745	0.0516712	99.3686	ATHOG_5
5	10_12_19	75.2711	0.253333	12.27	3.24841	0.118556	0.102868	1.67928	4.01133	2.77363	0.039315	99.7285	ATHOG_6
6	10_12_19	75.6577	0.26	12.2829	3.49759	0.103889	0.0929925	1.77326	3.77881	2.7924	0.047178	100.239	ATHOG_7
7	10_12_19	75.7743	0.251111	12.3205	3.4508	0.105111	0.086409	1.78143	3.65114	2.72227	0.0460547	100.143	ATHOG_8
8	10_12_19	75.7012	0.288889	12.3472	3.51691	0.140556	0.0822943	1.81309	3.69947	2.68572	0.0505479	100.275	ATHOG_9
9	10_12_19	75.545	0.268889	12.3591	3.42334	0.099	0.0839401	1.83659	3.70312	2.67387	0.0438082	99.9928	ATHOG_10
10	10_12_19	75.5885	0.277778	12.3363	3.43555	0.124667	0.0987531	1.83659	3.96301	2.77758	0.0516712	100.439	ATHOG_11
11	11_12_19	75.9793	0.285437	12.1697	3.27377	0.0810526	0.0999083	1.82989	3.53018	2.7128	0.040174	99.9621	ATHOG_1
12	11_12_19	76.0416	0.303203	12.3397	3.38423	0.0760902	0.112018	1.79164	3.6501	2.75272	0.0422884	100.451	ATHOG_2
13	11_12_19	76.2433	0.278331	12.3327	3.22489	0.0992481	0.100917	1.79784	3.67231	2.80961	0.034888	100.559	ATHOG_3
14	11_12_19	76.3668	0.287806	12.3347	3.27377	0.108346	0.115046	1.74718	3.6421	2.80662	0.0412312	100.682	ATHOG_4
15	11_12_19	76.4892	0.291359	12.4737	3.23858	0.0967669	0.119083	1.82265	3.52929	2.75072	0.0518033	100.811	ATHOG_5
16	11_12_19	76.2534	0.285437	12.4967	3.22685	0.0793985	0.103945	1.81955	3.49553	2.72777	0.0359452	100.489	ATHOG_6
17	11_12_19	76.1901	0.287806	12.4627	3.27768	0.0901504	0.120092	1.81645	3.54261	2.77967	0.0391168	100.567	ATHOG_7
18	11_12_19	76.3106	0.283069	12.4457	3.17699	0.0703008	0.105963	1.86297	3.72649	2.74474	0.0507461	100.727	ATHOG_8
19	11_12_19	76.437	0.272409	12.3267	3.20534	0.0818797	0.0908257	1.8516	3.59769	2.77268	0.0454601	100.636	ATHOG_9
20	11_12_19	76.6388	0.275962	12.4027	3.34024	0.0777444	0.104954	1.83402	3.80289	2.34351	0.0338307	100.821	ATHOG_10
21	11_12_19	75.9362	0.283069	12.3437	3.2376	0.0703008	0.108991	1.80301	3.49287	2.64593	0.034888	99.9217	ATHOG_11
22	11_12_19	75.9833	0.297281	12.2597	3.35197	0.0802256	0.106972	1.82782	3.64033	2.78167	0.040174	100.329	ATHOG_12
23	12_12_19	76.0158	0.27777	12.3897	3.32985	0.131325	0.0796537	1.83888	3.74325	2.70093	0.0392266	100.507	ATHOG_1
24	12_12_19	76.0688	0.245025	12.5493	3.23023	0.10241	0.0917749	1.84203	3.53224	2.72183	0.0455877	100.384	ATHOG_2
25	12_12_19	76.6274	0.274382	12.3379	3.08129	0.110843	0.0917749	1.87566	3.41077	2.59843	0.0307452	100.408	ATHOG_3
26	12_12_19	76.267	0.26422	12.3528	3.12191	0.104819	0.0519481	1.85674	3.62533	2.80543	0.0424071	100.45	ATHOG_4
27	12_12_19	76.2921	0.247283	12.2491	3.13449	0.122892	0.0787879	1.8725	3.43294	2.82633	0.0381664	100.256	ATHOG_5
28	12_12_19	76.3652	0.234862	12.3439	3.443	0.115663	0.101299	1.83888	3.63153	2.74671	0.0402868	100.821	ATHOG_6
29	12_12_19	76.4983	0.254058	12.4675	2.97878	0.0963855	0.0865801	1.80841	3.53844	2.76064	0.0371062	100.489	ATHOG_8
30	12_12_19	75.9237	0.282287	12.3229	3.32791	0.0987952	0.0796537	1.87881	3.56149	2.76064	0.0583098	100.236	ATHOG_9
31	12_12_19	76.229	0.265349	12.3997	3.33178	0.106024	0.0883117	1.87356	3.54465	2.76662	0.0349859	100.605	ATHOG_10
32	12_12_19	76.211	0.280028	12.4556	3.18381	0.2	0.0865801	1.83363	3.49766	2.75865	0.0318053	100.507	ATHOG_11
33	12_12_19	76.262	0.301482	12.3838	3.24764	0.124096	0.0900433	1.78319	3.63951	2.73377	0.0371062	100.566	ATHOG_12
34	12_12_19	76.0638	0.257445	12.3459	3.15866	0.168675	0.0744589	1.90193	3.4223	2.76861	0.0349859	100.162	ATHOG_13
35	12_12_19	76.3611	0.257445	12.3369	3.07936	0.16506	0.0935065	1.87986	3.66611	2.75368	0.0286248	100.593	ATHOG_14
36	12_12_19	75.8586	0.246154	12.4137	3.26408	0.127711	0.104762	1.88301	3.40102	2.79349	0.0402868	100.093	ATHOG_15
37	12_12_19	76.182	0.273253	12.4027	3.15093	0.0927711	0.0865801	1.8641	3.4684	2.76064	0.036046	100.281	ATHOG_16
38	12_12_19	76.3601	0.268737	12.4576	3.12965	0.166265	0.0813853	1.83047	3.64129	2.76463	0.0540691	100.7	ATHOG_17
39	12_12_19	76.0738	0.257445	12.294	3.13062	0.136145	0.0978355	1.8063	3.54021	2.67406	0.0413469	100.01	ATHOG_18
40	12_12_19	76.3892	0.276641	12.303	3.21476	0.16506	0.0796537	1.88616	3.53135	2.81837	0.0402868	100.664	ATHOG_19
41	12_12_19	76.3541	0.258574	12.4905	3.31631	0.126506	0.0961039	1.87461	3.61824	2.74771	0.0349859	100.883	ATHOG_20
42	13_12_19	76.091	0.251292	12.3598	3.08473	0.105326	0.104271	1.80958	3.30432	2.73209	0.0325122	99.8424	ATHOG_1
43	13_12_19	76.3304	0.287357	12.1702	3.17868	0.0720652	0.0629757	1.7256	3.38841	2.76733	0.0388049	99.983	ATHOG_2
44	13_12_19	76.5008	0.290847	12.4214	3.20835	0.131196	0.0949798	1.80958	3.47249	2.77419	0.0262195	100.704	ATHOG_3
45	13_12_19	76.4239	0.274559	12.3784	3.25484	0.0720652	0.0898178	1.76657	3.35329	2.80845	0.0283171	100.422	ATHOG_4
46	13_12_19	76.2102	0.279213	12.5025	3.2667	0.0877717	0.0939474	1.82699	3.25997	2.77712	0.0346098	100.304	ATHOG_5
47	13_12_19	76.3707	0.267579	12.3862	3.08868	0.0988587	0.109433	1.82289	3.43368	2.69196	0.0440488	100.27	ATHOG_6
48	13_12_19	76.3688	0.250128	12.3627	3.22319	0.140435	0.0949798	1.75428	3.25812	2.74384	0.0430001	100.196	ATHOG_7
49	13_12_19	76.5924	0.272233	12.351	3.46352	0.0461957	0.0784615	1.79627	3.45863	2.81628	0.0461464	100.875	ATHOG_8
50	13_12_19	76.29	0.275723	12.2943	3.26868	0.10625	0.0681377	1.77271	3.17219	2.84467	0.033561	100.093	ATHOG_9
51	13_12_19	76.9944	0.266416	12.4732	3.24297	0.0840761	0.0991093	1.79114	3.47065	2.81726	0.0377562	101.239	ATHOG_10
52	13_12_19	76.0742	0.267579	12.3989	3.15198	0.0896196	0.0980769	1.79217	3.38656	2.72818	0.0377562	99.9873	ATHOG_11
53	13_12_19	76.5904	0.262926	12.3187	3.4022	0.113641	0.06917	1.81163	3.24149	2.79964	0.0346098	100.61	ATHOG_12
54	13_12_19	76.4072	0.274559	12.4008	3.24198	0.0970109	0.108401	1.79729	3.49467	2.72426	0.0346098	100.546	ATHOG_13
55	13_12_19	76.2949	0.267579	12.436	3.09956	0.0877717	0.107368	1.73482	3.3958	2.83879	0.0398537	100.263	ATHOG_14
56	13_12_19	76.3294	0.251292	12.436	3.26077	0.115489	0.0949798	1.79319	3.66469	2.65868	0.0545367	100.604	ATHOG_15
57	13_12_19	76.3225	0.283867	12.305	3.13418	0.108098	0.0960121	1.83211	3.23502	2.77223	0.0461464	100.089	ATHOG_16
58	13_12_19	76.0082	0.29201	12.2894	3.18758	0.1275	0.092915	1.79729	3.46972	2.71545	0.0450976	99.9801	ATHOG_17
59	13_12_19	76.2427	0.283867	12.4145	3.34484	0.0545109	0.11666	1.75428	3.51408	2.8153	0.0304147	100.541	ATHOG_18
60	16_12_19	75.3881	0.300745	12.3237	3.4233	0.0501142	0.117818	1.79896	3.70162	2.72731	0.0390554	99.8316	ATHO-G_1
61	16_12_19	75.3311	0.265291	12.2733	3.13648	0.0495922	0.0894545	1.8125	3.55859	2.77699	0.0455647	99.2932	ATHO-G_2
62	16_12_19	75.4411	0.261624	12.2894	3.23046	0.0767374	0.0981818	1.8375	3.67808	2.75367	0.0368857	99.6667	ATHO-G_4
63	16_12_19	75.3541	0.271404	12.1987	3.38023	0.0636868	0.110182	1.75521	3.35581	2.77699	0.0314613	99.2662	ATHO-G_5
64	16_12_19	75.4511	0.29341	12.2582	3.29898	0.0438499	0.0818182	1.74063	3.56221	2.68168	0.0455647	99.4118	ATHO-G_6
65	16_12_19	75.6581	0.309303	12.4941	3.18347	0.0595106	0.096	1.83333	3.68713	2.705	0.0444798	100.026	ATHO-G_7
66	16_12_19	75.302	0.284852	12.3681	3.03075	0.0328874	0.130909	1.74792	3.63825	2.60361	0.0444798	99.1393	ATHO-G_8
67	16_12_19	75.4751	0.294632	12.2874	3.28332	0.045416	0.0763636	1.70417	3.71701	2.77496	0.0368857	99.6583	ATHO-G_9
68	16_12_19	75.068	0.262846	12.3066	3.28625	0.0730832	0.103636	1.775	3.74236	2.64316	0.0444798	99.2609	ATHO-G_10
69	16_12_19	75.177	0.284852	12.0878	3.1355	0.0412398	0.096	1.79688	3.61652	2.7344	0.050989	98.9702	ATHO-G_11
70	16_12_19	75.4151	0.260401	12.2864	3.1864	0.04646	0.110182	1.76354	3.83288	2.66343	0.0401403	99.5648	ATHO-G_12
71	16_12_19	75.3861	0.272627	12.1351	3.22654	0.0187928	0.104727	1.78021	3.38568	2.72731	0.0390554	99.0371	ATHO-G_13
72	16_12_19	75.3531	0.290965	12.2753	3.35086	0.0636868	0.105818	1.80625	3.63734	2.75874	0.0455647	99.642	ATHO-G_14
73	16_12_19	75.13	0.29341	12.3459	3.23633	0.0381077	0.0883636	1.85313	3.65907	2.69689	0.04231	99.3412	ATHO-G_15
74	16_12_19	74.92	0.273849	12.2632	3.26668	0.0589886	0.109091	1.76458	3.55406	2.6026	0.0564134	98.813	ATHO-G_16
75	17_12_19	75.867	0.272109	12.3171	3.33603	0.0924559	0.0956044	1.78558	3.43964	2.77592	0.0422083	99.9814	ATHO-G_1
76	17_12_19	75.7118	0.280574	12.2012	3.3083	0.0815409	0.0692308	1.79073	3.33425	2.74652	0.0443729	99.5241	ATHO-G_2
77	17_12_19	75.4985	0.274528	12.2536	3.16368	0.0629213	0.0824176	1.75673	3.42783	2.69887	0.0443729	99.219	ATHO-G_3
78	17_12_19	75.1269	0.270899	12.2405	3.19835	0.0918138	0.0766484	1.72169	3.39694	2.72422	0.0432906	98.848	ATHO-G_5
79	17_12_19	75.5425	0.274528	12.1599	3.28749	0.0879615	0.0824176	1.77836	3.17708	2.7009	0.0411261	99.0912	ATHO-G_7
80	17_12_19	75.218	0.28904	12.2778	3.43112	0.0391653	0.0774725	1.7897	3.21978	2.59647	0.0411261	98.9386	ATHO-G_8
81	17_12_19	75.5215	0.281784	12.4077	3.27165	0.0558587	0.0700549	1.75982	3.41511	2.79012	0.0400438	99.5736	ATHO-G_9
82	17_12_19	75.4804	0.28904	12.3624	3.30037	0.0731942	0.0906593	1.78248	3.17526	2.76071	0.0400438	99.3145	ATHO-G_10
83	17_12_19	75.5285	0.280574	12.2768	3.39348	0.0988764	0.0601648	1.76085	3.24068	2.65021	0.0292212	99.2901	ATHO-G_11
84	17_12_19	75.1559	0.279365	12.2375	3.29542	0.0507223	0.0782967	1.76291	3.37059	2.72726	0.0476197	98.958	ATHO-G_12
85	17_12_19	75.4073	0.301134	12.2486	3.25481	0.0308186	0.093956	1.79382	3.20706	2.79924	0.0497842	99.1367	ATHO-G_13
86	17_12_19	75.6857	0.314437	12.2123	3.14189	0.0744783	0.0923077	1.76085	3.43328	2.61066	0.0422083	99.3259	ATHO-G_14
87	17_12_19	75.4584	0.280574	12.2687	3.21519	0.0866774	0.0824176	1.67636	3.28792	2.74348	0.0411261	99.0997	ATHO-G_15
88	17_12_19	75.6937	0.249131	12.176	3.17755	0.0622793	0.0791209	1.78248	3.53049	2.70597	0.036797	99.4568	ATHO-G_16
89	17_12_19	75.6707	0.290249	12.2627	3.34296	0.0622793	0.0741758	1.80309	3.31608	2.68873	0.0303034	99.511	ATHO-G_17
90	17_12_19	75.4704	0.274528	12.1227	3.11217	0.059069	0.0807692	1.80927	3.45872	2.69481	0.0443729	99.0824	ATHO-G_19
91	17_12_19	75.7158	0.249131	12.2002	3.13298	0.0776886	0.0651099	1.80721	3.3715	2.74855	0.0465374	99.3682	ATHO-G_20
92	18_12_19	75.642	0.29379	12.1646	3.30194	0.0916667	0.0643533	1.75755	2.68838	2.59294	0.0382208	98.5972	ATHO-G_1
93	18_12_19	75.2934	0.298667	12.1395	3.38073	0.100833	0.0741956	1.75048	2.69203	2.76421	0.0382208	98.4941	ATHO-G_2
94	18_12_19	75.7778	0.264533	12.1134	3.2667	0.0775	0.0590536	1.73127	2.78423	2.6971	0.0286656	98.7716	ATHO-G_3
95	18_12_19	75.6889	0.265752	12.1797	3.3092	0.1325	0.0855521	1.75149	2.77876	2.71213	0.05972	98.9039	ATHO-G_4
96	18_12_19	75.7688	0.282819	12.2409	3.49892	0.075	0.0635962	1.72521	2.39079	2.72615	0.0465816	98.7722	ATHO-G_5
97	18_12_19	75.9585	0.284038	12.1807	3.52691	0.0583333	0.0711672	1.75048	2.66921	2.55589	0.0549424	99.0552	ATHO-G_6
98	18_12_19	75.9825	0.274286	12.0612	3.40147	0.0908333	0.0893375	1.71207	2.60805	2.64102	0.0513592	98.8608	ATHO-G_8
99	18_12_19	75.3693	0.312076	12.3102	3.40769	0.104167	0.069653	1.75654	2.53502	2.50581	0.0501648	98.3705	ATHO-G_9
100	18_12_19	75.5461	0.284038	12.2028	3.47093	0.0575	0.0802524	1.75553	2.61809	2.67207	0.0286656	98.6873	ATHO-G_10
101	18_12_19	76.0294	0.251124	12.1616	3.40354	0.0408333	0.0635962	1.76159	2.70299	2.70311	0.0525536	99.1178	ATHO-G_11
102	18_12_19	75.9066	0.26941	12.2359	3.41806	0.0833333	0.0643533	1.74542	2.76232	2.70111	0.0525536	99.1865	ATHO-G_12
103	18_12_19	75.6539	0.297448	12.2028	3.15991	0.1075	0.0832808	1.64537	3.32282	2.76821	0.0501648	99.2413	ATHO-G_13
104	18_12_19	75.5701	0.29379	12.1345	3.5746	0.0725	0.0825237	1.73431	3.1932	2.70011	0.0561368	99.3556	ATHO-G_14
105	18_12_19	76.0005	0.285257	12.4277	3.41598	0.1025	0.077224	1.66457	3.40133	2.71613	0.0453872	100.091	ATHO-G_15
106	18_12_19	75.7308	0.274286	12.3262	3.33823	0.0866667	0.0764669	1.73127	3.17037	2.7632	0.0513592	99.4976	ATHO-G_16
107	ref	75.6	0.255	12.2	3.27	0.106	0.103	1.7	3.75	2.64	0.0243		REF	reference values from Jochum et al., 2006
Omitted values
19	12_12_19	76.18	0.257445	12.3409	3.40915	0.0614458	0.0909091	1.84834	4.34969	2.78055	0.0339257	101.318	ATHOG_7	omitted - elevated Na2O value
53	16_12_19	75.136	0.311748	12.2148	3.27255	0.0788254	0.116727	1.79583	4.6621	2.70297	0.04231	100.292	ATHO-G_3	omitted - elevated Na2O value
70	17_12_19	76.4349	0.284203	12.3261	3.21618	0.0500803	0.0758242	1.80412	0.941223	2.73841	0.0422083	97.871	ATHO-G_4	omitted - low Na2O value
72	17_12_19	75.9021	0.293878	12.2345	3.29047	0.0686998	0.089011	1.79691	1.03117	2.6938	0.0606068	97.4005	ATHO-G_6	omitted - low Na2O value
84	17_12_19	75.9551	0.293878	12.0965	3.4331	0.0603531	0.0832418	1.82061	0.83856	2.65426	0.0519487	97.2356	ATHO-G_18	omitted - low Na2O value
93	18_12_19	76.4808	0.303543	12.2258	3.45227	0.0991667	0.0757098	1.76564	0.941162	2.64202	0.0453872	97.9862	ATHO-G_7	omitted - low Na2O value
	3.4. Secondary Standard - A99																3.4. Element plots for secondary standard - A99 - Orange line shows the reference data
plot #	No.	SiO2	TiO2	Al2O3	FeO	MnO	MgO	CaO	Na2O	K2O	Cl	Total	Comment
0	Reference	50.82	4.05	12.49	13.29	0.17	5.04	9.39	2.61	0.816	0.0205	99.04	REF	reference values from Streck and Wacaster 2006
1	10_12_19	50.7031	4.55556	12.4244	13.7473	0.232222	4.26449	9.57109	2.69368	0.830706	0.0303287	99.0225	VG-A99_1
2	10_12_19	50.3788	4.57778	12.2056	13.7391	0.262778	4.3616	9.52819	2.77939	0.807	0.0381917	98.6403	VG-A99_2
3	10_12_19	50.6616	4.54444	12.2621	13.9792	0.278667	4.29741	9.50572	2.65264	0.895898	0.0303287	99.0776	VG-A99_3
4	10_12_19	50.4806	4.52667	12.366	13.7178	0.249333	4.2719	9.50367	2.65538	0.838608	0.0280822	98.61	VG-A99_4
5	10_12_19	50.5884	4.45222	12.3641	13.3944	0.290889	4.36983	9.58845	2.52407	0.819841	0.0404383	98.3921	VG-A99_5
6	10_12_19	50.5726	4.5	12.3047	13.8642	0.232222	4.28671	9.41583	2.8414	0.885033	0.0123561	98.9027	VG-A99_6
7	10_12_19	50.6774	4.38556	12.2848	14.1307	0.180889	4.37723	9.63748	2.60431	0.862314	0.0134794	99.1407	VG-A99_7
8	10_12_19	50.5498	4.45444	12.1829	13.8988	0.257889	4.30481	9.519	2.69276	0.889972	0.0190959	98.7504	VG-A99_8
9	10_12_19	50.7673	4.52444	12.2136	13.6913	0.216333	4.30399	9.51593	2.5341	0.850461	0.0336986	98.6175	VG-A99_9
10	10_12_19	50.537	4.50556	12.3591	13.8866	0.202889	4.29165	9.50674	2.46115	0.897874	0.0280822	98.6486	VG-A99_10
11	10_12_19	50.6576	4.52667	12.2621	13.1747	0.254222	4.25791	9.56803	2.50674	0.851449	0.0292054	98.0594	VG-A99_11
12	10_12_19	50.7723	4.57556	12.2561	13.4025	0.210222	4.27848	9.47507	2.48942	0.813914	0.0247123	98.2736	VG-A99_12
13	11_12_19	51.0781	4.82046	12.3637	13.1762	0.164586	5.26587	9.65291	2.43843	0.846377	0.0137437	99.8067	VG-A99_1
14	11_12_19	51.0621	4.83704	12.1857	13.0247	0.148045	5.27394	9.68806	2.54858	0.894285	0.0105721	99.6625	VG-A99_2
15	11_12_19	51.1323	4.8169	12.4727	13.0658	0.123233	5.25578	9.65291	2.54414	0.828411	0.0253731	99.8922	VG-A99_3
16	11_12_19	51.3652	4.90218	12.4577	13.402	0.168722	5.39202	9.71494	2.4944	0.822423	0.020087	100.72	VG-A99_4
17	11_12_19	51.0922	4.74821	12.3697	13.3307	0.159624	5.27495	9.66532	2.62143	0.841386	0.0179726	100.104	VG-A99_5
18	11_12_19	51.2839	4.86546	12.5397	13.3707	0.189398	5.25578	9.64774	2.55924	0.866339	0.0211442	100.578	VG-A99_6
19	11_12_19	50.8955	4.74466	12.4967	13.3903	0.176992	4.95606	9.63534	2.53171	0.836396	0.0232586	99.6636	VG-A99_7
20	11_12_19	51.2147	4.74466	12.4947	13.1713	0.162105	5.17404	9.53092	2.47485	0.846377	0.0158582	99.8137	VG-A99_8
21	11_12_19	51.3421	4.75769	12.4737	13.3747	0.188571	5.33046	9.67669	2.6081	0.837394	0.0296019	100.589	VG-A99_9
22	11_12_19	51.318	4.84296	12.4367	12.4753	0.144737	5.3022	9.61983	2.50328	0.835398	0.0169154	99.4785	VG-A99_10
23	11_12_19	51.0229	4.779	12.4277	13.1097	0.162932	5.36679	9.74699	2.52815	0.849371	0.0169154	99.9936	VG-A99_11
24	11_12_19	51.0922	4.85362	12.5527	12.9377	0.163759	5.31229	9.71494	2.61876	0.859352	0.0158582	100.105	VG-A99_12
25	12_12_19	50.9715	4.48384	12.3967	12.9238	0.215663	4.471	9.8627	2.54456	0.815057	0.0201434	98.6849	VG-A99_1
26	12_12_19	50.9935	4.53013	12.4496	13.0795	0.275904	4.48571	9.76077	2.64474	0.879744	0.0159027	99.0997	VG-A99_2
27	12_12_19	51.1887	4.58546	12.6471	13.4316	0.244578	4.54545	9.82907	2.59243	0.848893	0.0222637	99.9133	VG-A99_3
28	12_12_19	50.9925	4.61369	12.4386	13.1801	0.210843	4.47532	9.81751	2.49047	0.847898	0.0148425	99.067	VG-A99_4
29	12_12_19	51.0626	4.59675	12.4436	13.3097	0.227711	4.52035	9.81961	2.53126	0.826004	0.00742125	99.3376	VG-A99_5
30	12_12_19	51.0826	4.59675	12.3768	13.3852	0.292771	4.51602	9.83012	2.57913	0.861831	0.0201434	99.5212	VG-A99_6
31	12_12_19	50.8714	4.53465	12.4715	13.3078	0.283133	4.57143	9.85534	2.49136	0.842922	0.0286248	99.2296	VG-A99_7
32	12_12_19	51.4821	4.64644	12.4257	13.2846	0.218072	4.5368	9.85114	2.67311	0.871783	0.0212036	99.9896	VG-A99_8
33	12_12_19	51.0176	4.56514	12.5134	12.8706	0.236145	4.56883	9.83538	2.66868	0.876758	0.0233239	99.1526	VG-A99_9
34	12_12_19	50.9805	4.53578	12.4925	13.0002	0.26506	4.59654	9.86585	2.39649	0.82899	0.0318053	98.9619	VG-A99_10
35	12_12_19	50.8133	4.68257	12.3608	13.2246	0.245783	4.56277	9.74501	2.57381	0.833966	0.0254443	99.0427	VG-A99_11
36	12_12_19	51.1557	4.61256	12.5104	12.9722	0.26747	4.66234	9.85429	2.51264	0.864816	0.029685	99.4124	VG-A99_12
37	12_12_19	50.9775	4.61934	12.4376	13.2536	0.253012	4.50303	9.84063	2.55608	0.898653	0.018023	99.3395	VG-A99_13
38	12_12_19	50.9645	4.5403	12.4356	12.6995	0.227711	4.49351	9.93835	2.59066	0.885715	0.029685	98.7758	VG-A99_14
39	12_12_19	51.0095	4.67241	12.4945	13.4345	0.248193	4.50909	9.91103	2.47895	0.819038	0.0212036	99.5772	VG-A99_15
40	12_12_19	50.8514	4.57756	12.3658	12.3581	0.240964	4.60433	9.88371	2.64652	0.88671	0.0137823	98.415	VG-A99_16
41	12_12_19	51.2318	4.62498	12.5055	12.8387	0.331325	4.5619	9.75131	2.588	0.865811	0.0095416	99.2993	VG-A99_17
42	12_12_19	50.5681	4.64418	12.2631	13.2014	0.274699	4.50736	9.53905	2.51973	0.88472	0.0127221	98.4023	VG-A99_18
43	12_12_19	50.9234	4.58546	12.3299	13.2372	0.224096	4.39481	9.93625	2.51973	0.917561	0.0201434	99.0684	VG-A99_19
44	12_12_19	50.7943	4.50303	12.4825	13.4093	0.262651	4.41645	9.83433	2.47097	0.815057	0.0349859	98.9886	VG-A99_20
45	13_12_19	50.8528	4.68729	12.4458	12.7909	0.176467	5.23111	9.41452	2.63995	0.896667	0.0262195	99.1354	VG-A99_1
46	13_12_19	50.9266	4.77803	12.2835	13.3942	0.194946	5.25899	9.52717	2.40986	0.905477	0.0220244	99.6788	VG-A99_2
47	13_12_19	50.902	4.73964	12.5064	13.233	0.154293	5.06283	9.40428	2.72126	0.880026	0.0304147	99.6037	VG-A99_3
48	13_12_19	51.1956	4.61283	12.5171	12.7602	0.196793	5.22182	9.54663	2.46715	0.899604	0.0220244	99.4178	VG-A99_4
49	13_12_19	50.9759	4.75244	12.3559	13.1014	0.158913	5.19911	9.45958	2.56325	0.861427	0.0283171	99.4279	VG-A99_5
50	13_12_19	51.0429	4.62098	12.4086	12.9926	0.190326	5.2435	9.40018	2.59374	0.84087	0.0136342	99.3338	VG-A99_6
51	13_12_19	50.8931	4.71754	12.4106	13.2597	0.182935	5.18053	9.47699	2.53923	0.888836	0.0262195	99.5495	VG-A99_7
52	13_12_19	51.1562	4.64773	12.4966	13.2023	0.19125	5.12065	9.42066	2.68984	0.80563	0.0209756	99.7309	VG-A99_8
53	13_12_19	51.3325	4.73964	12.2572	12.8571	0.188478	5.25383	9.48518	2.66027	0.868279	0.0251708	99.6425	VG-A99_9
54	13_12_19	50.8872	4.72452	12.3969	13.2705	0.128424	5.25899	9.58452	2.57064	0.901562	0.0125854	99.7234	VG-A99_10
55	13_12_19	51.2251	4.67216	12.5132	13.3121	0.182935	5.16504	9.45343	2.58543	0.859469	0.0199269	99.9689	VG-A99_11
56	13_12_19	51.0577	4.63261	12.4605	13.0747	0.216196	5.11755	9.42373	2.59467	0.866322	0.0209756	99.4439	VG-A99_12
57	13_12_19	50.7266	4.62796	12.3178	13.1707	0.193098	4.99573	9.51283	2.4653	0.881005	0.0188781	98.891	VG-A99_13
58	13_12_19	51.1562	4.69194	12.4057	13.4476	0.182935	5.10826	9.53741	2.43296	0.875132	0.0104878	99.8381	VG-A99_14
59	13_12_19	50.9769	4.72801	12.4086	13.2043	0.204185	5.23524	9.53127	2.58266	0.874153	0.0220244	99.7453	VG-A99_15
60	13_12_19	51.0045	4.71521	12.4174	13.6563	0.160761	5.21356	9.42169	2.45699	0.820313	0.0220244	99.8667	VG-A99_16
61	13_12_19	51.0636	4.74546	12.2923	13.046	0.158913	5.21666	9.54355	2.56972	0.824229	0.0262195	99.4605	VG-A99_17
62	13_12_19	51.3631	4.70939	12.3363	12.9926	0.166304	5.21356	9.56711	2.50596	0.859469	0.0199269	99.7138	VG-A99_18
63	16_12_19	50.3851	4.9733	12.2319	13.1176	0.115889	5.47855	9.61042	2.51844	0.811095	0.0292916	99.2423	VG-A99_1
64	16_12_19	50.5081	4.9684	12.3187	12.772	0.141468	5.46764	9.68021	2.56008	0.803998	0.0227823	99.2206	VG-A99_2
65	16_12_19	50.5811	4.9464	12.1926	12.8964	0.104405	5.53745	9.73646	2.61078	0.874969	0.0249521	99.4806	VG-A99_3
66	16_12_19	50.6951	4.89261	12.4427	13.4152	0.127896	5.66727	9.69896	2.48766	0.847594	0.0206126	100.275	VG-A99_4
67	16_12_19	50.6951	4.89016	12.3429	13.2155	0.125285	5.60509	9.70625	2.54831	0.840497	0.00650924	99.9691	VG-A99_5
68	16_12_19	50.9772	4.92073	12.2279	12.6898	0.109625	5.69345	9.56875	2.51844	0.821234	0.0238672	99.5271	VG-A99_6
69	16_12_19	50.5361	4.88649	12.3197	13.2008	0.109103	5.74691	9.65938	2.44874	0.841511	0.0227823	99.7487	VG-A99_7
70	16_12_19	50.4571	4.91217	12.4165	12.7016	0.068385	5.62255	9.66042	2.49219	0.86483	0.0260369	99.1956	VG-A99_8
71	16_12_19	50.5121	4.83515	12.3398	13.1763	0.0939641	5.48945	9.53646	2.53202	0.842525	0.0151882	99.3578	VG-A99_9
72	16_12_19	50.6311	4.83882	12.3126	13.0716	0.103883	5.60509	9.61458	2.43787	0.86483	0.0249521	99.4804	VG-A99_10
73	16_12_19	50.4241	4.708	12.3005	13.3085	0.118499	5.49382	9.71979	2.39261	0.880038	0.0282067	99.3458	VG-A99_11
74	16_12_19	50.6601	4.89628	12.2501	13.5973	0.0751713	5.496	9.66979	2.65332	0.904371	0.0401403	100.202	VG-A99_12
75	16_12_19	50.3341	4.86693	12.3681	13.2175	0.103361	5.56364	9.62917	2.50305	0.870913	0.0162731	99.4566	VG-A99_13
76	16_12_19	50.6931	4.88772	12.3913	13.241	0.0976183	5.61055	9.48333	2.52749	0.885107	0.0141033	99.8171	VG-A99_14
77	16_12_19	50.5491	4.92806	12.4679	13.1597	0.0934421	5.53964	9.68229	2.60625	0.847594	0.0325462	99.874	VG-A99_15
78	16_12_19	50.8021	4.93295	12.1523	13.1519	0.0788254	5.58	9.67917	2.75833	0.868885	0.0184428	100.004	VG-A99_16
79	17_12_19	51.0157	4.9548	12.3382	12.9865	0.111717	4.14231	9.47293	2.67921	0.890161	0.020563	98.5915	VG-A99_1
80	17_12_19	50.8144	4.91731	12.5185	13.5115	0.11236	4.20659	9.58935	2.48388	0.833385	0.0238098	98.9873	VG-A99_2
81	17_12_19	50.8594	4.78186	12.3442	13.0381	0.129695	4.19176	9.53475	2.66286	0.886105	0.0238098	98.4288	VG-A99_3
82	17_12_19	50.9786	4.8641	12.3765	12.8172	0.0815409	4.18187	9.52444	2.51841	0.86887	0.0259744	98.2115	VG-A99_4
83	17_12_19	50.596	4.93182	12.2868	12.8865	0.154735	4.18764	9.59966	2.55566	0.865828	0.020563	98.0647	VG-A99_5
84	17_12_19	50.7413	4.89917	12.4027	13.6155	0.0969502	4.21401	9.52547	2.58019	0.831357	0.0238098	98.9066	VG-A99_6
85	17_12_19	50.6401	4.92819	12.1982	12.9687	0.169502	4.08626	9.62748	2.51659	0.839468	0.0227276	97.9745	VG-A99_7
86	17_12_19	50.575	4.84596	12.1347	13.5046	0.14061	4.21648	9.5028	2.63106	0.874953	0.0292212	98.4262	VG-A99_8
87	17_12_19	50.7983	4.74921	12.3634	13.5908	0.130979	4.36896	9.49868	2.58836	0.854676	0.016234	98.9433	VG-A99_9
88	17_12_19	50.6211	4.91489	12.3493	13.3877	0.134189	4.31786	9.4111	2.39303	0.890161	0.0227276	98.4193	VG-A99_10
89	17_12_19	50.7783	4.76977	12.2778	13.0569	0.14703	4.29148	9.48529	2.61834	0.844537	0.0238098	98.2694	VG-A99_11
90	17_12_19	50.3427	4.90763	12.3543	13.3818	0.117496	4.2206	9.56359	2.4003	0.860759	0.0270566	98.1491	VG-A99_12
91	17_12_19	50.4538	4.84112	12.3604	12.9548	0.131621	4.23791	9.57081	2.65741	0.807025	0.0183985	98.0149	VG-A99_13
92	17_12_19	50.3987	4.91852	12.3513	12.835	0.0494382	4.1761	9.62026	2.66104	0.844537	0.0227276	97.8549	VG-A99_14
93	17_12_19	50.7433	4.93787	12.3171	12.8915	0.11878	4.32363	9.58523	2.50478	0.81615	0.0248921	98.2382	VG-A99_15
94	17_12_19	50.7833	4.87135	12.4842	13.2946	0.129695	4.35989	9.4925	2.31217	0.83744	0.0270566	98.5652	VG-A99_16
95	17_12_19	50.6141	4.79274	12.1619	13.1866	0.139968	4.18352	9.49868	2.68103	0.857717	0.0173162	98.1163	VG-A99_17
96	17_12_19	50.5379	4.83507	12.3996	13.5165	0.0956661	4.27418	9.61923	2.54748	0.858731	0.0119049	98.6844	VG-A99_18
97	17_12_19	50.7082	4.82177	12.3503	13.1193	0.132905	4.23956	9.33383	2.60381	0.85569	0.0119049	98.1653	VG-A99_19
98	17_12_19	50.7182	4.81209	12.305	13.569	0.111717	4.24451	9.50487	2.42029	0.872925	0.0259744	98.5585	VG-A99_20
99	18_12_19	50.4869	4.96396	12.3915	13.9822	0.14	3.8824	9.43257	2.51585	0.824254	0.0322488	98.6196	VG-A99_1
100	18_12_19	50.2952	4.9152	12.2499	13.8723	0.179167	3.8877	9.36687	2.64183	0.787198	0.0155272	98.1954	VG-A99_2
101	18_12_19	50.8404	4.95055	12.2981	14.4093	0.115833	3.90662	9.35879	2.59527	0.871326	0.023888	99.3463	VG-A99_3
102	18_12_19	50.38	4.87131	12.2891	13.6142	0.158333	3.96038	9.37193	2.56971	0.816242	0.0334432	98.0312	VG-A99_4
103	18_12_19	50.7156	4.99931	12.4397	13.9998	0.174167	3.80517	9.5023	2.55602	0.884345	0.0250824	99.0764	VG-A99_5
104	18_12_19	50.5838	4.90423	12.5612	13.864	0.155	3.91495	9.36283	2.46473	0.890354	0.0226936	98.7011	VG-A99_6
105	18_12_19	50.6547	4.99322	12.3473	13.413	0.178333	3.91268	9.45177	2.66647	0.843283	0.023888	98.4608	VG-A99_7
106	18_12_19	50.8884	4.90667	12.3483	13.1217	0.143333	3.86347	9.35171	2.5405	0.898367	0.0191104	98.0625	VG-A99_8
107	18_12_19	50.6487	4.97493	12.3443	13.9656	0.134167	4.00202	9.41943	2.63361	0.858306	0.023888	98.9811	VG-A99_9
108	18_12_19	50.5468	4.90179	12.3483	13.9159	0.159167	3.87256	9.41538	2.73402	0.812236	0.0203048	98.7062	VG-A99_10
109	18_12_19	50.9033	4.96152	12.2781	13.9552	0.149167	3.99596	9.44065	2.47477	0.850294	0.0334432	99.009	VG-A99_11
110	18_12_19	50.5658	4.94324	12.276	13.0937	0.18	3.91874	9.36889	2.68017	0.868321	0.023888	97.8949	VG-A99_12
111	18_12_19	50.4969	4.91764	12.276	14.0558	0.165833	3.86347	9.45682	2.52224	0.867319	0.0155272	98.6221	VG-A99_13
112	18_12_19	51.0172	4.97493	12.2821	14.4228	0.1475	3.93539	9.47704	2.44282	0.864315	0.0262768	99.5641	VG-A99_14
113	18_12_19	50.7326	4.90057	12.3754	14.5825	0.215	3.81804	9.4164	2.53959	0.868321	0.0191104	99.4484	VG-A99_15
114	18_12_19	50.7595	4.89448	12.2299	13.8899	0.141667	3.89224	9.47906	2.39444	0.82826	0.0191104	98.5095	VG-A99_16
115	Reference	50.82	4.05	12.49	13.29	0.17	5.04	9.39	2.61	0.816	0.0205	99.04	REF	reference values from Streck and Wacaster 2006

## Sheet: SM Table 4 - Trace stds
SM Table 4. Trace element standard analyses
4.1. Secondary standard (STHS6/80-G) overview for trace element analysis
Element	Sc (ppm)	Ti (ppm)	V (ppm)	Cr (ppm)	Co (ppm)	Ni (ppm)	Cu (ppm)	Zn (ppm)	Ga (ppm)	Rb (ppm)	Sr86 (ppm)	Sr88 (ppm)	Y (ppm)	Zr90 (ppm)	Zr91 (ppm)	Nb (ppm)	Mo95 (ppm)	Mo98 (ppm)	Cs (ppm)	Ba137 (ppm)	Ba138 (ppm)	La (ppm)	Ce (ppm)	Pr (ppm)	Nd (ppm)	Sm (ppm)	Eu151 (ppm)	Eu153 (ppm)	Gd (ppm)	Tb (ppm)	Dy (ppm)	Ho (ppm)	Er (ppm)	Tm (ppm)	Yb (ppm)	Lu (ppm)	Hf (ppm)	Ta (ppm)	W (ppm)	Pb (ppm)	Th (ppm)	U (ppm)
Reference Value*	11.5	4214	90.3	16.9	13.2	23.7	41.5	67	20.9	30.7	482	482	11.4	118	118	6.94	2	2	1.75	298	298	12	26.1	3.2	13	2.78	0.953	0.953	2.59	0.371	2.22	0.42	1.18	0.172	1.13	0.168	3.07	0.42	0.47	10.3	2.28	1.01
Average	6.36449	4245.33	99.26	19.4623	21.4932	43.167	37.046	63.0027	21.4535	31.0527	484.817	484.375	11.4748	118.669	119.136	6.92681	2.60032	2.58935	2.07713	304.097	303.529	11.9231	25.3702	3.05998	12.8167	2.75692	0.969481	0.964995	2.62232	0.370308	2.14141	0.422978	1.18503	0.166254	1.13726	0.167303	3.04341	0.425557	0.717616	10.9872	2.26773	1.04324
2*Stdev (ppm)	1.51245	480.82	12.2804	17.8231	1.75112	7.64251	6.30554	7.39352	2.84118	3.56381	74.7258	50.5837	0.740306	10.1863	14.7758	0.828802	0.910955	0.414134	0.40192	33.1382	39.6016	0.950514	1.73169	0.428751	1.55787	0.516707	0.152969	0.16526	0.510637	0.0763051	0.364794	0.0674089	0.222063	0.0415475	0.276017	0.0416092	0.389731	0.0827581	0.219632	1.49208	0.204761	0.194417
Offset (ppm)	5.13551	31.3297	8.96	2.5623	8.29324	19.467	4.454	3.9973	0.553459	0.352703	2.81676	2.37459	0.0748108	0.668649	1.13568	0.0131892	0.600324	0.589351	0.32713	6.09676	5.52865	0.0769189	0.729784	0.140016	0.183297	0.0230811	0.0164811	0.0119946	0.0323243	0.000691892	0.0785946	0.00297838	0.00503243	0.00574595	0.00726486	0.000697297	0.0265946	0.00555676	0.247616	0.687243	0.0122703	0.0332378
* for STHS6/80_G from MPI-DING; Jochum et al., 2006 - Ti (ppm) converted from TiO2 (wt.%)
4.2. Primary Standard - ATHOG
Element	Sc (ppm)	Ti (ppm)	V (ppm)**	Cr (ppm)**	Co (ppm)**	Ni (ppm)	Cu (ppm)	Zn (ppm)	Ga (ppm)	Rb (ppm)	Sr86 (ppm)	Sr88 (ppm)	Y (ppm)	Zr90 (ppm)	Zr91 (ppm)	Nb (ppm)	Mo95 (ppm)	Mo98 (ppm)	Cs (ppm)	Ba137 (ppm)	Ba138 (ppm)	La (ppm)	Ce (ppm)	Pr (ppm)	Nd (ppm)	Sm (ppm)	Eu151 (ppm)	Eu153 (ppm)	Gd (ppm)	Tb (ppm)	Dy (ppm)	Ho (ppm)	Er (ppm)	Tm (ppm)	Yb (ppm)	Lu (ppm)	Hf (ppm)	Ta (ppm)	W (ppm)	Pb (ppm)	Th (ppm)	U (ppm)
28_01_2020_run#1	5.23	1522	4.12	Below LOD	2.09	12.9	18.82	142.5	25.1	66.3	93.5	91.5	93.7	509	509	62.8	4.68	4.81	1.27	543	536	54.8	121.1	14.52	61.3	13.54	2.68	2.75	15	2.54	16.15	3.43	10.13	1.46	10.58	1.57	13.7	3.88	9.4	5.66	7.05	2.59
28_01_2020_run#1	5.08	1547	3.91	Below LOD	2.14	13.5	18.2	138.7	25.8	65.3	95.2	93.7	93.5	512.3	515	62.2	5.03	4.85	1.06	557	545	55.7	120.9	14.71	60.5	14.3	2.87	2.68	15.34	2.39	16.26	3.44	9.99	1.549	10.45	1.51	13.11	3.83	9.66	5.68	7.3	2.31
28_01_2020_run#1	5	1547	4.27	Below LOD	2.31	14.1	18.9	148.5	26	66.3	93.4	96.8	97.4	522	517	65.1	4.8	4.96	1.07	554	554	56.7	121.3	14.88	62	14.62	2.78	2.82	15.1	2.71	15.57	3.29	10.98	1.55	10.4	1.59	13.73	4.1	9.8	5.69	7.57	2.43
28_01_2020_run#1	4.79	1514	3.68	Below LOD	2.04	12.3	18.3	137.5	24.1	62.7	94.2	91	93.6	497	498	60.4	4.73	4.68	0.8	524	538	55	120.6	14.46	59	13.9	2.76	2.83	15.8	2.45	15.99	3.34	9.86	1.5	10.54	1.45	13.89	3.81	8.93	5.62	7.66	2.31
28_01_2020_run#1	5.05	1534	4.04	Below LOD	2.2	13.2	18.71	132.8	26.1	67.3	96.2	94.3	94	520	518	64.4	4.76	4.21	1.11	568	560	56.2	121.5	14.86	61.7	14.1	2.84	2.83	15.9	2.62	16.83	3.72	11	1.56	10.8	1.47	13.68	3.88	9.5	5.78	7.57	2.29
28_01_2020_run#1	5.07	1516	3.73	Below LOD	2.11	11.4	18.42	140.7	24.6	64.2	93	91.5	92.9	501	511	60.5	5.02	4.92	1.18	537	532	54.5	120.2	14.44	59.5	14.5	2.64	2.58	15.1	2.4	15.69	3.27	9.99	1.44	10.36	1.57	14	3.86	9.24	5.55	7.23	2.41
28_01_2020_run#1	5.06	1533	3.95	Below LOD	2.25	12.4	18.8	140.2	26.4	68.8	94.2	96.3	96.7	515	504	64.5	4.62	4.88	1.37	560	557	56.8	120.7	14.51	61.2	14.9	2.79	2.72	15.2	2.55	17.4	3.59	10.7	1.56	10.5	1.61	14	4.04	9.9	5.74	7.76	2.43
28_01_2020_run#1	4.88	1549	4.02	Below LOD	2.18	13.6	18.7	143.7	25.8	66.2	94.5	94.8	95.9	517	525	63.6	4.73	4.95	1.34	574	566	56.9	120.9	14.78	63.1	14.9	2.81	2.92	16.4	2.73	17.1	3.35	10.45	1.56	10.4	1.6	14.7	3.94	9.2	5.73	7.49	2.45
28_01_2020_run#1	5.03	1506	3.78	7.9	2.06	13.2	18.5	143.3	25.2	64	93.9	93.1	94.5	515	512	61.4	4.9	4.92	0.9	532	542	54.9	121.1	14.56	59.9	13.4	2.8	2.86	14.8	2.54	15.8	3.48	10.34	1.49	10.52	1.45	13.29	3.85	9.11	5.6	7.19	2.33
28_01_2020_run#1	4.99	1528	3.95	Below LOD	1.87	13.2	18.35	137.4	25.1	64.9	93.6	92.8	91.8	502	501	61.7	4.65	5.08	0.99	532	529	53.2	120.7	14.6	58.2	13.4	3.02	2.66	14.9	2.43	15.09	3.29	10.12	1.48	10.54	1.45	13.38	3.81	8.85	5.65	7.11	2.25
28_01_2020_run#1	5.07	1533	4.04	Below LOD	2.2	13.3	19.3	138.4	24.7	64.8	94.6	92.2	94.5	515	511	61.9	5.01	4.89	1.24	541	541	55.5	121.8	14.23	60.4	14.7	2.77	2.82	14.4	2.43	16.27	3.51	9.85	1.51	10.44	1.64	14.08	3.93	9.82	5.7	7.12	2.44
28_01_2020_run#1	4.94	1530	3.63	Below LOD	2.32	12.4	18	144.2	25.3	63.8	94.2	95.3	95.2	512	511	63.1	4.68	4.69	1.38	548	546	56.2	121	14.31	60.8	14.8	2.71	2.8	16.1	2.29	16.2	3.42	9.9	1.46	10.5	1.53	13.44	3.74	9	5.71	7.55	2.28
28_01_2020_run#1	5.02	1526	4.03	Below LOD	2.09	13.8	19	137.9	25	66.3	94.1	92.3	93	515	519	62.4	4.85	4.6	1.06	545	548	55.6	120.9	14.87	62.3	13.6	2.57	2.5	15	2.71	16.3	3.49	10.61	1.58	10.5	1.6	13.3	4.16	10	5.6	6.94	2.44
28_01_2020_run#2	4.94	1480	3.88	Below LOD	1.96	13.2	18.1	135	24.7	63.2	90.4	90.8	91.4	501	500	59.5	5.1	4.72	1.17	531	543	55.2	119.4	14.26	58.9	13.8	2.72	2.85	14.4	2.5	16.5	3.45	9.84	1.38	10.17	1.48	13.8	3.97	9.04	5.49	7.3	2.39
28_01_2020_run#2	5.13	1518	3.97	Below LOD	2.35	12.5	18.7	142.9	25.1	66.8	99.1	95.7	96.4	535	530	62.3	4.34	4.91	1.14	563	557	57	124	15.2	61.5	14.8	2.87	2.81	15.7	2.53	16.2	3.43	10.5	1.52	10.74	1.65	13.6	3.87	9.8	5.97	7.73	2.33
28_01_2020_run#2	5.13	1496	3.96	Below LOD	1.87	12.7	18.4	139.9	26.1	64.6	95.2	92.5	94.1	500	493	62.2	5.05	4.84	1.08	527	544	54.6	120	14.74	61.9	14.4	2.88	2.69	15.6	2.36	16.3	3.37	10.56	1.53	10.4	1.57	13.7	3.82	9.28	5.54	7.21	2.37
28_01_2020_run#2	4.82	1530	3.79	Below LOD	2.35	13.1	18.4	144.3	24.7	66.4	94.1	95	94.2	505	506	62.4	4.62	4.77	0.87	548	542	55.7	121.1	14.1	60.8	13.4	2.76	2.67	15.5	2.58	15.4	3.43	10.05	1.6	10.8	1.44	13.7	3.9	9.28	5.75	7.46	2.37
28_01_2020_run#2	5.23	1566	3.95	Below LOD	2.22	11.8	18.5	145.1	25.8	68.8	95.5	99.4	96.1	529	523	63.9	5.42	4.77	1.17	576	557	55.2	122.7	15.07	64.6	14.5	2.78	2.62	15.3	2.61	16.2	3.45	10.66	1.66	10.7	1.51	13.6	3.87	9.44	5.72	7.35	2.36
28_01_2020_run#2	4.98	1620	3.92	Below LOD	2.21	13.5	19.8	142	25.7	68.5	95.9	97.1	95	515	528	65.8	4.46	4.83	0.94	562	560	56.5	121.1	14.5	60.9	14.9	2.7	2.74	16.3	2.54	16.8	3.52	10.44	1.46	10.6	1.52	13.8	4.08	9.1	5.63	7.39	2.38
28_01_2020_run#2	4.83	1498	3.79	Below LOD	1.83	13.5	18.4	140.5	24.5	62.1	90.7	91.7	93.3	497	506	61.7	4.52	4.95	0.89	528	534	54.5	118.7	14.14	60.4	14.4	2.4	2.67	14.5	2.63	16.1	3.36	10.55	1.52	10.6	1.72	13.67	3.91	9.26	5.62	7.14	2.33
28_01_2020_run#2	4.98	1539	4.02	Below LOD	2.36	13.7	18.8	146	25.1	65.2	93.9	95	95.4	524	521	62.9	4.67	4.72	1.21	563	554	56.6	123	14.87	62.5	13	2.82	2.98	16.5	2.37	15.8	3.42	10.6	1.54	9.84	1.39	13.8	3.85	9.4	5.7	7.47	2.42
28_01_2020_run#2	5.04	1508	3.93	Below LOD	2.07	13.5	18.5	139.7	26.3	63.1	89.8	93.7	93.4	506	514	62.3	4.65	4.79	1.19	550	548	56.5	120.3	14.84	60.2	14.4	2.66	2.89	15	2.51	17.3	3.48	10.15	1.46	10.72	1.69	13.5	3.87	9.04	5.58	7.32	2.38
28_01_2020_run#2	5.27	1570	3.82	21	2.5	12.3	20.4	147	26.3	70.1	101.2	100.1	101.3	542	546	65.7	5.6	4.81	0.99	569	566	57.6	123.9	15.4	63.1	15.1	3.1	2.63	16.3	2.55	16.4	3.52	11.2	1.62	11.4	1.55	14	3.99	9.59	5.84	7.93	2.34
28_01_2020_run#2	4.96	1492	3.71	Below LOD	2.12	13.9	18.2	129.4	24.4	63.9	85.8	88.5	90.2	486	486	60.7	4.24	5	0.99	540	524	54.8	118.7	14.3	60.1	13.4	2.59	2.83	14.3	2.51	14.7	3.12	9.53	1.49	10.2	1.45	13.65	3.94	8.7	5.71	7.12	2.34
28_01_2020_run#2	5.07	1576	4.1	Below LOD	2.03	13.3	19.3	147.6	25.8	66.1	98.6	102	98.6	535	528	64.5	5.62	4.74	1.15	567	563	57.5	121.7	15.06	61.6	14.3	2.98	2.66	14.8	2.62	16.8	3.71	10.11	1.64	10.6	1.74	13.8	3.87	9.66	5.63	7.76	2.42
28_01_2020_run#2	5.15	1525	4.08	Below LOD	2.17	12	19	140.5	25.6	67.8	92.2	93.7	94.3	518	521	63	5.1	4.84	1.15	549	549	55.5	121.7	14.45	59.7	15.6	2.7	2.76	16	2.5	15.9	3.41	11	1.5	10.5	1.67	13.78	4.03	10	5.61	7.27	2.36
28_01_2020_run#2	4.78	1500	3.58	Below LOD	2.05	13	18.1	141.5	24.3	65.6	92.8	94.7	92.8	505	490	60.4	4.59	4.73	1.04	531	544	54.6	119.8	14.38	60.4	14	2.86	2.78	15.5	2.46	17	3.52	10.3	1.44	10.2	1.32	13.5	3.81	9.14	5.72	7.37	2.38
29_01_2020_run#3	5.22	1451	3.75	Below LOD	2.2	12.9	17.8	135.2	25.8	62.5	91.1	93.1	93	500	494	60.9	4.68	4.94	1.01	521	537	55.3	118.7	14.24	58.4	13.78	2.73	2.65	15.2	2.42	16.2	3.48	10.1	1.48	9.84	1.48	13.69	3.7	8.83	5.65	7.38	2.27
29_01_2020_run#3	5.46	1658	4.25	6.7	2.18	13.1	19.4	145.2	25.2	70.2	100.2	97.3	95.8	528	558	66.7	5.16	4.54	1.2	585	581	56.3	122	15.17	66.3	14.2	2.93	3.02	15.4	2.77	16.4	3.31	10.56	1.57	11.22	1.53	13.1	4.07	9.75	5.71	7.48	2.51
29_01_2020_run#3	4.83	1418	3.75	7.9	1.92	13	18.1	126.5	24.1	61.5	90.1	84.4	89.6	507	501	56.9	4.45	4.6	1.06	511	507	52	118.3	14.77	56.7	12.7	2.72	2.7	15.2	2.24	15.9	3.44	10	1.52	10.14	1.55	13.9	3.81	9.22	5.36	7.14	2.3
29_01_2020_run#3	4.57	1451	3.53	Below LOD	2.07	13	19.3	140.7	25.4	62	92.5	92.8	95	506	511	60.6	4.6	4.91	1.01	526	538	57	120.7	14.35	60.2	14	2.69	2.66	15.4	2.37	16.03	3.42	10.26	1.518	10.58	1.57	13.4	3.88	9.4	5.92	7.37	2.33
29_01_2020_run#3	5.14	1670	4.16	Below LOD	2.36	13.2	18.8	156	27	72.3	101.7	101	98	544	569	70.7	5.04	4.93	1.1	608	604	58.2	128	15.7	68.2	15.8	2.79	2.99	15.1	2.85	16.7	3.36	11.15	1.49	10.72	1.65	14.8	4.12	9.11	5.65	7.6	2.6
29_01_2020_run#3	5.35	1693	4.05	Below LOD	2.14	13	18.6	146	25.8	71.4	97.9	96.4	94.1	531	555	67.6	5.16	5.43	1.16	595	584	56	124.5	15.6	66	14.4	2.77	2.6	15.6	2.65	16.7	3.59	10.73	1.57	10.7	1.49	13.45	4.34	9.59	5.7	7.53	2.71
29_01_2020_run#3	4.5	1392	3.47	Below LOD	2.18	12.8	17.7	134	24.5	61.3	87.6	89.1	92.3	510	492	57.3	4.58	4.68	1.02	504	501	52.2	118.6	13.87	54.6	13.3	2.67	2.67	15	2.27	14.7	3.42	9.56	1.47	9.55	1.36	13.44	3.61	9.1	5.48	6.87	2.24
29_01_2020_run#3	5.03	1624	4.23	Below LOD	2.07	13.2	19.3	150.1	25.5	67.7	95.9	96.4	95.4	511	533	65.2	4.95	5	1.12	576	570	56.4	121.5	15.05	65.6	14.5	2.8	2.9	15.7	2.69	16.55	3.42	11.13	1.59	11.7	1.53	14.18	4.03	9.49	5.98	7.67	2.45
29_01_2020_run#3	5.7	1743	4.35	Below LOD	2.31	12.9	18.7	152	27.6	76.6	97.7	98.6	100.5	573	601	68.3	4.83	5.11	1.37	618	568	56.6	130.4	15.98	66.7	15.2	2.95	3.06	15.39	2.62	16.5	3.44	11.52	1.55	10.7	1.64	15.3	4.82	9.37	5.72	7.67	2.63
29_01_2020_run#3	5	1637	4.3	16.3	2.19	13.1	18.3	150.9	25.8	69.8	96	101	95.7	522	544	66.9	5.02	4.72	1.04	590	583	58.1	123.2	15	66.6	15.1	2.81	2.88	15.1	2.68	17	3.43	10.12	1.44	10.51	1.52	14.27	4.51	9.22	5.62	7.48	2.37
29_01_2020_run#3	5.05	1569	3.92	Below LOD	2.18	12.9	18.5	145.4	25.26	66.4	97.5	101	97.7	512	520	64.9	4.65	4.79	1.07	566	563	56.9	121.7	14.69	62.5	14.12	2.67	2.76	15.4	2.54	16.3	3.49	10.33	1.58	10.69	1.59	13.06	4.14	9.33	5.77	7.56	2.41
29_01_2020_run#3	4.84	1530	3.68	Below LOD	1.99	13.1	18.7	142.5	24.5	64.1	90.9	95.3	96	499	495	62.4	4.89	4.43	1	552	549	55.7	118	14.56	61.7	14.3	3	2.84	15.1	2.48	16.2	3.35	10.1	1.46	10.28	1.59	13.9	3.82	9.1	5.51	7.3	2.3
29_01_2020_run#3	5.38	1626	4.35	Below LOD	1.96	13.1	19.8	141.9	26.1	67.4	97.2	93.9	93.3	513	528	65.4	4.86	4.66	1.15	591	571	55	121.6	15.18	64.1	15.1	2.71	2.86	15.5	2.52	16.79	3.44	10.23	1.6	10.48	1.48	14.8	4.22	10.8	5.92	7.29	2.57
29_01_2020_run#3	4.72	1413	3.59	Below LOD	2.18	13	18	130.9	25.3	59.8	86	89.1	93	497	477	57.5	4.82	5.09	1.01	509	505	54.8	117.8	13.88	56.4	13.3	2.75	2.54	15.2	2.27	15.09	3.41	9.29	1.47	10.4	1.45	12.7	3.25	8.73	5.53	7.27	2.4
29_01_2020_run#3	4.88	1465	3.8	8.3	1.98	12.8	18.1	136.8	25.2	61.9	90.8	94.5	93.7	485	465	60.6	4.6	4.54	1.07	516	545	56.1	117.3	13.49	56.3	14.01	2.71	2.57	15.2	2.39	16.2	3.39	10.28	1.52	10.48	1.45	12.52	3.43	9.11	5.63	7.21	2.13
29_01_2020_run#3	5.51	1596	3.87	8.7	2.46	13.8	19.1	135.2	25	68.3	95.8	91	92.3	524	520	62.3	4.72	5.18	1.1	557	546	55.3	122.6	15.17	59.6	13.7	2.85	2.87	15.4	2.59	16.5	3.46	11	1.52	10.55	1.58	14.24	4.11	9.42	5.7	7.57	2.44
30_01_2020_run#4	5.01	1467	3.72	Below LOD	2.07	12.5	17.5	127.4	24.5	64.1	85	87.5	92.1	523	513	58.4	4.59	4.82	1.13	513	504	53.1	119.9	14.59	58.5	13.9	2.7	3.08	15.1	2.37	16.3	3.38	10.4	1.52	10.43	1.48	13.8	3.91	8.74	5.25	7.42	2.4
30_01_2020_run#4	4.99	1544	4.1	7.7	2.2	13.7	19.2	144.2	25.7	66.3	99.2	97.5	96.1	505	512	65.3	4.96	4.78	1.11	563	581	55.8	122.2	14.61	61	14.16	2.74	2.82	15.6	2.67	16.9	3.45	10.23	1.54	11.13	1.55	13.3	3.89	9.41	5.78	7.35	2.34
30_01_2020_run#4	5.01	1622	3.91	Below LOD	2.28	12.2	19.3	145.5	26.1	65.3	96	94.1	94.2	536	513	63.8	4.73	4.83	1.18	556	551	55.8	123.7	14.74	64.5	14	2.6	3.01	16.1	2.7	16.3	3.4	10.35	1.64	11	1.54	14.2	3.92	9.7	5.47	7.5	2.39
30_01_2020_run#4	4.99	1628	4.02	Below LOD	2.18	13.9	19	155.5	26	65.3	96.4	98	95.8	523	511	67.4	5.09	4.76	0.98	557	584	57.8	123.2	14.53	67.3	15.7	2.81	2.55	15.5	2.53	16.8	3.44	10.25	1.66	10.78	1.58	13.59	3.87	9.76	6.26	7.35	2.37
30_01_2020_run#4	4.99	1418	3.86	6.8	2.02	13.2	17.6	126.2	24.8	64	87.5	85.3	88.9	498	509	56.4	4.5	4.77	1.07	527	495	52.8	119.8	14.92	56.6	13.2	2.8	2.85	14.8	2.27	14.86	3.38	10.44	1.5	9.36	1.45	13.5	3.91	8.1	5.37	7.5	2.34
30_01_2020_run#4	5	1489	3.92	Below LOD	2	13.5	18.5	143.2	24.7	67	97.4	94.7	95.9	504	513	60.3	5.11	4.88	1	546	536	54.5	117.6	14.5	59	14.2	2.68	2.52	15.2	2.6	16	3.52	10.22	1.42	10.57	1.52	13.7	3.89	9.14	5.93	7.31	2.4
30_01_2020_run#4	4.95	1438	3.78	Below LOD	2.2	11.4	18	140	25.5	64	91.4	92.7	94.1	499	510	60.3	4.38	4.83	0.9	545	537	56.6	120.8	14.44	61.1	14	3.13	2.7	14.2	2.45	16.7	3.39	10.28	1.414	10.82	1.45	13.5	3.92	9.16	5.61	7.42	2.38
30_01_2020_run#4	5.03	1505	4	Below LOD	2.1	13.1	19.1	144.8	25.4	66	94.9	95	95.1	505	514	62.2	5.09	4.79	1.16	547	562	57	123.4	14.76	65	14.8	2.79	2.68	15.5	2.54	17	3.59	10.4	1.61	10.48	1.588	13.3	3.89	9.27	5.55	7.29	2.31
30_01_2020_run#4	5	1599	3.88	Below LOD	2.2	13.9	18.8	140	25.5	66.3	94.9	93.3	94.2	545	513	64.4	4.61	4.91	1.2	563	547	56	126.9	15.24	61.5	13.4	3.1	2.99	17.8	2.53	15.8	3.42	10.37	1.65	11.2	1.56	14.86	3.93	10.08	5.54	7.72	2.65
30_01_2020_run#4	5.01	1597	3.96	Below LOD	2.06	13	19	146.6	25.8	63.1	98.7	97.4	96.9	512	509	64.3	4.67	4.67	1.14	538	559	55.3	118.6	13.81	62.9	15.1	2.88	2.8	15.5	2.65	15.9	3.47	10.18	1.49	10.26	1.51	13.5	3.86	9.62	5.95	7.53	2.36
30_01_2020_run#4	4.98	1490	3.98	Below LOD	2.15	12.7	19	142.4	25.8	68.4	91.3	95	93.8	502	512	61.7	5.33	5.07	1.04	540	546	56.2	121.1	14.66	58.3	15	2.84	2.72	14.4	2.51	15.74	3.53	10.27	1.405	10.35	1.66	12.9	3.88	9.4	5.46	7.6	2.35
30_01_2020_run#4	5.03	1498	3.86	8.2	2.09	13	18.5	146.1	24.56	64.4	93.1	97.6	95.8	496	512	61.2	5.7	4.73	0.99	545	549	56.8	118.9	14.58	62.1	13.8	2.69	2.67	15.5	2.48	17.1	3.36	10.32	1.62	10.86	1.66	13.6	3.92	8.88	5.82	7.49	2.27
30_01_2020_run#4	5.02	1521	3.92	Below LOD	2.13	12.6	18.8	133.4	24.4	67.8	93.7	87.4	90.3	518	515	61.9	3.9	4.74	1.13	564	521	53.2	120.3	15	60.9	13.7	2.7	3.01	15.6	2.56	15.3	3.32	10.26	1.55	10.41	1.42	13.3	3.95	9.3	5.33	6.85	2.39
30_01_2020_run#4	4.98	1436	3.88	Below LOD	2.16	12.6	17.9	135.3	26.4	64	95.5	93.4	96.4	514	508	59.3	5.01	4.86	1.18	520	528	57.1	120.7	14.31	56.9	13.7	2.73	2.7	14.8	2.34	15.9	3.64	10.32	1.55	9.82	1.64	14.01	3.86	8.75	5.56	7.36	2.37
30_01_2020_run#4	4.99	1636	3.9	9.7	2.19	14.3	20	146.4	26.2	67.2	101.1	101.3	96.7	533	515	66.9	5.1	4.61	1.18	578	585	57.5	125.8	14.51	67.4	14.4	2.76	2.71	16.6	2.76	16.5	3.46	10.35	1.65	11.6	1.54	13.8	3.93	11.1	6.13	7.62	2.5
30_01_2020_run#4	5.01	1552	3.91	Below LOD	2.05	13.7	18	133.9	25.5	64.3	89.8	91.6	92.5	523	511	59.4	4.57	5.09	1.15	539	527	53.4	123.3	14.79	60.1	13.3	2.6	2.66	15.51	2.6	15.8	3.39	10.24	1.52	9.7	1.42	14.3	3.86	8.9	5.73	7.28	2.34
30_01_2020_run#4	5.11	1690	4.06	Below LOD	2.35	13.8	19.7	149	27.5	69.4	96.2	100.3	100.5	541	521	71	4.76	4.92	0.96	588	596	59	125.5	15.53	68.8	15.2	3.07	2.91	16.3	2.59	16.7	3.46	10.49	1.61	11.85	1.67	14.9	3.99	9.9	5.78	7.89	2.41
30_01_2020_run#5	4.89	1477	4.02	Below LOD	2.17	13.2	18.1	140.2	25.3	63.2	94.9	93	95	507	488	61.3	4.85	4.72	1.13	533	541	55.4	123.2	14.3	59.9	14.5	3.11	2.73	15.5	2.39	15.8	3.61	10.05	1.49	10.8	1.45	13.8	3.79	9.2	5.52	7.5	2.31
30_01_2020_run#5	4.8	1464	3.78	Below LOD	1.95	14.2	17.9	138.3	24.5	63.6	88.2	89.4	92.1	512	494	59.5	4.74	4.72	0.97	519	503	52.2	119.2	14.22	57	12.95	2.75	2.66	15.1	2.37	16.3	3.43	10.02	1.33	9.75	1.52	13.9	3.9	9.15	5.5	7.21	2.26
30_01_2020_run#5	5.26	1534	3.6	6.8	2.13	12.5	18.16	137.4	25.7	65.8	89.4	89.2	92.6	513	520	60	4.71	4.56	1.07	541	526	54	121.3	14.72	61.2	14.6	2.62	2.95	15.01	2.46	15.4	3.58	10.62	1.53	10.51	1.56	13.2	4	8.42	5.56	7.42	2.47
30_01_2020_run#5	5.07	1680	4.49	Below LOD	2.12	12.8	20.5	152	25.6	69.8	107.6	103.5	99.2	512	530	69.2	4.94	5.18	1.13	607	612	59.7	121.7	15.04	66.5	15.5	2.98	2.76	16.3	2.74	17.2	3.43	10.62	1.73	11.2	1.55	13.4	4.09	10.49	6.31	7.55	2.5
30_01_2020_run#5	5.01	1486	3.86	9.2	2.19	12.2	18.7	133.7	25.3	63.1	95	92.4	92.5	499	487	59.3	4.8	4.74	1.11	525	542	56	118.8	14.22	59	13.3	2.59	2.72	13.6	2.49	15.3	3.48	9.92	1.53	9.97	1.52	13.3	3.51	9.16	5.77	7.11	2.08
30_01_2020_run#5	5.15	1820	4.53	Below LOD	2.07	15.7	20.4	145.4	25.3	73.4	105	99.9	96.7	524	557	70.4	4.78	5.3	1.06	628	593	56.4	122.3	15.82	69.5	13.4	2.74	2.83	16.8	2.69	16.51	3.28	10.23	1.68	11.5	1.55	14	4.28	10.5	5.51	7.48	2.68
30_01_2020_run#5	4.95	1680	4.02	Below LOD	2.17	13.4	20.1	151.1	25.6	68.3	105.5	103.1	96.8	520	542	69.7	4.89	5.01	1.06	600	621	60.2	119.6	15.8	68	17.3	3.14	3.18	16.8	2.79	16.83	3.48	10.62	1.74	10.9	1.86	13.2	4.12	9.58	6.11	7.65	2.46
30_01_2020_run#5	5.13	1562	3.43	Below LOD	2.4	12.1	18.7	142.5	26.2	67.1	98.7	96	98.7	541	518	61.8	4.64	4.8	1.25	554	545	57.2	123.2	15.29	61.9	14.8	2.78	2.81	16.2	2.41	16.1	3.8	10.8	1.51	11.2	1.48	15.11	3.76	8.6	5.48	7.76	2.76
30_01_2020_run#5	4.42	1530	3.86	Below LOD	2.06	12.7	18.8	141	24.4	63.7	96.6	92.3	90	482	470	60.9	4.73	5.2	1.12	518	546	55.5	118	13.7	60	14.8	2.8	2.75	14.3	2.53	16.6	3.23	10.5	1.38	10.5	1.55	13.7	3.69	9.5	5.58	7.34	2.2
30_01_2020_run#5	5.01	1612	Below LOD	Below LOD	2.05	12.2	19.5	144.7	25.8	66.4	101.6	99.4	96	505	504	67.4	4.86	4.74	1.03	575	598	57.6	121.7	14.43	63.1	16.1	2.86	2.45	15.3	2.76	17.2	3.32	10.01	1.6	10.2	1.58	13.06	3.89	10.7	5.87	7.37	2.6
30_01_2020_run#5	4.83	1434	3.55	Below LOD	2.18	13.7	17.9	132.5	25.1	60.1	83.4	87.7	89	506	488	55.3	4.72	4.85	1.12	506	492	52.9	118.5	13.92	52.4	12.9	2.68	2.54	14.5	2.37	14.69	3.23	10.03	1.45	9.5	1.42	13.7	3.79	8.37	5.17	7.54	2.4
30_01_2020_run#5	5.39	1740	4.28	Below LOD	2.38	14.9	20.9	148	25.9	73.2	110.3	102.8	99.1	542	555	71.2	4.9	5.5	1.18	610	599	58.9	125	15.3	69	14.2	2.92	2.87	15.8	2.59	17.3	3.49	11.8	1.56	11.2	1.58	13.9	4.02	9.73	6.18	7.17	2.44
30_01_2020_run#5	4.64	1412	3.48	Below LOD	1.97	11.9	16.9	130.7	25.3	60.2	88.7	89.9	93	500	475	58.5	4.79	4.9	1.07	497	514	54.3	120.3	13.29	54.9	13.4	2.67	2.48	14.2	2.31	15.6	3.28	9.52	1.24	10.52	1.42	13.1	3.7	9.04	5.55	7.1	2.22
30_01_2020_run#5	5.33	1718	4.38	Below LOD	2.3	14.1	19.2	148.2	25.4	71.8	101.2	98.3	97.6	545	550	67.4	4.81	4.67	1.27	601	574	58.4	123.4	15.7	65.3	14.8	2.81	3.07	16.5	2.83	17.4	3.53	12.2	1.62	10.51	1.51	13.7	4.03	9.49	6.27	7.68	2.75
30_01_2020_run#5	5.02	1567	3.9	Below LOD	2.24	12.4	19.3	147.7	24.9	65.3	96.9	95	94.9	503	509	65.5	4.76	4.86	0.92	543	564	54.5	119.1	14.25	61.5	15.6	2.68	2.74	14.7	2.54	16.4	3.3	9.94	1.46	10.53	1.54	12.63	3.65	9.2	5.76	7.25	2.11
30_01_2020_run#5	4.8	1577	4.08	Below LOD	1.89	12.6	18.8	148.6	26	66.6	98.5	95.2	93.4	499	514	66	4.83	4.41	1.11	561	570	55.3	120.5	14.36	62.9	14.2	2.89	2.83	15.3	2.46	15.4	3.42	10.65	1.54	10.71	1.46	13.5	3.94	9.23	5.65	7.59	2.55
30_01_2020_run#5	5.14	1564	3.63	Below LOD	2.15	13.3	19.1	141.5	26.3	68.2	93.6	94	97.5	539	538	62.6	4.87	4.96	1.01	564	546	56.2	125.5	15.52	61.3	14.2	2.52	3.02	16.5	2.55	16.6	3.58	10.98	1.6	10.97	1.62	14.9	4.22	9.33	5.6	8.25	2.62
30_01_2020_run#5	5.06	1507	Below LOD	Below LOD	Below LOD	14.5	18.01	138.1	24.6	64.6	95.3	89.6	92.9	514	512	60.7	4.74	4.73	1.13	547	529	54.9	119.6	14.83	60.6	12.9	2.87	2.78	15.1	2.28	16.2	3.6	10.22	1.48	10.05	1.54	14.48	4.15	9.48	5.41	7.14	2.54
31_01_2020_run#6	4.95	1504	3.97	Below LOD	2.11	12.1	18.7	139.6	25.3	64.6	93.8	93.1	93.2	504	504	62.3	4.76	4.69	0.97	538	536	55.1	119.7	14.43	59.7	13.9	2.75	2.77	14.2	2.55	16.59	3.31	9.99	1.52	10.56	1.56	13.26	3.85	9.13	5.66	7.13	2.27
31_01_2020_run#6	5.1	1567	3.86	Below LOD	2.2	13.2	18.5	145.3	26	66.1	95.8	95.5	97.6	522	517	62.5	4.96	4.97	1.34	546	546	56.8	122.9	14.5	61.1	14.6	2.78	2.85	15.2	2.39	16.2	3.67	10.45	1.5	9.91	1.47	14.3	3.76	9.55	5.82	7.77	2.46
31_01_2020_run#6	4.95	1501	3.82	Below LOD	2.01	11.8	17.9	137.2	24.9	62.2	92.5	93.1	94.3	510	489	61.8	4.91	4.64	0.93	528	531	54.9	119.9	14.13	57.4	14.2	2.83	2.91	14.2	2.49	16.2	3.49	10.04	1.46	10.26	1.47	13.2	3.71	9.17	5.64	7.42	2.28
31_01_2020_run#6	5.13	1630	3.92	7	2.31	14.9	18.76	141.1	25.3	67.5	93.4	91.5	95.7	528	538	63	4.68	4.67	1.46	574	547	56.1	124.1	15.8	65.3	14.2	2.71	2.93	16.3	2.54	16.1	3.42	11.19	1.62	10.6	1.63	14	4.22	9.61	5.59	7.32	2.58
31_01_2020_run#6	4.64	1459	3.86	Below LOD	2	13.5	18	139.1	24.2	63.3	90.8	93	91.5	492	501	59.3	4.87	4.71	0.79	543	542	54	114.9	14.03	59.8	14	2.74	2.32	15.2	2.43	15.82	3.47	10.2	1.44	10.66	1.58	13.4	3.81	8.93	5.63	7.43	2.2
31_01_2020_run#6	5.22	1627	4.16	Below LOD	2.17	14	19.6	148.4	26.3	68.3	99.8	97.9	97.5	536	552	65.7	5.48	5.23	1.31	607	595	59.5	125.6	15.83	66.2	14.4	2.78	2.9	16.73	2.58	17.2	3.39	10.61	1.66	11.14	1.6	14.7	4.08	9.54	5.66	7.43	2.58
31_01_2020_run#6	4.95	1504	3.91	Below LOD	2.28	13.6	18.19	140.2	26.3	65.4	94	95.9	96	538	518	62.7	4.86	5.06	1.3	554	551	57.6	123.5	14.79	61.6	13.7	2.76	2.72	14.8	2.43	15.88	3.51	10.64	1.46	10.67	1.55	13.78	3.9	9.58	5.81	7.9	2.4
31_01_2020_run#6	5.26	1583	4.22	Below LOD	1.94	12.8	19.6	140.9	25.3	64.7	95.5	96.1	96.7	506	508	62.2	4.52	4.63	1.04	550	565	56.9	118.6	14.76	63.7	14.52	2.76	2.72	14.9	2.61	17	3.51	9.8	1.61	10.6	1.56	14.2	3.96	9.7	6.12	7.79	2.45
31_01_2020_run#6	5.09	1504	3.84	Below LOD	1.96	13.6	18.37	133.3	25	65	91.8	92	91.7	505	500	61.5	4.79	5.24	0.83	535	524	54.6	121.2	14.8	59.2	14	2.7	2.69	14.6	2.58	15.4	3.47	10	1.49	10	1.36	13.2	4.02	8.85	5.45	7.28	2.44
31_01_2020_run#6	4.97	1540	Below LOD	Below LOD	Below LOD	13.9	18.7	143	27.2	65.9	93	94.7	96.1	526	516	63.5	5.16	4.74	1.02	546	550	57	126	14.64	59.7	14.4	2.79	2.88	16.6	2.44	16	3.52	9.96	1.47	10.78	1.62	14.49	3.97	9.45	5.69	7.4	2.63
31_01_2020_run#6	4.74	1440	3.53	Below LOD	2.25	12.9	18.7	137.6	25.7	64.5	95.9	94.9	95.2	503	487	62.2	4.78	4.85	1.13	516	535	56.6	120.7	14.1	59.2	14.3	2.75	2.74	14.7	2.5	16.3	3.26	10.4	1.45	9.9	1.52	12.89	3.75	9.07	5.75	7.14	2.27
31_01_2020_run#6	4.9	1491	3.89	Below LOD	2.17	12.8	18.2	136.1	24.1	64.9	92.7	89.3	91.6	495	506	62.4	4.96	4.83	0.82	530	527	51.9	118.2	14.6	57.8	14.1	2.78	2.75	14.8	2.52	15.4	3.42	10.03	1.49	10.3	1.6	14.1	3.99	9.3	5.55	7.28	2.33
31_01_2020_run#6	5.02	1562	3.87	Below LOD	2.11	13.1	19.8	140.4	25.7	65.5	92.9	94.3	92.8	508	515	61.3	5.48	4.82	1.23	563	559	55.5	119.9	14.65	64.1	14.2	2.7	2.7	15.4	2.44	16.5	3.2	10.74	1.52	10.21	1.51	13.07	3.79	9.48	5.56	7.25	2.37
31_01_2020_run#6	5.41	1630	4.16	Below LOD	2.3	14	19.3	146	25.8	66.7	98.2	100.3	98.4	534	553	63	4.67	4.47	0.94	581	566	58.3	122.7	14.91	65.9	14.2	2.82	2.98	15.7	2.56	17.2	3.54	10.9	1.57	11.19	1.55	14.06	4.16	9.56	5.84	7.36	2.43
31_01_2020_run#6	5.1	1583	3.86	8.4	2.14	13.1	19.4	144.5	26.5	67.3	93.6	94.1	94.7	511	513	64	4.61	4.94	1.12	561	552	55.7	121	14.65	62.5	14.4	2.68	2.74	15.1	2.46	16.5	3.55	10.36	1.59	10.49	1.6	14.06	3.79	9.6	5.37	7.27	2.22
31_01_2020_run#6	4.75	1457	3.95	Below LOD	1.98	12.26	17.85	139.2	25.5	62.8	93	92.1	93.6	503	490	60.9	4.7	4.9	1.3	515	519	54.3	118.9	14.13	56.5	14.05	2.83	2.76	15.1	2.58	16.3	3.43	10.14	1.5	9.96	1.5	13.86	3.7	8.83	5.93	7.77	2.41
31_01_2020_run#7	5.26	1665	4.24	Below LOD	2.2	13.73	19.9	145.9	25.5	69.6	100.5	99.2	94.8	520	530	67	4.89	4.85	1.09	600	588	57.9	126	15.75	64.1	14.64	2.71	3.01	15.98	2.7	16.2	3.48	10.4	1.6	11.22	1.54	14.1	3.99	10.19	5.86	7.37	2.51
31_01_2020_run#7	5.03	1457	3.57	Below LOD	2.1	11.8	17.4	135	25.1	62.3	89.3	91.3	94.3	505	497	58.9	4.71	4.7	1.09	523	519	53.2	117.6	14.01	56.7	13.7	2.87	2.66	14.3	2.34	16	3.44	10.01	1.51	9.6	1.49	13.54	3.75	8.44	5.54	7.27	2.31
31_01_2020_run#7	4.95	1517	4.1	Below LOD	2.17	13.8	20.2	142.2	25.4	64.4	102.2	98.6	95	515	514	63.3	4.85	4.96	1.16	551	561	58.8	123.9	15	61.3	14.8	2.75	2.75	15.8	2.67	16.9	3.38	10.57	1.54	10.08	1.65	13.85	3.86	9.67	5.83	7.8	2.33
31_01_2020_run#7	4.7	1470	3.88	6.7	2.01	12.9	17.7	137.7	25.1	63	89.3	92.2	93.4	505	489	60.1	4.69	4.74	0.92	519	529	54.8	118.8	13.75	57.3	13.43	2.85	2.66	13.9	2.38	15.7	3.46	10.25	1.44	10.36	1.54	13.57	3.87	8.71	5.45	7.16	2.3
31_01_2020_run#7	4.91	1466	3.77	Below LOD	2.15	12.5	18.1	134.3	25.3	64.1	93.1	90.2	93.9	514	505	60.5	4.76	5	1.16	538	530	54.7	121.9	14.55	58.4	14.6	2.78	2.83	15.2	2.39	16.1	3.39	10.83	1.44	10.46	1.65	13.4	3.81	9.23	5.56	7.46	2.45
31_01_2020_run#7	5.17	1612	3.94	Below LOD	2.16	13.6	19.3	145.5	25.3	67.4	95.2	95.5	94.8	511	523	64.3	4.85	4.59	1.03	563	559	55.4	119.9	14.88	64.5	14.18	2.73	2.75	15.9	2.59	16.16	3.52	9.96	1.64	11.1	1.478	14	3.96	9.43	5.73	7.2	2.34
03_02_2020_run#8	5.01	1503	3.97	Below LOD	2.13	13.1	17.65	128.3	24.3	64	91	88.7	89.4	500	491	61.5	4.51	4.66	1.17	524	508	52.3	114.6	14.65	57.5	13.55	2.57	2.69	14.86	2.48	14.88	3.07	10.06	1.5	9.56	1.47	12.94	3.67	9.04	5.49	6.82	2.23
03_02_2020_run#8	5.14	1493	3.83	Below LOD	2.12	12.6	19.3	138.9	25	63.4	89.4	94.2	94.7	507	501	63.1	4.96	5.01	1.06	525	539	55.5	119.6	14.53	59.6	14.28	2.88	2.82	15	2.45	16.2	3.5	10.53	1.48	10.9	1.56	13.49	3.78	9.48	5.6	7.3	2.31
03_02_2020_run#8	4.88	1585	3.9	Below LOD	2.22	14.1	20	146.3	26.3	69.7	95.9	96.2	95.1	529	538	64.2	4.61	4.61	0.94	588	569	56.7	126.1	14.27	64	14	2.8	2.77	15.8	2.58	16.5	3.48	10.3	1.48	11.36	1.53	13.9	3.94	9.58	5.82	7.39	2.38
03_02_2020_run#8	5.13	1633	4.05	Below LOD	2.09	12.9	19.8	148.4	25.58	70.4	106.9	100.8	97.1	531	572	64.4	4.71	5.4	1.24	594	583	57.2	125.7	14.75	65.2	14.82	2.9	2.8	17.5	2.75	17	3.58	10.57	1.71	11.5	1.61	14.7	4.16	9.73	6.16	8	2.59
03_02_2020_run#8	4.9	1474	3.99	9.3	2.13	12	18.6	140.2	26	65.9	97.6	97	95.8	516	515	60.9	5.4	4.59	0.92	553	555	56.1	123.7	14.51	61.5	13.97	2.74	2.73	15.7	2.45	16.7	3.5	10.14	1.54	9.93	1.56	13.39	3.74	8.66	5.87	7.36	2.31
03_02_2020_run#8	5.41	1631	4.33	Below LOD	2.13	13.5	19.7	156.4	26.3	67.6	102	100	98.5	514	535	67.2	5.23	4.95	1.24	593	603	59.2	125.4	15.19	66.7	16	2.83	2.77	16.6	2.77	17.31	3.56	10.31	1.53	11.39	1.58	14.33	4.15	9.76	6.22	7.59	2.41
03_02_2020_run#8	4.7	1434	3.76	Below LOD	2.07	13	18.13	137.3	25.2	61.2	90.1	94.1	93.7	500	490	59.1	4.9	4.36	1.09	521	529	55.5	118.6	14.34	59.1	14.6	2.74	2.74	14.4	2.41	16.6	3.37	10.11	1.37	10.27	1.6	12.73	3.88	9.11	5.5	7.54	2.38
03_02_2020_run#8	5.13	1582	3.99	8.9	2.39	13.6	19	142.5	26.7	66.3	92.5	95.3	97.7	527	523	63.5	5	5.24	0.91	560	558	58	125	14.63	60.4	13.6	2.86	2.84	15	2.53	16.02	3.53	10.5	1.54	10.52	1.53	13.92	3.97	9.35	5.87	8.06	2.38
03_02_2020_run#8	4.89	1538	3.83	5.6	2.09	13.1	17.96	138.8	24.4	66.3	94.8	92.5	92.4	509	525	62.2	4.7	4.76	1.1	566	551	55	122.4	14.54	61.8	14	2.84	2.73	15.1	2.45	15.5	3.43	10.25	1.53	10.03	1.56	13.83	3.87	9.42	5.55	7.24	2.22
03_02_2020_run#8	5.13	1573	4.02	Below LOD	2.16	13.1	19.39	144.8	26.5	67.3	96.1	95.9	97.8	531	520	64.5	4.91	5.32	1.03	564	561	57.9	127.1	15.22	62.2	14.6	2.79	2.66	16	2.51	16.8	3.47	10.05	1.53	10.44	1.52	13.68	3.99	9.3	6.05	7.65	2.44
03_02_2020_run#8	5.04	1478	3.75	Below LOD	2.1	12.5	17.27	141.9	25.5	62.6	89	93.7	93.9	502	491	60.2	4.83	4.7	1.08	525	531	55.4	119	14.33	58.8	14.6	2.7	2.83	14.9	2.43	17.6	3.54	10.53	1.54	11.18	1.61	14	3.69	9.06	5.78	7.74	2.44
03_02_2020_run#8	5.32	1652	4.03	7.1	2.14	13.7	19.6	144	25.3	70.9	101.8	96.8	95.7	528	546	67.1	4.48	4.77	1.05	591	579	56.7	123.7	15.16	67.3	14.3	2.85	2.75	15.1	2.69	16.37	3.3	10.44	1.6	10.42	1.61	13.96	4.04	9.9	6.22	7.51	2.51
03_02_2020_run#8	4.81	1545	3.92	6.5	2.1	12.5	19.1	144.2	24.6	65.1	96.9	94.4	92.9	495	499	63	5.2	4.75	1.06	549	560	55.8	117.5	14.26	63.1	14.4	2.67	2.75	15.7	2.54	16.1	3.35	10.32	1.52	11.3	1.45	13.17	3.79	9.17	5.8	7.27	2.19
03_02_2020_run#8	4.92	1495	4.11	Below LOD	2.13	12.8	18.2	135.3	26.3	64.4	94.9	93.3	95	522	502	62.6	4.8	4.8	1.12	524	536	56	120.1	14.6	58.3	14.2	2.75	2.88	15	2.48	16	3.42	10.22	1.5	11.18	1.6	13.5	3.87	9.48	5.47	7.38	2.4
03_02_2020_run#8	5.01	1550	3.78	Below LOD	2.14	13.3	18.2	130	24.2	65.7	91.8	87.8	89.4	506	502	61.5	4.6	4.83	1.1	530	517	51.5	117.1	14.61	59.5	13.44	2.69	2.68	15.4	2.43	14.9	3.3	10.26	1.5	9.92	1.43	13.52	3.82	9.02	5.25	6.96	2.33
03_02_2020_run#9	4.86	1526	3.86	8.8	2.12	13	18.7	142.4	24.9	65.5	93.5	94.1	93.5	501	507	63.8	4.84	4.82	1.11	551	553	55.7	119.8	14.74	63.8	14.1	2.78	2.72	15.3	2.56	16.2	3.37	10.56	1.52	10.52	1.47	13.45	4.07	9.16	5.56	7.17	2.3
03_02_2020_run#9	5.02	1523	3.71	Below LOD	2.14	13	18.5	139.1	25.9	64.8	96.5	94.8	96.2	533	511	60.8	4.78	4.94	1.05	534	531	55	124.1	14.41	57	14.1	2.92	2.83	15.2	2.31	16.1	3.58	10.1	1.54	10.85	1.6	14.38	3.8	9.41	5.79	7.76	2.38
03_02_2020_run#9	4.87	1544	4.09	Below LOD	2.16	12.8	19.3	141.9	25.6	66.4	97.9	100.2	97.1	512	516	65.3	4.76	4.62	1.06	561	579	57.8	121.1	14.31	64.1	15	2.74	2.73	15.32	2.74	16.62	3.45	9.81	1.57	10.9	1.51	14.04	3.87	9.5	5.91	7.51	2.47
03_02_2020_run#9	5.1	1585	4.02	Below LOD	2.08	13.3	19.1	146.8	25.1	67.3	98.1	97.7	95.4	517	530	64.6	4.84	4.74	1.07	568	562	55.9	121.4	14.9	63.6	14.1	2.68	2.78	15.3	2.55	16.7	3.45	10.25	1.52	10.24	1.57	13.7	3.98	9.47	5.84	7.3	2.34
03_02_2020_run#9	5.22	1584	4	9.6	2.14	13.1	18.8	144.5	25.2	67.9	99.8	95	94.9	521	534	64.2	4.85	4.46	1.08	558	557	56.1	121.4	14.75	63.9	14.4	2.66	2.77	15.4	2.7	16.7	3.37	10.5	1.43	11.11	1.56	13.67	3.93	9.93	5.65	7.62	2.29
03_02_2020_run#9	5	1478	3.71	Below LOD	2.13	12.8	17.9	133.7	25.4	62.4	86.6	90.2	92.4	503	498	58.6	4.76	5.04	1.07	525	521	53.7	120.4	14.47	58.6	13.5	2.81	2.75	15.22	2.54	15.7	3.42	10.37	1.49	10.16	1.52	13.2	3.87	8.92	5.55	7.32	2.47
03_02_2020_run#9	5.1	1555	3.93	9.1	2.12	13	18.4	139.3	25.2	65.4	90.2	94	92.5	526	518	63.2	4.81	4.64	1.12	559	545	55.8	122.7	14.68	60.5	13.6	3.01	2.8	15.6	2.52	16.3	3.39	10.8	1.61	9.89	1.53	13.98	3.9	8.81	5.8	7.34	2.52
03_02_2020_run#9	5.17	1544	4	6.6	2.14	13	18.4	139.7	25.4	64.9	90.2	91.7	94.7	518	502	61.2	4.8	5.08	1.08	533	535	56	118.9	14.68	57.7	13.9	2.67	2.74	15.2	2.34	15.79	3.51	9.96	1.45	10.58	1.51	13.8	3.91	9.29	5.48	7.77	2.38
03_02_2020_run#9	5.06	1519	3.84	10.6	2.16	12.8	18.32	139.7	25.2	67.1	96.6	92.3	94.5	528	523	62.2	4.69	5.26	1.21	552	547	55.9	121.4	14.87	61.3	14.26	2.59	2.78	15.5	2.49	16.2	3.52	10.53	1.53	10.57	1.62	14.48	4.08	9.49	5.82	7.47	2.3
03_02_2020_run#9	4.88	1548	3.99	Below LOD	2.08	13.3	19.3	147.7	25.6	65.1	100.4	99.3	97.8	510	511	64.4	4.93	5.01	0.95	550	575	57.7	120.8	14.39	62.1	14.8	2.83	2.73	15	2.56	16.2	3.37	9.99	1.51	10.92	1.54	13.12	3.75	9.46	6.01	7.68	2.24
03_02_2020_run#9	4.8	1497	3.79	Below LOD	2.1	13	17.8	131.2	24.7	63.4	87.1	87.7	89.9	495	492	59	4.69	4.68	0.91	521	517	53.4	121.5	14.42	56	13.48	2.7	2.75	14.9	2.4	15.8	3.47	10.1	1.42	9.6	1.51	14.1	3.89	8.96	5.28	6.99	2.35
03_02_2020_run#9	5	1549	4.14	Below LOD	2.17	13	19.2	145.9	25.5	64.3	98.6	97.7	95.3	502	505	64.3	5	4.91	1.2	544	561	56.3	120	14.6	60	14.68	2.79	2.8	15.5	2.55	17.2	3.41	10.65	1.56	11.32	1.53	13.43	3.9	9.22	5.82	7.34	2.48
03_02_2020_run#9	4.98	1586	4.2	Below LOD	2.13	13	20.1	151.7	26.9	68	97.7	104.4	101.8	523	523	68.4	4.83	5.23	1.12	588	608	60.3	127.4	14.78	64.1	14.8	2.8	2.77	15.4	2.67	17	3.47	10.49	1.55	11.07	1.64	14.01	4.04	9.69	5.87	7.62	2.41
03_02_2020_run#9	5.08	1506	3.74	Below LOD	2.14	13	18.4	136.1	24.5	64.8	91.5	91.5	91.3	509	516	61.5	4.77	4.19	1.04	543	534	53.7	118.9	14.58	60.6	13.9	2.84	2.75	15.2	2.36	15.7	3.41	10.18	1.56	10.51	1.46	13.56	3.85	9.03	5.57	7.11	2.29
10_06_2020_run#10	5.01	1534	3.88	Below LOD	2.1	12.9	18.49	140.2	25.6	65.1	93.6	93.9	94.6	510	513	62.3	4.67	4.82	1.08	548	546	55.8	120.8	14.41	60.8	14.17	2.85	2.74	15.17	2.44	16.22	3.43	10.28	1.51	10.47	1.559	13.46	3.88	9.05	5.65	7.42	2.45
10_06_2020_run#10	4.99	1524	3.95	7.3	2.17	13.1	18.75	141.8	25.4	65.5	94.3	94.4	94.4	514	511	62.6	4.99	4.8	1.1	546	549	55.4	121.3	14.78	61	14.24	2.74	2.81	15.54	2.59	16.18	3.43	10.58	1.525	10.58	1.46	13.99	3.92	9.62	5.7	7.4	2.42
10_06_2020_run#10	5.14	1549	3.9	Below LOD	2.14	13.34	18.8	141.9	25.6	71.2	93.9	96	95.5	522	527	61.8	4.72	4.83	1.11	559	551	56.9	122.7	16.9	62.2	14.21	2.9	2.85	16.2	2.5	16.8	3.47	10.74	1.55	10.43	1.63	13.92	4.36	8.98	5.75	7.35	2.43
10_06_2020_run#10	4.97	1523	3.9	Below LOD	2.12	12.72	18.51	139.5	24.6	63	94.1	93.4	94.2	507	509	62.6	4.83	4.73	1.03	543	546	55.3	120.7	14.34	60.5	14.19	2.59	2.7	14.82	2.5	16	3.4	9.47	1.5	10.59	1.48	13.56	3.68	9.7	5.63	7.4	2.17
10_06_2020_run#10	5.03	1531	4.03	Below LOD	2.12	13.6	18.7	143.3	24.96	65.9	95.1	95.7	94.5	520	516	62.7	4.89	4.78	1.08	549	551	55.5	122	14.92	61.7	14.34	2.53	2.86	15.59	2.57	16.29	3.5	11.82	1.55	10.57	1.58	14.2	3.95	9.27	5.71	7.28	2.53
10_06_2020_run#10	4.94	1525	3.85	Below LOD	2.14	12.3	18.5	139.1	26.4	64.4	93.4	93.1	94.6	504	508	62.1	4.72	4.83	1.1	544	542	55.7	120	13.96	59.9	14	2.91	2.71	14.89	2.46	16.1	3.3	10.1	1.498	10.42	1.51	13.12	3.78	9.33	5.63	7.64	2.31
10_06_2020_run#10	5.17	1536	4.17	Below LOD	2.04	14.5	18.51	147.1	25.06	67.2	97.7	103.8	93.4	527	539	62.7	4.98	4.79	1.07	555	569	54.8	120.4	15.25	62.7	15.62	2.69	2.88	15.99	2.56	16.39	3.51	11.38	1.52	11.36	1.64	14.3	3.98	9.23	6.1	7.26	2.51
10_06_2020_run#10	5.02	1567	3.68	Below LOD	2.13	13.4	18.8	139.2	27	66.5	89.1	98	95.5	488	520	61.3	4.59	4.77	1.11	547	534	57.5	118.6	14.39	59.3	13.7	2.84	2.74	15.4	2.43	16.02	3.34	9.86	1.51	10.35	1.57	13.09	3.89	9.3	5.69	7.67	2.33
10_06_2020_run#10	5.23	1567	3.94	7.7	1.96	12.9	18.7	147	24.5	66.4	93.9	101.2	95.4	515	533	63.2	4.92	4.61	1.102	542	564	57.5	120	15.03	60.6	14.88	2.78	2.71	15.5	2.52	17.5	3.31	10.93	1.56	10.73	1.46	13.04	3.86	8.7	5.85	7.09	2.33
10_06_2020_run#10	4.87	1576	3.81	Below LOD	2.21	13.2	18.24	132	24.8	64.6	93.7	89.1	94	515	510	62.6	4.7	5.17	1.08	552	529	54.3	122.6	14.23	60.4	13.08	2.71	2.78	14.94	2.49	15.58	3.43	10.24	1.5	9.7	1.54	13.68	3.91	9.15	5.27	7.59	2.38
10_06_2020_run#10	5.15	1580	4.07	5.8	2.33	13.5	19.5	146	28.9	67.4	98.3	94.1	95.1	530	523	66.3	4.93	4.85	1.06	563	562	55.4	124.7	14.7	63.5	14	2.76	2.82	15.9	2.67	16.5	3.49	10.85	1.63	10.8	1.5	14.47	3.87	10.15	5.49	7.37	2.56
10_06_2020_run#10	4.5	1421	Below LOD	6.1	2.03	11.55	18	135.9	25.4	59.5	90.3	87.7	94.3	492	466	58.9	4.76	4.86	1.043	509	512	55	119	13.4	57.6	12.82	2.76	2.6	14.78	2.4	16.05	3.4	9.26	1.34	9.7	1.57	13.84	3.57	9.15	5.45	7.39	2.14
10_06_2020_run#10	4.66	1451	3.83	7.7	2.15	11.7	17.7	137	25.2	61.2	94.3	91.5	94.1	500	468	61.4	4.56	4.58	1.03	522	527	54.2	121	13.6	58.6	13.5	2.83	2.69	14.2	2.4	15.7	3.36	9.8	1.47	10.6	1.56	13.9	3.83	9.7	5.48	7.56	2.22
10_06_2020_run#10	5.32	1623	4.34	6	2.19	14.2	19.56	159	25.9	68.2	102.8	102.8	94.8	536	542	67.6	4.98	4.73	1.19	585	601	58.5	126.4	15.53	66.2	15.3	2.88	2.91	15.8	2.87	16.8	3.46	10.67	1.67	12.1	1.58	14.4	4.29	10.26	6.33	7.55	2.55
10_06_2020_run#10	4.58	1472	3.64	Below LOD	2.33	12.4	18	140	25.4	61.1	89.8	90.7	94.5	499	482	61.1	4.74	5.17	1.027	524	527	54.3	120.6	13.65	58.7	13.6	2.77	2.71	13.87	2.41	16.01	3.49	10.06	1.49	10.62	1.536	13.28	3.73	8.94	5.32	7.38	2.18
10_06_2020_run#10	5.01	1576	4.2	Below LOD	2.09	13.25	19.4	151.3	24.9	66.5	99.7	98	94.3	531	536	68	4.93	4.99	1.09	576	579	55.8	124.6	15.01	65.4	14.9	2.63	2.77	15.63	2.78	16.26	3.57	10.2	1.5	11.17	1.509	14.34	4.02	10.19	5.52	7.52	2.52
10_06_2020_run#10	5.14	1530	4.02	6.2	2.13	13.4	17.9	143	25.4	65.2	90.8	95.6	97.7	524	526	61.1	4.65	4.57	1.09	545	549	56.9	122.6	15.26	59.7	14.6	2.83	2.85	15.48	2.41	16.6	3.44	10.91	1.46	11.03	1.6	13.57	3.89	9.15	6.08	7.32	2.43
10_06_2020_run#10	5.01	1492	3.41	Below LOD	1.98	12.9	17.9	137.1	24.6	64.8	88.2	92.5	93	484	505	56.3	4.87	4.67	0.96	522	500	53.6	113.9	14.37	57	13.7	2.66	2.73	15.9	2.46	15.76	3.32	9.99	1.504	9.51	1.44	13.32	3.91	8.27	5.7	7.25	2.36
10_06_2020_run#10	5.05	1540	3.66	6.4	1.94	12.3	17.8	135.4	25.2	64.9	87.2	91.5	93.9	489	513	58.3	4.82	4.7	1.07	545	508	54.3	115.1	14.19	59.7	13.5	2.66	2.52	16.1	2.36	15.8	3.31	10.3	1.54	10.39	1.59	13.75	3.95	9.12	5.58	7.43	2.34
10_06_2020_run#10	5.45	1626	4.5	5.9	2.26	14.02	19.9	159.4	26.1	70.9	106.3	105.6	95.9	532	553	67.6	4.81	4.97	1.137	594	608	57.5	124.3	15.3	66.8	15.4	2.99	2.92	16.3	2.96	17	3.59	10.8	1.63	11.7	1.61	13.8	3.91	10.1	6.22	7.75	2.42
10_06_2020_run#11	4.99	1496	3.93	8.1	2.1	12.92	18.69	139.7	25.1	64.3	94.3	92.9	92.9	513	495	62.5	4.66	4.96	1.12	535	548	55.5	122.6	14.61	59.8	14.6	2.77	2.84	14.7	2.54	16.8	3.46	10.51	1.58	10.34	1.537	13.29	3.88	9.16	5.74	7.24	2.38
10_06_2020_run#11	5.13	1557	3.93	Below LOD	2.19	13.7	18.42	143.8	25.3	65.3	93.9	95.1	95.1	520	519	63.3	5.28	4.66	1.23	557	546	56	122.1	14.61	61.2	13.88	2.77	2.76	15.1	2.51	16.34	3.41	10.33	1.491	10.54	1.56	14.06	4.03	9.23	5.6	7.54	2.36
10_06_2020_run#11	5.09	1584	4.11	Below LOD	2.07	13.1	19.12	151	24.8	69.1	94.4	98.4	92.6	517	537	63.9	4.97	4.87	1.09	574	551	55.8	122.1	14.68	63.4	15.29	2.76	2.82	16	2.71	17.1	3.39	11.08	1.65	11.29	1.46	14.1	4.11	9.76	6.21	7.26	2.4
10_06_2020_run#11	4.48	1554	3.65	Below LOD	2.14	12.39	18.3	132.6	25.9	63.6	93.9	87.8	92.7	470	487	60.8	4.72	4.66	0.909	547	545	54.6	116.5	14.4	61.7	13.34	2.7	2.39	15.2	2.48	14.9	3.47	9.57	1.542	9.97	1.55	13.32	3.47	9.17	5.09	7.18	2.35
10_06_2020_run#11	5.09	1479	4.01	6	2.2	12.85	18	141.5	24.8	66.6	92.9	94.3	95	517	517	61.1	4.43	4.76	1.13	539	543	54.5	121.6	14.58	58.6	13.5	2.62	2.85	15.8	2.35	16.47	3.43	10.26	1.4	10.05	1.521	13.64	3.79	8.61	5.59	7.22	2.36
10_06_2020_run#11	5.52	1780	3.99	Below LOD	2.19	13.9	20.7	156.4	28	73.8	95.5	107.3	101.8	536	574	68.6	5.51	4.87	1.16	614	556	59.4	124.8	14.7	66.8	15.2	2.97	2.88	15.47	2.69	18.1	3.43	10.93	1.72	11.24	1.61	13.76	4.49	10.11	6.73	7.92	2.41
10_06_2020_run#11	4.85	1493	3.94	5.8	2.31	12.7	18.05	142	24.6	61.3	94.3	94.5	93.3	528	491	61.3	4.99	4.8	1.037	538	548	54.8	125.8	14.54	60.6	15.2	2.73	2.78	15.2	2.51	16	3.38	10.21	1.39	10.57	1.47	13.71	3.73	9.64	5.66	7.54	2.36
10_06_2020_run#11	5.17	1500	3.82	Below LOD	2.05	14.3	18.6	141.9	25.6	66.4	93.7	95.7	92.9	522	526	60.7	4.7	4.8	1.21	538	546	55.9	120.9	14.64	58.4	14.1	2.79	2.89	15.83	2.48	16.72	3.49	10.65	1.39	10.45	1.6	13.71	4.23	9.15	6	7.5	2.374
10_06_2020_run#11	4.98	1595	4.04	Below LOD	2.07	13.3	19.9	142.6	25.1	65	94.7	93.3	91	515	514	65.9	5.41	4.83	1.05	568	550	55.4	123.4	14.68	64.7	14.1	2.84	2.91	14.8	2.53	15.64	3.42	10.78	1.556	10.65	1.51	14.46	3.81	9.16	5.43	7.39	2.4
10_06_2020_run#11	4.67	1529	3.93	6.6	2.15	12.5	18.1	138.1	25.9	64.2	93.4	93.4	95.8	489	494	60.3	4.42	4.76	0.956	537	542	57.1	115.8	14.5	57.1	14	2.77	2.62	15.3	2.45	16.53	3.43	9.78	1.48	10.43	1.56	13.05	3.74	9.04	5.47	7.41	2.35
[truncated: 223 more rows]

## Sheet: SM Table 5 - Std Comparison
SM Table 5. Standard comparison
Results on secondary standard (STHS6/80-G) using different primary standards for data reduction
[truncated: 67 more rows]

## Sheet: SM Table and Figs 6 
SM Table 6.1. Reference data comparison between Streck and Wacaster 2006, and Jarosewich et al., 1980.
[truncated: 799 more rows]
